# Supplementary material for: Vanadyl species-catalyzed complementary β-oxidative carbonylation of styrene derivatives with aldehydes
Source: Royal Society of Chemistry journal article supplement (doi:10.1039/c4ob02621g), 2014-12-19
Supplement: c4ob02621g1.pdf [file c4ob02621g1.pdf]

**Electronic Supplementary Material (ESI) for Organic and Biomolecular  
Chemistry**

**This journal is © The Royal Society of Chemistry 2014**

**Supplementary Information**

**For**

**Vanadyl Species-Catalyzed, Complementary  $\beta$ -Oxidative  
Carbonylations of Styrene Derivatives with Aldehydes**

*Shiue-Shien Weng,\* Wen-Chieh Yang, Anandhan Ramasamy, Gobi Rajeshwaren, Yi-Ya  
Liao, Chien-Tien Chen\**

*Department of Chemistry, National Tsing Hua University, Hsinchu,*

*Taiwan E-mail: [ctchen@mx.nthu.edu.tw](mailto:ctchen@mx.nthu.edu.tw)*

## Supplementary Information

### Table of Contents

|                                                                                                                                            |          |
|--------------------------------------------------------------------------------------------------------------------------------------------|----------|
| General-----                                                                                                                               | S2       |
| General procedure for preparation of vanadyl catalysts (VOCl <sub>2</sub> -(H <sub>2</sub> O) <sub>x</sub> , or VO(OTf) <sub>2</sub> ----- | S2-S3    |
| Catalyst screening for β-hydroxylation-carbonylation or β-peroxidation -carbonylation of styrene (Table S1)-----                           | S4       |
| Dehydration of β-hydroxy carbonyl compounds Table S2-----                                                                                  | S5       |
| Representative procedure for β-hydroxylation-carbonylation (procedure I)----                                                               | S6       |
| Representative procedure for β-peroxidation-carbonylation (procedure II):<br>-----                                                         | S6-S7    |
| Analytical data for β-hydroxyketones 3a-v-----                                                                                             | S7-S16   |
| Analytical data for β-peroxyketones 4a-t, and 5-----                                                                                       | S17-S26  |
| ESI mass spectrum of vanadyl hydroxo complex 8 (VO(acac) <sub>2</sub> -OH) -----                                                           | S26      |
| Cross dioxygenation of α-Methyl styrene catalyzed by V(O)(acac) <sub>2</sub> -----                                                         | S27      |
| Analytical data for 11a-d-----                                                                                                             | S27-S29  |
| NMR spectra of list compounds-----                                                                                                         | S30-S123 |

**General.**  $^1\text{H}$ -NMR and  $^{13}\text{C}$ -NMR were recorded Jeol JVM-EX400 (400 MHz  $^1\text{H}$ , 100 MHz  $^{13}\text{C}$ ) or Varian UNITY INOVA-500 (400 MHz  $^1\text{H}$ , 100 MHz  $^{13}\text{C}$ ) spectrometers in deuteriochloroform with chloroform as an internal reference unless otherwise stated. Chemical shifts are reported in ppm ( $\delta$ ), coupling constants,  $J$ , are reported in Hz. Electrospray ionization (ESI) mass spectra were recorded with data reported in the form  $m/e$  (intensity relative to base = 100%). Analytical TLC was performed on Merck silica gel plates with F-254 indicator. Visualization was accomplished with UV light or with phosphomolybdic acid (PMA) and  $\text{KMnO}_4$  staining agents. Column (flash) chromatography was performed by using 40-63  $\mu\text{m}$  silica gel. Toluene was dried over Na with benzophenone-ketyl intermediate under nitrogen atmosphere and distilled before use.  $\text{CH}_3\text{CN}$  was dried over  $\text{CaH}_2$  and distilled before use.  $\text{VO}(\text{acac})_2$ ,  $\text{VO}(\text{SO}_4)$ ,  $\text{Fe}(\text{acac})_2$  were purchased from Aldrich Chemicals. Oxovanadium (IV) dibenzoylmethanate ( $\text{VO}(\text{dbm})_2$ ); oxovanadium (IV) dipivaloylmethanate ( $\text{VO}(\text{tmhd})_2$ ); oxovanadium (IV) di-1,1,1,5,5,5-hexafluoroacetylacetonate ( $\text{VO}(\text{hfacac})_2$ ) were prepared according to the literature reports.<sup>1</sup>

**General procedure for preparation of vanadyl catalyst ( $\text{VOCl}_2\text{-(H}_2\text{O)}_x$  or  $\text{VO}(\text{OTf})_2$ )<sup>2</sup>**

In a flame-dried, 50-mL, two-necked, round-bottomed flask was placed 2.5 mmol vanadyl sulfate- $\text{VOSO}_4\cdot 5\text{H}_2\text{O}$  followed by addition of anhydrous MeOH (2.5 mL). To the above solution, a solution of 2.5 mmol (1 equiv) of  $\text{BaCl}_2$  (or  $\text{Ba}(\text{OTf})_2$ ) in MeOH (2.5 mL) was slowly added at ambient temperature. After having been stirred

---

[1] a) S. Ideda, A. Yamamoto, S. Kurita, K. Takahashi, T. Watanabe, *Inorg. Chem.* **1966**, 5, 611; b)

---

Johnson, D. A.; Waugh, A. B. *Polyhedron* **1983**, *2*, p. 1323

for 30 min, the reaction mixture became turbid with copious amount of barium sulfate precipitation. The mixture was filtered through a short plug of Celite. The filtrate was evaporated to give faint blue solid which was further dried at 120 °C for 4 hours *invacuo*. It can be stored at ambient temperature for several weeks in dry cabinet and can be used directly. The VOX<sub>2</sub> series of compounds (brand name as Clip-all® series, US patent # 6,541,659 B1, 2003) is now available directly from the institution (e-mail: [ctchen@mx.nthu.edu.tw](mailto:ctchen@mx.nthu.edu.tw)).

---

[2] a) C.-T. Chen, S. Bettigeri, S.-S. Weng, V. D. Pawar, Y.-H. Lin, C.-Y. Liu, W.-Z. Lee, *J. Org. Chem.* **2007**, *72*, 8175; b) N. B. Barhate, C.-T. Chen, *Org. Lett.* **2002**, *4*, 2529; g) S.-W. Hon, C.-H. Li, J.-H. Kuo, N. B. Barhate, Y.-H. Liu, Y. Wang, C.-T. Chen, *Org. Lett.* **2001**, *3*, 869

**Catalyst screening for  $\beta$ -hydroxylation-carbonylation or  $\beta$ -peroxidation-carbonylation of styrene.: Table S1<sup>a</sup>.**

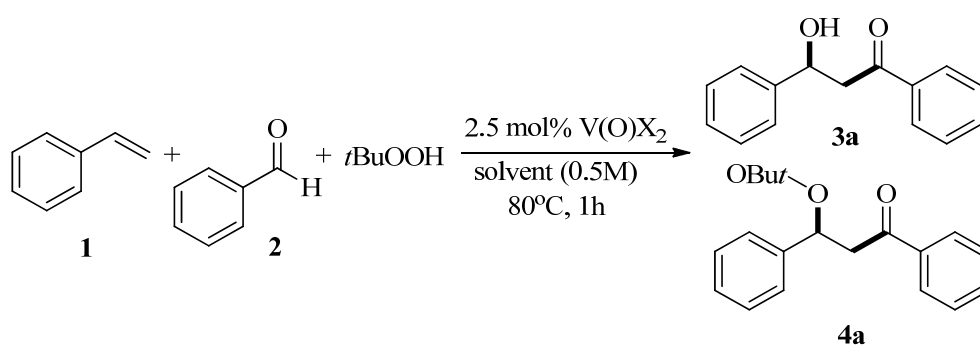

| Entry | Catalyst                         | Solvent                              | Yield of <b>3a</b> (%) <sup>b</sup> | Yield of <b>4a</b> (%) <sup>b</sup> |
|-------|----------------------------------|--------------------------------------|-------------------------------------|-------------------------------------|
| 1.    | MoO <sub>2</sub> Cl <sub>2</sub> | CH <sub>3</sub> CN                   | trace                               | 13                                  |
| 2.    | HfO(Cl) <sub>2</sub>             | CH <sub>3</sub> CN                   | trace                               | — <sup>c</sup>                      |
| 3.    | TiO(OTf) <sub>2</sub>            | CH <sub>3</sub> CN                   | — <sup>c</sup>                      | — <sup>c</sup>                      |
| 4.    | CrO <sub>2</sub> Cl <sub>2</sub> | CH <sub>3</sub> CN                   | — <sup>c</sup>                      | 18                                  |
| 5.    | Fe(acac) <sub>2</sub>            | CH <sub>3</sub> CN                   | trace                               | 16                                  |
| 6.    | VO(Cl) <sub>2</sub>              | Toluene                              | 6                                   | 53                                  |
| 7.    | VO(Cl) <sub>2</sub>              | THF                                  | trace                               | 13                                  |
| 8.    | VO(Cl) <sub>2</sub>              | ClCH <sub>2</sub> CH <sub>2</sub> Cl | <5                                  | 42                                  |

<sup>a</sup> Reaction condition: **1** (1 mmol), **2** (5 mmol), oxometallic species (0.025 mmol), *t*-BuOOH (3 mmol, 5 M in decane), acetonitrile (2 mL), 80 °C, under N<sub>2</sub>. <sup>b</sup> Yields of isolated products are given. <sup>c</sup> No desired product was found.

## Dehydration of $\beta$ -hydroxy carbonyl compounds: Table S2.

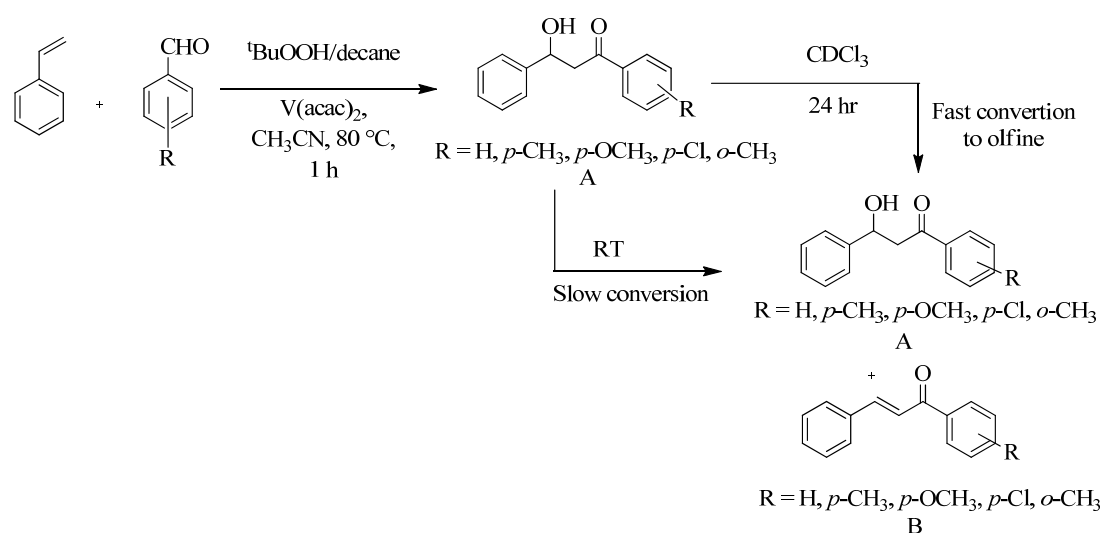

| Entry | Conv. (%) <sup>a</sup> | $\alpha,\beta$ -unsaturated ketone (B) |
|-------|------------------------|----------------------------------------|
| 1     | 29                     |                                        |
| 2     | none                   |                                        |
| 3     | 34                     |                                        |
| 4     | 30                     |                                        |
| 5     | 31                     |                                        |

<sup>a</sup> Determined by <sup>1</sup>H NMR analysis.

### Representative procedure for $\beta$ -hydroxylation-carbonylation (procedure I):

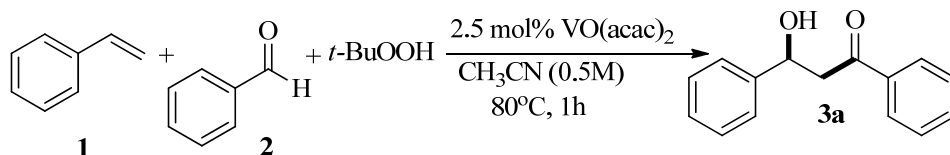

To a mixture of benzaldehyde (510  $\mu$ L, 5.0 mmol) and VO(acac)<sub>2</sub> (6.6 mg, 0.025 mmol, 2.5 mol%) in CH<sub>3</sub>CN (1 mL), styrene (115  $\mu$ L, 1 mmol) was added via syringe under nitrogen at room temperature. The reaction flask was transfer to a preheated oil spot (80 °C) and the 70% aqueous *tert*-Butyl hydrogenperoxide (600  $\mu$ L, 3 mmol) in CH<sub>3</sub>CN (1mL) was added dropwise to the reaction mixture over 30 min via addition funnel under nitrogen at 80 °C and stirred for additional 30 min at 80 °C. The solvent and excess amount of benzaldehyde was removed in vacuum, and the crude product was purified using flash column chromatography on silica gel with ethyl acetate/hexane (1:10) as eluent to afford the  $\beta$ -hydroxyketone 3a (190 mg, 84% yield).

### Representative procedure for $\beta$ -peroxidation-carbonylation (procedure II)

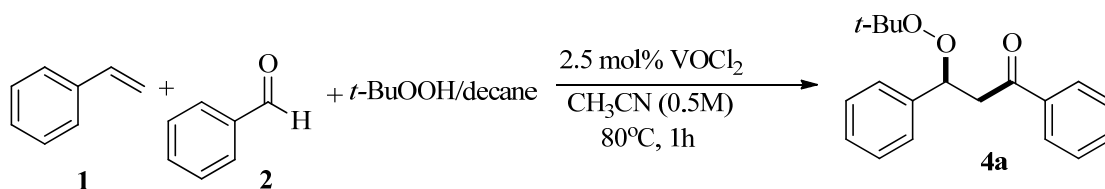

To a mixture of benzaldehyde (510  $\mu$ L, 5.0 mmol) and VOCl<sub>2</sub> (3.4 mg, 0.025 mmol, 2.5 mol%) in anhydrous CH<sub>3</sub>CN (1 mL), styrene (115 $\mu$ L, 1 mmol) was added via syringe under nitrogen at room temperature. The reaction flask was transfer to a

preheated oil spot (80 °C). *tert*-Butyl hydrogenperoxide (600  $\mu$ L, 1.5 mmol, 5-6 M in Decane) was diluted with anhydrous  $\text{CH}_3\text{CN}$  (1 mL) and added dropwise to the reaction mixture over 30 min via addition funnel under nitrogen at 80 °C and stirred for additional 30 min at 80 °C. The solvent and excess amount of benzaldehyde was removed in vacuum, and the crude product was purified using flash column chromatography on silica gel with ethyl acetate/hexane (1:50) as eluent to afford the  $\beta$ -peroxyketones **4a** (238 mg, 80% yield).

### Analytical data for $\beta$ -hydroxyketones **3a-v**

#### 3-Hydroxy-1, 3-diphenyl-propan-1-one (**3a**)<sup>3</sup>

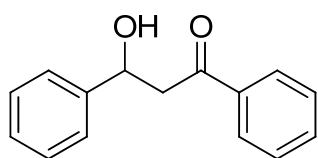

Follow the representative procedure I, isolated by column chromatography (EtOAc/hexanes = 1:20,  $R_f$  = 0.15). The title compound was obtained as a colorless oil.  $^1\text{H}$  NMR ( $\text{CDCl}_3$ , 400MHz):  $\delta$  7.96 (d,  $J=7.5\text{Hz}$ , 2H), 7.60 (t,  $J=7.5\text{Hz}$ , 1H), 7.49-7.45 (m, 3H), 7.39 (t,  $J=7.5\text{Hz}$ , 2H), 7.31 (d,  $J=7.5\text{Hz}$ , 1H), 5.36 (dd,  $J=7.5$ , 4Hz, 1H), 3.67 (br, s, 1H), 3.43-3.35 (m, 2H);  $^{13}\text{C}$  NMR ( $\text{CDCl}_3$ , 100MHz):  $\delta$  200.1, 142.9, 136.5, 133.6, 128.6, 128.5, 128.1, 127.6, 125.7, 70.0, 47.3; M.W. ( $\text{C}_{15}\text{H}_{14}\text{O}_2$ ) 226.2; MS (EI, 20 eV): 226 ( $\text{M}^+$ , 52), 209 (M- $\text{H}_2\text{O}$ , 6), 119 (100), 107 (52).

#### 3-Hydroxy-3-phenyl-3-*p*-tolyl-propan-1-one (**3b**)<sup>3</sup>

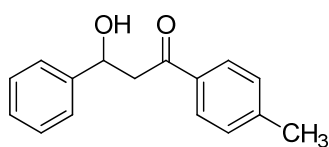

Follow the representative procedure I, isolated by column chromatography (EtOAc/hexanes = 1:20,  $R_f$  = 0.16). The title compound was obtained as a colorless oil.  $^1\text{H}$  NMR ( $\text{CDCl}_3$ , 400MHz):  $\delta$  7.85 (d,  $J=8.0\text{Hz}$ , 2H), 7.46-7.30 (m, 5H), 7.25 (t,  $J=8\text{Hz}$ , 2H), 5.34 (t,  $J=6.0\text{ Hz}$ , 1H), 3.77 (br, s, 1H), 3.34 (d,  $J=6.0$ , 2H), 2.42



(s, 3H).  $^{13}\text{C}$  NMR ( $\text{CDCl}_3$ , 100MHz):  $\delta$  199.8, 144.5, 143.0, 134.1, 129.3, 128.5, 128.2, 127.5, 125.7, 70.0, 47.1, 21.6; M.W. ( $\text{C}_{16}\text{H}_{16}\text{O}_2$ ) 240.3; MS (EI, 20 eV): 240 ( $\text{M}^+$ , 48), 223 (M- $\text{H}_2\text{O}$ , 7), 133 (100), 107 (83).

### 3-Hydroxy-3-phenyl-3-*o*-tolyl-propan-1-one (3c)<sup>3</sup>

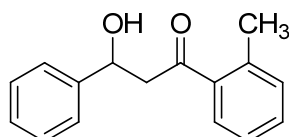

Follow the representative procedure I, isolated by column chromatography (EtOAc/hexanes = 1:20,  $R_f$  = 0.16). The title compound was obtained as a colorless oil.  $^1\text{H}$  NMR ( $\text{CDCl}_3$ ,

400MHz):  $\delta$  7.64 (d,  $J$ =7.6Hz, 2H), 7.42-7.25 (m, 7H), 5.32 (dd,  $J$ =8.4, 3.6 Hz, 1H), 3.84-3.26 (m, 2H), 2.54 (s, 3H).  $^{13}\text{C}$  NMR ( $\text{CDCl}_3$ , 100MHz):  $\delta$  203.8, 143.0, 138.6, 137.1, 132.1, 131.8, 128.9, 128.5, 127.6, 125.7, 70.3, 49.9, 21.5; M.W. ( $\text{C}_{16}\text{H}_{16}\text{O}_2$ ) 240.3; MS (EI, 20 eV): 240 ( $\text{M}^+$ , 30), 223 (M- $\text{H}_2\text{O}$ , 11), 133 (100), 107 (67).

### 3-Hydroxy-1-(4-methoxy-phenyl)-3-phenyl-propan-1-one (3d)<sup>3</sup>

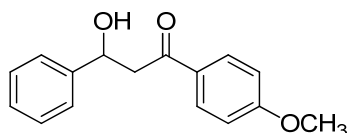

Follow the representative procedure I, isolated by column chromatography (EtOAc/hexanes = 1:20,  $R_f$  = 0.13). The title compound was obtained as a

colorless oil.  $^1\text{H}$  NMR ( $\text{CDCl}_3$ , 400MHz):  $\delta$  7.93 (d,  $J$ =9.2Hz, 2H), 7.45-7.27 (m, 5H), 6.92 (d,  $J$ =8.8 Hz, 2H), 5.32 (dd,  $J$ =7.2, 4.8 Hz, 1H), 3.86 (s, 3H), 3.32-3.30 (m, 2H);  $^{13}\text{C}$  NMR ( $\text{CDCl}_3$ , 100MHz):  $\delta$  198.7, 163.9, 143.0, 130.4, 129.6, 128.5, 127.5, 125.7, 113.8, 70.1, 55.4, 46.8.; M.W. ( $\text{C}_{16}\text{H}_{16}\text{O}_3$ ) 256.3; MS (EI, 20 eV): 256 ( $\text{M}^+$ , 38), 239 (M- $\text{H}_2\text{O}$ , 18), 149 (100), 107 (78).

### 3-Hydroxy-1-naphthalen-2-yl-3-phenyl-propan-1-one (3e)<sup>3</sup>

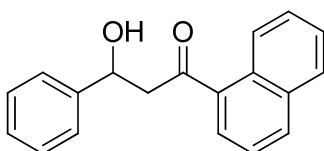

Follow the representative procedure I, isolated by column

chromatography (EtOAc/hexanes = 1:20,  $R_f$  = 0.10);  $^1\text{H}$  NMR ( $\text{CDCl}_3$ , 400MHz):  $\delta$  8.71 (d,  $J=8.4$  Hz, 1H), 8.01 (d,  $J=8.0$  Hz, 1H), 7.90-7.87 (m, 2H), 7.62 (t,  $J=6.8$  Hz, 1H), 7.54 (t,  $J=7.2$  Hz, 1H), 7.49-7.29 (m, 7H), 5.43 (dd,  $J=9.2, 3.2$  Hz, 1H), 3.66 (br, s, 1H), 3.52 (dd,  $J=17.2, 8.8$  Hz, 1H), 3.44 (dd,  $J=17.6, 3.2$  Hz, 1H);  $^{13}\text{C}$  NMR ( $\text{CDCl}_3$ , 100MHz):  $\delta$  203.9, 142.9, 135.1, 133.9, 133.3, 130.0, 128.53, 128.45, 128.3, 128.2, 127.7, 126.5, 125.73, 125.68, 124.3, 70.5, 50.4; M.W. ( $\text{C}_{19}\text{H}_{16}\text{O}_2$ ) 276.3; MS (EI, 20 eV): 276 ( $\text{M}^+$ , 62), 261 ( $\text{M}-\text{H}_2\text{O}$ , 13), 155 (100), 121 (72).

### 1-(*p*-Chlorophenyl)-3-hydroxy-3-phenylpropan-1-one (3f)<sup>3</sup>

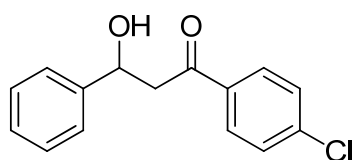

Follow the representative procedure I, isolated by column chromatography (EtOAc/hexanes = 1:20,  $R_f$  = 0.17);  $^1\text{H}$  NMR ( $\text{CDCl}_3$ , 400MHz):  $\delta$  7.88 (d,  $J=8.8$  Hz, 2H), 7.43-7.37 (m, 7H), 5.32 (d,  $J=8.4$  Hz, 1H), 3.55 (br, s, 1H), 3.37 (dd,  $J=17.6, 8.8$  Hz, 1H), 3.29 (dd,  $J=17.2, 3.2$  Hz, 1H);  $^{13}\text{C}$  NMR ( $\text{CDCl}_3$ , 100MHz):  $\delta$  198.7, 142.8, 140.1, 134.9, 129.5, 129.0, 128.6, 127.7, 125.7, 69.9, 47.4; M.W. ( $\text{C}_{15}\text{H}_{13}\text{ClO}_2$ ) 260.7; MS (EI, 20 eV): 262 ( $\text{M}+2$ , 13), 260 ( $\text{M}^+$ , 42), 243 ( $\text{M}-\text{H}_2\text{O}$ , 7), 155 (32), 153 (100), 107 (92).

### 1-(*m*-Chlorophenyl)-3-hydroxy-3-phenylpropan-1-one (3g)<sup>3</sup>

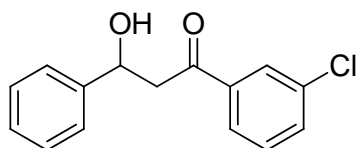

Follow the representative procedure I, isolated by column chromatography (EtOAc/hexanes = 1:20,  $R_f$  = 0.16);  $^1\text{H}$  NMR ( $\text{CDCl}_3$ , 400MHz):  $\delta$  7.92 (t,  $J=2$  Hz, 1H), 7.81 (dt,  $J=8, 1.2$  Hz, 1H), 7.92 (dq,  $J=8, 1.8$  Hz, 1H), 7.44-7.28 (m, 5H), 5.33 (dd,  $J=8.8, 3.2$  Hz, 1H), 3.51 (br, s, 1H), 3.29 (dd,  $J=17.6, 9.2$  Hz, 1H), 3.29 (dd,  $J=17.6, 3.2$  Hz, 1H);  $^{13}\text{C}$  NMR ( $\text{CDCl}_3$ , 100MHz):  $\delta$  198.6, 142.7, 138.0, 135.0, 133.4,

130.0, 128.6, 128.2, 127.7, 126.2, 125.7, 69.9, 47.5; M.W. (C<sub>15</sub>H<sub>13</sub>ClO<sub>2</sub>) 260.7; MS (EI, 20 eV): 262 (M+2, 17), 260 (M<sup>+</sup>, 50), 243 (M-H<sub>2</sub>O, 6), 155 (29), 153 (100), 107 (87).

### 1-(*p*-Bromophenyl)-3-hydroxy-3-phenylpropan-1-one (**3h**)<sup>3</sup>

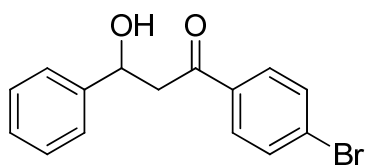

Follow the representative procedure I, isolated by column chromatography (EtOAc/hexanes = 1:20, R<sub>f</sub> = 0.17); <sup>1</sup>H NMR (CDCl<sub>3</sub>, 400MHz): δ 7.79 (d, J=8.8 Hz, 2H), 7.59 (d, J=8.8 Hz, 2H), 7.44-7.27 (m, 5H), 5.33 (dd, J=8.8, 3.2 Hz, 1H), 3.57 (br, s, 1H), 3.36 (dd, J= 17.6, 8.8 Hz, 1H), 3.27(dd, J= 17.6, 3.2Hz, 1H); <sup>13</sup>C NMR (CDCl<sub>3</sub>, 100MHz): δ 198.8, 142.8, 135.2, 131.9, 129.6, 128.8, 128.5, 127.7, 125.6, 69.9, 47.3; M.W. (C<sub>15</sub>H<sub>13</sub>BrO<sub>2</sub>) 304.2; MS (EI, 20 eV): 306 (M+2, 54), 304 (M+ 2, 7), 287 (M-H<sub>2</sub>O, 11), 200 (18), 198 (100), 107 (83).

### 1-(4-Cyanophenyl)-3-hydroxy-3-phenyl-1-propanone (**3i**)<sup>4</sup>

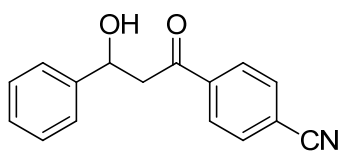

Follow the representative procedure I, isolated by column chromatography (EtOAc/hexanes = 1:5, R<sub>f</sub> = 0.15); <sup>1</sup>H NMR (CDCl<sub>3</sub>, 400MHz): δ 8.02 (d, J=8.4 Hz, 2H), 7.75 (d, J=8.4 Hz, 2H), 7.44-7.28 (m, 5H), 5.35 (dd, J=9.2, 2.8 Hz, 1H), 3.44 (dd, J= 17.6, 9.2 Hz, 1H), 3.29 (dd, J= 17.6, 2.8Hz, 1H); <sup>13</sup>C NMR (CDCl<sub>3</sub>, 100MHz): δ 198.4, 142.6, 139.5, 132.5, 128.6, 128.5, 128.3, 127.9, 125.6, 117.7, 116.6, 69.9, 47.8; M.W. (C<sub>16</sub>H<sub>13</sub>NO<sub>2</sub>) 251.3; MS (EI, 20 eV): 251 (M<sup>+</sup>, 76), 234 (M-H<sub>2</sub>O, 20), 130 (100), 121 (92).

[3] a) H.-J. Xu, Y.-C. Liu, Y. Fu, Y.-D. Wu, *Org Lett.* **2006**, 8, 3449; b) H.-J. Xu, X. Wan, Y.-Y.

### 3-Hydroxy-3-phenyl-1-(thiophen-2-yl)propan-1-one (3j)<sup>4</sup>

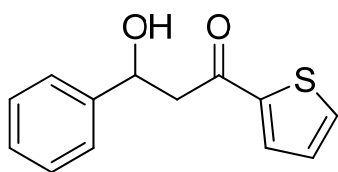

Follow the representative procedure I, isolated by column chromatography (EtOAc/hexanes = 3:7,  $R_f$  = 0.65);  $^1\text{H}$  NMR (400 MHz,  $\text{CDCl}_3$ ):  $\delta$  7.71 (dd,  $J$  = 1.0, 3.8 Hz, 1H), 7.68 (dd,  $J$  = 1.2, 5.0 Hz, 1H), 7.45 (d,  $J$  = 7.4 Hz, 2H), 7.38 (t,  $J$  = 7.4 Hz, 2H), 7.33-7.29 (m, 1H), 7.13 (dd,  $J$  = 3.8, 5.0 Hz, 1H), 5.33 (dd,  $J$  = 4.8, 7.4 Hz, 1H), 3.33-3.30 (m, 2H); 2.64-2.46 (m, 1H);  $^{13}\text{C}$  NMR (100 MHz,  $\text{CDCl}_3$ ):  $\delta$  192.7, 143.7, 142.7, 134.5, 132.7, 128.5, 128.2, 127.7, 125.7, 70.1, 47.9; HRMS(ESI) calcd for  $\text{C}_{13}\text{H}_{12}\text{O}_2\text{S}$  ( $\text{M}^+ + \text{Na}$ ): 255.0456; found: 255.0448.

### 1-(Furan-2-yl)-3-hydroxy-3-phenylpropan-1-one (3k)<sup>4</sup>

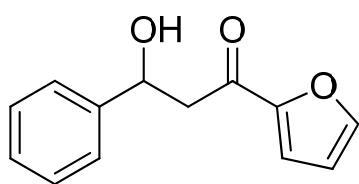

Follow the representative procedure I, isolated by column chromatography (EtOAc/hexanes = 3:7,  $R_f$  = 0.55).;  $^1\text{H}$  NMR (400 MHz,  $\text{CDCl}_3$ ):  $\delta$  7.60 (dd,  $J$  = 0.8, 1.7 Hz, 1H), 7.43 (d,  $J$  = 7.2 Hz, 2H), 7.37 (t,  $J$  = 7.2 Hz, 2H), 7.31-7.27 (m, 1H), 7.23 (dd,  $J$  = 0.8, 3.6 Hz, 1H), 6.55 (dd,  $J$  = 1.7, 3.6 Hz, 1H), 5.31 (dd,  $J$  = 4.5, 7.9 Hz, 1H), 3.25 (d,  $J$  = 4.5 Hz, 1H), 3.24 (d,  $J$  = 1.2 Hz, 1H), 2.99-2.70 (m, 1H);  $^{13}\text{C}$  NMR (100 MHz,  $\text{CDCl}_3$ ):  $\delta$  188.6, 152.3, 146.9, 142.7, 128.5, 127.7, 125.7, 118.0, 112.4, 70.0, 46.9; HRMS(ESI) calcd for  $\text{C}_{13}\text{H}_{12}\text{O}_3$  ( $\text{M}^+ + \text{Na}$ ): 239.0684; found: 239.0679.

### 1-Hydroxy-4-methyl-1-phenyl-3-pentanone (3l)<sup>5</sup>

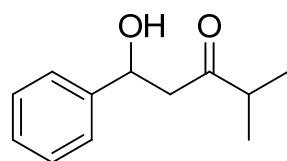

Follow the representative procedure I, isolated by column chromatography (EtOAc/hexanes = 1:20,  $R_f$  = 0.15). The title compound was obtained as a colorless oil.

---

[4] E. Hasegawa, K. Ishiyama, T. Kato, T. Horaguchi, T. Shimizu, *J. Org. Chem.* **1992**, *57*, 5352.

<sup>1</sup>H NMR (CDCl<sub>3</sub>, 400MHz): δ 7.39-7.25 (m, 5H), 5.15 (dd, *J*=8.8, 3.6 Hz, 1H), 3.53 (br, s, 1H), 2.89 (dd, *J*= 17.2, 8.4 Hz, 1H), 3.80 (dd, *J*= 17.2, 3.6 Hz, 1H), 5.15 (heptet, *J*=7.2 Hz, 1H), 2.36-2.21 (heptet, 1H) 1.86-1.64 (m, 5H), 1.37-1.16 (m, 5H); <sup>13</sup>C NMR (CDCl<sub>3</sub>, 100MHz): δ 215.2, 142.9, 128.5, 127.6, 125.6, 69.9, 48.7, 41.5, 17.8; M.W. (C<sub>12</sub>H<sub>16</sub>O<sub>2</sub>) 192.2; MS (EI, 20 eV): 192 (M<sup>+</sup>, 73), 177 (M-H<sub>2</sub>O, 7), 107 (82), 85 (100).

### 1-Cyclohexyl-3-hydroxy-3-phenylpropan-1-one (3m)<sup>6</sup>

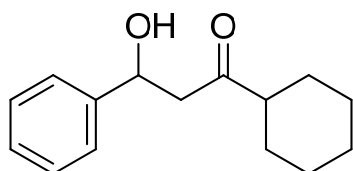

Follow the representative procedure I, isolated by column chromatography (EtOAc/hexanes = 1:20, *R<sub>f</sub>* = 0.14). The title compound was obtained as a colorless oil. <sup>1</sup>H NMR (CDCl<sub>3</sub>, 400MHz): δ 7.35-7.26 (m, 5H),

5.14 (dd, *J*=8, 4 Hz, 1H), 3.52 (br, s, 1H), 2.87 (dd, *J*= 17.6, 8.0 Hz, 1H), 3.80 (dd, *J*= 17.6, 4.0 Hz, 1H), 2.36-2.21 (m, 1H) 1.86-1.64 (m, 5H), 1.37-1.16 (m, 5H).; <sup>13</sup>C NMR (CDCl<sub>3</sub>, 100MHz): δ 214.6, 142.9, 128.4, 128.2, 127.5, 125.5, 69.8, 51.3, 48.9, 28.08, 28.05, 25.7, 25.4; M.W. (C<sub>15</sub>H<sub>20</sub>O<sub>2</sub>) 232.3; MS (EI, 20 eV): 232 (M<sup>+</sup>, 38), 217 (M-H<sub>2</sub>O, 40), 121 (78), 111 (100).

### 3-Hydroxy-1-(3, 4-dimethylphenyl)-3-p-tolylpropan-1-one (3n)<sup>7</sup>

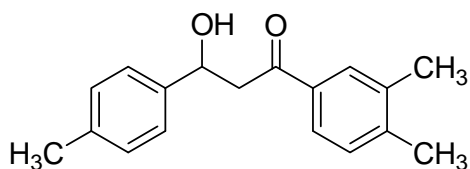

Follow the representative procedure I, isolated by column chromatography (EtOAc/hexanes = 1:20, *R<sub>f</sub>* = 0.11). The title compound was obtained as a

colorless oil.

---

[5] a) Y. Kondo, H. Kudo, H. Naka, D. J. Eisler, F. Garcia, J. Haywood, M. McPartlin, J. V.

- Morey, A. E. H. Wheatley, M. Uchiyama, *J. Am. Chem. Soc.* **2008**, 130, 16193; b) F. h Arikan, J. Li, D. Menche, S. Rudolph, *Org. Lett.* **2007**, 9, 267.
- [6] S. Kanemasa, Y. Norisue, H. Suga, O. Tsuge, *Bull. Chem. Soc. Jap.* **1988**, 61, 3973.

$^1\text{H}$  NMR ( $\text{CDCl}_3$ , 400MHz):  $\delta$  7.72-7.67 (m, 2H), 7.34 (d,  $J=8.0$  Hz, 2H), 7.22-7.18 (m, 3H), 5.30 (dd,  $J=6.8, 5.2$ Hz, 1H), 3.7 (br, s, 1H), 3.34-3.32 (m, 2H), 2.36 (s, 3H), 2.32 (s, 3H), 2.31 (s, 3H);  $^{13}\text{C}$  NMR ( $\text{CDCl}_3$ , 100MHz):  $\delta$  200.2, 143.3, 140.1, 137.2, 137.0, 134.5, 129.9, 129.2, 125.9, 125.7, 69.9, 47.2, 21.1, 20.0, 19.7; M.W. ( $\text{C}_{18}\text{H}_{20}\text{O}_2$ ) 268.4; MS (EI, 20 eV): 268 ( $\text{M}^+$ , 54), 250 (M- $\text{H}_2\text{O}$ , 26), 135 (100), 133 (36).

### 3-Hydroxy-1-(3,4-dimethylphenyl)-3-(naphthalen-3-yl)propan-1-one (3o)

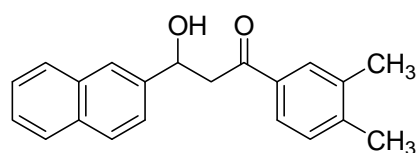

Follow the representative procedure I, isolated by column chromatography (EtOAc/hexanes = 1:20,  $R_f = 0.12$ );  $^1\text{H}$  NMR ( $\text{CDCl}_3$ , 400MHz):  $\delta$  7.92-7.82 (m, 4H), 7.44-7.69 (m, 2H), 7.55 (dd,  $J=8.4, 1.6$  Hz, 1H), 7.52-7.46 (m, 2H), 7.21 (d,  $J=8.0$  Hz, 1H), 5.51 (dd,  $J=6.8, 4.4$ , 1H), 3.90 (br, s, 1H), 3.45 (dd,  $J=17.6, 4.0$  Hz, 1H), 3.40 (dd,  $J=17.6, 8.0$  Hz, 1H), 2.32 (s, 3H), 2.31 (s, 3H);  $^{13}\text{C}$  NMR ( $\text{CDCl}_3$ , 100MHz):  $\delta$  200.1, 143.3, 140.4, 137.0, 134.4, 133.3, 132.9, 129.9, 129.2, 128.3, 127.9, 127.6, 126.1, 125.9, 125.8, 124.4, 123.9, 70.2, 47.1, 20.0, 19.7; M.W. ( $\text{C}_{21}\text{H}_{20}\text{O}_2$ ) 304.4; MS (EI, 20 eV): 304 ( $\text{M}^+$ , 77), 2869 (M- $\text{H}_2\text{O}$ , 12), 156 (100), 133 (61); HRMS(EI) calcd for  $\text{C}_{21}\text{H}_{20}\text{O}_2(\text{M}^+\text{+Na})$ : 327.1361; found: 327.1356.

### 3-(4-Bromophenyl)-3-hydroxy-1-(3,4-dimethylphenyl)propan-1-one (3p)<sup>7</sup>

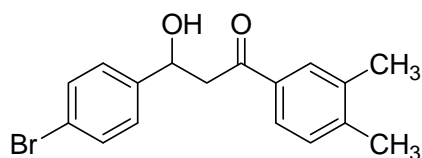

Follow the representative procedure I, isolated by column chromatography (EtOAc/hexanes = 1:20,  $R_f = 0.13$ );  $^1\text{H}$  NMR ( $\text{CDCl}_3$ , 400MHz):  $\delta$

7.71-7.65 (m, 2H), 7.35 (dt,  $J=9.2$ , 2.4 Hz, 2H), 7.20 (dt,  $J=8.8$ , 2.0 Hz, 1H), 7.21 (d,  $J=7.6$  Hz, 1H), 5.28 (dd,  $J=8.4$ , 3.2, 1H), 3.81 (br, s, 1H), 3.33 (dd,  $J=17.6$ , 3.6 Hz, 1H), 3.25 (dd,  $J=17.6$ , 8.4 Hz, 1H), 2.32 (s, 3H), 2.31 (s, 3H);  $^{13}\text{C}$  NMR ( $\text{CDCl}_3$ , 100MHz):  $\delta$  199.9, 143.5, 142.1, 137.1, 134.3, 131.6, 129.9, 129.2, 127.5, 125.9, 121.3, 69.5, 47.0, 20.1, 19.7.; M.W. ( $\text{C}_{17}\text{H}_{17}\text{BrO}_2$ ) 332.2; MS (EI, 20 eV); 334 ( $\text{M}+2$ , 70), 332 ( $\text{M}^+$ , 13), 314 ( $\text{M}-\text{H}_2\text{O}$ , 12), 198 (100), 133 (56).

### 3-Hydroxy-3-(4-methoxyphenyl)-1-(3, 4-dimethylphenyl)propan-1-one (3q)<sup>7</sup>

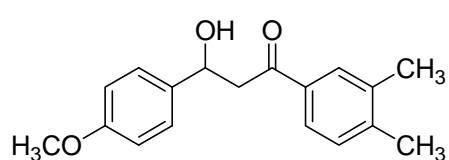

Follow the representative procedure I, isolated by column chromatography (EtOAc/hexanes = 1:20,  $R_f = 0.1$ ). The title compound was obtained as a colorless oil.  $^1\text{H}$  NMR ( $\text{CDCl}_3$ , 400MHz):  $\delta$  7.72-7.68 (m, 2H), 7.35 (d,  $J=8.0$  Hz, 2H), 7.20 (d,  $J=7.6$  Hz, 1H), 6.91 (d,  $J=8.0$  Hz, 2H), 5.27 (t,  $J=7.2$  1H), 3.81 (s, 3H), 3.68 (br, s, 1H), 2.31 (s, 3H), 2.30 (s, 3H);  $^{13}\text{C}$  NMR ( $\text{CDCl}_3$ , 100MHz):  $\delta$  200.2, 159.0, 143.3, 137.0, 135.2, 134.5, 129.9, 129.2, 127.0, 125.9, 113.9, 69.7, 55.3, 47.1, 29.7, 20.0, 19.7; M.W. ( $\text{C}_{18}\text{H}_{20}\text{O}_3$ ) 284.4; MS (EI, 20 eV): 284 ( $\text{M}^+$ , 72), 266 ( $\text{M}-\text{H}_2\text{O}$ , 7), 151 (100), 133 (63).

### 3-Hydroxy-3-phenyl-1-p-tolylbutan-1-one (3r)

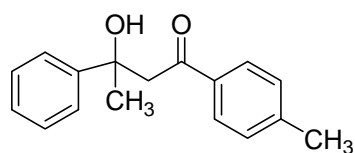

Follow the representative procedure I, isolated by column chromatography (EtOAc/hexanes = 1:40,  $R_f = 0.13$ ). The title compound was obtained as a pale yellow solid, Mp: 55-56 °C (ether/hexane);  $^1\text{H}$  NMR ( $\text{CDCl}_3$ , 400MHz):  $\delta$  7.81 (d,  $J=8.4$  Hz, 2H), 7.50 (d,  $J=8.4$  Hz, 2H), 7.34-7.19 (m, 5H), 5.01 (s, 1H), 3.77 (d,  $J=17.2$ , 1H), 3.32 (d,  $J=17.2$  Hz, 1H), 2.41 (s, 3H), 1.63 (s, 3H);  $^{13}\text{C}$  NMR ( $\text{CDCl}_3$ ,

100MHz):  $\delta$  201.0, 147.6, 144.6, 134.4, 129.3, 128.2, 128.15, 126.6, 124.3, 73.5,

[7] K.-M. Qiu, R. Yan, M. Xing, H.-H. Wang, H.-E. Cui, H.-L. Zhu, H.-B. Gong, *Bioorg. & Med. Chem.* **2012**, *20*, 6648

48.4, 30.9, 21.6; M.W. ( $C_{17}H_{18}O_2$ ) 254.3; MS (EI, 20 eV): 255 (M+1, 2), 239 (M-H<sub>2</sub>O, 25), 134(100), 119 (57); HRMS(ESI) calcd for  $C_{17}H_{18}O_2(M^+Na)$ : 277.1205; found: 277.1196.

### 3-Hydroxy-3, 3-diphenyl-1-p-tolylpropan-1-one (3s)<sup>8</sup>

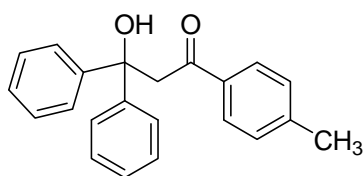

Follow the representative procedure I, isolated by column chromatography (EtOAc/hexanes = 1:40,  $R_f$  = 0.15). The title compound was obtained as a pale yellow solid, Mp: 122-124 °C (ether/hexane); <sup>1</sup>H NMR ( $CDCl_3$ , 400MHz):  $\delta$  7.82 (d,  $J=8.4$  Hz, 2H), 7.42-7.34 (m, 4H), 7.28-7.14 (m, 8H), 5.56 (s, 1H), 3.87 (s, 2H), 2.39 (s, 3H); <sup>13</sup>C NMR ( $CDCl_3$ , 100MHz):  $\delta$  200.6, 146.5, 129.7, 129.4, 128.8, 128.5, 128.19, 128.18, 128.0, 126.9, 125.7, 77.4, 48.0, 21.6; M.W. ( $C_{22}H_{20}O_2$ ) 316.4 ; MS (EI, 20 eV): 316 ( $M^+$ , 4), 298 (M-H<sub>2</sub>O, 42), 197 (100), 119 (60).

### syn-3-Hydroxy-2-methyl-3-phenyl-1-p-tolylpropan-1-one (3t)<sup>9</sup>

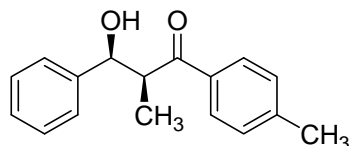

Follow the representative procedure I, isolated by column chromatography (EtOAc/hexanes = 1:20,  $R_f$  = 0.11). The title compound was obtained as a colorless oil. <sup>1</sup>H NMR ( $CDCl_3$ , 400MHz):  $\delta$  7.87 (d,  $J = 8.0$  Hz, 2H), 7.43-7.25 (m, 7H), 5.56 (dd,  $J = 8.0, 2.8$  Hz, 1H), 3.81 (quintet,  $J = 7.2$  Hz, 1H), 3.08 (d,  $J=4.0$  Hz, 1H), 2.41 (s, 3H), 1.07 (d,  $J=7.2$  Hz, 3H);

[8] M. Kamata, M. Kato, Y. Nishikata, *Chem. Commun.* **1996**, *21*, 2407.



[9] a) H.-J. Xu, X. Wan, S. Xu, Y.-Y. Shen, Y.-S. Feng, *Org. Lett.* **2012**, *14*, 1210; b) Y. Mei, D. J. Averill, M. J. Allen, *J. Org. Chem.* **2012**, *77*, 5624; c) H.-J. Xu, Y.-C. Liu, Y. Fu, Y.-D. Wu, *Org. Lett.* **2006**, *8*, 3449.

$^{13}\text{C}$  NMR ( $\text{CDCl}_3$ , 100MHz):  $\delta$  204.6, 144.2, 142.2, 134.2, 129.7, 129.3, 129.1, 129.07, 128.6, 128.5, 128.4, 127.8, 127.0, 126.7, 76.8, 47.8, 29.7, 21.6, 15.8; M.W. ( $\text{C}_{17}\text{H}_{18}\text{O}_2$ ) 254.3 ; MS (EI, 20 eV): 254( $\text{M}^+$ , 43), 237 (M- $\text{H}_2\text{O}$ , 11), 135 (100), 119 (78).

### ***syn*-3-*t*-Butylperoxy-2-methyl-3-phenyl-1-*p*-tolylpropan-1-one (3t')**

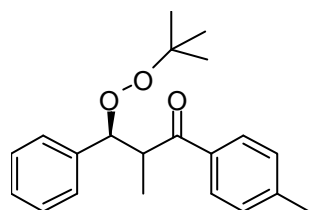

Follow the representative procedure I, isolated by column chromatography (EtOAc/hexanes = 1:20,  $R_f$  = 0.25). The title compound was obtained as a colorless oil.  $^1\text{H}$  NMR ( $\text{CDCl}_3$ , 400 MHz):  $\delta$  7.94 (d,  $J$  = 8.2 Hz, 2H), 7.83 (d,  $J$  = 8.2 Hz, 1H), 7.65 (d,  $J$  = 8.2 Hz, 2H), 7.38-7.34 (m, 3H), 7.32-7.28 (m, 3H), 7.22-7.18 (m, 4H), 7.14 (d,  $J$  = 8.0 Hz, 3H), 5.21 (d,  $J$  = 8.2 Hz, 1H), 5.16 (d,  $J$  = 9.6 Hz, 1H), 3.89 (dq,  $J$  = 6.9, 13.8 Hz, 1H), 3.78 (dq,  $J$  = 6.9, 13.8 Hz, 1H), 2.41 (s, 3H), 2.33 (s, 3H), 1.36 (d,  $J$  = 6.9 Hz, 3H), 1.15 (s, 9H), 0.98 (s, 9H), 0.85 (d,  $J$  = 6.9 Hz, 3H);  $^{13}\text{C}$  NMR (100 MHz,  $\text{CDCl}_3$ )  $\delta$  202.3, 201.0, 143.6, 143.5, 140.1, 139.3, 135.1, 134.1, 129.1, 129.1, 128.5, 128.3, 128.2, 128.0, 127.9, 127.6, 127.5, 127.3, 88.4, 86.4, 80.8, 80.4, 46.2, 44.5, 26.4, 26.2, 21.6, 21.5, 14.7, 14.6; HRMS (ESI) calcd for  $\text{C}_{21}\text{H}_{26}\text{O}_3$  ( $\text{M}^+$ +Na): 349.1780; found: 349.1779.

### **3,3-Dimethyl-1-phenylbutan-1-ol (3u)<sup>10</sup>**

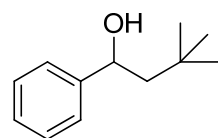

Follow the representative procedure I, isolated by column chromatography (EtOAc/hexanes = 1:20,  $R_f$  = 0.3). The title compound was obtained as a colorless oil.  $^1\text{H}$  NMR (400 MHz,  $\text{CDCl}_3$ ):  $\delta$  7.35 – 7.34

(m, 4H), 7.28 – 7.25 (m, 1H), 4.82 (dd,  $J = 3.6, 8.4$  Hz, 1H), 1.82 (s, br, OH), 1.77 (dd,  $J = 8.4, 14.5$  Hz, 1H), 1.61 (dd,  $J = 3.6, 14.5$  Hz, 1H), 1.00 (s, 9H);  $^{13}\text{C}$  NMR: (100 MHz,  $\text{CDCl}_3$ )  $\delta$  146.4, 128.4, 127.2, 125.7, 72.4, 52.8, 30.4, 30.1; M.W. ( $\text{C}_{12}\text{H}_{18}\text{O}$ ) 178.1 ; MS (EI, 70 eV): 178 ( $\text{M}^+$ , 1), 145 (2), 107 (100), 105 (18), 79 (69), 77 (29).

### 1,3-diphenylpropan-1-ol (3v)<sup>11</sup>

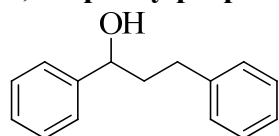

Follow the representative procedure I, isolated by column chromatography (EtOAc/hexanes = 1:20,  $R_f = 0.2$ ). The title compound was obtained as a colorless oil.  $^1\text{H}$  NMR (400 MHz,  $\text{CDCl}_3$ )  $\delta$  7.38-7.33 (m, 4H), 7.32-7.26 (m, 3H), 7.21-7.17 (m, 3H), 4.70 (dd,  $J = 5.4, 7.8$  Hz, 1H), 2.79-2.63 (m, 2H), 2.19-1.99 (m, 2H), 1.77 (s, br, 1H);  $^{13}\text{C}$  NMR (100 MHz,  $\text{CDCl}_3$ ):  $\delta$ (100 MHz,  $\text{CDCl}_3$ )  $\delta$  114.5, 141.7, 128.5, 128.4, 128.3, 127.6, 125.9, 125.8, 73.8, 40.4, 32.0; HRMS(ESI) calcd for  $\text{C}_{15}\text{H}_{16}\text{O}$  ( $\text{M}^+ + \text{Na}$ ): 235.1099; found: 235.1090.

- 
- [10] R. Scholz, G. Hellmann, S. Rohs, D. Özdemir, G. Raabe, C. Vermeeren, H. Gais, *Eur. J. Org. Chem.* **2010**, 4588.
- [11] a) J. Yang, X. Liu, D.-L. Meng, H.-Y. Chen, Z.-H. Zong, T.-T. Feng, K. Sun, *Adv. Synth. Catal.* **2012**, 354, 328; b) P. Satyanarayana, G. M. Reddy, H. Maheswaran, M. L. Kantam, *Adv. Synth. Catal.* **2013**, 355, 1859.

### Analytical data for $\beta$ -peroxyketones 4a-t, and 5

#### 3-(*tert*-Butylperoxy)-1,3-diphenylpropan-1-one (4a)<sup>12</sup>

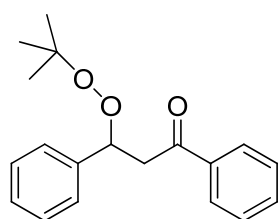

Follow the representative procedure II, isolated by column chromatography (EtOAc/hexanes = 1:20,  $R_f = 0.3$ ). The title compound was obtained as a colorless oil.  $^1\text{H}$  NMR (400 MHz,  $\text{CDCl}_3$ ):  $\delta$  7.96 (d,  $J = 7.1$  Hz, 2H), 7.56 (t,  $J = 7.4$  Hz, 1H), 7.47-7.42 (m, 4H), 7.35 (t,  $J = 7.1$  Hz, 2H), 7.31-7.28 (m, 1H), 5.60 (t,  $J = 6.7$  Hz,

1H), 3.78 (dd,  $J = 7.1, 16.3$  Hz, 1H), 3.22 (dd,  $J = 5.9, 16.2$  Hz, 1H), 1.17 (s, 9H);  $^{13}\text{C}$  NMR (100 MHz,  $\text{CDCl}_3$ ):  $\delta$  197.4, 139.9, 137.1, 133.0, 128.5, 128.3, 128.2, 128.1, 127.0, 82.3, 80.7, 43.9, 26.3; HRMS(ESI) calcd for  $\text{C}_{19}\text{H}_{22}\text{O}_3(\text{M}^+ + \text{Na})$ : 321.1467; found: 321.1463.

### 3-(*tert*-Butylperoxy)-3-phenyl-1-(*p*-tolyl)propan-1-one (4b)

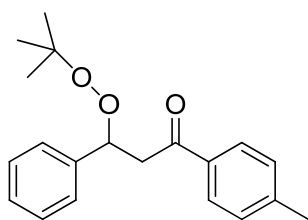

Follow the representative procedure II, isolated by column chromatography (EtOAc/hexanes = 1:20,  $R_f = 0.4$ ). The title compound was obtained as a colorless oil.  $^1\text{H}$  NMR (400 MHz,  $\text{CDCl}_3$ ):  $\delta$  7.88 (d,  $J = 8.1$  Hz, 2H), 7.46 (d,  $J = 7.4$  Hz, 2H), 7.37 (t,  $J = 6.9$  Hz, 2H), 7.33-7.31 (m, 1H), 7.28-7.26 (m, 2H), 5.62 (t,  $J = 6.6$  Hz, 1H), 3.77 (dd,  $J = 7.1, 16.2$  Hz, 1H), 3.21 (dd,  $J = 6.1, 16.2$  Hz, 1H), 2.44 (s, 3H), 1.19 (s, 9H);  $^{13}\text{C}$  NMR (100 MHz,  $\text{CDCl}_3$ ):  $\delta$  197.0, 143.8, 140.0, 134.6, 129.1, 128.3, 128.0, 127.0, 82.3, 80.7, 43.8, 26.3, 21.6; HRMS(ESI) calcd for  $\text{C}_{20}\text{H}_{24}\text{O}_3(\text{M}^+ + \text{Na})$ : 335.1623; found: 335.1617.

---

[12] W. Liu, Y. Li, K. Liu, Z. Li, *J. Am. Chem. Soc.* **2011**, *133*, 10756.

### 3-(*tert*-Butylperoxy)-3-phenyl-1-(*o*-tolyl)propan-1-one (4c)

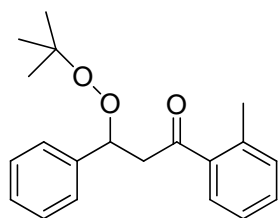

Follow the representative procedure II, isolated by column chromatography (EtOAc/hexanes = 1:20,  $R_f = 0.4$ ). The title compound was obtained as a colorless oil.  $^1\text{H}$  NMR (400 MHz,  $\text{CDCl}_3$ ):  $\delta$  7.63 (d,  $J = 7.8$  Hz, 1H), 7.40 (d,  $J = 6.8$  Hz, 2H), 7.38-7.32 (m, 3H), 7.31-7.7.28 (m, 1H), 7.27-7.21 (m, 2H), 5.56 (dd,  $J = 6.0, 7.3$  Hz, 1H), 3.67 (dd,  $J = 7.4, 16.2$  Hz, 1H), 3.16 (dd,  $J = 6.0, 16.2$  Hz, 1H), 2.41 (s, 3H),

1.19 (s, 9H);  $^{13}\text{C}$  NMR (100 MHz,  $\text{CDCl}_3$ )  $\delta$  201.2, 139.9, 138.1, 138.0, 131.8, 131.2, 128.5, 128.3, 128.0, 127.1, 125.5, 82.2, 80.7, 46.9, 26.3, 21.0; HRMS(ESI) calcd for  $\text{C}_{20}\text{H}_{24}\text{O}_3(\text{M}^+ + \text{Na})$ : 335.1623; found: 335.1618.

### 3-(*tert*-Butylperoxy)-1-(4-methoxyphenyl)-3-phenylpropan-1-one (4d)

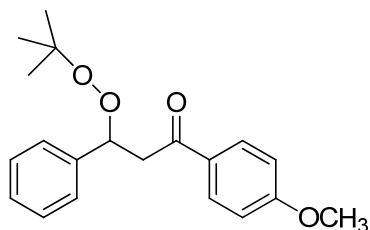

Follow the representative procedure II, isolated by column chromatography (EtOAc/hexanes = 1:20,  $R_f$  = 0.4). The title compound was obtained as a colorless oil.

$^1\text{H}$  NMR (400 MHz,  $\text{CDCl}_3$ ):  $\delta$  7.94 (d,  $J$  = 8.9 Hz, 2H), 7.43 (d,  $J$  = 8.5 Hz, 2H), 7.36-7.32 (m, 2H), 7.31-7.28 (m, 1H), 6.92 (d,  $J$  = 8.9 Hz, 2H), 5.58 (t,  $J$  = 6.5 Hz, 1H), 3.87 (s, 3H), 3.72 (dd,  $J$  = 7.1, 16.0 Hz, 1H), 3.16 (dd,  $J$  = 6.0, 16.0 Hz, 1H), 1.17 (s, 3H);  $^{13}\text{C}$  NMR (100 MHz,  $\text{CDCl}_3$ ):  $\delta$  195.8, 163.4, 140.1, 130.5, 130.2, 128.3, 127.9, 127.0, 113.6, 82.4, 80.7, 55.4, 43.57, 26.3; HRMS(ESI) calcd for  $\text{C}_{20}\text{H}_{24}\text{O}_4(\text{M}^+ + \text{Na})$ : 351.1573; found: 351.1567.

### 3-(*tert*-Butylperoxy)-1-(4-chlorophenyl)-3-phenylpropan-1-one (4e)

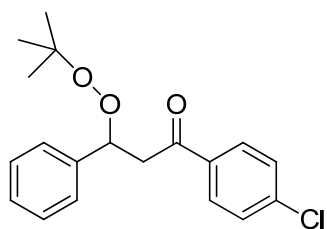

Follow the representative procedure II, isolated by column chromatography (EtOAc/hexanes = 1:20,  $R_f$  = 0.4). The title compound was obtained as a colorless oil.  $^1\text{H}$  NMR (400 MHz,  $\text{CDCl}_3$ ):  $\delta$  7.90 (d,  $J$  = 8.6 Hz, 2H), 7.43-7.7.41 (m, 4H), 7.36 (t,  $J$  = 6.9 Hz, 2H), 7.32-7.30 (m, 1H), 5.57 (dd,  $J$  = 6.0, 7.0 Hz, 1H), 3.75 (dd,  $J$  = 7.2, 16.0 Hz, 1H), 3.16 (dd,  $J$  = 5.8, 16.0 Hz, 1H), 1.16 (s, 9H);  $^{13}\text{C}$  NMR (100 MHz,  $\text{CDCl}_3$ ):  $\delta$  196.3, 139.7, 139.5, 135.4, 129.6, 128.8, 128.4, 128.2, 127.0, 82.3, 80.8, 43.9, 26.3; HRMS(ESI) calcd for  $\text{C}_{19}\text{H}_{21}\text{ClO}_3(\text{M}^+ + \text{Na})$ : 355.1077; found: 355.1070.

### 3-(*tert*-Butylperoxy)-1-(3-chlorophenyl)-3-phenylpropan-1-one (4f)

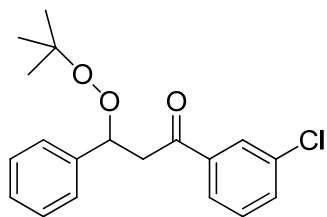

Follow the representative procedure II, isolated by column chromatography (EtOAc/hexanes = 1:20,  $R_f$  = 0.4). The title compound was obtained as a colorless oil.  $^1\text{H}$  NMR (400 MHz,  $\text{CDCl}_3$ ):  $\delta$  7.94 (t,  $J$  = 2.0 Hz, 1H), 7.83 (d,  $J$  = 7.8 Hz, 1H), 7.53 (d,  $J$  = 7.8 Hz, 1H), 7.44-7.40 (m, 3H), 7.36 (dt,  $J$  = 1.4, 8.3 Hz, 2H), 7.33-7.28 (m, 1H), 5.57 (dd,  $J$  = 5.8, 7.1 Hz, 1H), 3.76 (dd,  $J$  = 7.2, 16.2 Hz, 1H), 3.17 (dd,  $J$  = 5.8, 16.2 Hz, 1H), 1.16 (s, 9H);  $^{13}\text{C}$  NMR (100 MHz,  $\text{CDCl}_3$ ):  $\delta$  196.3, 139.6, 138.6, 134.8, 132.9, 129.8, 128.4, 128.2, 127.0, 126.3, 82.2, 80.8, 44.1, 26.3; HRMS(ESI) calcd for  $\text{C}_{19}\text{H}_{21}\text{ClO}_3$  ( $\text{M}^+$ +Na): 355.1077; found: 355.1073.

### 3-(*tert*-Butylperoxy)-1-(4-bromophenyl)-3-phenylpropan-1-one (4g)

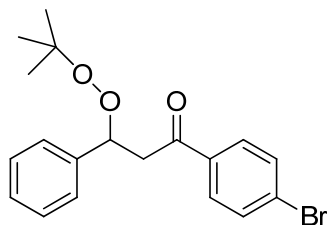

Follow the representative procedure II, isolated by column chromatography (EtOAc/hexanes = 1:20,  $R_f$  = 0.4). The title compound was obtained as a colorless oil.  $^1\text{H}$  NMR (400 MHz,  $\text{CDCl}_3$ ):  $\delta$  7.82 (d,  $J$  = 8.8 Hz, 2H), 7.59 (d,  $J$  = 8.8 Hz, 2H), 7.42 (dd,  $J$  = 1.7, 8.4 Hz, 2H), 7.38-7.34 (m, 2H), 7.32-7.28 (m, 1H), 5.57 (dd,  $J$  = 5.8, 7.2 Hz, 1H), 3.74 (dd,  $J$  = 7.2, 16.1 Hz, 1H), 3.16 (dd,  $J$  = 5.7, 16.1 Hz, 1H), 1.16 (s, 9H);  $^{13}\text{C}$  NMR (100 MHz,  $\text{CDCl}_3$ ):  $\delta$  196.5, 139.6, 135.8, 131.8, 129.7, 128.4, 128.2, 128.2, 127.0, 82.3, 80.8, 43.9, 26.3; HRMS(ESI) calcd for  $\text{C}_{19}\text{H}_{21}\text{BrO}_3$  ( $\text{M}^+$ +Na): 399.0572; found: 399.0567.

### 3-(*tert*-Butylperoxy)-1-(naphthalen-1-yl)-3-phenylpropan-1-one (4h)

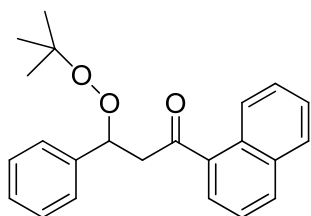

Follow the representative procedure II, isolated by column

chromatography (EtOAc/hexanes = 1:10,  $R_f$  = 0.4). The title compound was obtained as a colorless oil.  $^1\text{H}$  NMR (400 MHz,  $\text{CDCl}_3$ ):  $\delta$  8.51 (d,  $J$  = 8.0 Hz, 1H), 7.98 (d,  $J$  = 8.4 Hz, 1H), 7.88 (dt,  $J$  = 1.4, 7.3 Hz, 2H), 7.57-7.48 (m, 3H), 7.45-7.43 (m, 2H), 7.38-7.31 (m, 3H), 5.68 (dd,  $J$  = 5.5, 7.7 Hz, 1H), 3.84 (dd,  $J$  = 7.7, 16.0 Hz, 1H), 3.30 (dd,  $J$  = 5.5, 16.0 Hz, 1H), 1.19 (s, 9H);  $^{13}\text{C}$  NMR (100 MHz,  $\text{CDCl}_3$ ):  $\delta$  201.2, 139.9, 136.0, 133.8, 132.7, 130.0, 128.4, 128.3, 128.1, 127.8 (x2), 127.1, 126.4, 125.8, 124.2, 82.4, 80.7, 47.6, 26.3; HRMS(ESI) calcd for  $\text{C}_{23}\text{H}_{24}\text{O}_3$  ( $\text{M}^+\text{Na}$ ): 371.1623; found: 371.1615.

### 3-(*tert*-Butylperoxy)-1-(thiophen-2-yl)-3-phenylpropan-1-one (4i)<sup>12</sup>

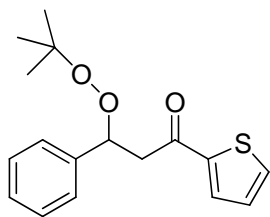

Follow the representative procedure II, isolated by column chromatography (EtOAc/hexanes = 1:20,  $R_f$  = 0.4). The title compound was obtained as a pale yellow solid.  $^1\text{H}$  NMR (400 MHz,  $\text{CDCl}_3$ ):  $\delta$  7.73 (dd,  $J$  = 0.4, 3.9 Hz, 1H), 7.63 (dd,  $J$  = 0.4, 4.9 Hz, 1H), 7.43 (d,  $J$  = 6.9 Hz, 2H), 7.36 (t,  $J$  = 6.9 Hz, 2H), 7.32-7.28 (m, 1H), 7.12 (dd,  $J$  = 4.0, 4.9 Hz, 1H), 5.57 (dd,  $J$  = 5.7, 7.4 Hz, 1H), 3.67 (dd,  $J$  = 7.5, 15.6 Hz, 1H), 3.14 (dd,  $J$  = 5.7, 15.6 Hz, 1H), 1.16 (s, 9H);  $^{13}\text{C}$  NMR (100 MHz,  $\text{CDCl}_3$ ):  $\delta$  190.1, 144.5, 139.7, 133.8, 132.2, 128.4, 128.1, 128.0, 126.9, 82.2, 80.8, 44.9, 26.2; HRMS(ESI) calcd for  $\text{C}_{17}\text{H}_{20}\text{O}_3\text{S}$  ( $\text{M}^+\text{Na}$ ): 327.1031; found: 327.1023.

### 3-(*tert*-Butylperoxy)-1-(furan-2-yl)-3-phenylpropan-1-one (4j)<sup>12</sup>

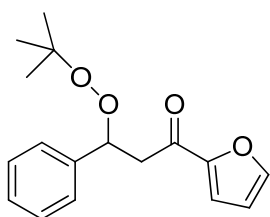

Follow the representative procedure II, isolated by column chromatography (EtOAc/hexanes = 1:20,  $R_f$  = 0.4). The title compound was obtained as a colorless oil.  $^1\text{H}$  NMR (400 MHz,  $\text{CDCl}_3$ ):  $\delta$  7.58 (d,  $J$  = 1.2 Hz, 1H), 7.43-7.41 (m, 2H),

7.37-7.33 (m, 2H), 7.31-7.27 (m, 1H), 7.19 (d,  $J = 3.6$  Hz, 1H), 6.52 (dd,  $J = 1.6, 3.6$  Hz, 1H), 5.57 (dd,  $J = 5.4, 12.0$  Hz, 1H), 3.60 (dd,  $J = 8.0, 15.6$  Hz, 1H), 3.04 (dd,  $J = 5.4, 15.6$  Hz, 1H), 1.15 (s, 9H);  $^{13}\text{C}$  NMR (100 MHz,  $\text{CDCl}_3$ ):  $\delta$  186.2, 152.8, 146.4, 139.7, 128.4, 128.1, 127.0, 117.4, 112.2, 82.0, 80.8, 44.1, 26.2; HRMS(ESI) calcd for  $\text{C}_{17}\text{H}_{20}\text{O}_4$  ( $\text{M}^+ + \text{Na}$ ): 311.126; found: 311.1252.

### 3-(*tert*-Butylperoxy)-1-cyclohexyl-3-phenylpropan-1-one (4k)

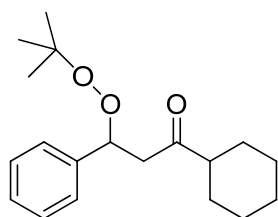

Follow the representative procedure II, isolated by column chromatography (EtOAc/hexanes = 1:5,  $R_f = 0.6$ ). The title compound was obtained as a colorless oil.  $^1\text{H}$  NMR (400 MHz,  $\text{CDCl}_3$ ):  $\delta$  7.36-7.31 (m, 4H), 7.30-7.28 (m, 1H), 5.42 (dd,  $J = 5.5, 7.7$  Hz, 1H), 3.15 (dd,  $J = 7.7, 16.2$  Hz, 1H), 2.68 (dd,  $J = 5.5, 16.2$  Hz, 1H), 2.34-2.30 (m, 1H), 1.86-1.58 (m, 10H), 1.19 (s, 9H);  $^{13}\text{C}$  NMR (100 MHz,  $\text{CDCl}_3$ ):  $\delta$  210.9, 140.1, 128.3, 127.9, 126.9, 81.9, 80.7, 51.4, 46.0, 28.0, 28.0, 26.3, 25.8, 25.6, 25.5; HRMS(ESI) calcd for  $\text{C}_{19}\text{H}_{28}\text{O}_3$  ( $\text{M}^+ + \text{Na}$ ): 327.1936; found: 327.1930.

### 3-(*tert*-Butylperoxy)-1-(2,4-dimethylphenyl)-3-phenylpropan-1-one (4l)

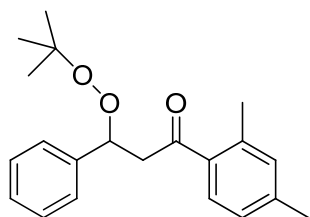

Follow the representative procedure II, isolated by column chromatography (EtOAc/hexanes = 1:20,  $R_f = 0.45$ ). The title compound was obtained as a colorless oil.  $^1\text{H}$  NMR (400 MHz,  $\text{CDCl}_3$ ):  $\delta$  7.58 (d,  $J = 7.8$  Hz, 1H), 7.41-7.38 (m, 2H), 7.36-7.32 (m, 2H), 7.30-7.29 (m, 1H), 7.05-7.03 (m, 2H), 5.55 (dd,  $J = 6.2, 7.2$  Hz, 1H), 3.66 (dd,  $J = 7.4, 16.0$  Hz, 1H), 3.14 (dd,  $J = 6.0, 16.0$  Hz, 1H), 2.41 (s, 3H), 2.35 (s, 3H), 1.19 (s, 9H);  $^{13}\text{C}$  NMR (100 MHz,  $\text{CDCl}_3$ ):  $\delta$  200.4, 141.9, 140.0, 138.6,

135.0, 132.7, 129.1, 128.3, 128.0, 127.1, 126.2, 82.3, 80.6, 46.6, 26.3, 21.3, 21.2;  
HRMS(ESI) calcd for C<sub>21</sub>H<sub>26</sub>O<sub>3</sub> (M<sup>+</sup>+Na): 349.178; found: 349.1774.

### 3-(*tert*-Butylperoxy)-1-(2,4-dimethylphenyl)-3-(*p*-tolyl)propan-1-one (4m)

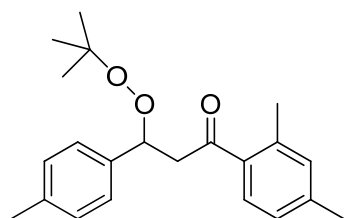

Follow the representative procedure II, isolated by column chromatography (EtOAc/hexanes = 1:20, R<sub>f</sub> = 0.45). The title compound was obtained as a colorless oil.

<sup>1</sup>H NMR (400 MHz, CDCl<sub>3</sub>): δ 7.60 (d, *J* = 7.9 Hz, 1H), 7.29 (d, *J* = 7.8 Hz, 2H), 7.15 (d, *J* = 7.8 Hz, 2H), 7.06 (d, *J* = 7.9 Hz, 1H), 7.03 (s, 1H), 5.52 (t, *J* = 6.6 Hz, 1H), 3.67 (dd, *J* = 7.2, 16.0 Hz, 1H), 3.14 (dd, *J* = 6.1, 16.0 Hz, 1H), 2.41 (s, 3H), 2.35 (s, 3H), 2.34 (s, 3H), 1.17 (s, 9H); <sup>13</sup>C NMR (100 MHz, CDCl<sub>3</sub>): δ 200.6, 141.8, 138.6, 137.7, 136.8, 135.0, 132.7, 129.2, 129.0, 127.1, 126.2, 82.2, 80.6, 46.5, 26.3, 21.3, 21.3, 21.1; HRMS(ESI) calcd for C<sub>22</sub>H<sub>28</sub>O<sub>3</sub> (M<sup>+</sup>+Na): 363.1936; found: 363.1930.

### 3-(*tert*-Butylperoxy)-1-(2,4-dimethylphenyl)-3-(4-methoxyphenyl)propan-1-one (4n)

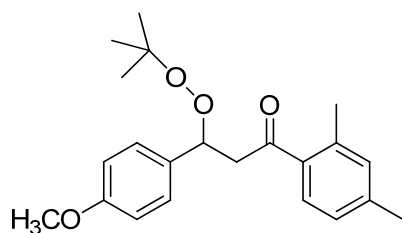

Follow the representative procedure II, isolated by column chromatography (EtOAc/hexanes = 1:20, R<sub>f</sub> = 0.4). The title compound was obtained as a colorless oil. <sup>1</sup>H NMR (400 MHz, CDCl<sub>3</sub>): δ 7.60 (d,

*J* = 8.0 Hz, 1H), 7.32 (d, *J* = 8.7 Hz, 2H), 7.06 (d, *J* = 8.0 Hz, 1H), 7.03 (s, 1H), 6.87 (d, *J* = 8.7 Hz, 2H), 5.50 (t, *J* = 6.7 Hz, 1H), 3.79 (s, 3H), 3.70 (dd, *J* = 7.0, 16.0 Hz, 1H), 3.17 (dd, *J* = 6.5, 16.0 Hz, 1H), 2.40 (s, 3H), 2.35 (s, 3H), 1.19 (s, 9H); <sup>13</sup>C NMR (100 MHz, CDCl<sub>3</sub>): δ 200.6, 159.3, 141.8, 138.6, 135.0, 132.7, 131.7, 129.1, 128.5,



126.1, 113.6, 82.0, 80.5, 55.1, 46.3, 26.3, 21.3, 21.2; HRMS(ESI) calcd for C<sub>22</sub>H<sub>28</sub>O<sub>4</sub> (M<sup>+</sup>+Na): 379.1886; found: 379.1880.

### 3-(*tert*-Butylperoxy)-3-(4-bromophenyl)-1-(2,4-dimethylphenyl)propan-1-one

(4o)

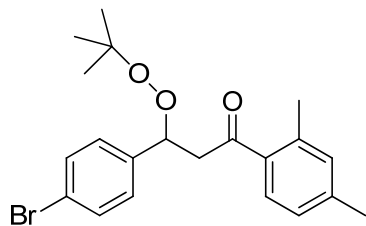

Follow the representative procedure II, isolated by column chromatography (EtOAc/hexanes = 1:20, R<sub>f</sub> = 0.4). The title compound was obtained as a colorless oil.

<sup>1</sup>H NMR (400 MHz, CDCl<sub>3</sub>): δ 7.57 (d, *J* = 8.0 Hz, 1H), 7.48-7.45 (m, 2H), 7.30-7.27 (m, 2H), 7.07-7.04 (m, 2H), 5.51 (t, *J* = 6.8 Hz, 1H), 3.60 (dd, *J* = 7.3, 16.2 Hz, 1H), 3.09 (dd, *J* = 6.1, 16.2 Hz, 1H), 2.42 (s, 3H), 2.35 (s, 3H), 1.17 (s, 9H); <sup>13</sup>C NMR (100 MHz, CDCl<sub>3</sub>): δ 199.8, 142.1, 139.3, 138.7, 134.7, 132.8, 131.4, 129.1, 128.8, 126.2, 121.8, 81.6, 80.7, 46.3, 26.3, 21.3; HRMS(ESI) calcd for C<sub>21</sub>H<sub>25</sub>BrO<sub>3</sub> (M<sup>+</sup>+Na): 427.0885; found: 427.0877.

### 3-(*tert*-Butylperoxy)-1-(2,4-dimethylphenyl)-3-(naphthalen-2-yl)propan-1-one

(4p)

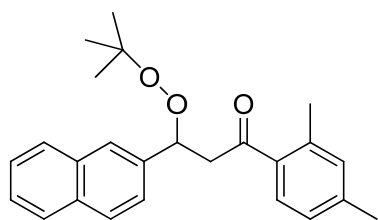

Follow the representative procedure II, isolated by column chromatography (EtOAc/hexanes = 1:20, R<sub>f</sub> = 0.36). The title compound was obtained as a colorless oil. <sup>1</sup>H NMR (400 MHz, CDCl<sub>3</sub>): δ 7.85-7.80 (m, 4H),

7.61 (d, *J* = 8.0 Hz, 1H), 7.55 (dd, *J* = 1.5, 8.7 Hz, 1H), 7.50-7.44 (m, 2H), 7.07-7.03 (m, 2H), 5.73 (dd, *J* = 5.9, 7.4 Hz, 1H), 3.73 (dd, *J* = 7.5, 16.1 Hz, 1H), 3.22 (dd, *J* = 5.8, 16.1 Hz, 1H), 2.41 (s, 3H), 2.35 (s, 3H), 1.20 (s, 9H); <sup>13</sup>C NMR (100 MHz, CDCl<sub>3</sub>): δ 200.3, 141.9, 138.7, 137.6, 135.0, 133.2, 133.1, 132.7, 129.2, 128.1, 128.0,

127.6, 126.2, 126.0, 125.9, 124.8, 82.4, 80.7, 46.6, 26.4, 21.3, 21.3; HRMS(ESI) calcd for C<sub>25</sub>H<sub>28</sub>O<sub>3</sub> (M<sup>+</sup>+Na): 399.1936; found: 399.1927.

### 3-(*tert*-Butylperoxy)-3-phenyl-1-(*p*-tolyl)butan-1-one (4q)

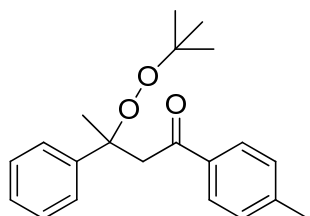

Follow the representative procedure II, isolated by column chromatography (EtOAc/hexanes = 1:20, R<sub>f</sub> = 0.4). The title compound was obtained as a colorless oil. <sup>1</sup>H NMR (400 MHz, CDCl<sub>3</sub>): δ 7.83 (d, *J* = 8.3 Hz, 2H), 7.49 (dd, *J* = 1.4, 8.7 Hz, 2H), 7.32 (t, *J* = 7.2 Hz, 2H), 7.26-7.23 (m, 1H), 7.22-7.20 (m, 2H), 3.63 (d, *J* = 14.5 Hz, 1H), 3.29 (d, *J* = 14.5 Hz, 1H), 2.39 (s, 3H), 1.84 (s, 3H), 1.10 (s, 9H); <sup>13</sup>C NMR (100 MHz, CDCl<sub>3</sub>): δ 197.4, 144.5, 143.4, 135.6, 128.9, 128.7, 127.9, 127.0, 125.7, 83.0, 79.2, 48.1, 26.5, 23.5, 21.6; HRMS(ESI) calcd for C<sub>21</sub>H<sub>26</sub>O<sub>3</sub> (M<sup>+</sup>+Na): 349.178; found: 349.1767.

### 3-(*tert*-Butylperoxy)-3,3-diphenyl-1-(*p*-tolyl)propan-1-one (4r)

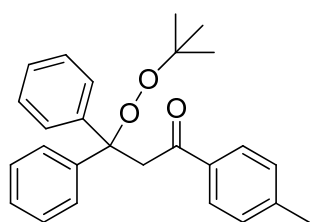

Follow the representative procedure II, isolated by column chromatography (EtOAc/hexanes = 1:20, R<sub>f</sub> = 0.4). The title compound was obtained as a colorless oil. <sup>1</sup>H NMR (400 MHz, CDCl<sub>3</sub>): δ 7.84 (d, *J* = 8.6 Hz, 2H), 7.40-7.38 (m, 4H), 7.31-7.26 (m, 4H), 7.25-7.22 (m, 2H), 7.21-7.19 (m, 2H), 4.16 (s, 2H), 2.39 (s, 3H), 1.06 (s, 9H); <sup>13</sup>C NMR (100 MHz, CDCl<sub>3</sub>): δ 196.6, 143.7, 143.2, 135.8, 128.8, 128.5, 127.5, 127.3, 127.0, 86.2, 79.6, 44.6, 26.4, 21.5; HRMS(ESI) calcd for C<sub>26</sub>H<sub>28</sub>O<sub>3</sub> (M<sup>+</sup>+Na): 411.1936; found: 411.1930.

### 3-(*tert*-Butylperoxy)-1-(4-chlorophenyl)-3,3-diphenylpropan-1-one (4s)

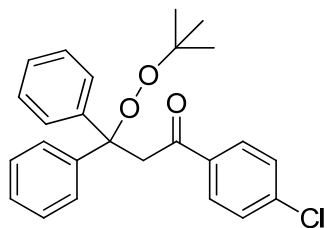

Follow the representative procedure II, isolated by column chromatography (EtOAc/hexanes = 1:20,  $R_f$  = 0.4). The title compound was obtained as a colorless oil.  $^1\text{H}$  NMR (400 MHz,  $\text{CDCl}_3$ ):  $\delta$  7.85 (d,  $J$  = 8.6 Hz, 1H), 7.36-7.33 (m, 6H), 7.30-7.29 (m, 1H), 7.28-7.26 (m, 3H), 7.25-7.23 (m, 1H), 4.12 (s, 2H), 1.03 (s, 9H);  $^{13}\text{C}$  NMR (100 MHz,  $\text{CDCl}_3$ ):  $\delta$  196.1, 143.4, 138.9, 136.7, 129.9, 128.4, 127.5, 127.2, 127.1, 86.2, 79.9, 44.8, 26.4; HRMS(ESI) calcd for  $\text{C}_{25}\text{H}_{25}\text{ClO}_3$  ( $\text{M}^+ + \text{Na}$ ): 431.139; found: 431.1383.

#### 4-(2-(tert-Butylperoxy)-2-phenylpropyl)-2,2-dimethyl-1,3-dioxolane (4t)

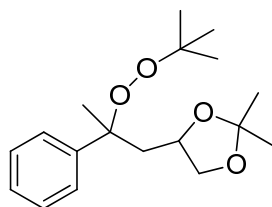

Follow the representative procedure II, isolated by column chromatography (EtOAc/hexanes = 1:20,  $R_f$  = 0.5). The title compound was obtained as a colorless oil.  $^1\text{H}$  NMR (400 MHz,  $\text{CDCl}_3$ ):  $\delta$  7.39 (t,  $J$  = 7.3 Hz, 4H), 7.34 (d,  $J$  = 7.3 Hz, 2H), 7.30 (d,  $J$  = 7.7 Hz, 2H), 7.24 - 7.21 (m, 2H), 4.32 - 4.26 (m, 1H), 3.97 (dd,  $J$  = 5.6, 8.2 Hz, 1H), 3.76 (dd, ;  $J$  = 5.7, 8.2 Hz, 1H), 3.74 - 3.68 (m, 1H), 3.57 (t,  $J$  = 8.1 Hz, 1H), 3.27 (t,  $J$  = 8.0 Hz, 1H), 2.32 - 2.28 (m, 2H), 2.16 (dd,  $J$  = 9.0, 14.0 Hz, 1H), 2.04 (dd,  $J$  = 7.9, 14.3 Hz, 1H), 1.67 (s, 3H), 1.66 (s, 3H), 1.36 (s, 3H), 1.35 (s, 3H), 1.33 (s, 3H), 1.27 (s, 9H), 1.24 (s, 9H), 1.23 (s, 3H);  $^{13}\text{C}$  NMR (100 MHz,  $\text{CDCl}_3$ ):  $\delta$  145.5, 143.9, 128.0, 127.9, 126.8, 126.7, 125.4, 125.4, 107.7, 107.4, 82.5, 82.0, 79.2, 79.0, 72.9, 72.7, 70.4, 70.2, 44.8, 44.2, 26.8, 26.7, 26.7, 26.0, 25.8, 25.8, 24.3; HRMS(ESI) calcd for  $\text{C}_{18}\text{H}_{28}\text{O}_4$  ( $\text{M}^+ + \text{Na}$ ): 331.1879; found: 331.1876.

#### Di-tert-butyl 1-benzoylhydrazine-1,2-dicarboxylate (5)

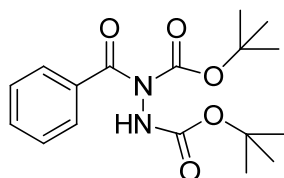

$^1\text{H}$  NMR (400 MHz,  $\text{CDCl}_3$ )  $\delta$  7.71 - 7.67 (m, 2H), 7.50 (t,  $J$  = 7.4 Hz, 1H), 7.40 (t,  $J$  = 7.8 Hz, 2H), 6.79 (s, br, NH),

1.49 (s, 9H), 1.22 (s, br, 9H);  $^{13}\text{C}$  NMR (100 MHz,  $\text{CDCl}_3$ )  $\delta$  154.5, 151.7, 131.7, 128.1, 128.0, 84.4, 82.2, 28.1, 27.3; HRMS(ESI) calcd for  $\text{C}_{17}\text{H}_{24}\text{N}_2\text{O}_5(\text{M}^++\text{Na})$ : 359.1577; found: 359.1583;  $R_f = 0.55$  (EtOAc/hexanes = 3:7).

### ESI mass spectrum of vanadyl hydroxo complex **8** ( $\text{VO}(\text{acac})_2\text{-OH}$ )

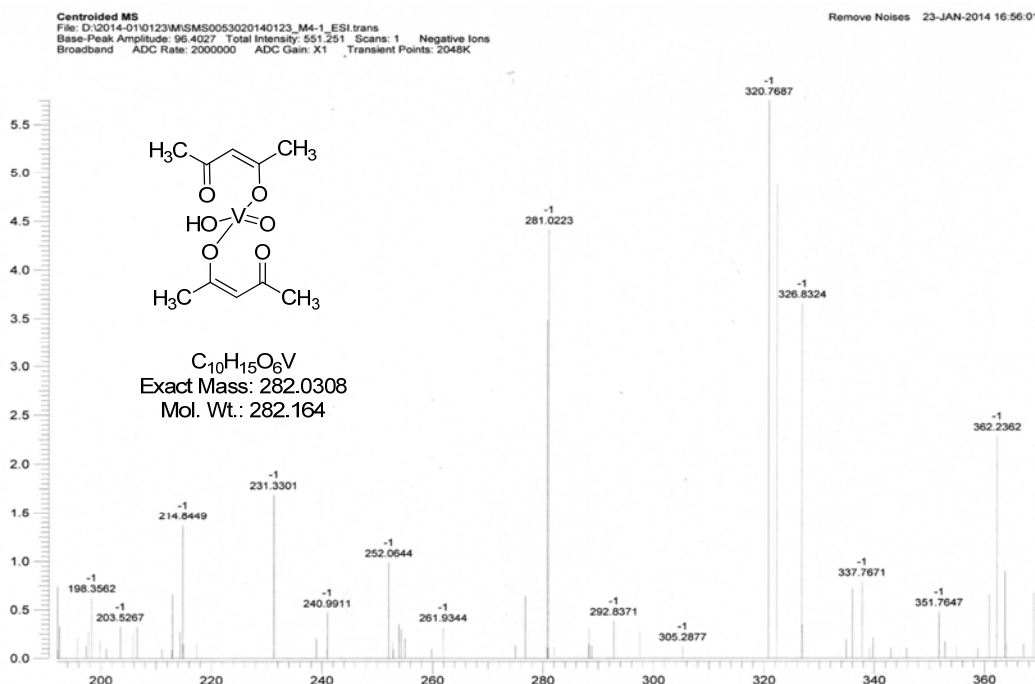

### Cross dioxygenation of $\alpha$ -methylstyrene catalyzed by $\text{V}(\text{O})(\text{acac})_2$ :

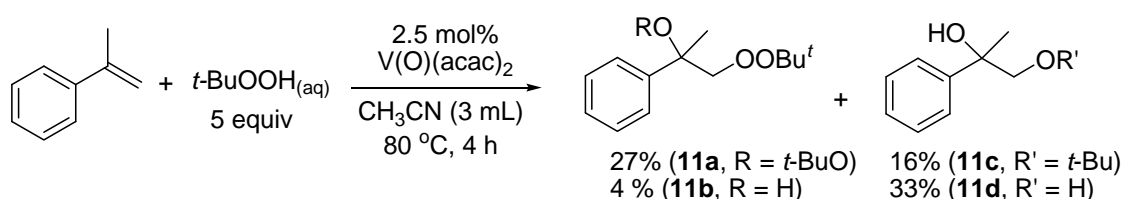

To a test tube,  $\text{V}(\text{O})(\text{acac})_2$  (7.2 mg, 2.5 mol%) was dissolved in 3 mL anhydrous  $\text{CH}_3\text{CN}$  and  $\alpha$ -methylstyrene (0.13 mL, 1.01 mmol) was added under nitrogen atmosphere via syringe and stirred for 5 min at  $80^\circ\text{C}$ . A solution of 70% aqueous *tert*-Butyl hydrogenperoxide (690  $\mu\text{L}$ ) was added to the reaction and stirred for 4 h at  $80^\circ\text{C}$ . After complete consuming of the  $\alpha$ -methylstyrene monitored by TLC, the

solvent and all volatiles were removed under reduced pressure. The residue was purified using flash chromatography on silica gel with EA/hexane 1:10.

**(1,2-Bis(*tert*-butylperoxy)propan-2-yl)benzene (11a)<sup>13</sup>**

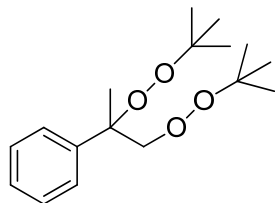

Isolated by column chromatography (EtOAc/hexanes = 1:10,  $R_f = 0.6$ ). The title compound was obtained as a colorless oil.

$^1\text{H}$  NMR (400 MHz,  $\text{CDCl}_3$ ):  $\delta$  7.48-7.46 (m, 2H), 7.32 (t,  $J = 7.2$  Hz, 2H), 7.26-7.25 (m, 1H), 4.26 (d,  $J = 9.6$  Hz, 1H), 4.22

(d,  $J = 9.6$  Hz, 1H), 1.66 (s, 3H), 1.25 (s, 9H), 1.21 (s, 9H);  $^{13}\text{C}$  NMR (100 MHz,  $\text{CDCl}_3$ ):  $\delta$  143.0, 127.8, 127.1, 126.0, 82.9, 80.5, 79.4, 79.2, 26.6, 26.2, 21.8; HRMS(ESI) calcd for  $\text{C}_{17}\text{H}_{28}\text{O}_4(\text{M}^+ + \text{Na})$ : 319.1886; found: 319.1882.

---

[13] F. Fontana, S. Araneo, F. Recupero, S. Banfi, S. Quici, F. Minisci, *J. Am. Chem. Soc.* **1995**, *117*, 226.

**1-(*tert*-Butylperoxy)-2-phenylpropan-2-ol (11b)<sup>14</sup>**

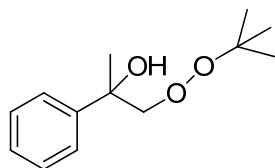

Isolated by column chromatography (EtOAc/hexanes = 1:10,  $R_f = 0.5$ ). The title compound was obtained as a colorless oil.

$^1\text{H}$  NMR (400 MHz,  $\text{CDCl}_3$ ):  $\delta$  7.45-7.43 (m, 2H), 7.35 (t,  $J =$

7.2 Hz, 2H), 7.29-7.26 (m, 1H), 4.00 (d,  $J = 11.8$  Hz, 1H), 3.89 (d,  $J = 11.8$  Hz, 1H), 1.66 (s, 3H), 1.53 (s, 3H), 1.30 (s, 9H);  $^{13}\text{C}$  NMR (100 MHz,  $\text{CDCl}_3$ ):  $\delta$  142.2, 128.1, 127.2, 125.8, 84.2, 79.8, 68.2, 26.5, 22.3; HRMS(ESI) calcd for  $\text{C}_{13}\text{H}_{20}\text{O}_3(\text{M}^+ + \text{Na})$ : 247.131; found: 247.1308.

**1-(*tert*-Butoxy)-2-phenylpropan-2-ol (11c)**

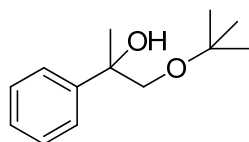

Isolated by column chromatography (EtOAc/hexanes = 1:10,  $R_f$  = 0.55). The title compound was obtained as a colorless oil.  $^1\text{H}$  NMR (400 MHz,  $\text{CDCl}_3$ )  $\delta$  7.47 (d,  $J$  = 8.6 Hz, 2H), 7.34 (t,  $J$  = 8.6 Hz, 2H), 7.27 – 7.25 (m, 1H), 4.18 (d,  $J$  = 12.2 Hz, 1H), 4.08 (d,  $J$  = 12.2 Hz, 1H), 1.58 (s, 3H), 1.22 (s, 9H);  $^{13}\text{C}$  NMR (100 MHz,  $\text{CDCl}_3$ )  $\delta$  144.9, 128.1, 126.9, 125.1, 82.9, 81.2, 75.1, 26.6, 26.2; HRMS(ESI) calcd for  $\text{C}_{13}\text{H}_{20}\text{O}_2(\text{M}^+ + \text{Na})$ : 231.1361; found: 231.1356.

### 2-Phenylpropane-1, 2-diol (11d)<sup>15</sup>

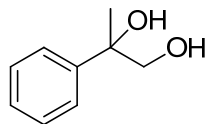

Isolated by column chromatography (EtOAc/hexanes = 1:10,  $R_f$  = 0.45). The title compound was obtained as a colorless oil.  $^1\text{H}$  NMR (400 MHz,  $\text{CDCl}_3$ ):  $\delta$  7.45 (d,  $J$  = 7.8 Hz, 2H), 7.34 (t,  $J$  = 7.3 Hz, 2H), 7.27 (t,  $J$  = 7.5 Hz, 1H), 3.79 (d,  $J$  = 11.2 Hz, 1H), 3.63 (d,  $J$  = 11.2 Hz, 1H), 2.10 (s, br, 2H), 1.53 (s, 3H);  $^{13}\text{C}$  NMR (100 MHz,  $\text{CDCl}_3$ ):  $\delta$  144.9, 128.4, 127.1, 125.0, 74.8, 71.0, 26.0; HRMS(ESI) calcd for  $\text{C}_9\text{H}_{12}\text{O}_2(\text{M}^+ + \text{Na})$ : 175.0735; found: 175.0724.

[14] S. Bhat, S. Chandrasekaran, *Tetrahedron Lett.* **1996**, *37*, 3581.

[15] a) Q. Yao, *Org. Lett.* **2002**, *4*, 2197-2199; b) Z. Wang, Y.-T. Cui, Z.-B. Xu, J. Qu, *J. Org. Chem.* **2008**, *73*, 2270

0423

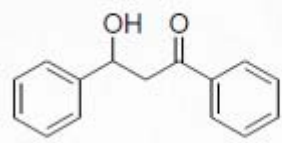

3a

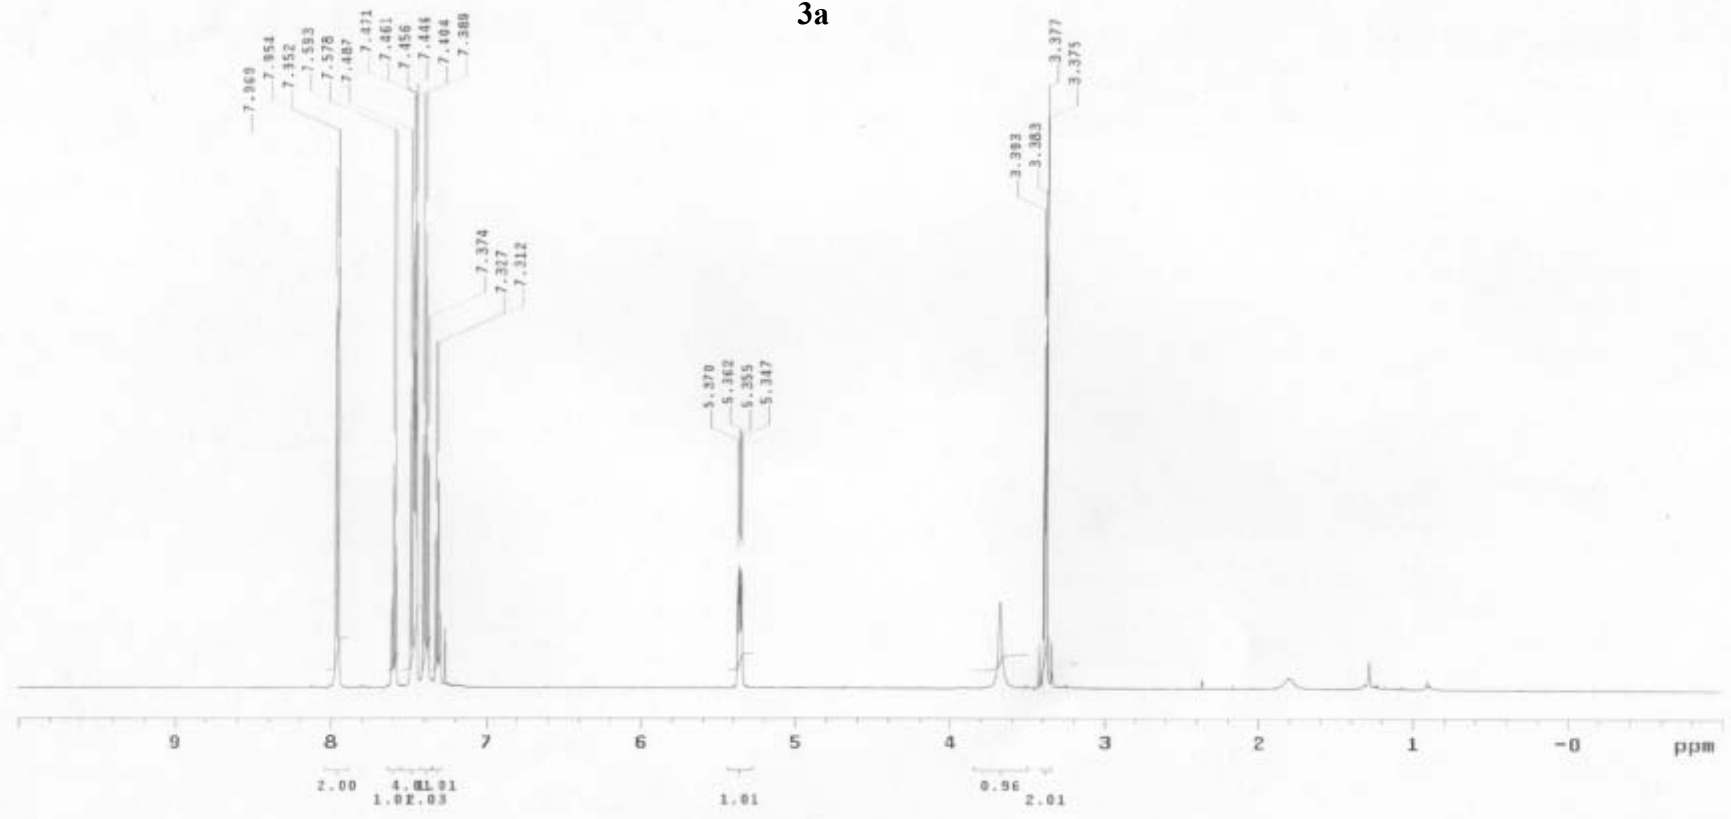

0623

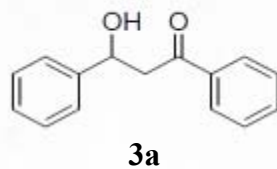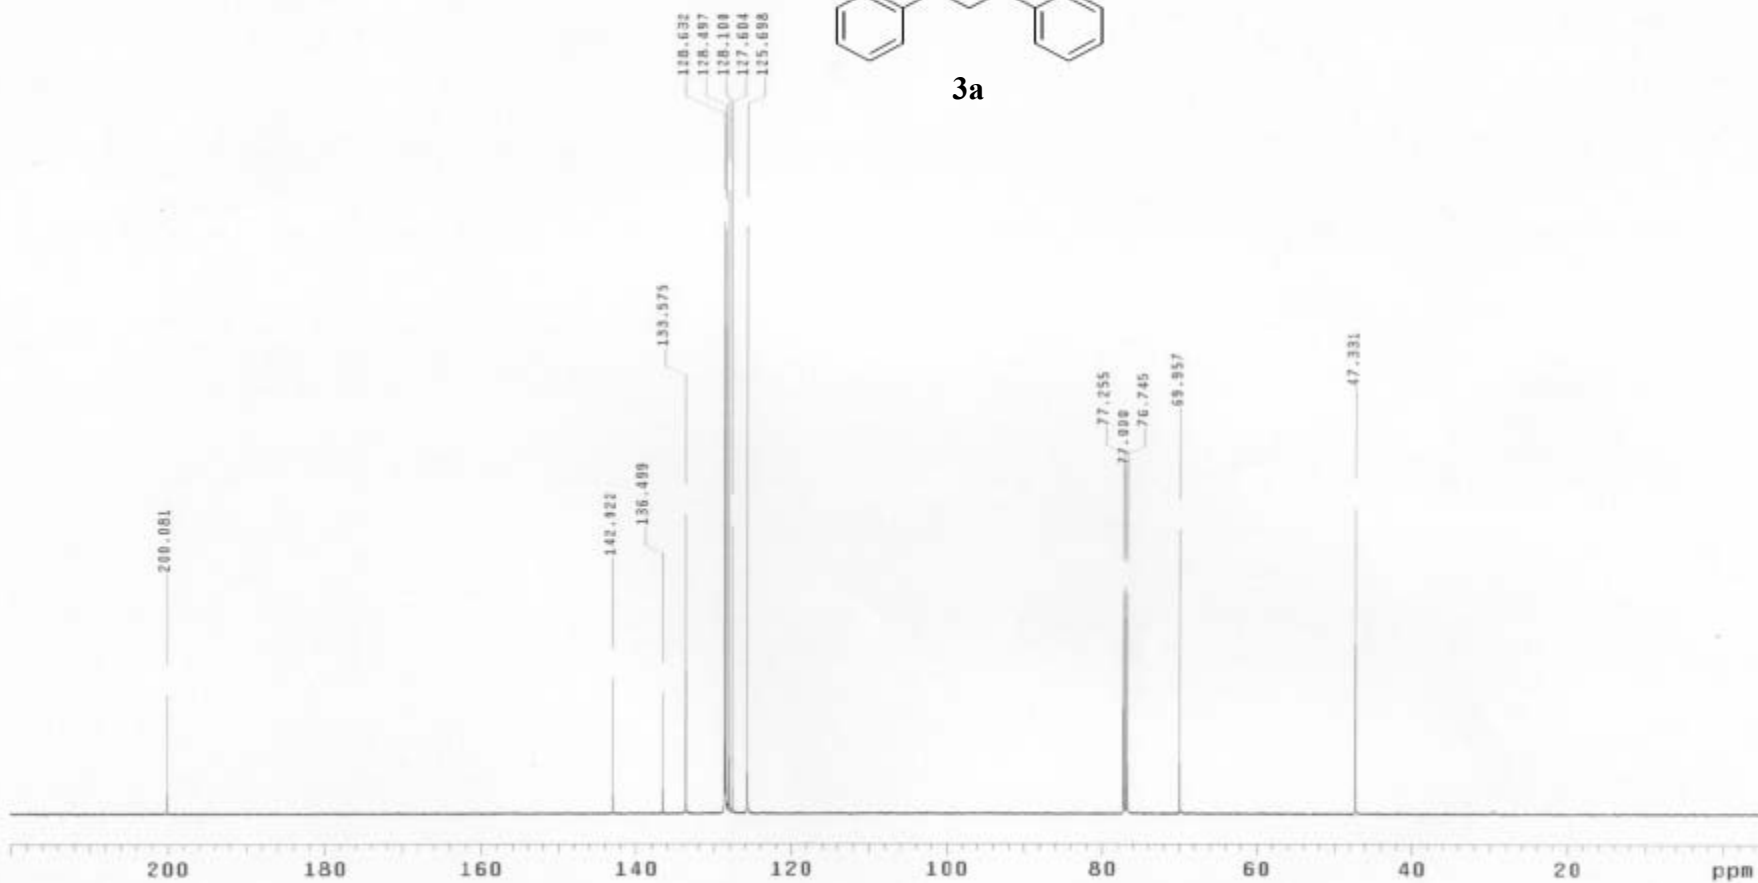



0601  
Pulse Sequence: s2pul  
UNITYplus-400 "unity400"  
Date: Aug 29 2013  
Solvent: CDCl3  
Ambient temperature  
Total: 64 repetitions

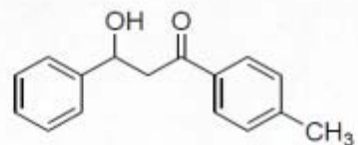

3b

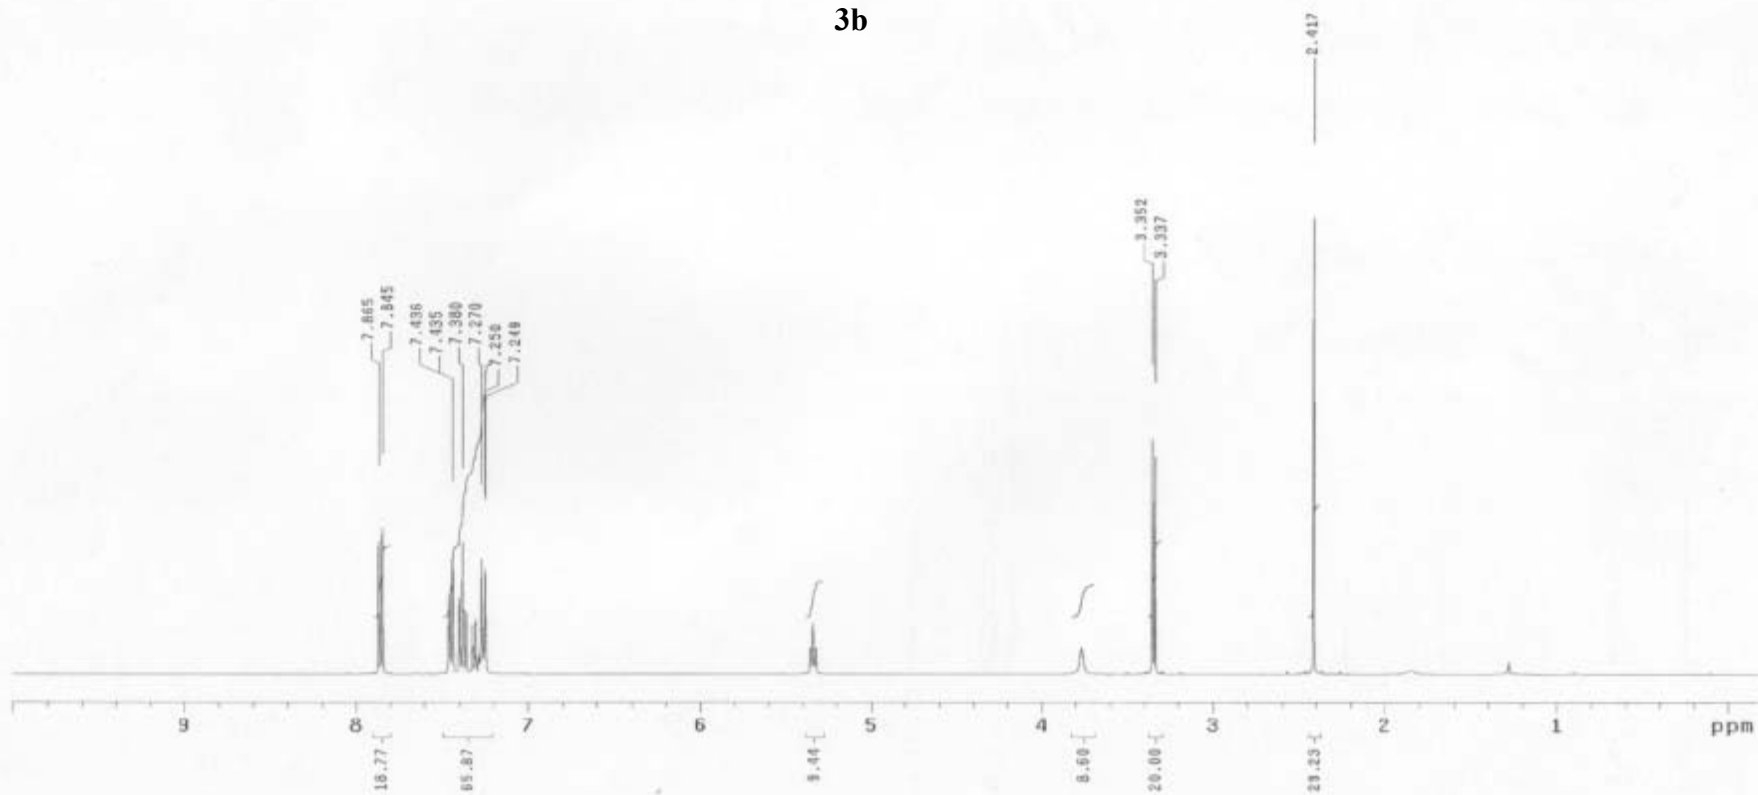

0001

Pulse Sequence: szpul  
UNIFYplus-400 "unity400"  
Date: Aug 28 2013  
Solvent: CDCl<sub>3</sub>  
Ambient temperature  
Total 836 repetitions

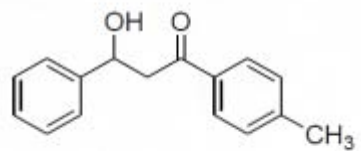

3b

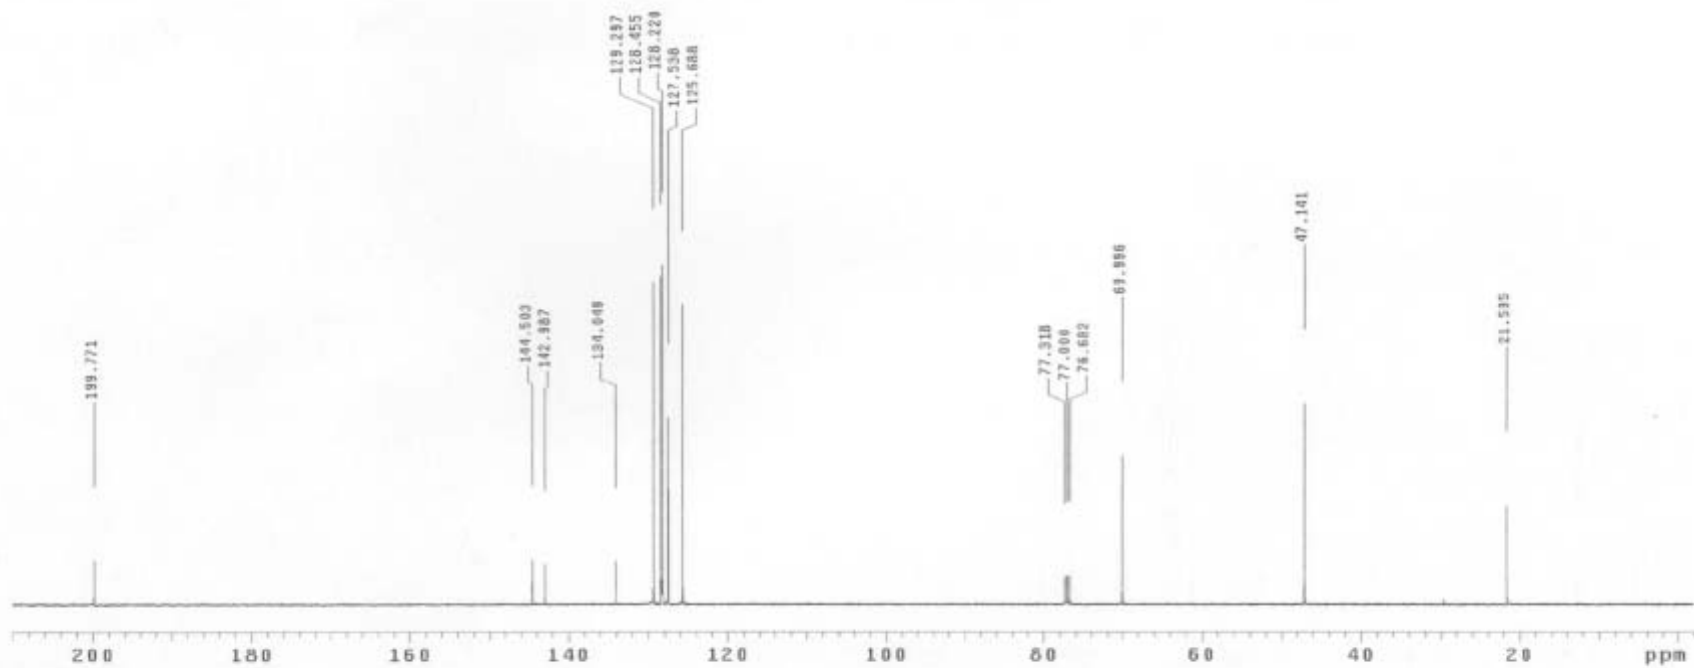

0892

Pulse Sequence: s2pu1  
UNITYplus-400 "unity400"  
Date: Aug 28 2013  
Solvent: CDCl3  
Ambient temperature  
Total: 48 repetitions

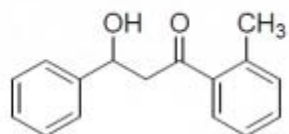

3c

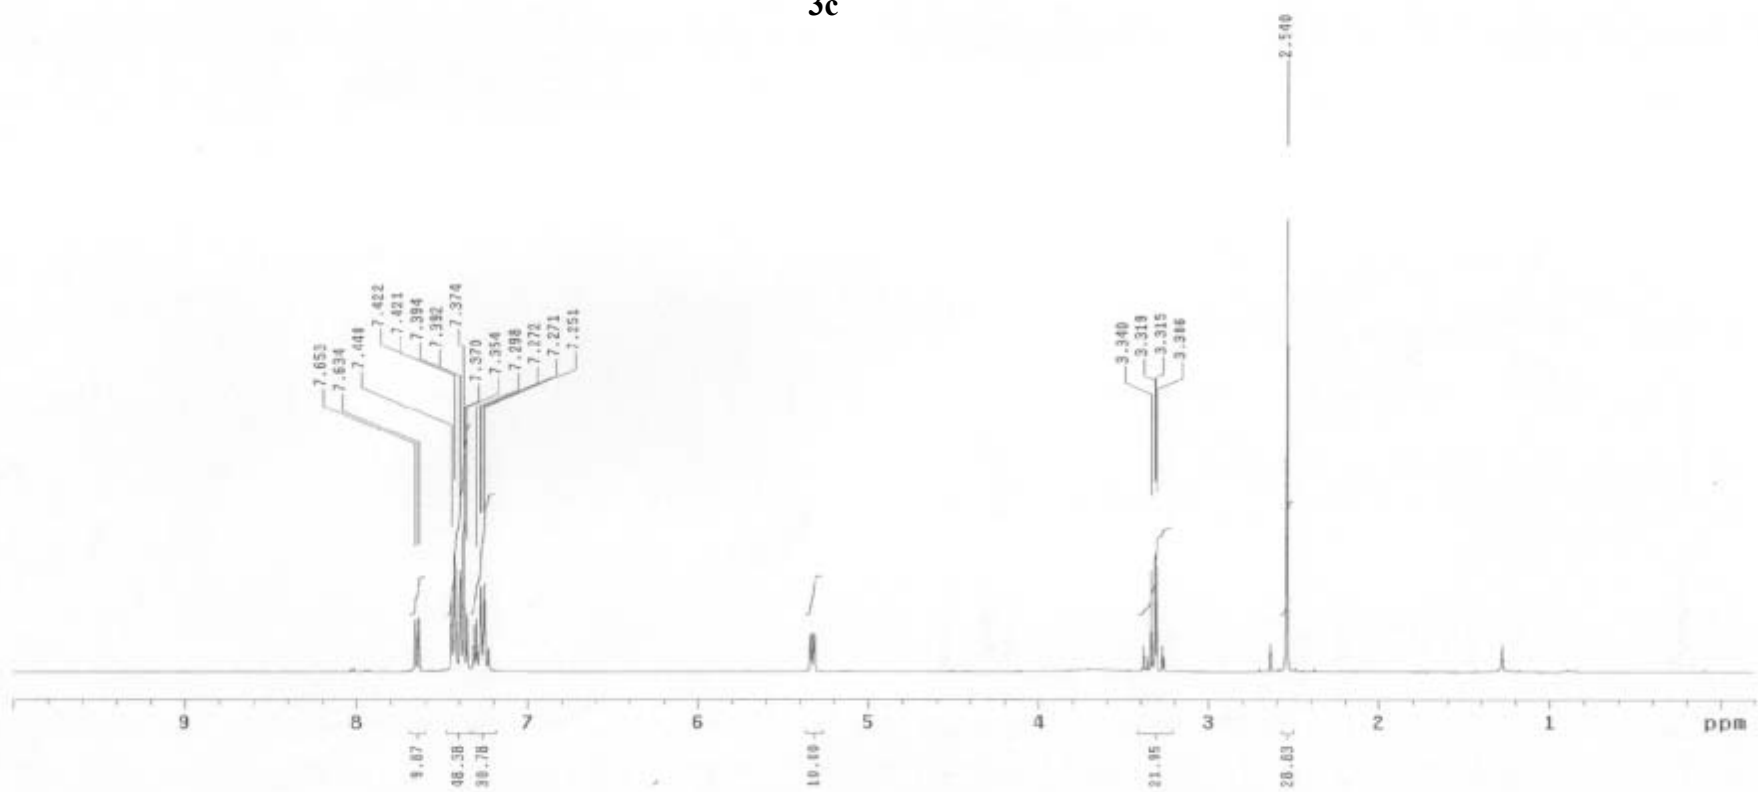

0802

Pulse Sequence: s2pul  
UNITYplus-400 "unity400"  
Date: Aug 29 2013  
Solvent: CDCl3  
Ambient temperature  
Total 856 repetitions

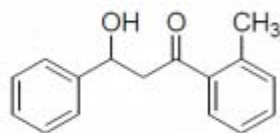

3c

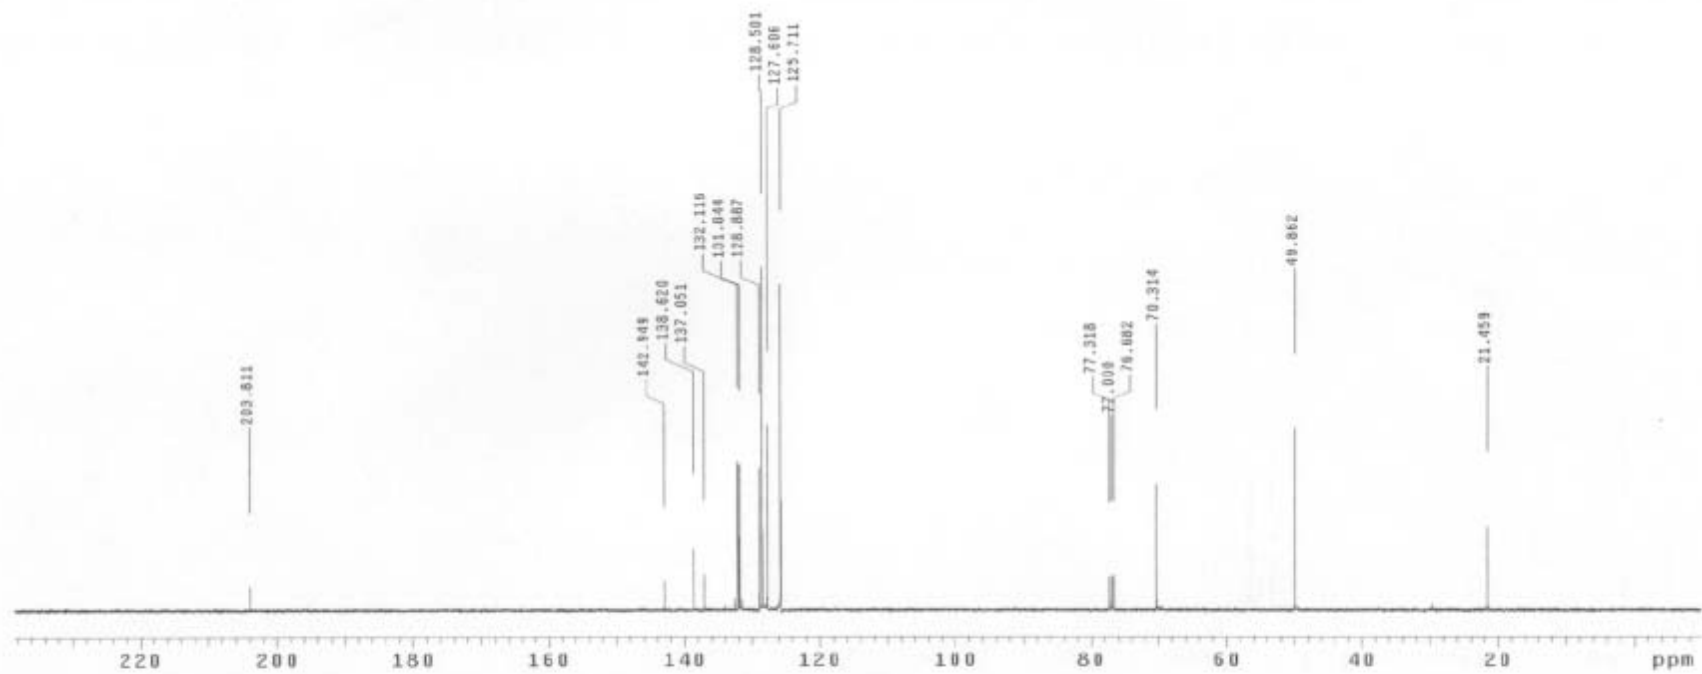

0804  
Pulse Sequence: s2p01  
UNITYplus-400 "unity400"  
Date: Aug 28 2013  
Solvent: CDCl3  
Ambient Temperature  
Total 64 repetitions

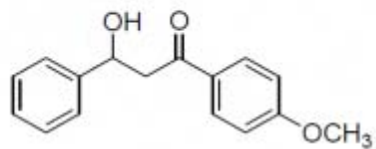

3d

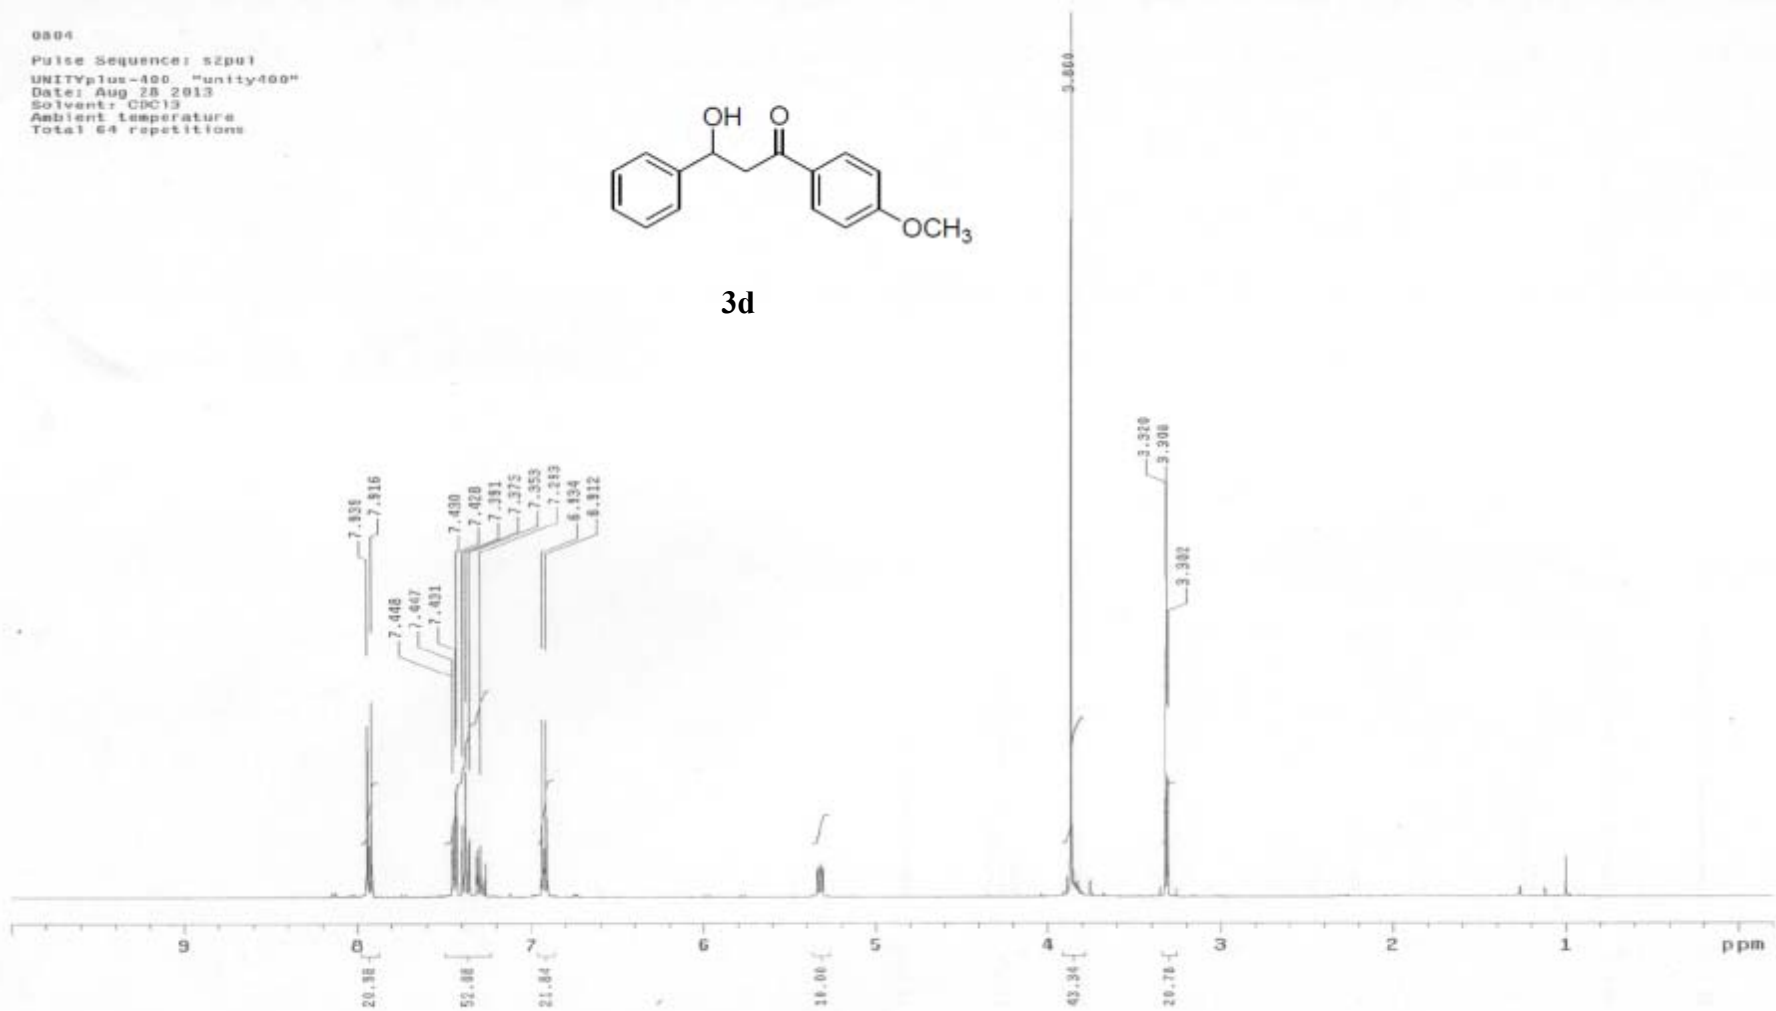

0804

Pulse Sequence: s2pu1

UNITYplus-400 "unity400"

Date: Aug 28 2013

Solvent: CDCl<sub>3</sub>

Ambient temperature

Total 448 repetitions

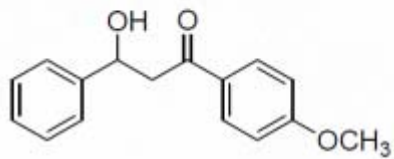

3d

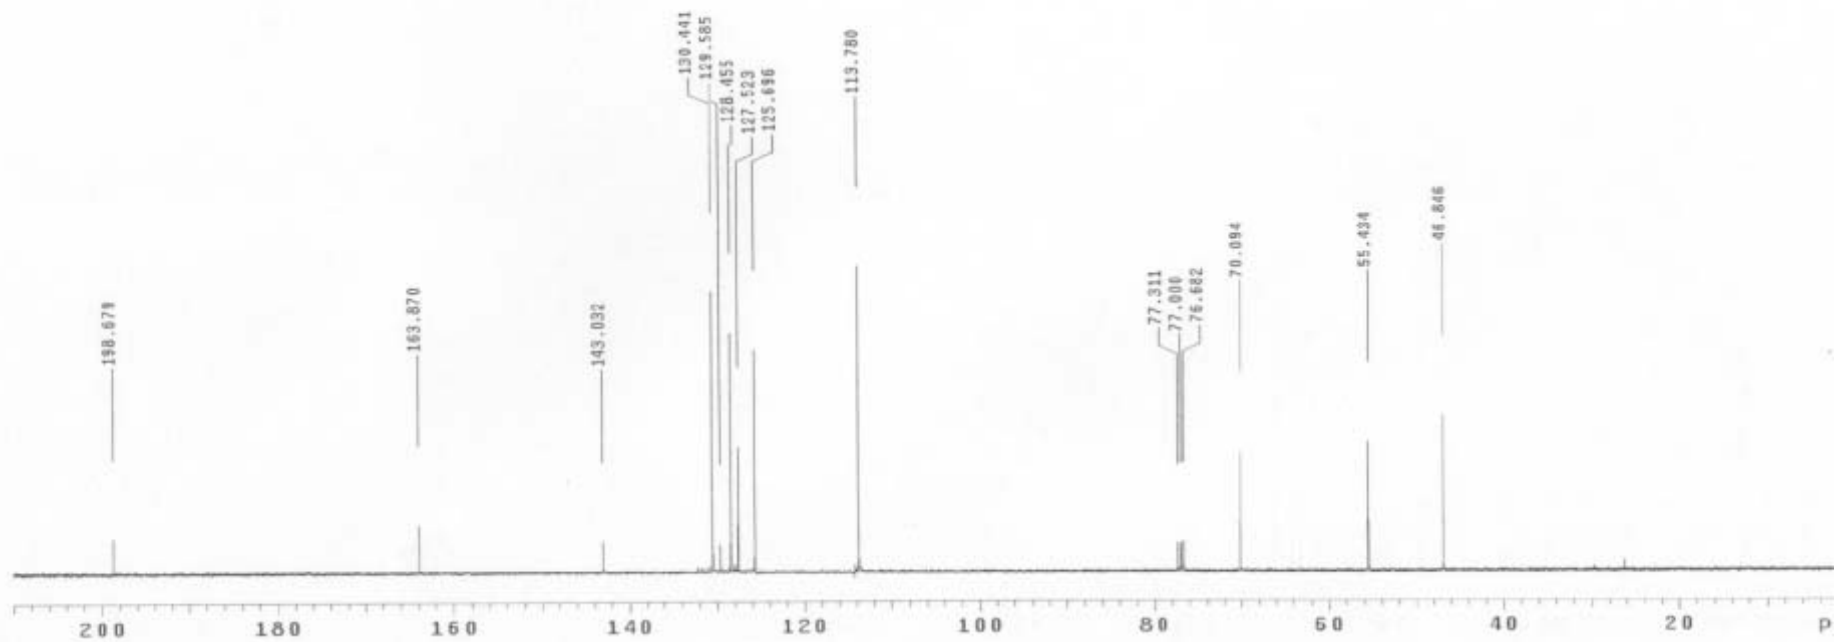

0907

Pulse Sequence: szpul  
Solvent: CDCl3  
Ambient temperature  
Mercury-400BB "MercuryPlus400"

Pulse 48.1 degrees  
Acq. time 4.602 sec  
Width 5955.2 Hz  
32 repetitions  
OBSERVE H1, 400.3978961 MHz  
DATA PROCESSING  
Line broadening 0.1 Hz  
FT size 65536  
Total time 2 min, 33 sec

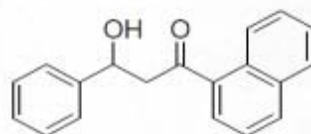

3e

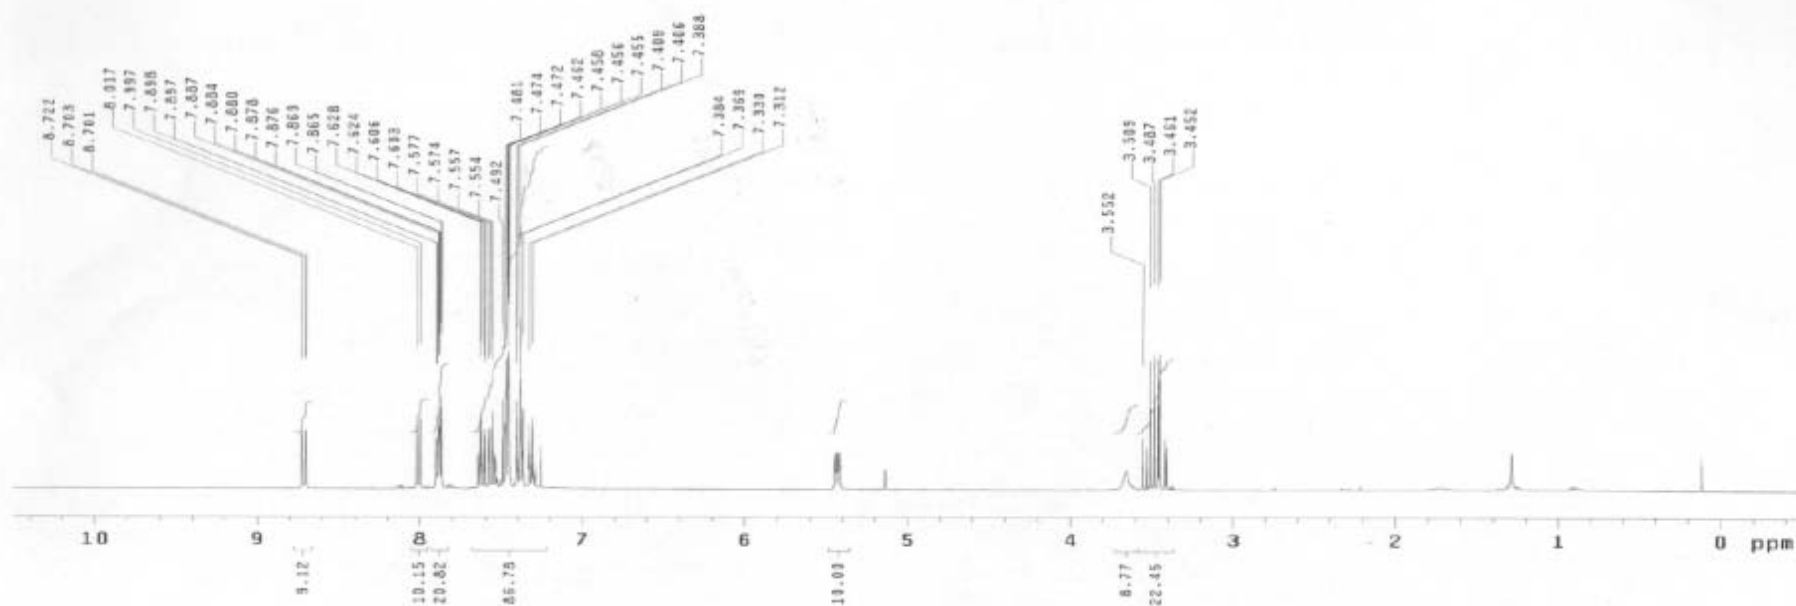

0507

Pulse Sequence: s2pu1

Solvent: CDCl<sub>3</sub>

Ambient temperature

Mercury-400BB "MercuryPlus400"

Pulse 68.7 degrees

Acq. time 1.000 sec

Width 25000.0 Hz

2512 repetitions

OBSERVE C13, 100.5801391 MHz

DECOUPLE H1, 400.3999572 MHz

Power 38 dB

continuously on

WALTZ-16 modulated

DATA PROCESSING

Line broadening 1.0 Hz

FT size 65536

Total time 8 hr, 44 min, 37 sec

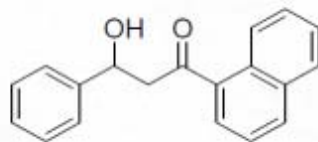

3e

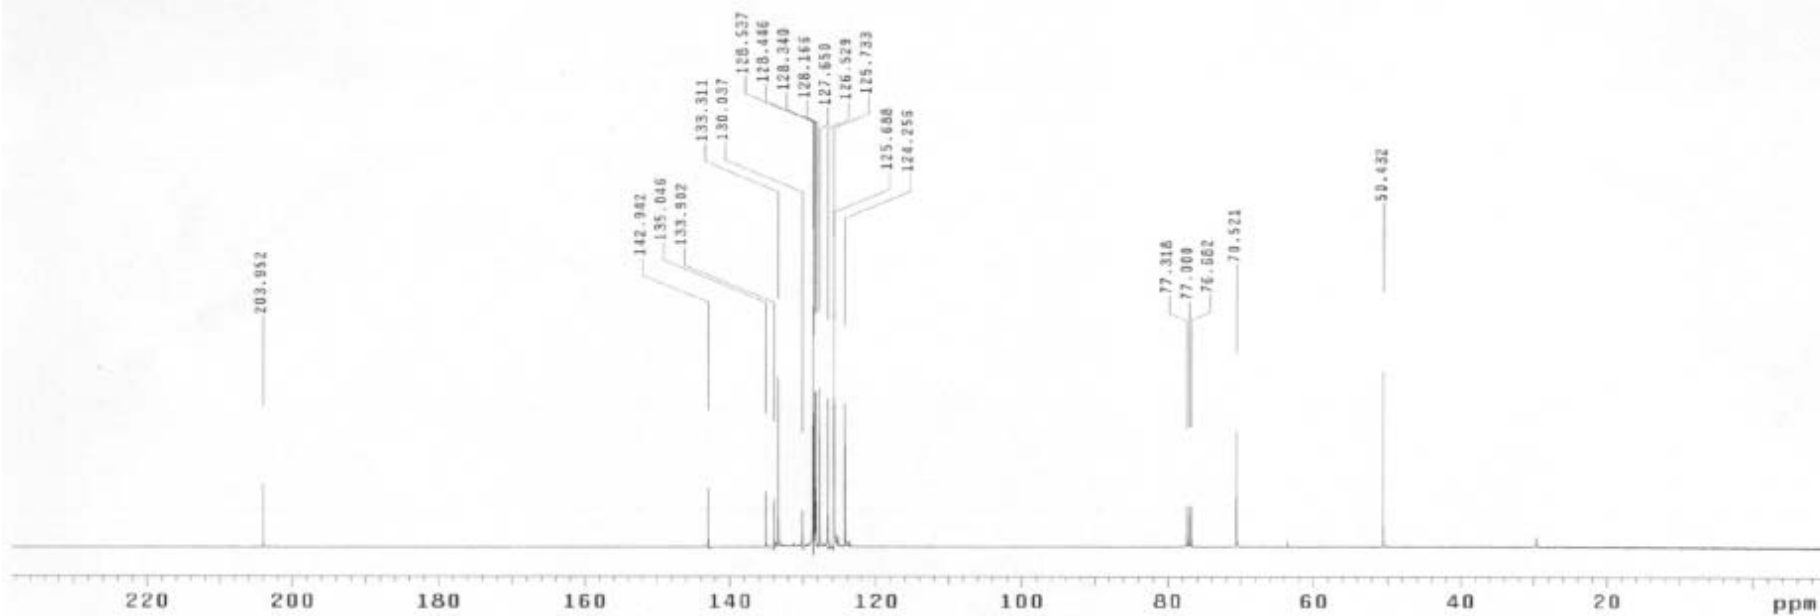



Pulse Sequence: s2pu1  
UNITYplus-400 "unity400"  
Date: Aug 28 2013  
Solvent: CDCl3  
Ambient temperature  
Total 64 repetitions

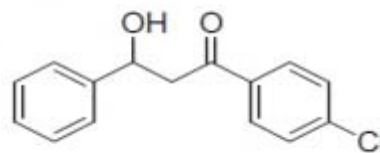

3f

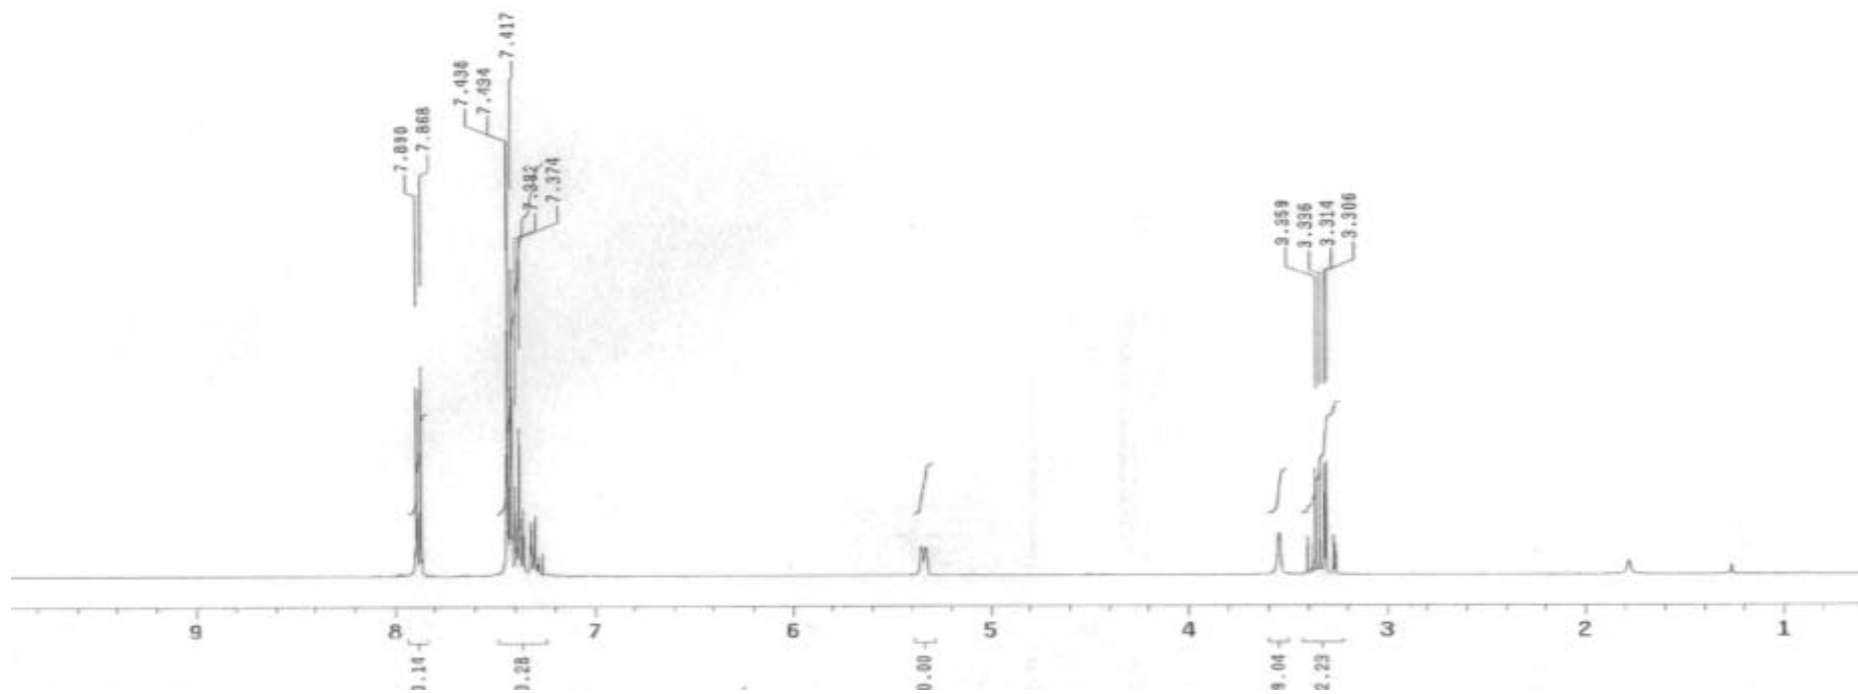

0803

Pulse Sequence: s2pu1  
UNITYplus-400 "unity400"  
Date: Aug 28 2013  
Solvent: CDCl3  
Ambient temperature  
Total 448 repetitions

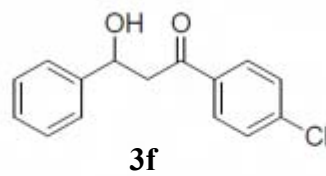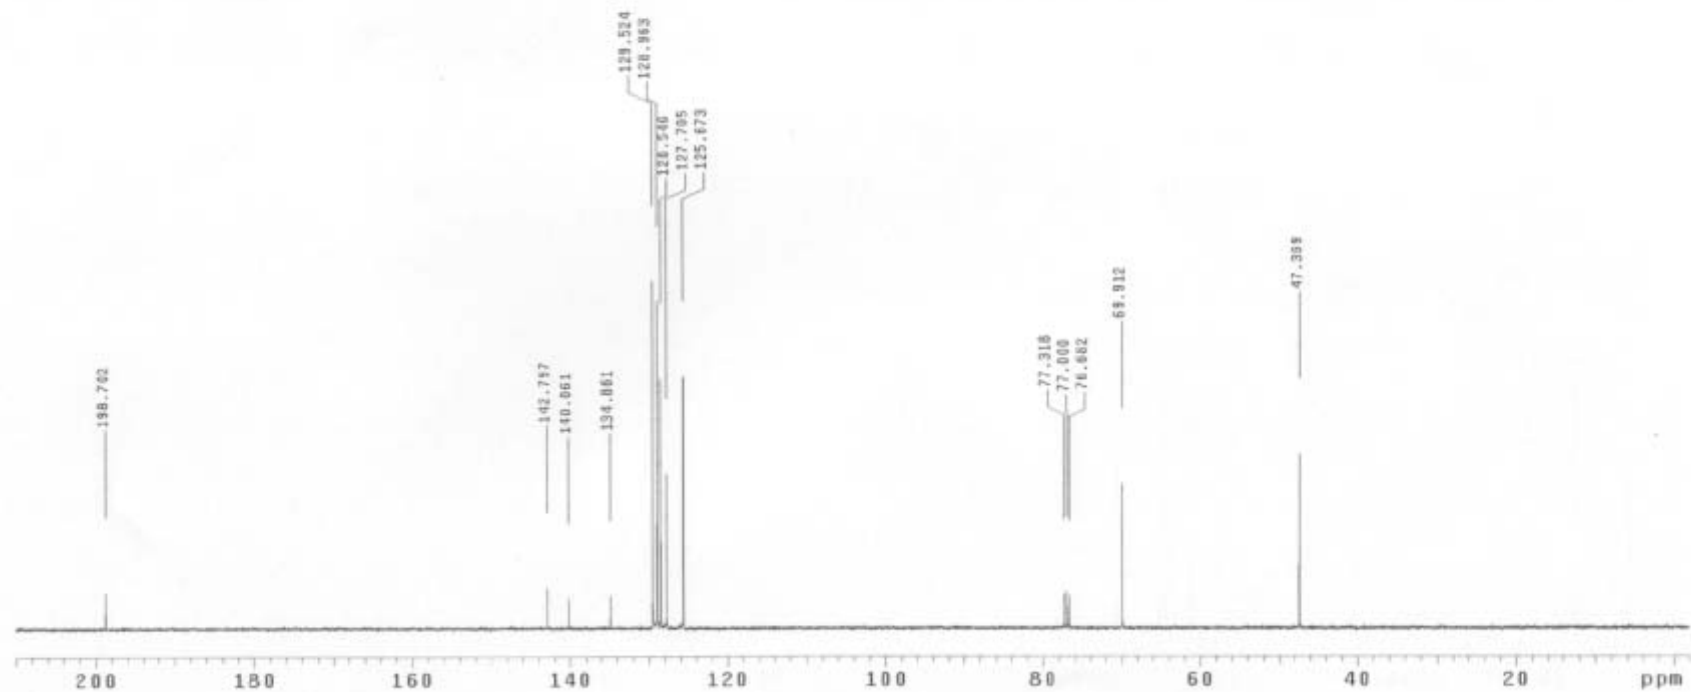

0902

Pulse Sequence: e2pu1  
UNIFYplus-400 "unity400"  
Date: Sep 5 2013  
Solvent: CDCl3  
Ambient temperature  
Total 64 repetitions

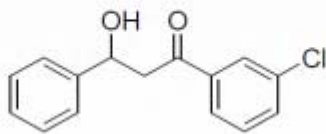

3g

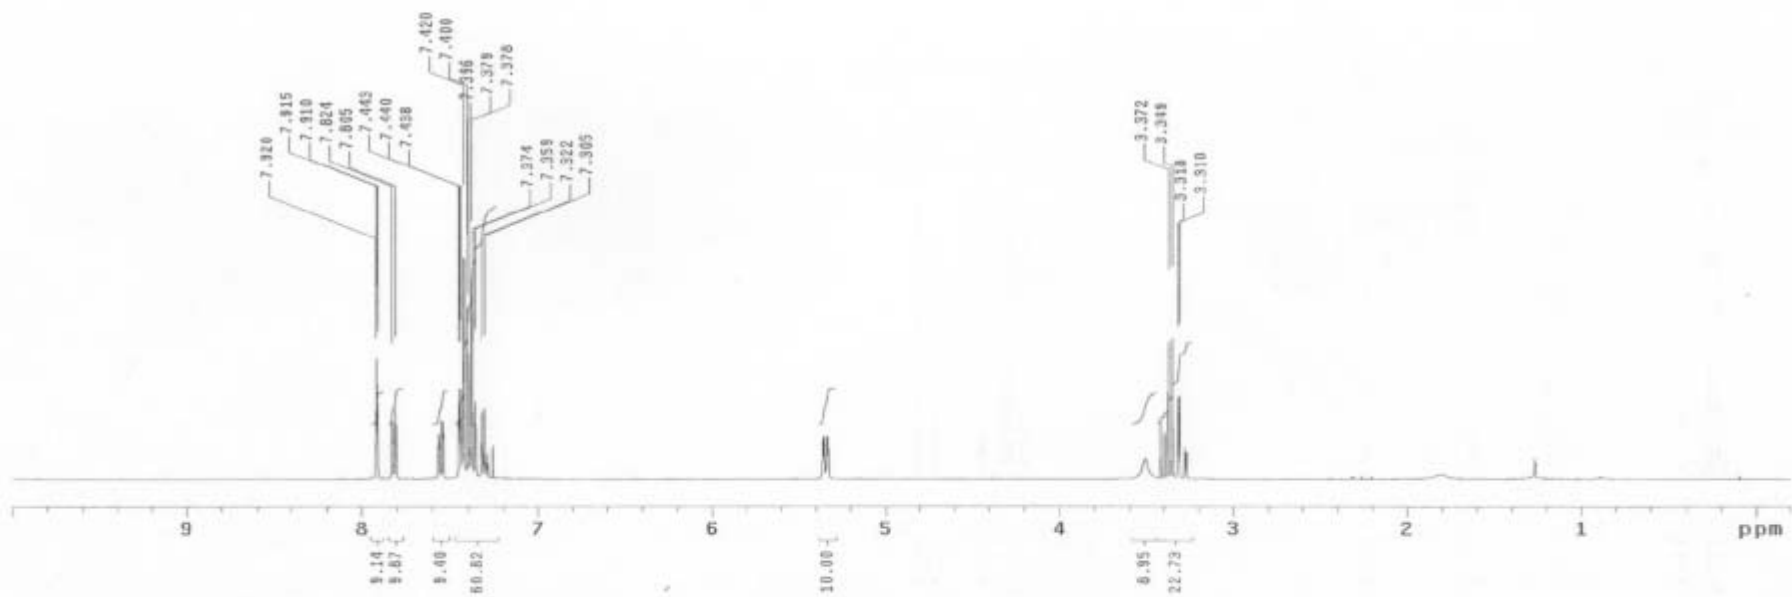

0902

Pulse Sequence: s2pu1  
UNITYplus-400 "unity400"  
Date: Sep 5 2013  
Solvent: CDCl3  
Ambient temperature  
Total 1360 repetitions

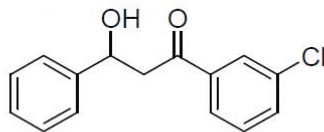

3g

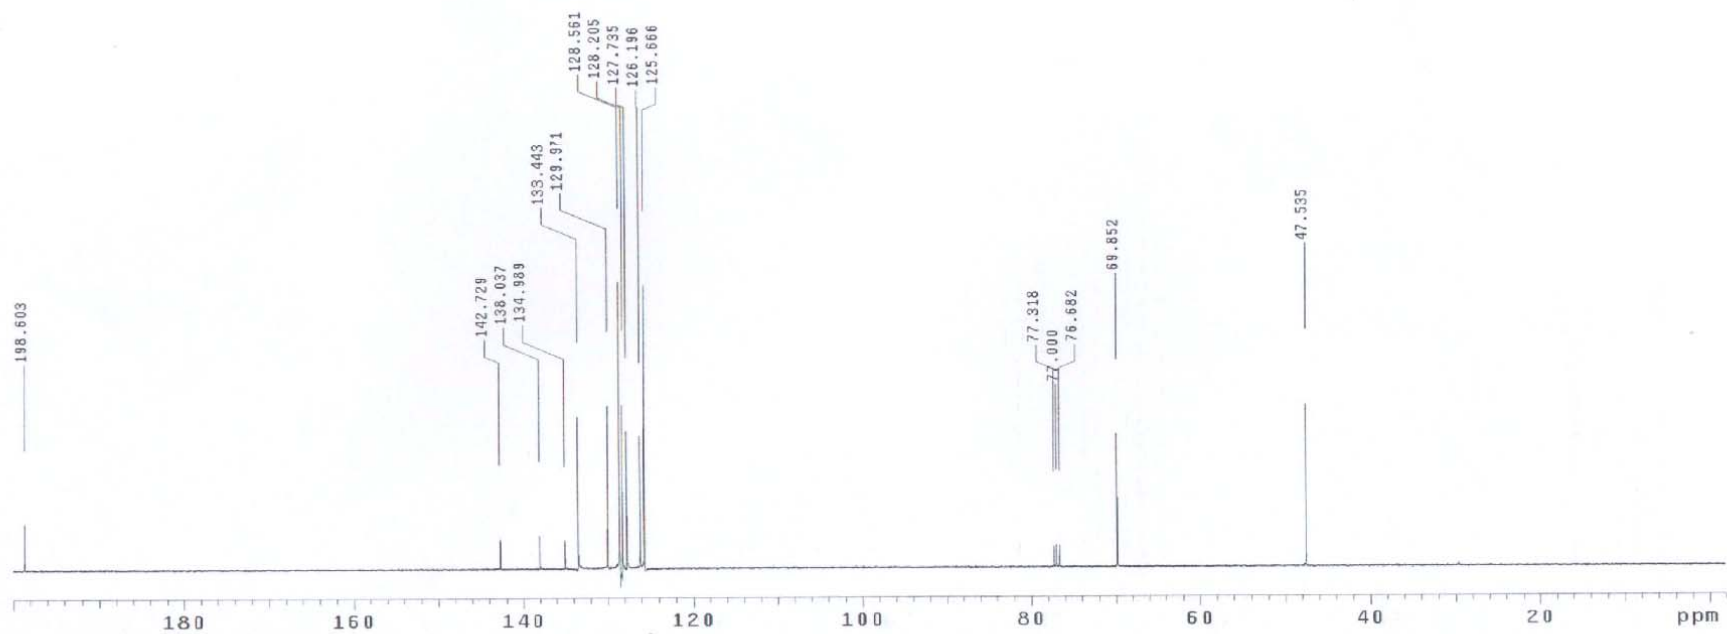

0826

Pulse Sequence: s2pu1  
UNITYplus-400 "unity400"  
Date: Sep 5 2013  
Solvent: CDCl3  
Ambient temperature  
Total 32 repetitions

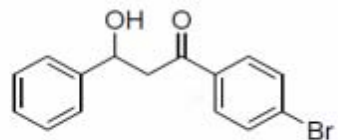

3h

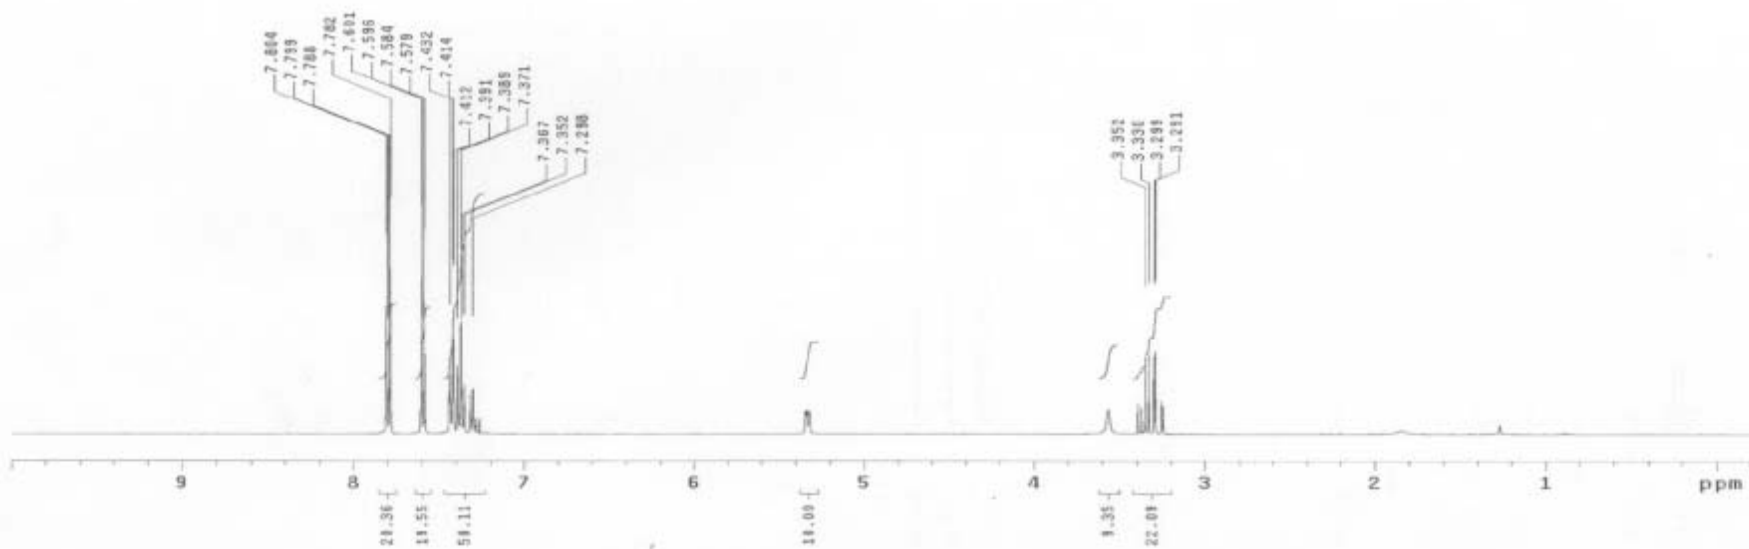

0026

Pulse Sequence: s2pu1  
UNITYplus-400 "unity400"  
Date: Sep 3 2013  
Solvent: CDCl3  
Ambient temperature  
Total 784 repetitions

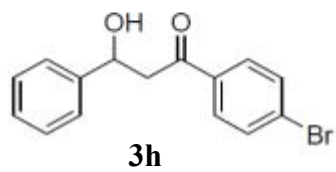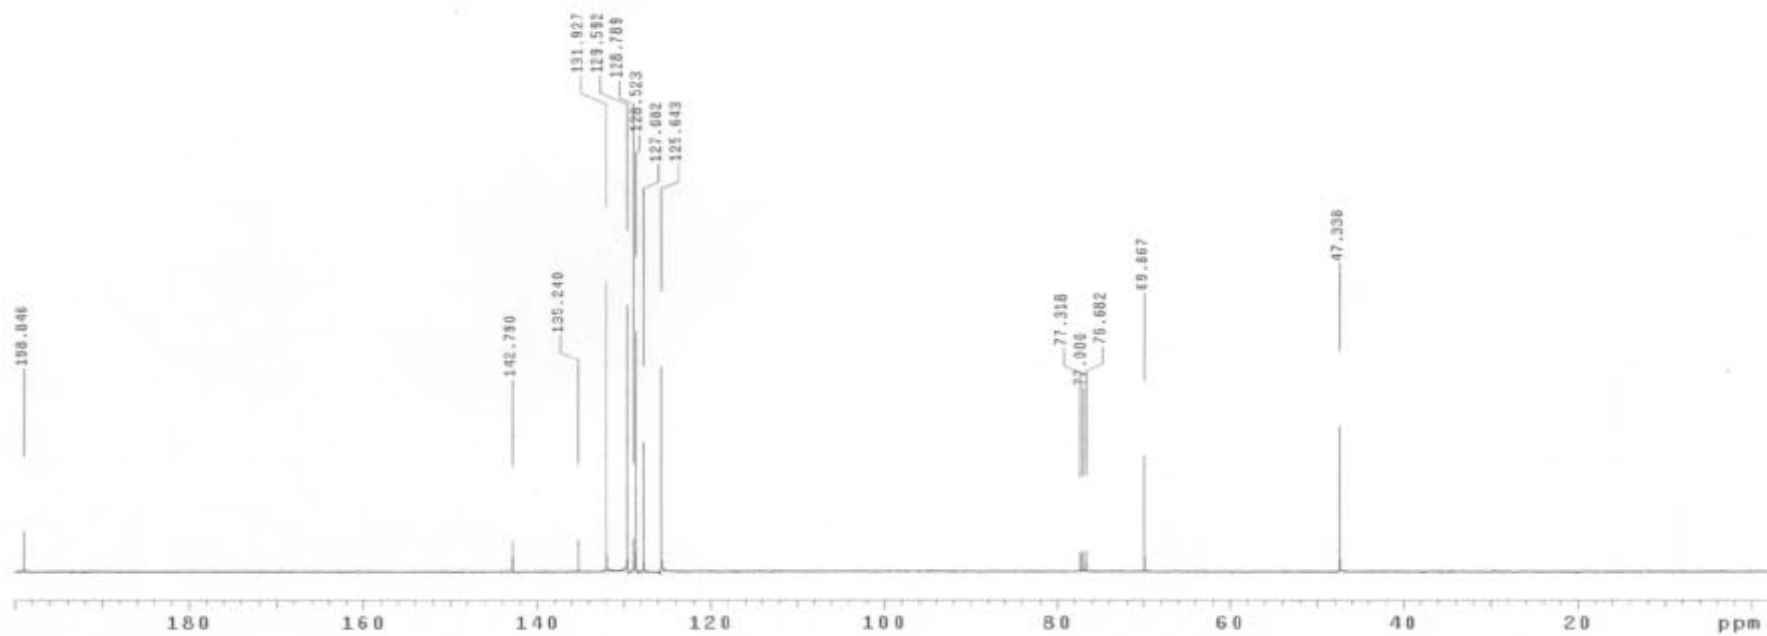

1002  
Pulse Sequence: s2pul  
Solvent: CDCl3  
Ambient temperature  
Mercury-400BB "MercuryPlus400"  
  
Pulse 4A.1 degrees  
Acq. time 4.002 sec  
Width 5995.2 Hz  
32 Repetitions  
OBSERVE H1, 400.3970959 MHz  
DATA PROCESSING  
FT size 65536  
Total time 5 min, 7 sec

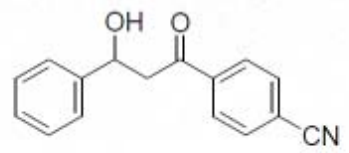

3i

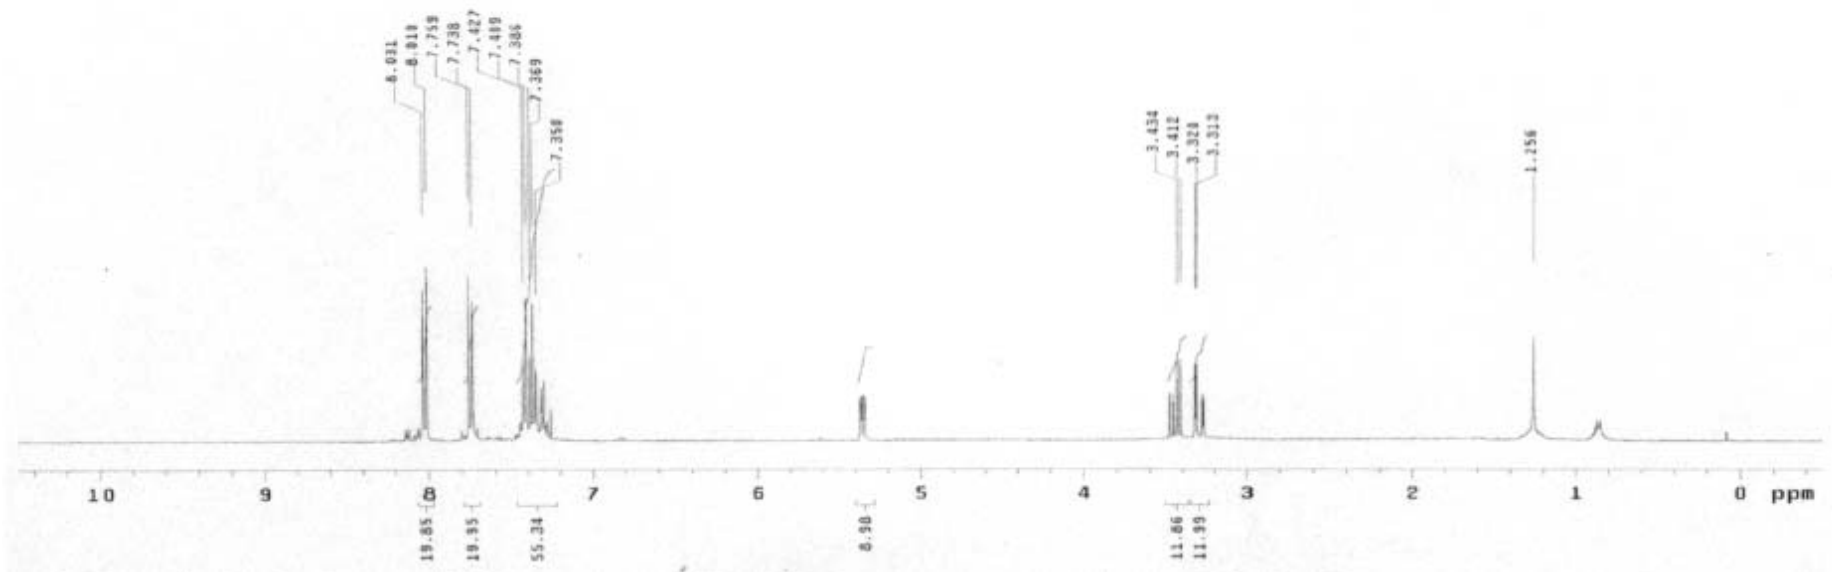

1002

Pulse Sequence: s2pu1  
Solvent: CDCl3  
Ambient temperature  
Mercury-400SB "MercuryPlus400"

Pulse 66.7 degrees  
Acq. time 1.080 sec  
Width 25003.0 Hz  
4224 repetitions  
OBSERVE C13, 100.6261399 MHz  
DECOUPLE H1, 400.3995572 MHz  
Power 30 dB  
continuously on  
WALTZ-16 modulated  
DATA PROCESSING  
Line broadening 1.0 Hz  
FT size 65536  
Total time 21 hr, 51 min, 24 sec

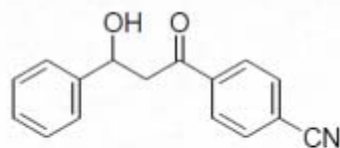

3i

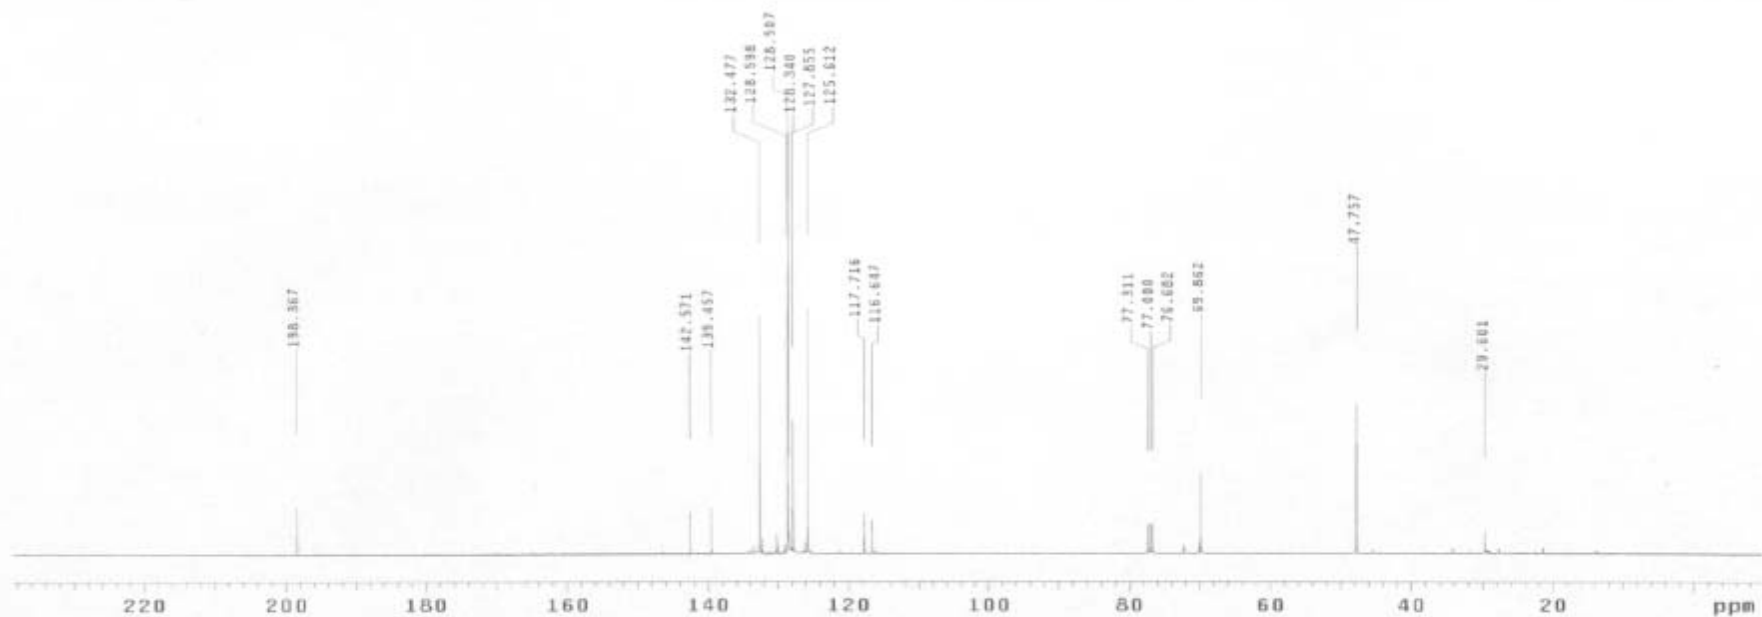



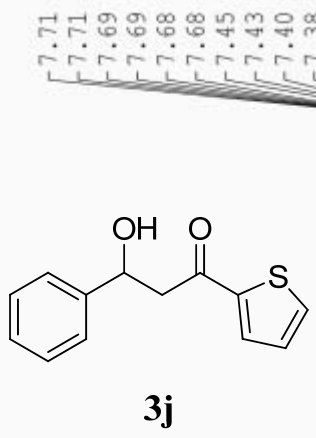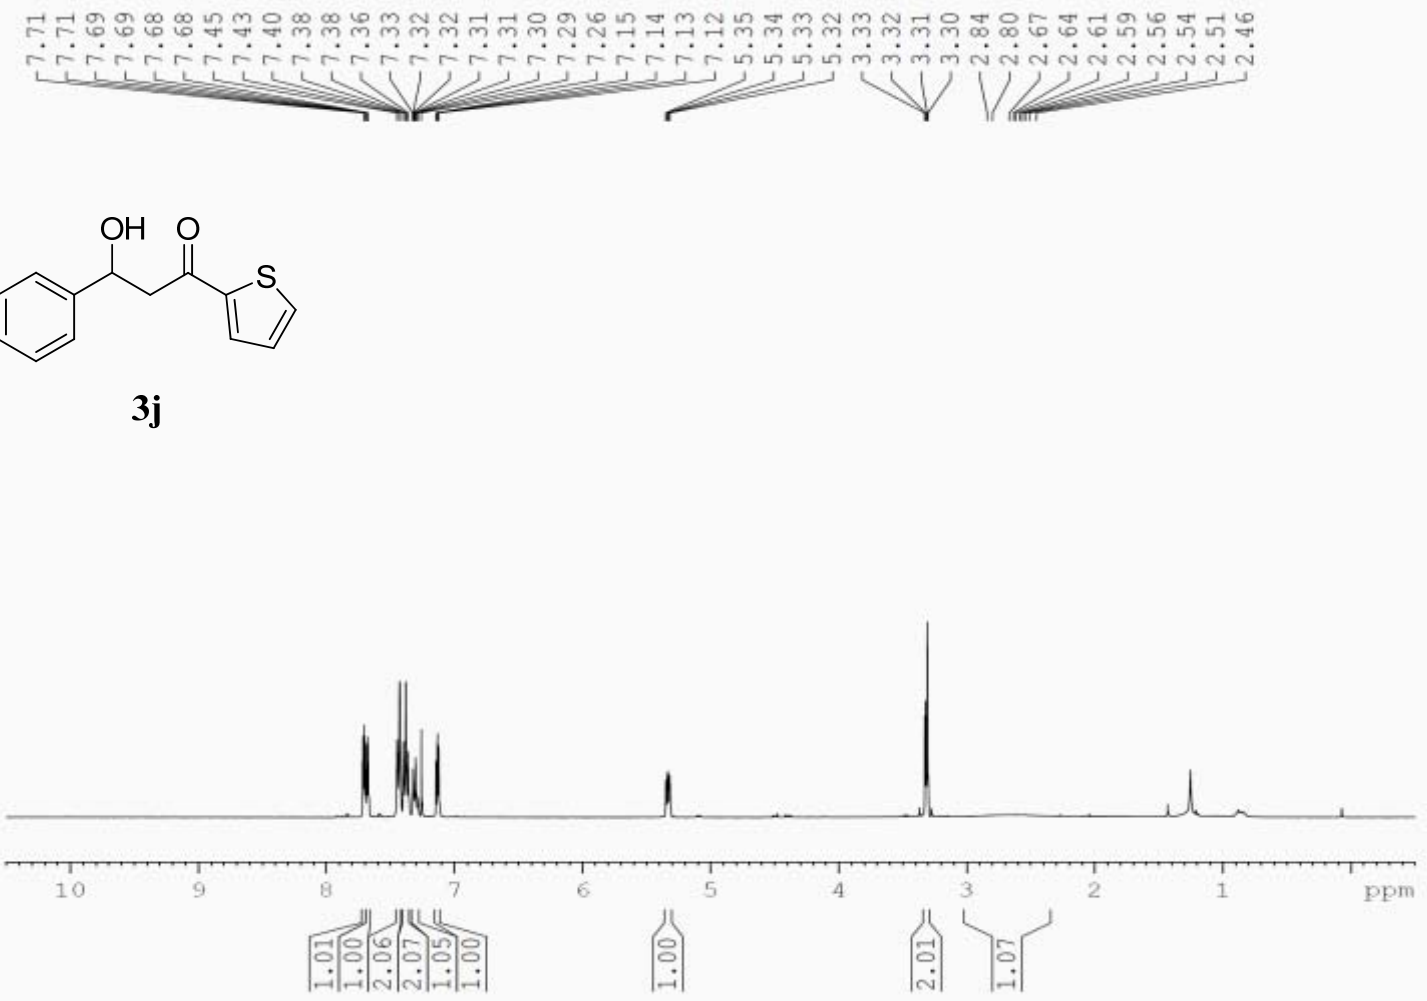

```

Current Data Parameters
NAME      20131006
EXPNO     8
PROCNO    1

F2 - Acquisition Parameters
Date_     20131006
Time      23.21
INSTRUM   spect
PROBHD    5 mm DOL 13C-1
PULPROG   zg30
TD         32768
SOLVENT   CDCl3
NS         18
DS         0
SWH        6410.256 Hz
FIDRES     0.195625 Hz
AQ         2.5559540 sec
RG         228
DM         78.000 usec
DE         6.00 usec
TE         300.0 K
D1         2.00000000 sec
TD0        1

----- CHANNEL f1 -----
NUC1       1H
P1         10.00 usec
PL1        -2.40 dB
SFO1       400.1528010 MHz

F2 - Processing parameters
SI         16384
SF         400.1500172 MHz
WDW        EM
SSB        0
LB         0.00 Hz
GB         0
PC         1.00
  
```

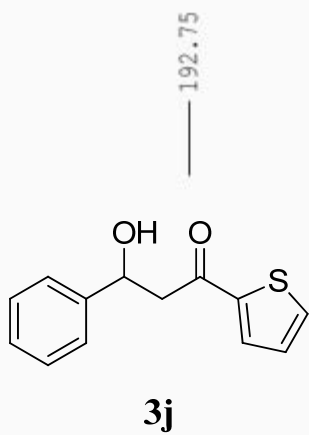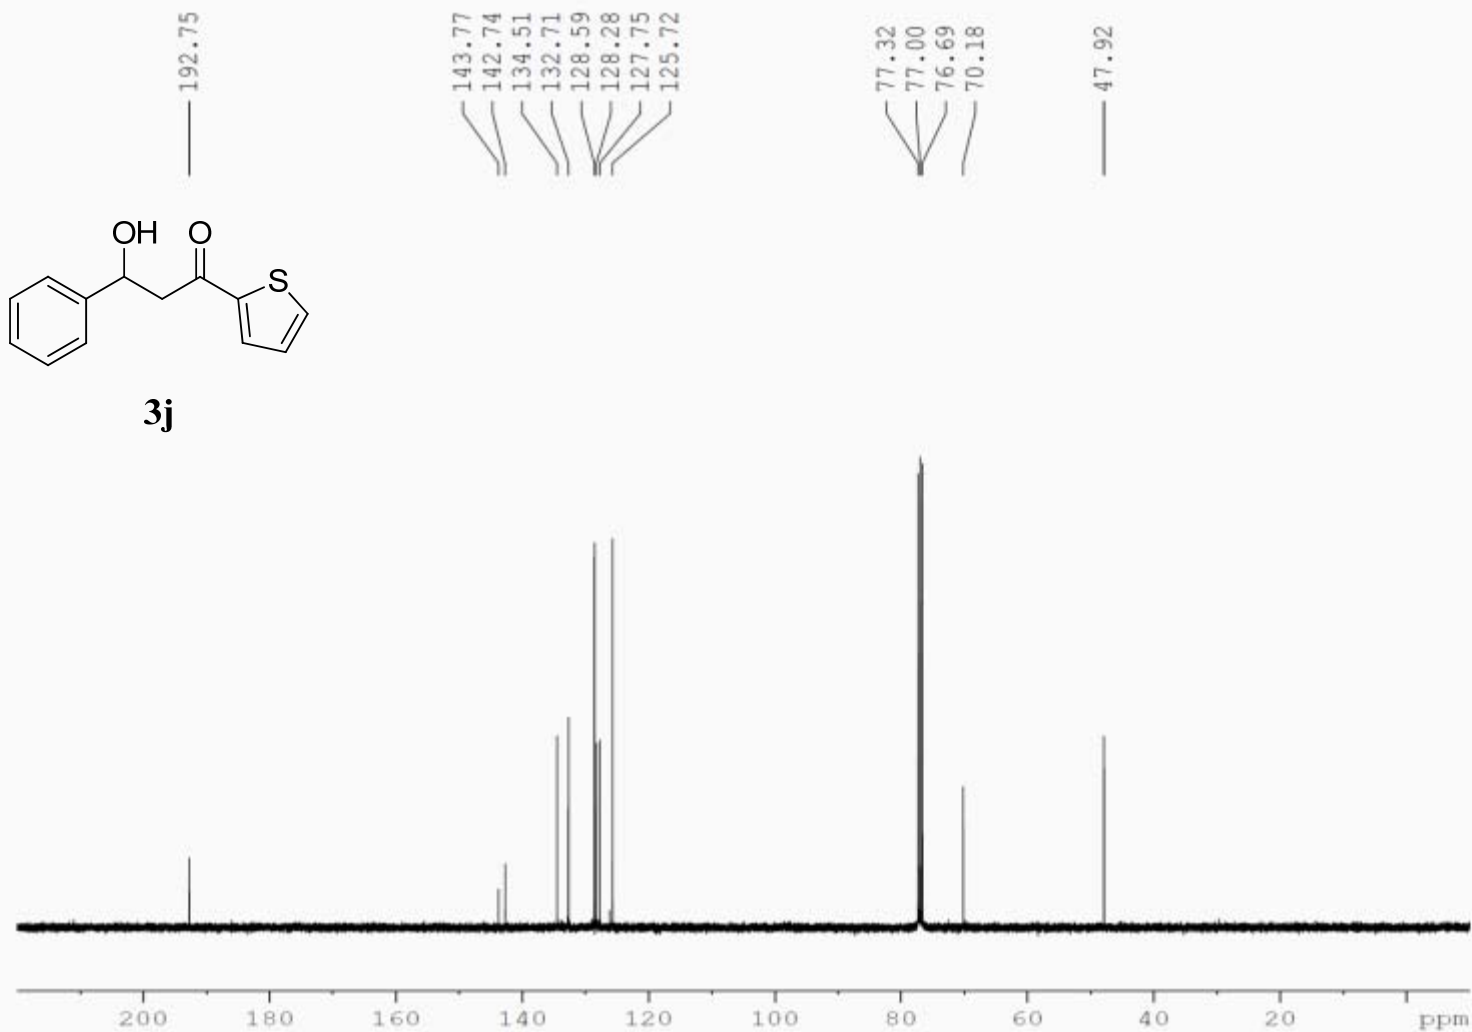

```

Current Data Parameters
NAME      RA-TN-OR-C-1.fid
EXPNO    1
PROCNO   1

FC - Acquisition Parameters
Date_    2011005
Time     0.00
INSTRUM  varian
PROBHD   zBp01
PULPROG  zgpg30
TD        65536
SOLVENT  CDCl3
NS        1888
DS        0
SWH       25510.203 Hz
FIDRES    0.388255 Hz
AQ        1.3107700 sec
RG        4
DM        19.600 usec
DE        115.71 usec
TE        299.0 K

FC - Processing parameters
SI        65536
SF        100.5218604 MHz
WCM       EM
SGB       0
LB        0.30 Hz
GB        0
PC        1.00
  
```

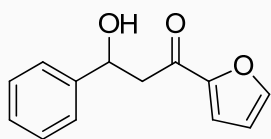

**3k**

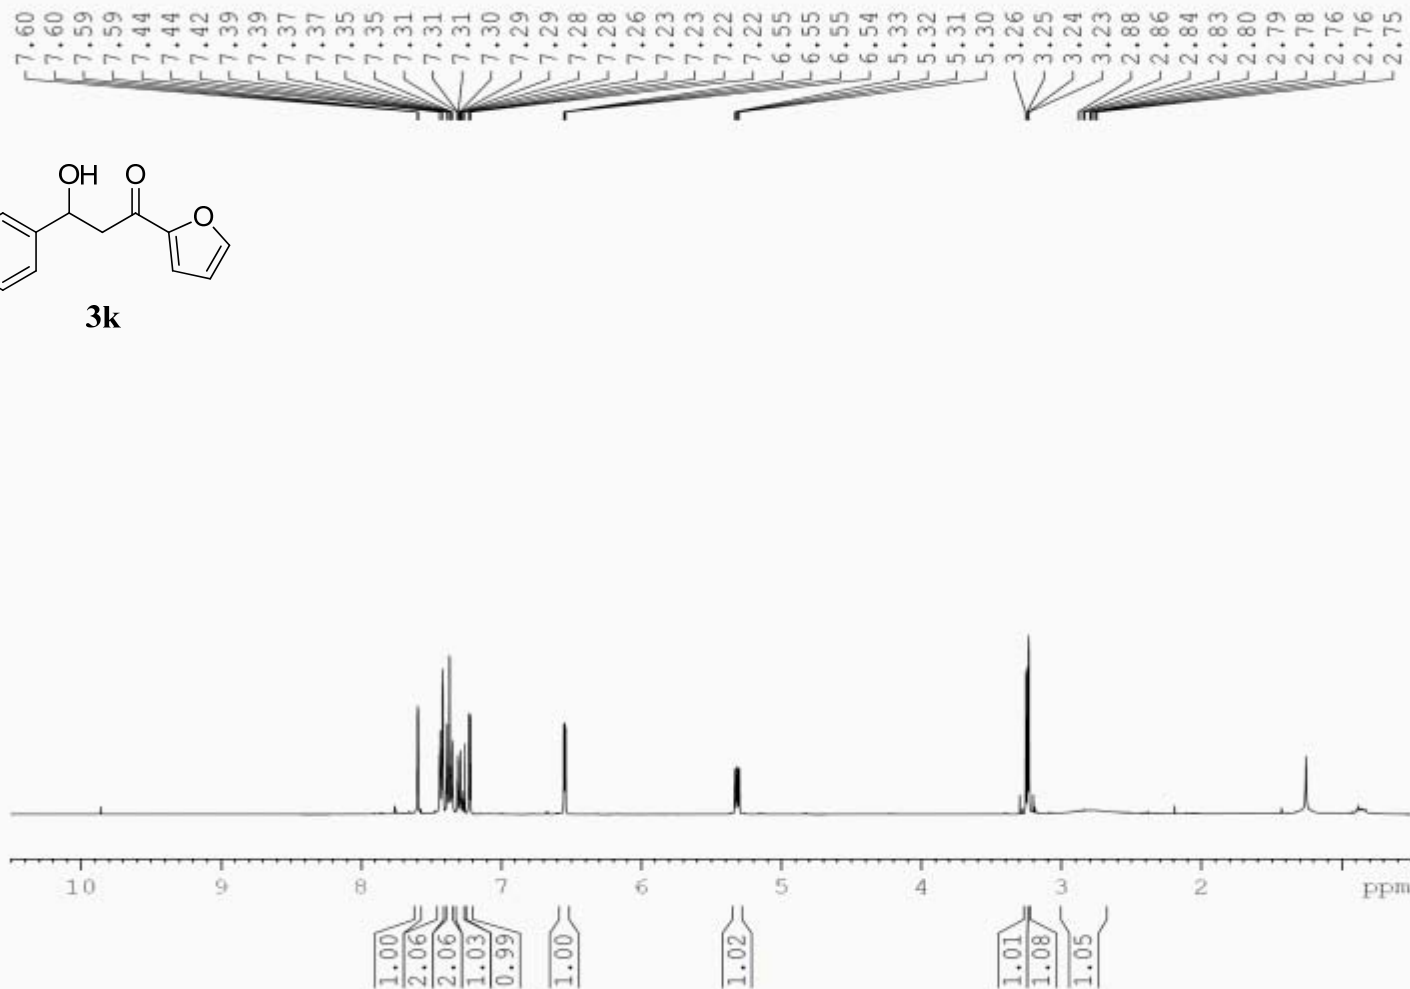

```

Current Data Parameters
NAME      RA-FU-OH.fid
EXPNO    1
PROCNO    1

F2 - Acquisition Parameters
Date_     20131007
Time      0.00
INSTRUM   varian
PROBHD
PULPROG   zgpg30
TD         32768
SOLVENT   odcl3
NS         12
DS         0
SWH        6410.256 Hz
FIDRES     0.195625 Hz
AQ         2.5555540 sec
RG         4
DW         78.000 usec
DE         115.71 usec
TE         298.0 K

F2 - Processing parameters
SI         32768
SF         399.7627605 MHz
WDW        EM
SSB        0
LB         0.30 Hz
GB         0
PC         1.00
  
```

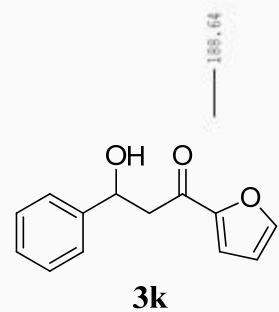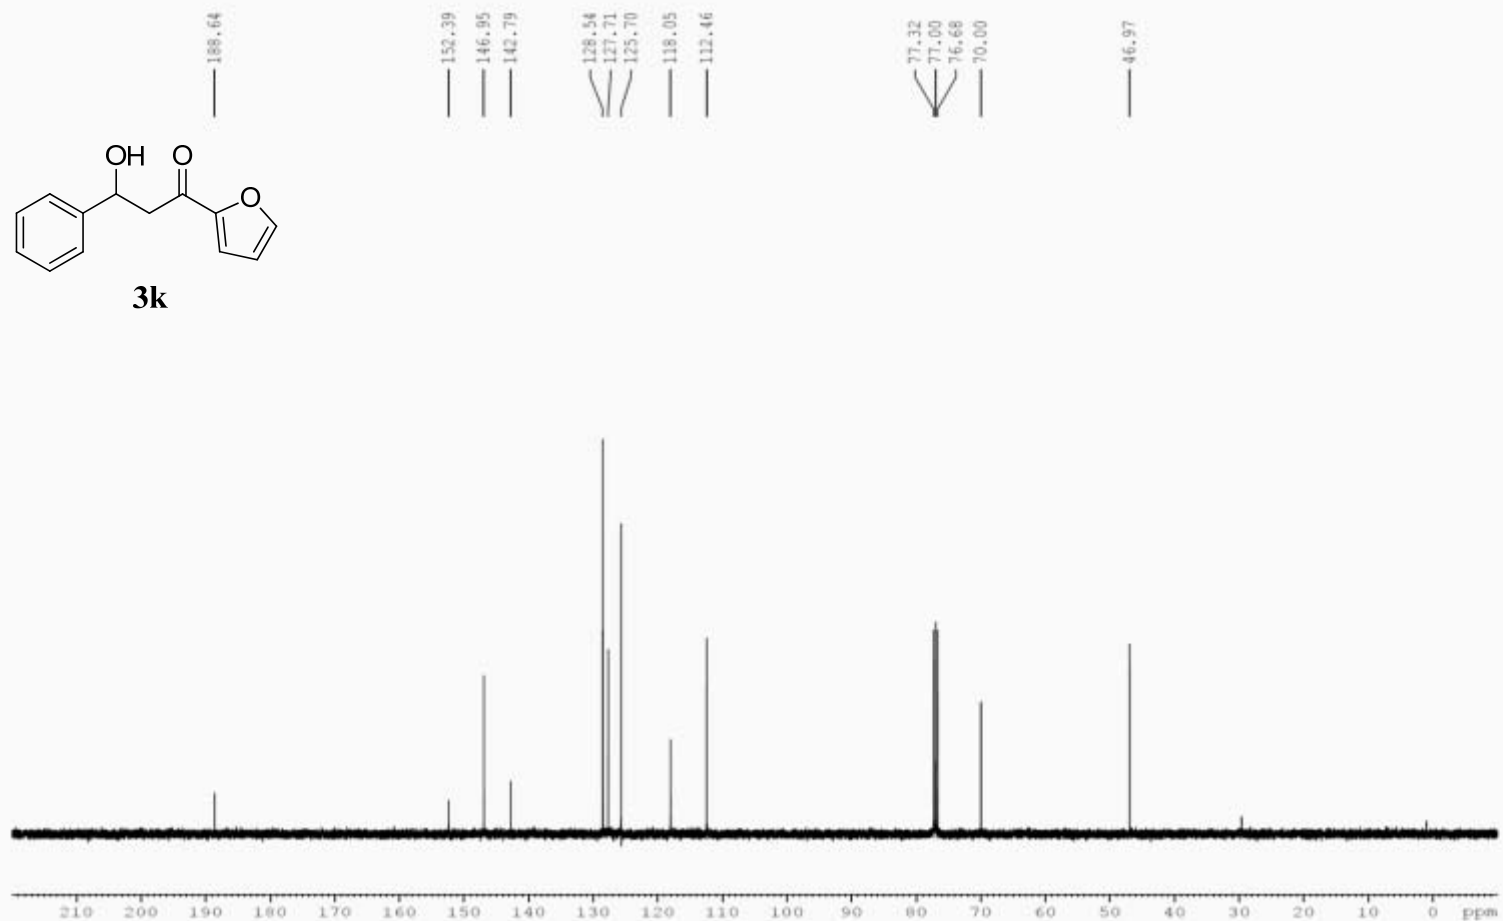

Current Data Parameters  
NAME RA-FU-OH-C.fid  
EXPNO 1  
PROCNO 1

F2 - Acquisition Parameters  
Date\_ 20131007  
Time 0.00  
INSTRUM varian  
PROBHD  
PULPROG zgpg30  
TD 65536  
SOLVENT cdcl3  
NS 254  
DS 0  
SWH 25510.203 Hz  
FIDRES 0.389255 Hz  
AQ 1.3107700 sec  
RG 4  
DW 19.600 usec  
DE 115.71 usec  
TE 298.0 K

F2 - Processing parameters  
SI 65536  
SF 100.5219589 MHz  
WDW EM  
SSB 0  
LB 0.30 Hz  
GB 0  
PC 1.00

0805

Pulse Sequence: s2pul  
UNITYplus-400 "unity400"  
Date: Aug 28 2013  
Solvent: CDCl3  
Ambient temperature  
Total 32 repetitions

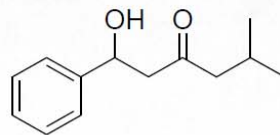

**31**

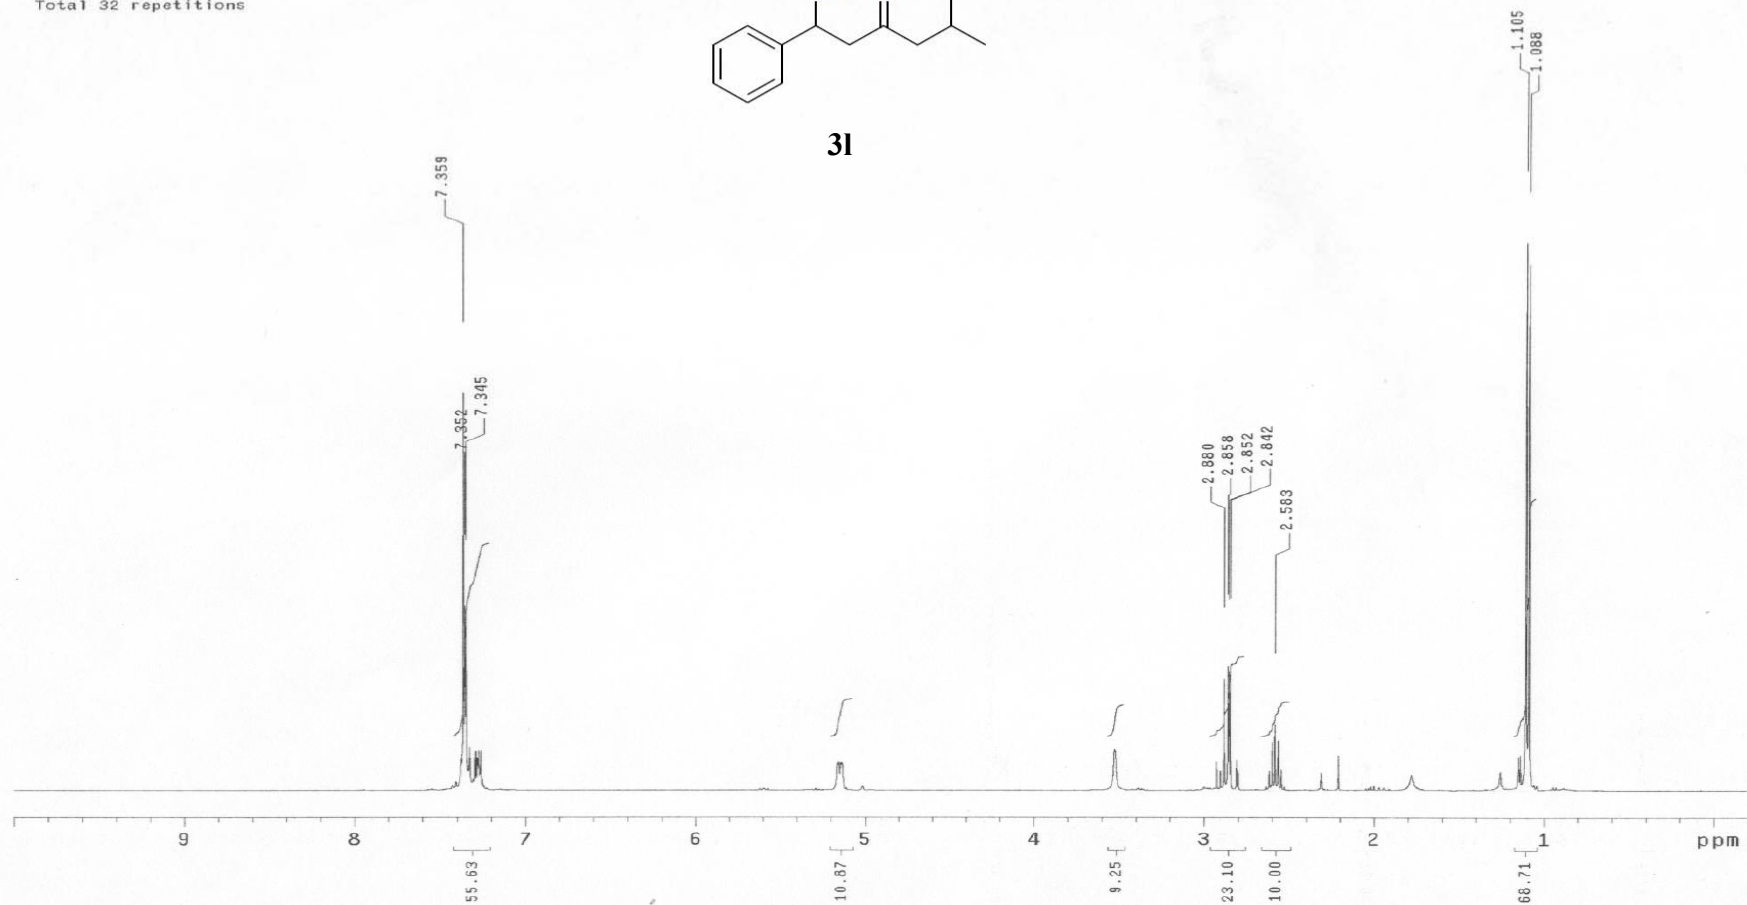

0805

Pulse Sequence: s2pu1  
UNITYplus-400 "unity400"  
Date: Aug 23 2013  
Solvent: CDCl3  
Ambient temperature  
Total 608 repetitions

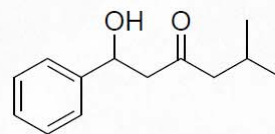

31

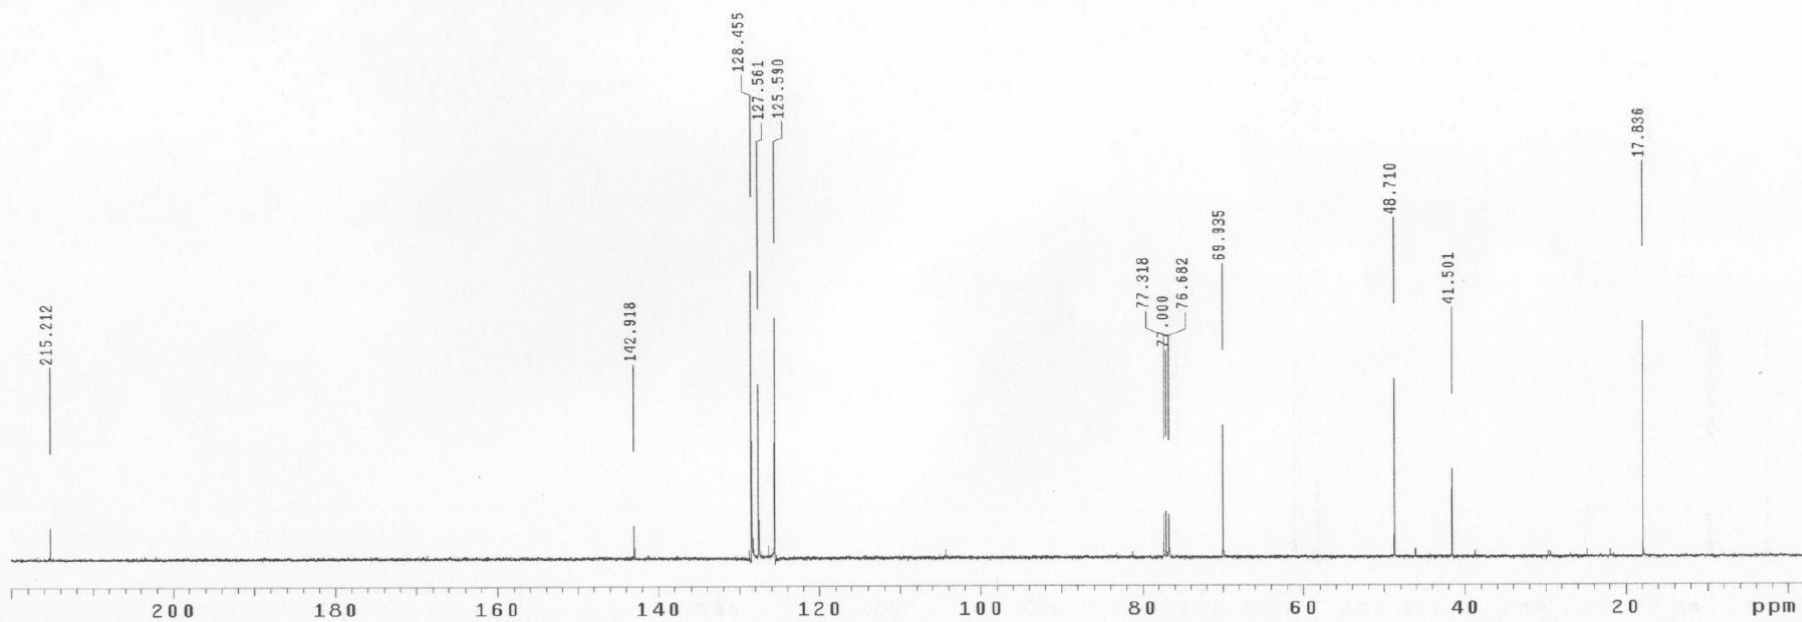

1008

Pulse Sequence: s2pu1  
UNITYplus-400 "unity400"  
Date: Oct 11 2013  
Solvent: CDCl3  
Ambient temperature  
Total 104 repetitions

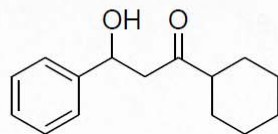

**3m**

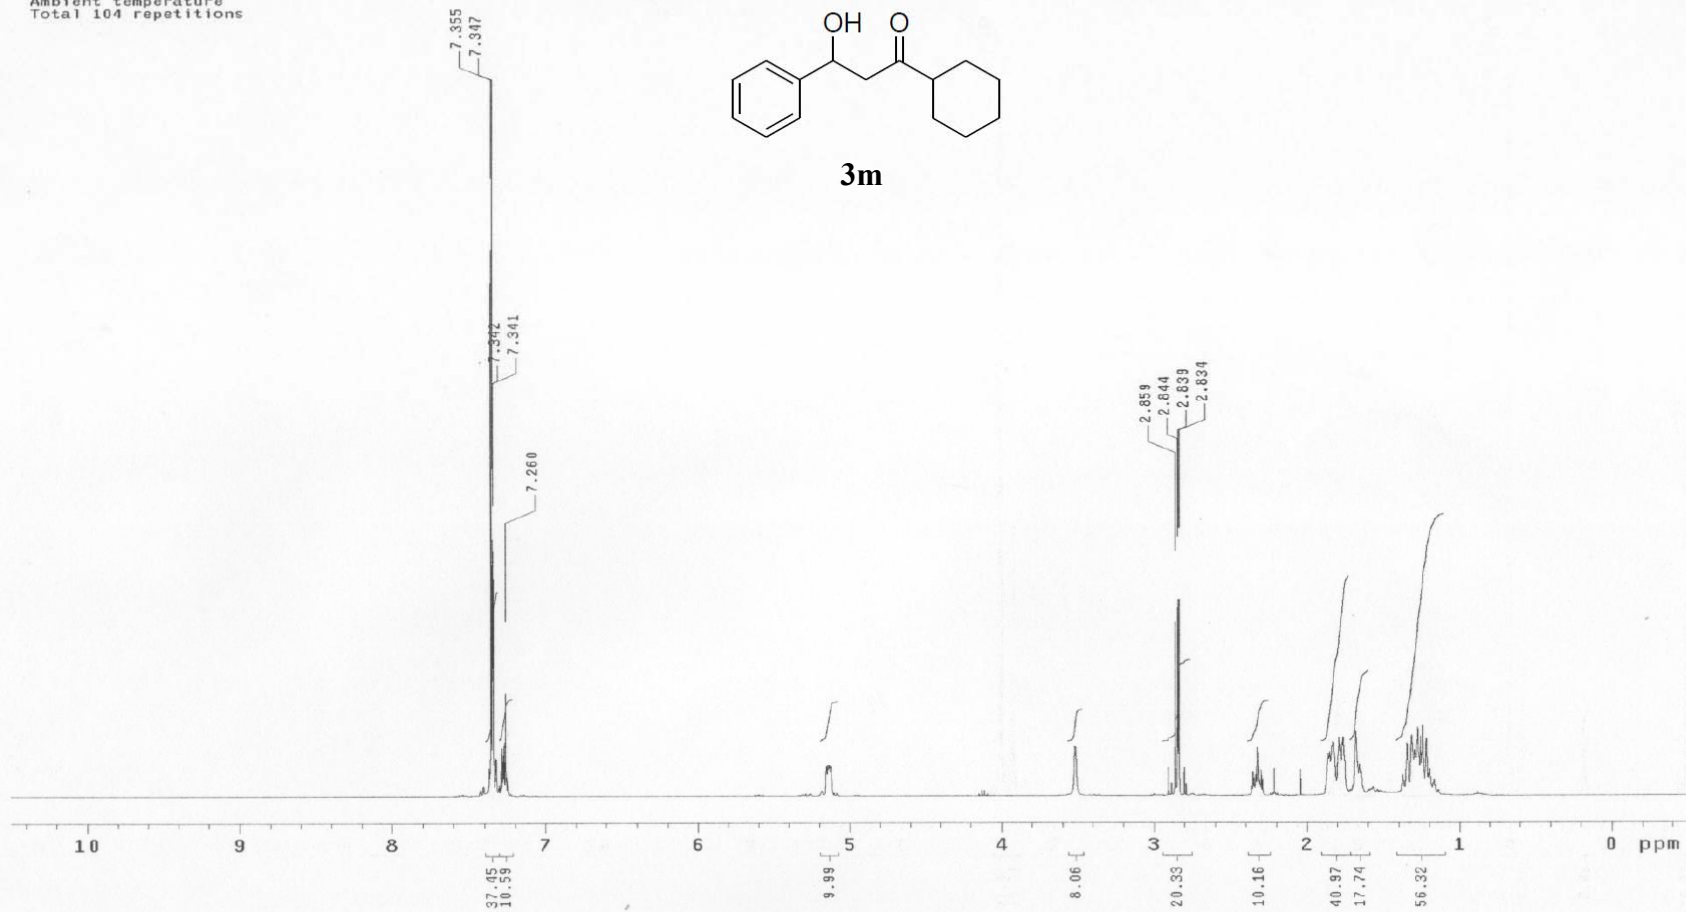

0829

Pulse Sequence: s2pu1  
UNITYplus-400 "unity400"  
Date: Sep 5 2013  
Solvent: CDCl3  
Ambient temperature  
Total 2480 repetitions

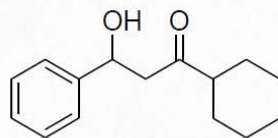

**3m**

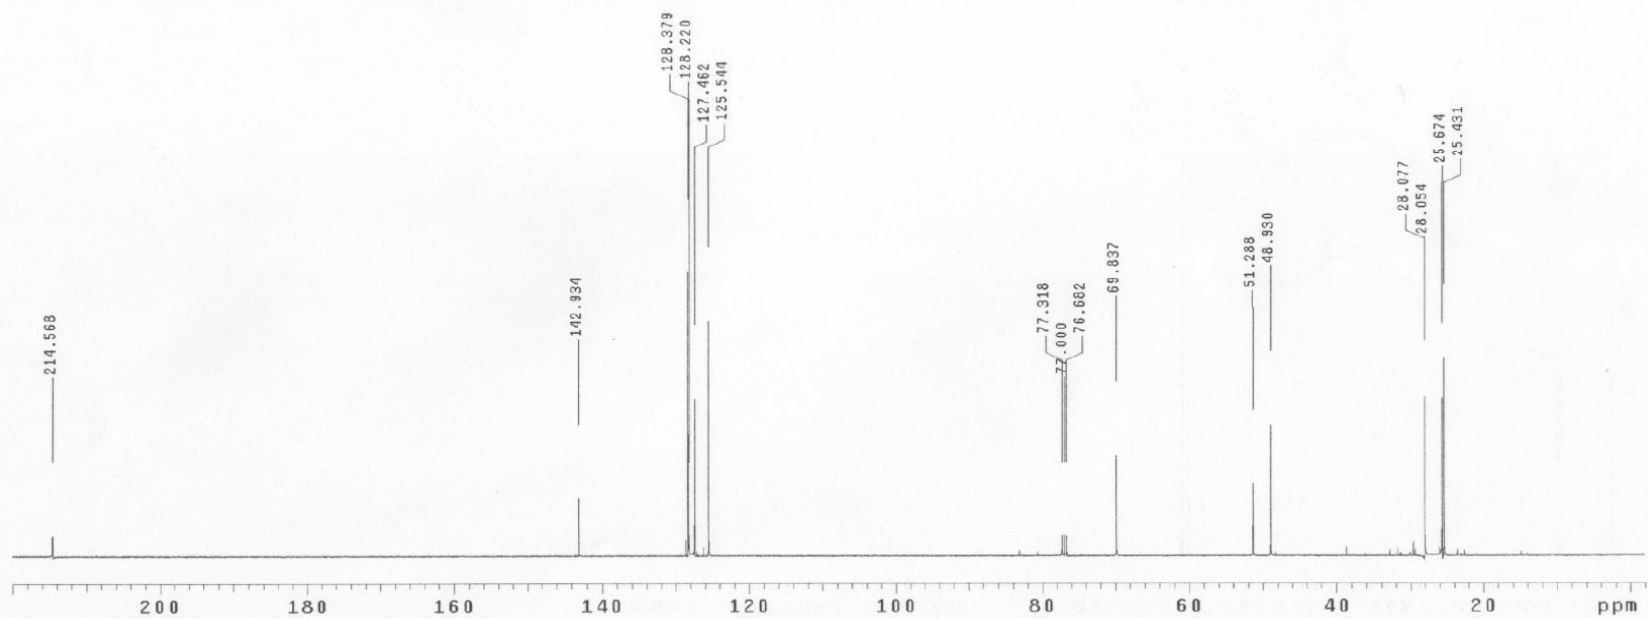



0906

Pulse Sequence: s2pu1

Solvent: CDCl3

Ambient temperature

Mercury-400BB "MercuryPlus400"

Pulse 48.1 degrees

Acq. time 4.002 sec

Width 5995.2 Hz

32 repetitions

OBSERVE H1, 400.3978961 MHz

DATA PROCESSING

Line broadening 0.1 Hz

FT size 65536

Total time 2 min, 33 sec

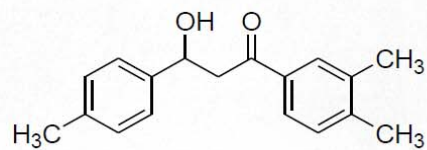

3n

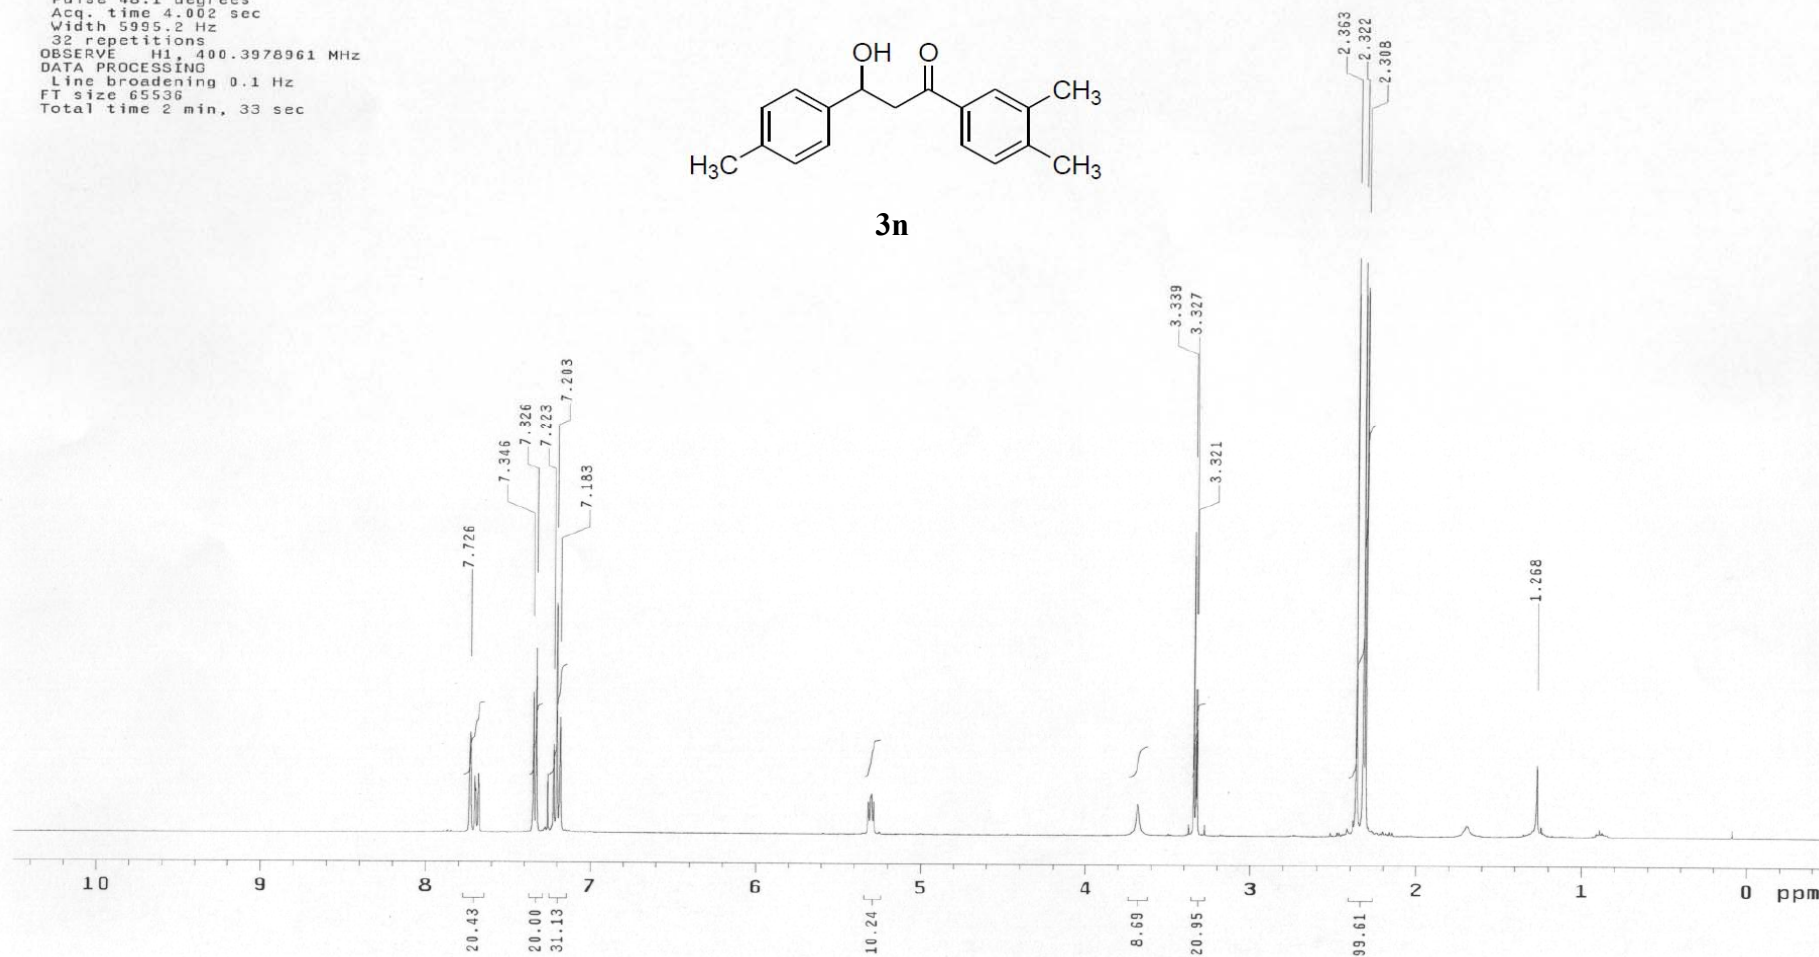

0906

Pulse Sequence: s2pul  
Solvent: CDCl3  
Ambient temperature  
Mercury-400BB "MercuryPlus400"

Pulse 68.7 degrees  
Acq. time 1.000 sec  
Width 25000.0 Hz  
1364 repetitions  
OBSERVE C13, 100.6801353 MHz  
DECOUPLE H1, 400.3999572 MHz  
Power 38 dB  
continuously on  
WALTZ-16 modulated  
DATA PROCESSING  
Line broadening 1.0 Hz  
FT size 65536  
Total time 8 hr, 44 min, 37 sec

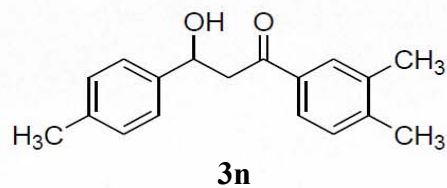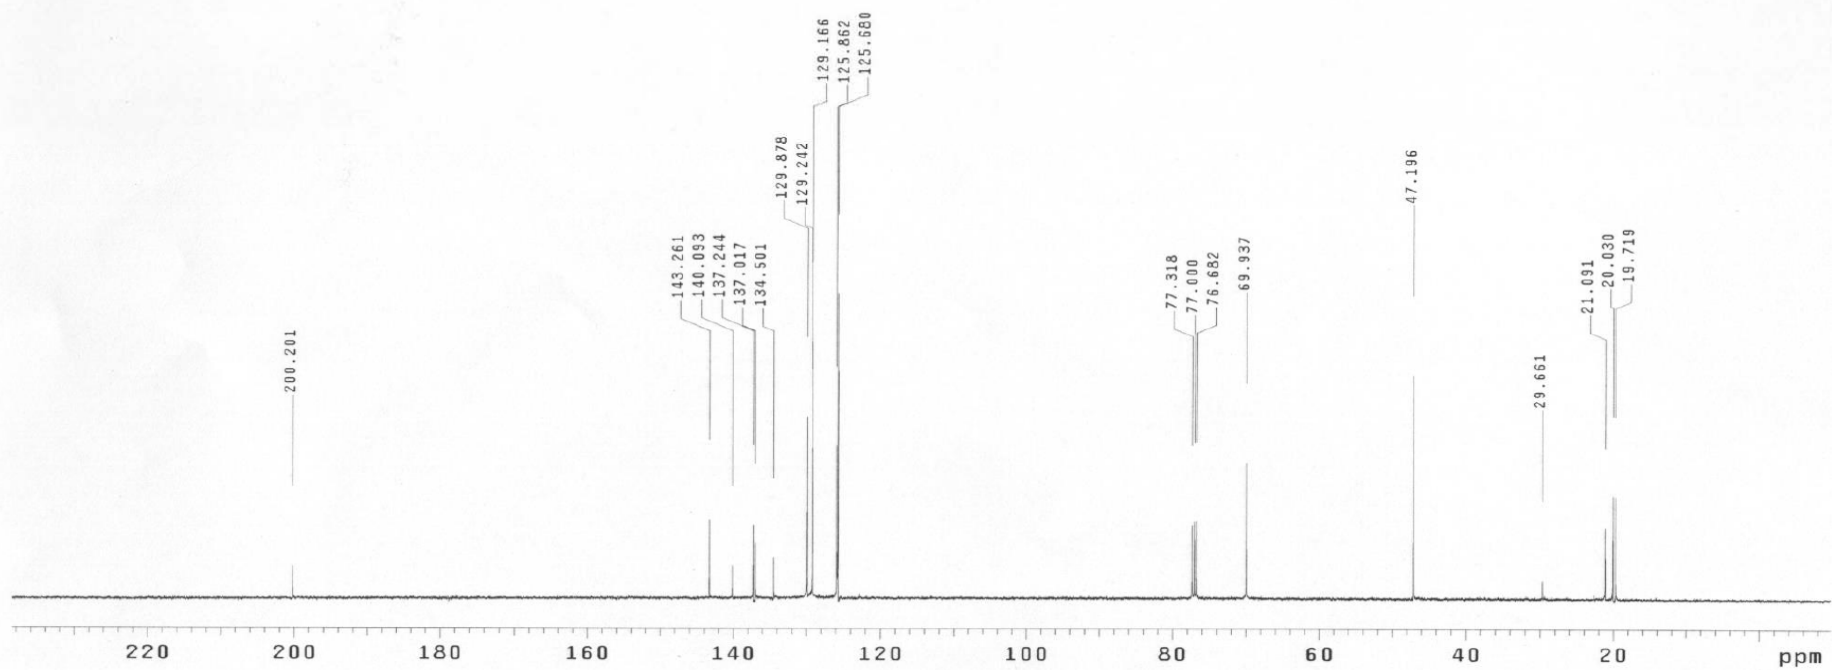

0904

Pulse Sequence: s2pul

Solvent: CDC13

Ambient temperature

Mercury-400BB "MercuryPlus400"

Pulse 48.1 degrees

Acq. time 4.002 sec

Width 5995.2 Hz

32 repetitions

OBSERVE H1, 400.3978959 MHz

DATA PROCESSING

FT size 65536

Total time 2 min, 33 sec

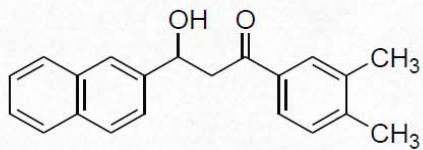

30

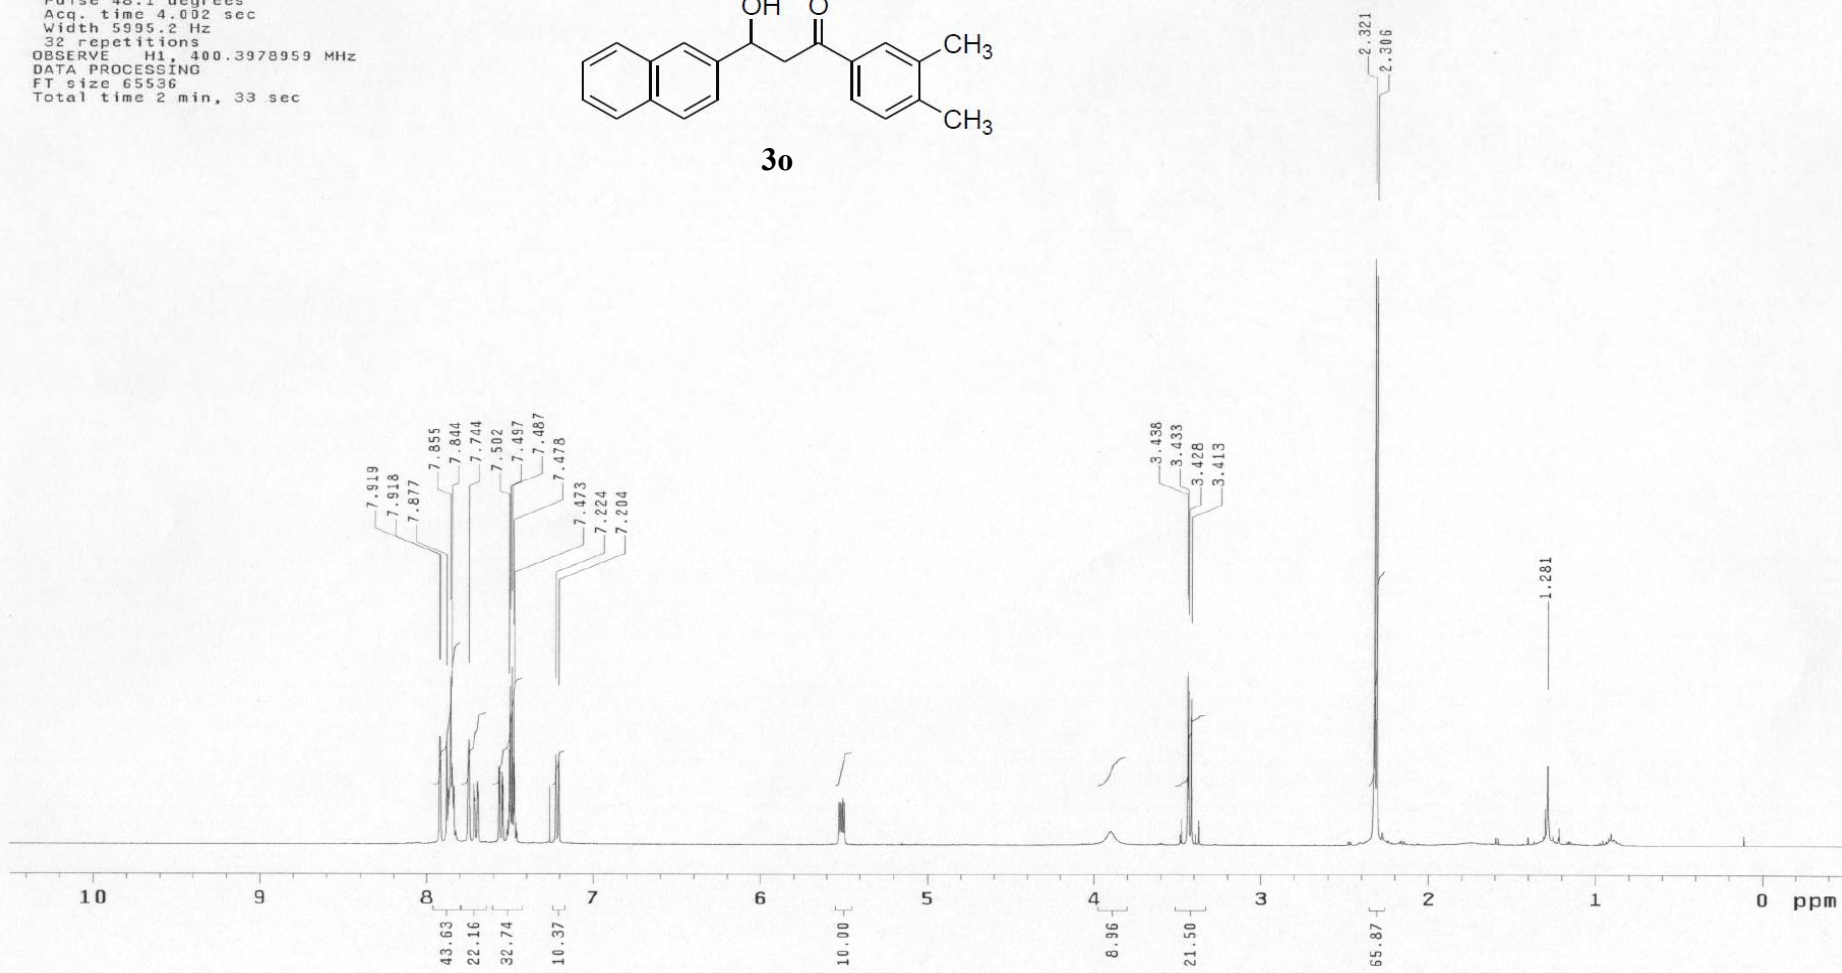

0904

Pulse Sequence: s2pu1  
Solvent: CDCl3  
Ambient temperature  
Mercury-400BB "MercuryPlus400"

Pulse 68.7 degrees  
Acq. time 1.000 sec  
Width 25000.0 Hz  
320 repetitions  
OBSERVE C13, 100.6801376 MHz  
DECOUPLE H1, 400.3999572 MHz  
Power 38 dB  
Continuously on  
WALTZ-16 modulated  
DATA PROCESSING  
Line broadening 1.0 Hz  
FT size 65536  
Total time 21 hr, 51 min, 34 sec

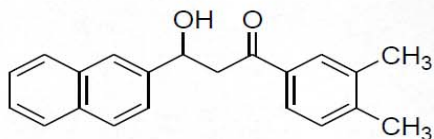

30

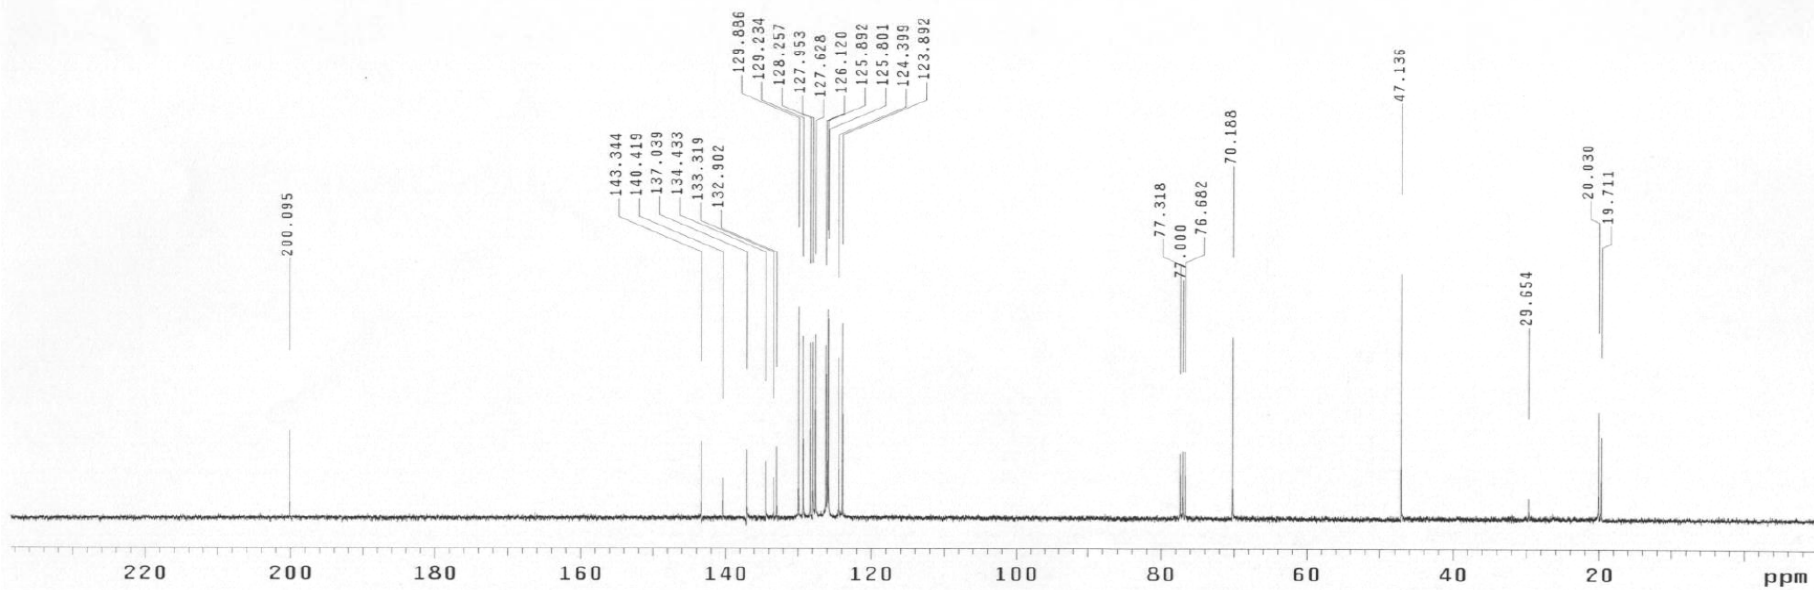

0903

Pulse Sequence: s2pul  
Solvent: CDCl3  
Ambient temperature  
Mercury-400BB "MercuryPlus400"

Pulse 48.1 degrees  
Acq. time 4.002 sec  
Width 5995.2 Hz  
32 repetitions  
OBSERVE H1, 400.3978963 MHz  
DATA PROCESSING  
FT size 65536  
Total time 2 min, 33 sec

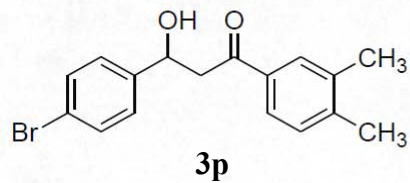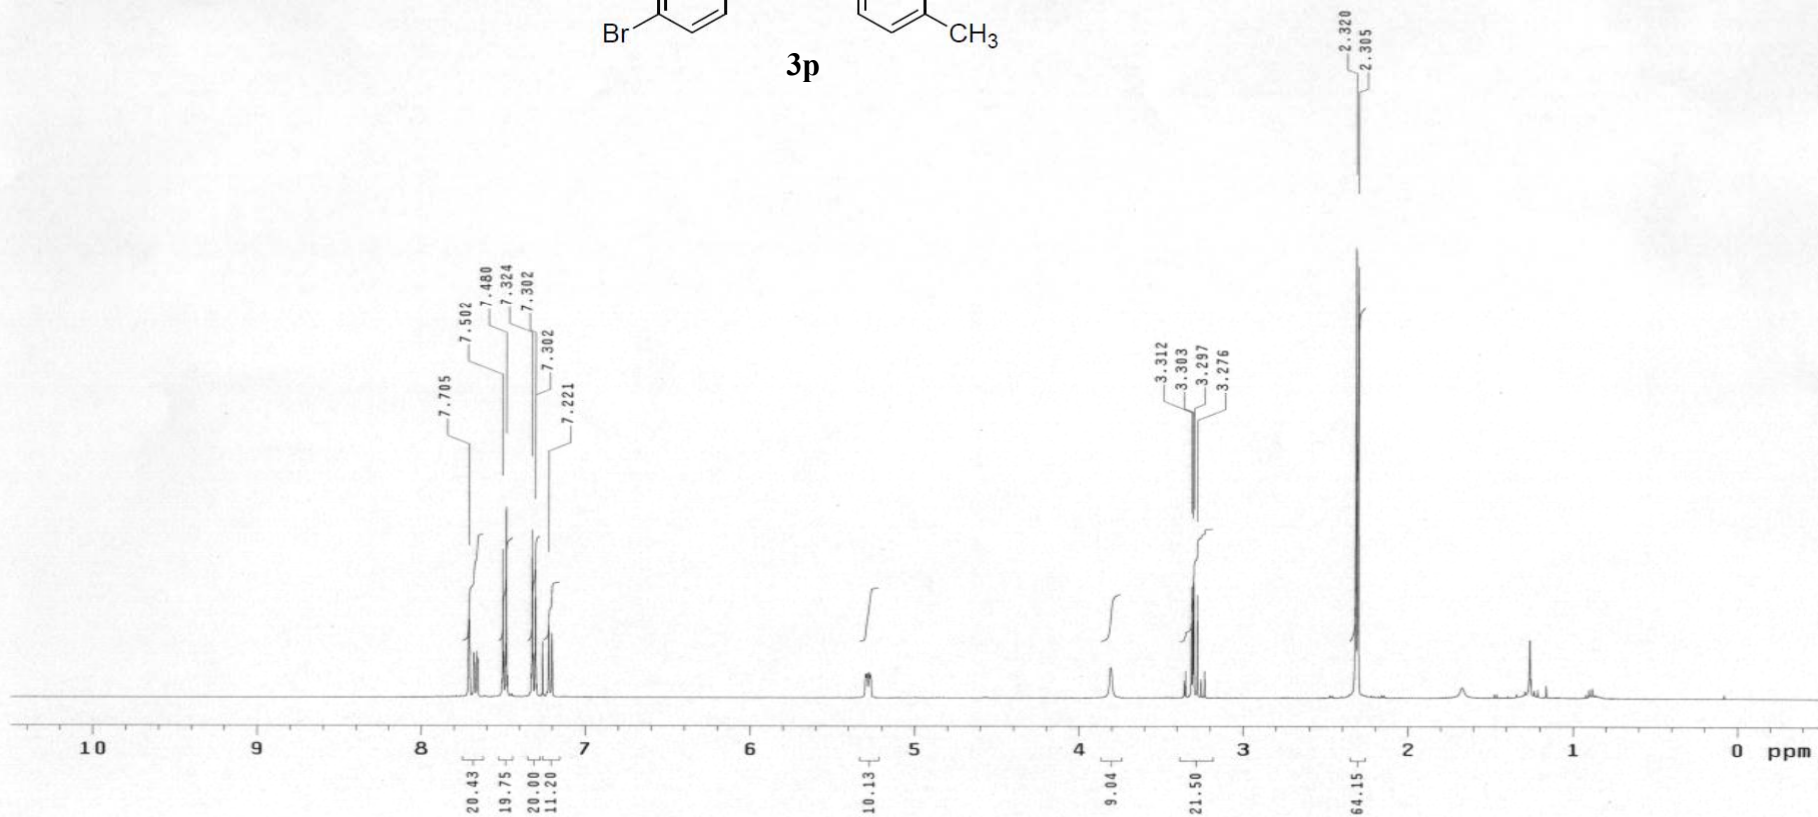

0903

Pulse Sequence: s2pu1  
Solvent: CDC13  
Ambient temperature  
Mercury-400BB "MercuryPlus400"

Pulse 68.7 degrees  
Acq. time 1.000 sec  
Width 25000.0 Hz  
432 repetitions  
OBSERVE C13, 100.6801346 MHz  
DECOUPLE H1, 400.3999572 MHz  
Power 38 dB  
Continuously on  
WALTZ-16 modulated  
DATA PROCESSING  
Line broadening 1.0 Hz  
FT size 65536  
Total time 21 hr, 51 min, 34 sec

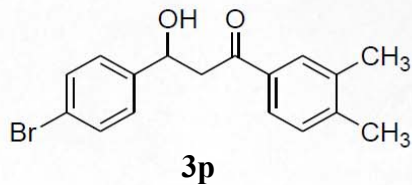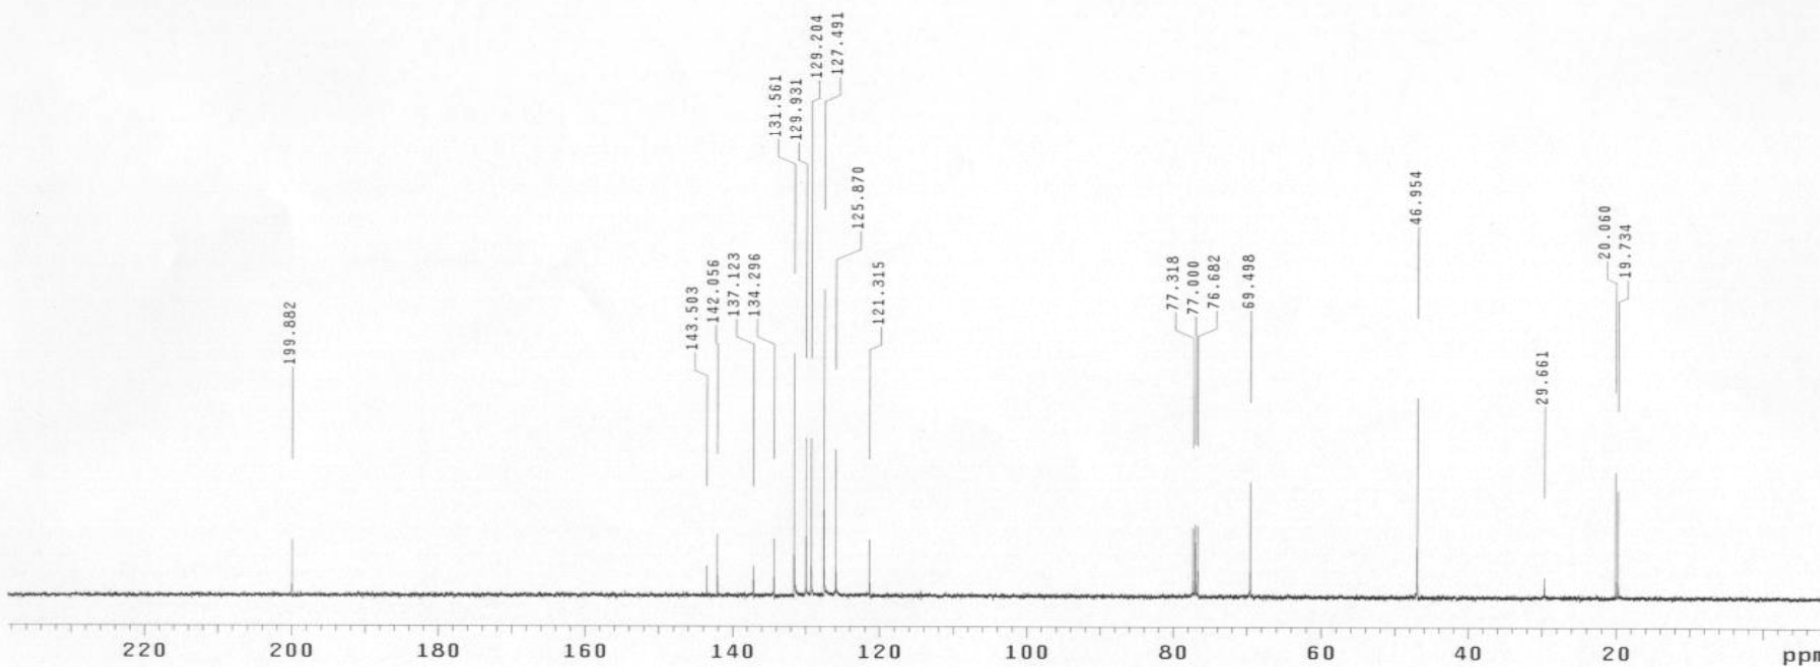

0905

Pulse Sequence: s2pu1  
Solvent: CDCl3  
Ambient temperature  
Mercury-400BB "MercuryPlus400"

Pulse 48.1 degrees  
Acq. time 4.002 sec  
Width 5995.2 Hz  
64 repetitions  
OBSERVE H1, 400.3978963 MHz  
DATA PROCESSING  
Line broadening 0.1 Hz  
FT size 65536  
Total time 5 min, 7 sec

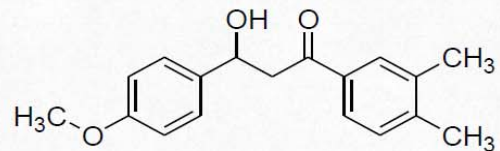

3q

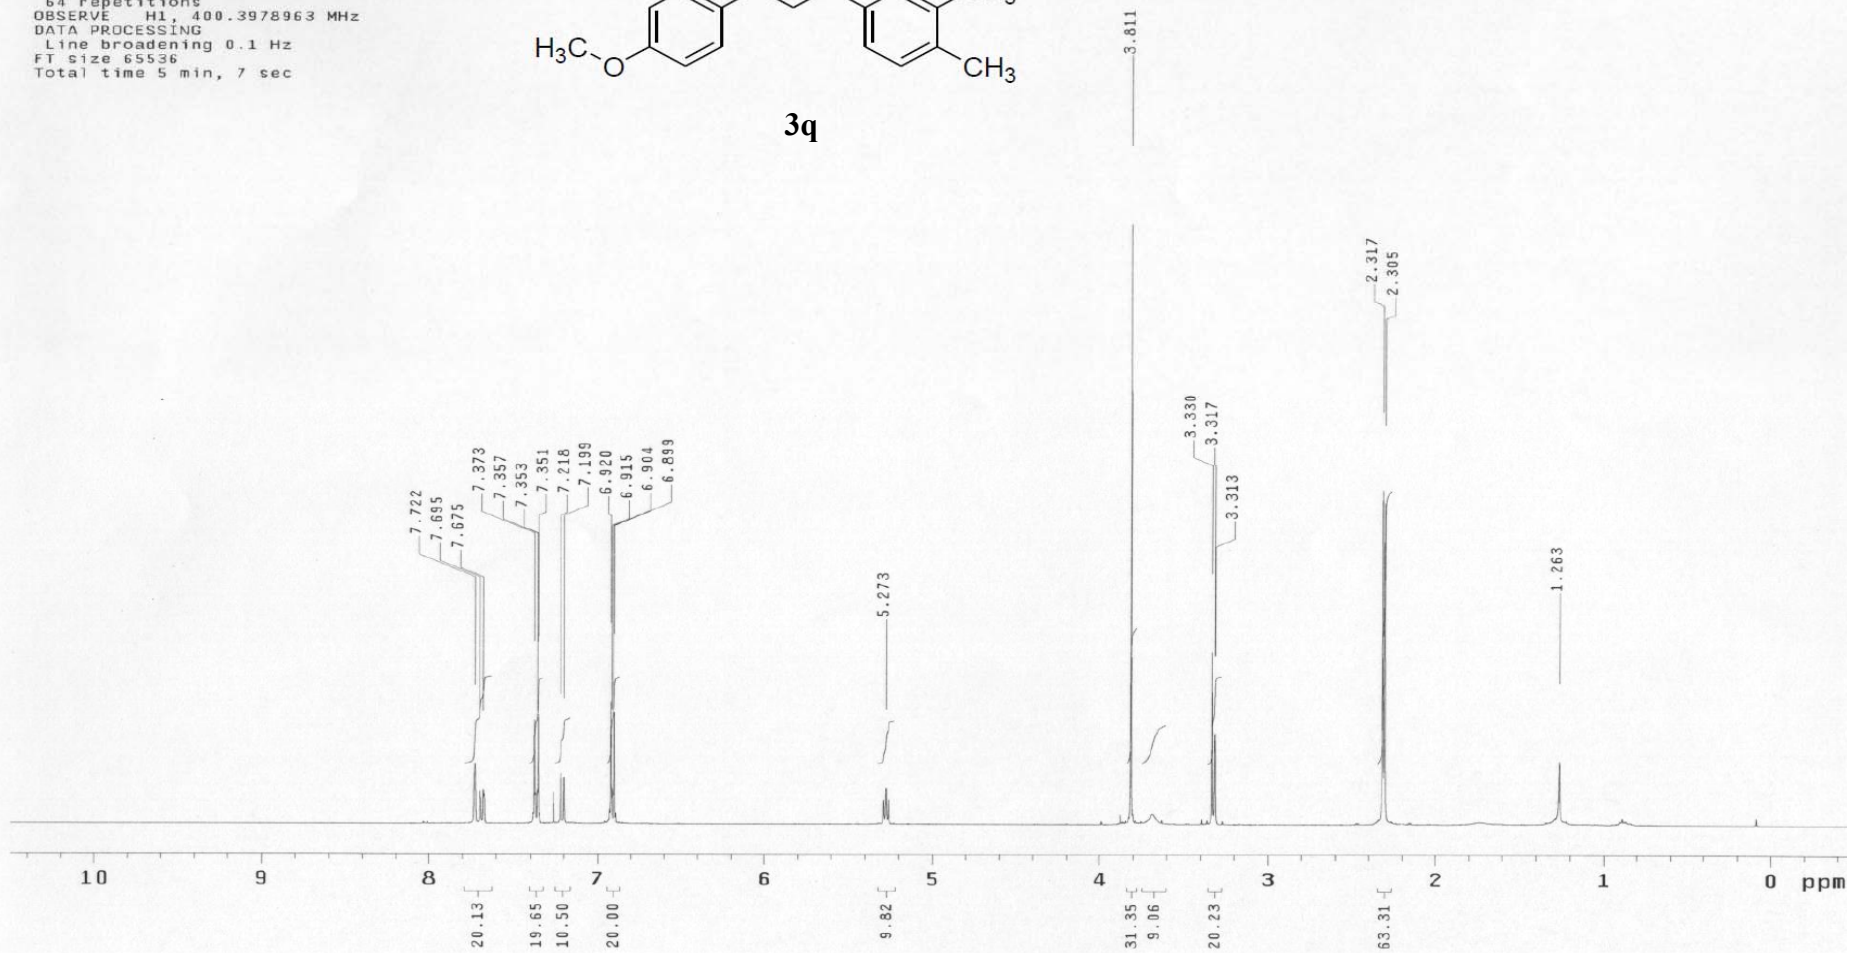

0905

Pulse Sequence: s2pu1

Solvent: CDCl3

Ambient temperature

Mercury-400BB "MercuryPlus400"

Pulse 68.7 degrees

Acq. time 1.000 sec

Width 25000.0 Hz

1024 repetitions

OBSERVE C13, 100.6801361 MHz

DECOUPLE H1, 400.3999572 MHz

Power 38 dB

continuously on

WALTZ-16 modulated

DATA PROCESSING

Line broadening 1.0 Hz

FT size 65536

Total time 8 hr, 44 min, 37 sec

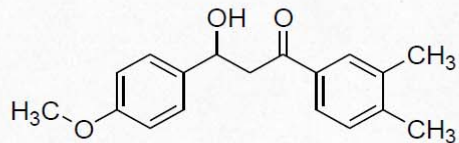

3q

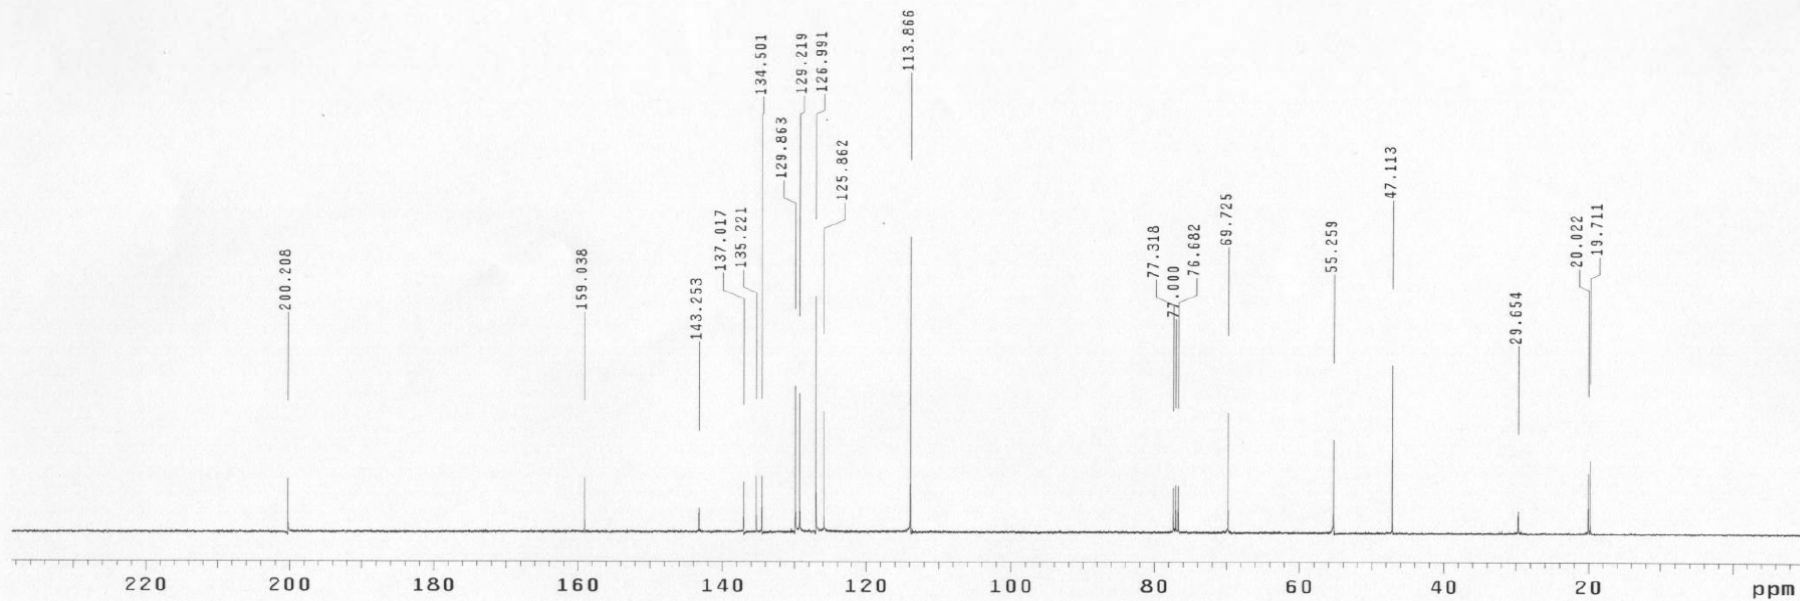



0827

Pulse Sequence: s2pu1  
UNITYplus-400 "unity400"  
Date: Sep 5 2013  
Solvent: CDCl3  
Ambient temperature  
Total 32 repetitions

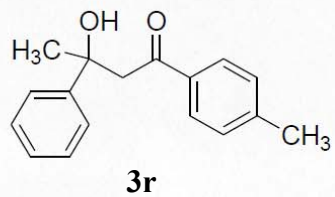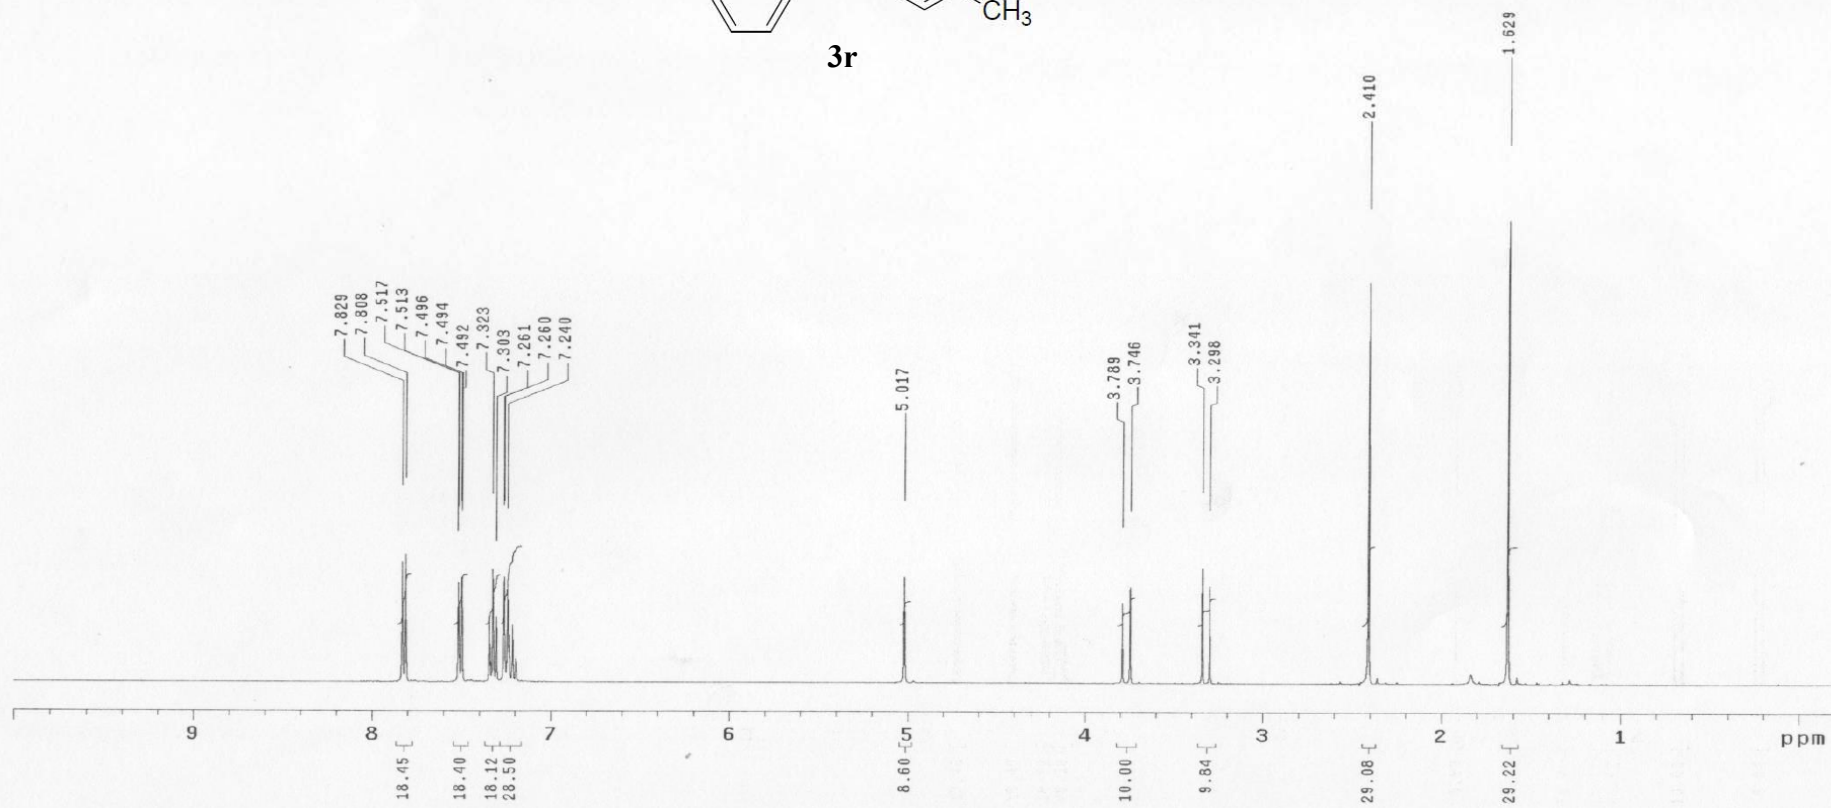

0827

Pulse Sequence: s2pu1  
UNITYplus-400 "unity400"  
Date: Sep 5 2013  
Solvent: CDCl3  
Ambient temperature  
Total 320 repetitions

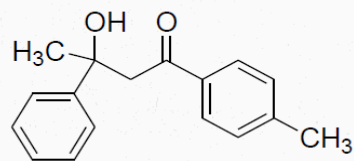

3r

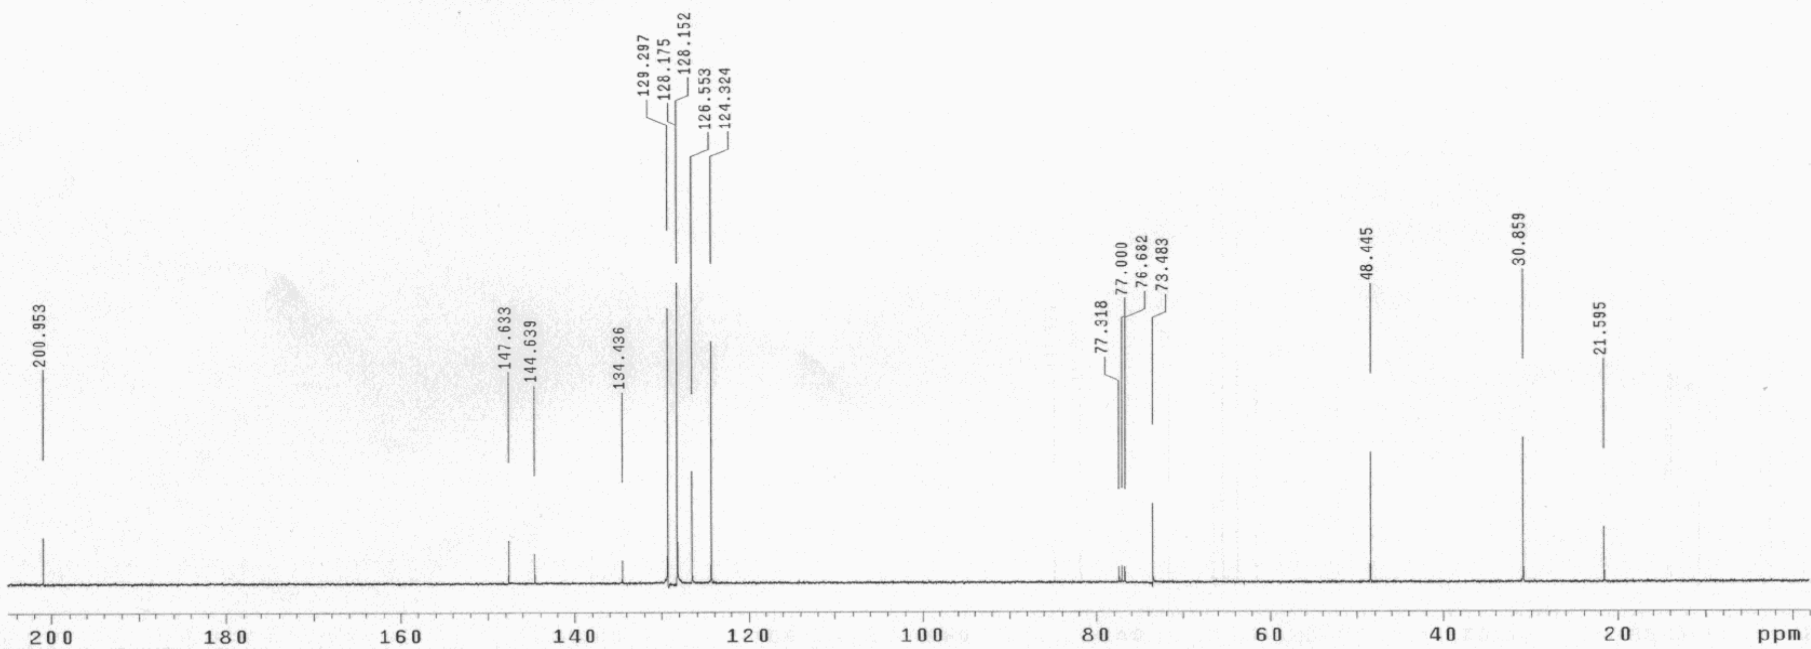

0828

Pulse Sequence: s2pul  
UNITYplus-400 "unity400"  
Date: Sep 5 2013  
Solvent: CDCl<sub>3</sub>  
Ambient temperature  
Total 32 repetitions

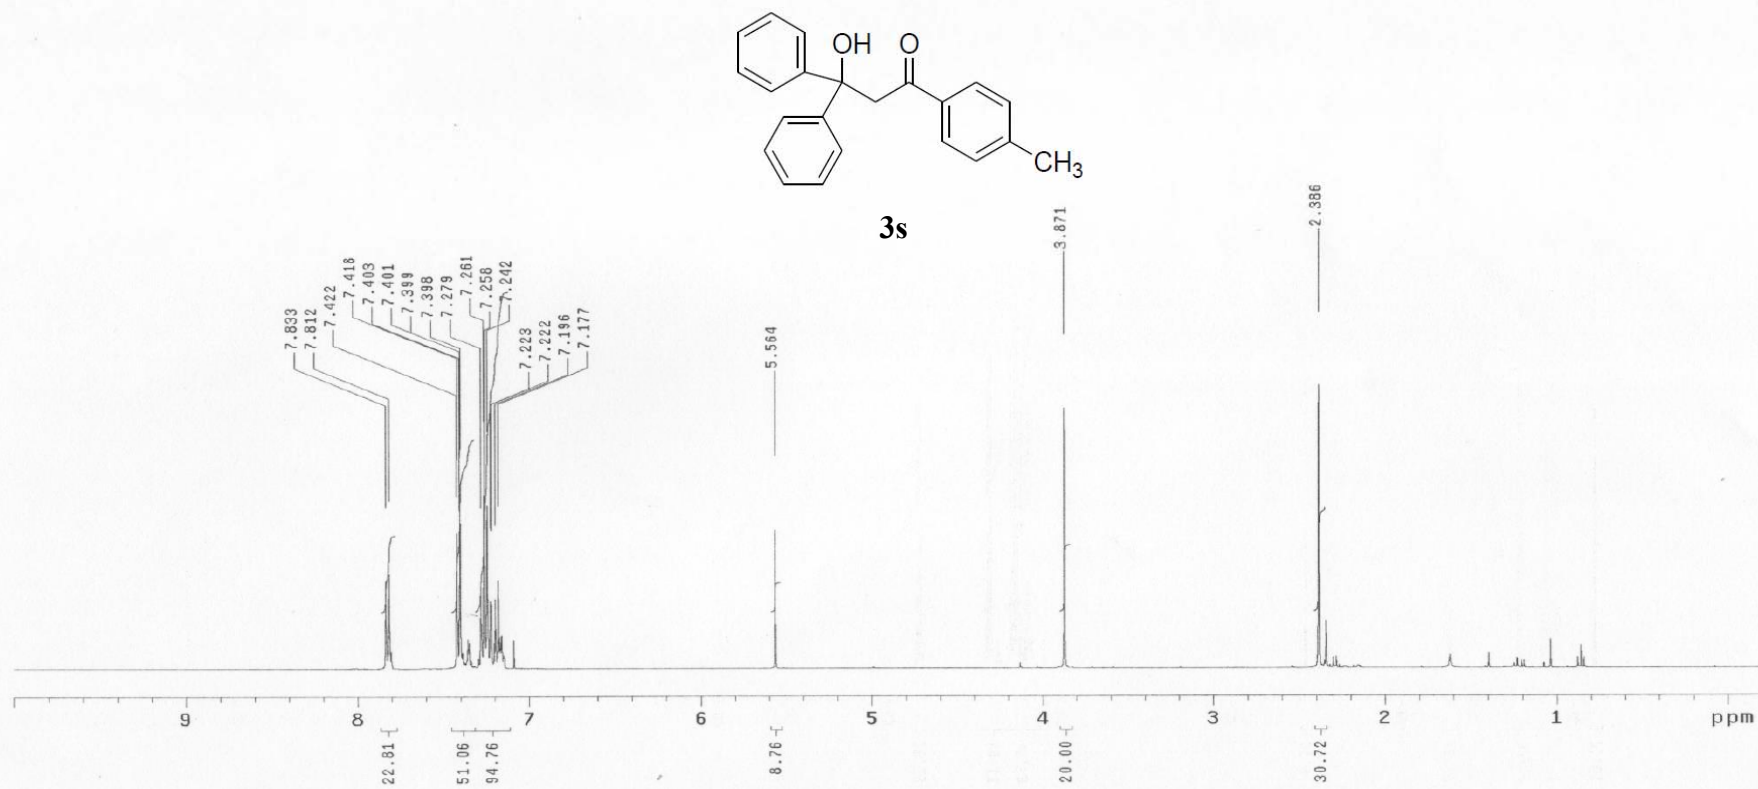

0828  
Pulse Sequence: s2pu1  
UNITYplus-400 "unity400"  
Date: Sep 5 2013  
Solvent: CDCl3  
Ambient temperature  
Total 432 repetitions

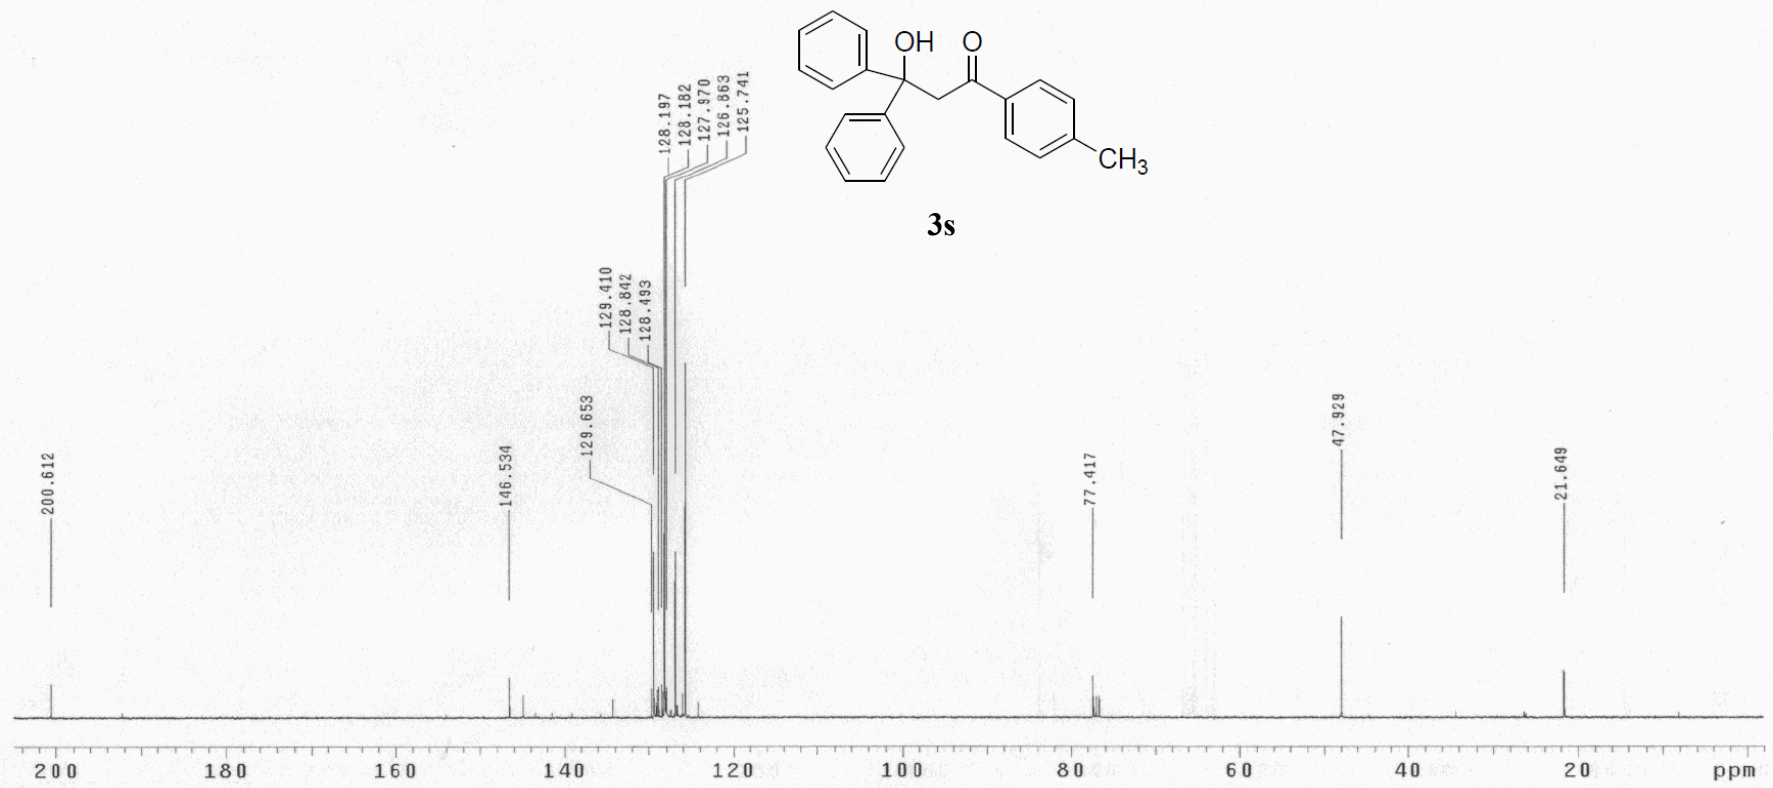

1009

Pulse Sequence: s2pu1  
UNITYplus-400 "unity400"  
Date: Oct 11 2013  
Solvent: CDCl3  
Ambient temperature  
Total 268 repetitions

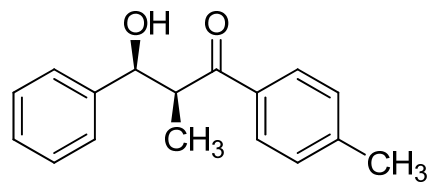

3t

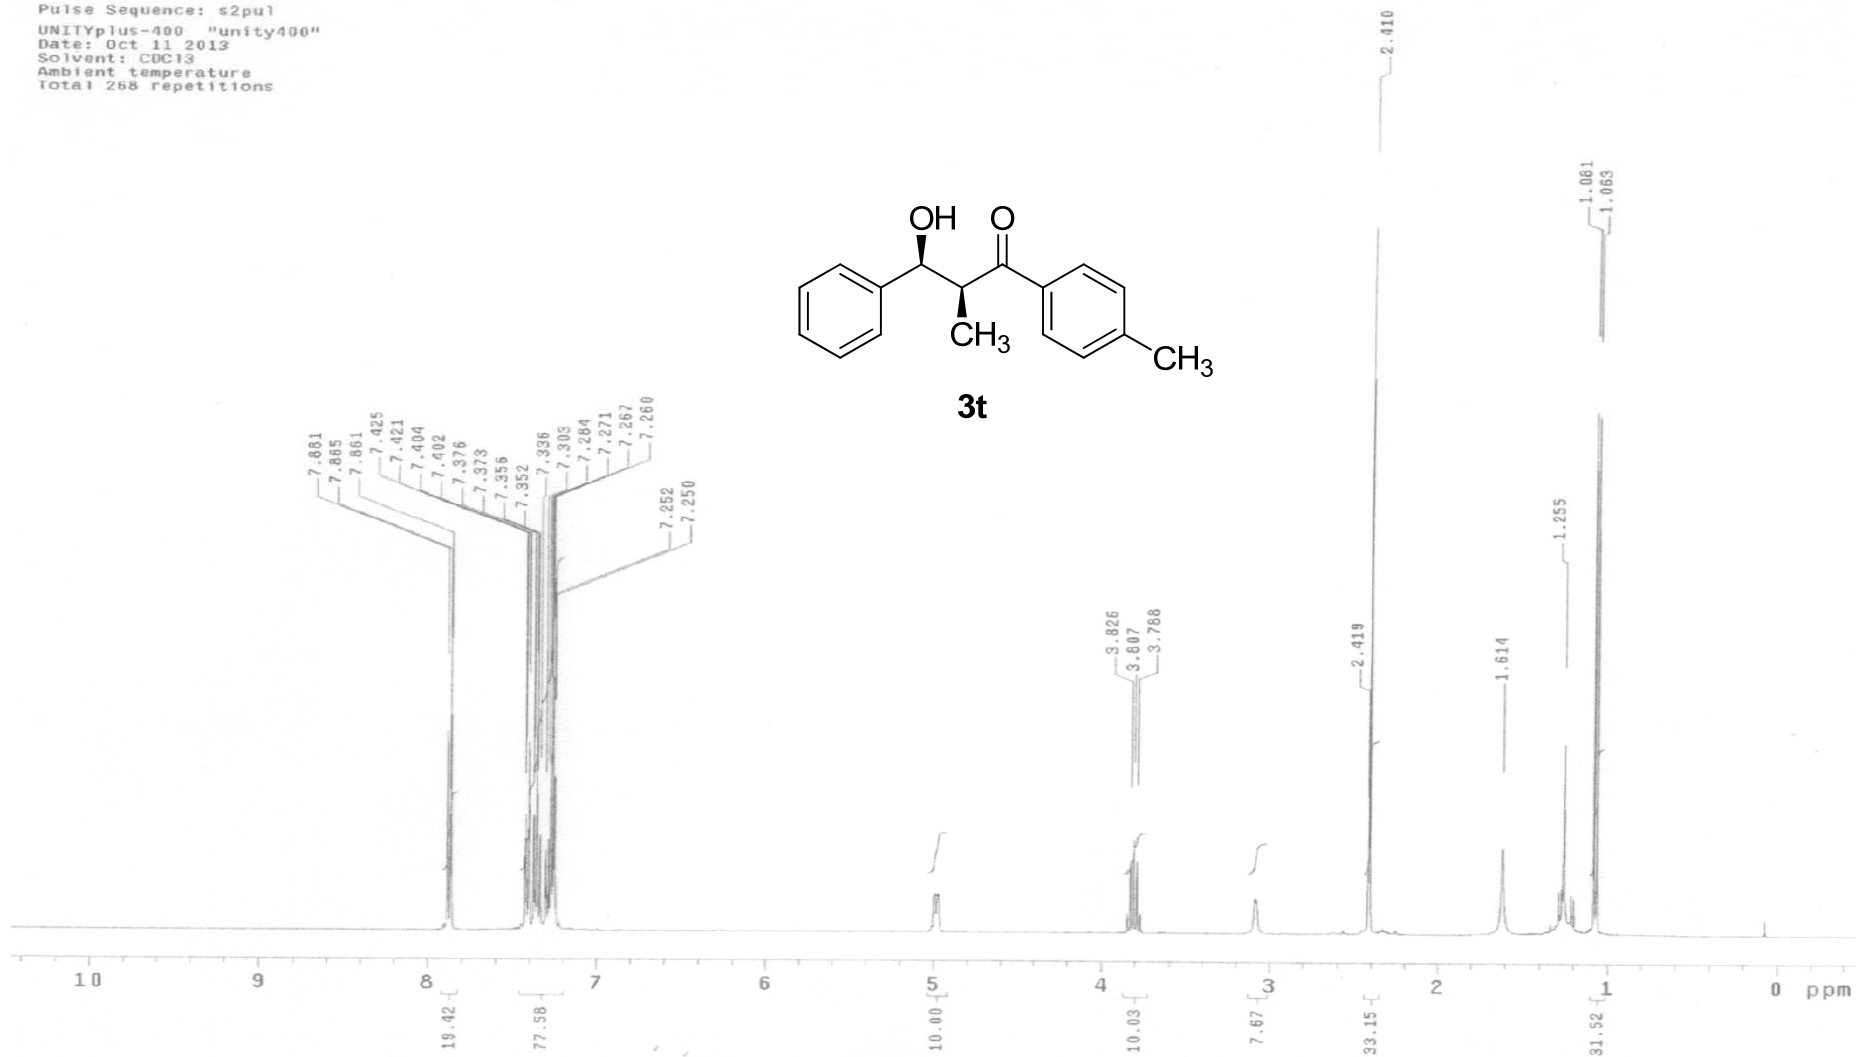

0921

Pulse Sequence: s2pu1  
Solvent: CDCl3  
Ambient temperature  
Mercury-400BB "MercuryPlus400"

Pulse 58.7 degrees  
Acq. time 1.000 sec  
Width 25000.0 Hz  
3760 repetitions  
OBSERVE C13, 100.6801323 MHz  
DECOUPLE H1, 400.3999572 MHz  
Power 38 dB  
continuously on  
WALTZ-16 modulated  
DATA PROCESSING  
Line broadening 1.0 Hz  
FT size 65536  
Total time 8 hr, 44 min, 37 sec

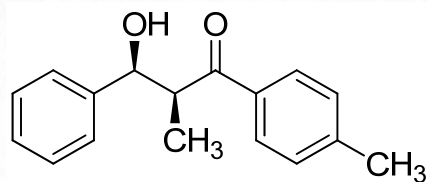

3t

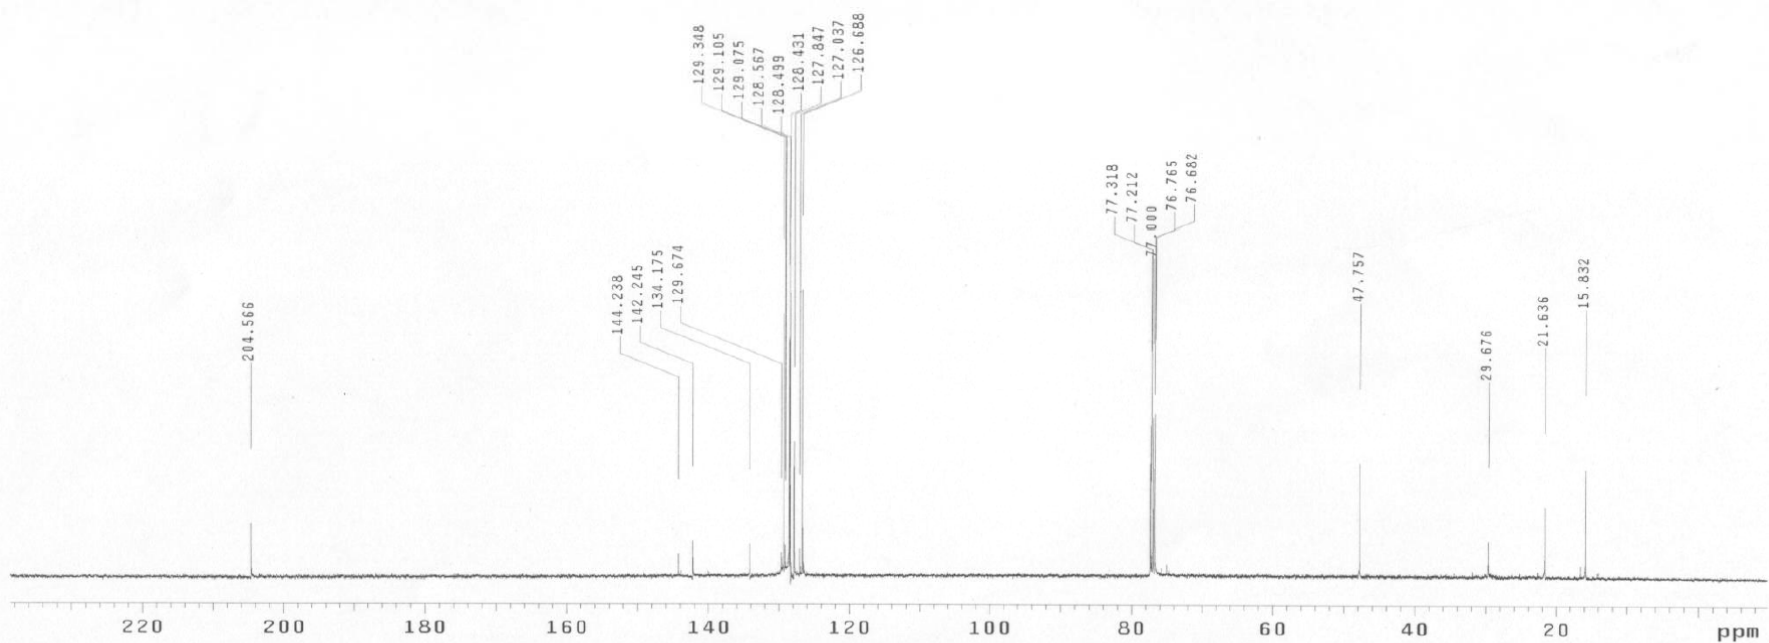

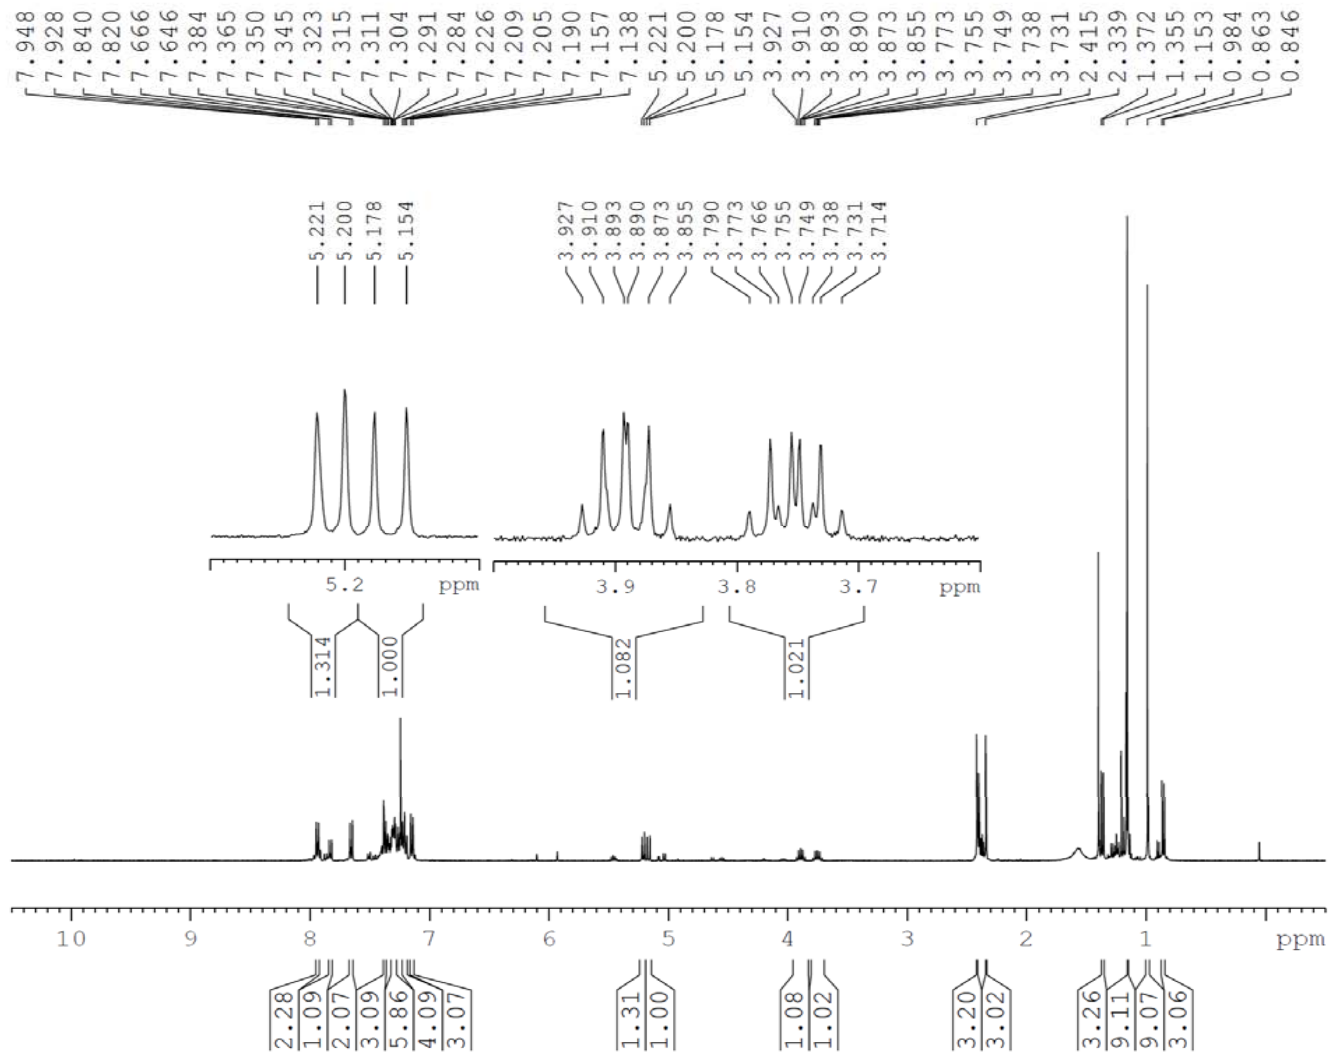

```

NAME          20141215
EXPNO         2
PROCNO        1
Date_         20141215
Time_         20.36
INSTRUM       spect
PROBHD        5 mm DUL 13C-1
PULPROG       zg30
TD            32768
SOLVENT       CDC13
NS            42
DS            0
SWH           6410.256 Hz
FIDRES        0.195625 Hz
AQ            2.5559540 sec
RG            4
DW            78.000 usec
DE            6.00 usec
TE            300.0 K
D1            2.00000000 sec
TD0           1
  
```

```

===== CHANNEL f1 =====
NUC1          1H
P1            10.00 usec
PL1           -2.40 dB
SFO1          400.1528010 MHz
SI            16384
SF            400.1500168 MHz
WDW           EM
SSB           0
LB            0.00 Hz
GB            0
PC            1.00
  
```

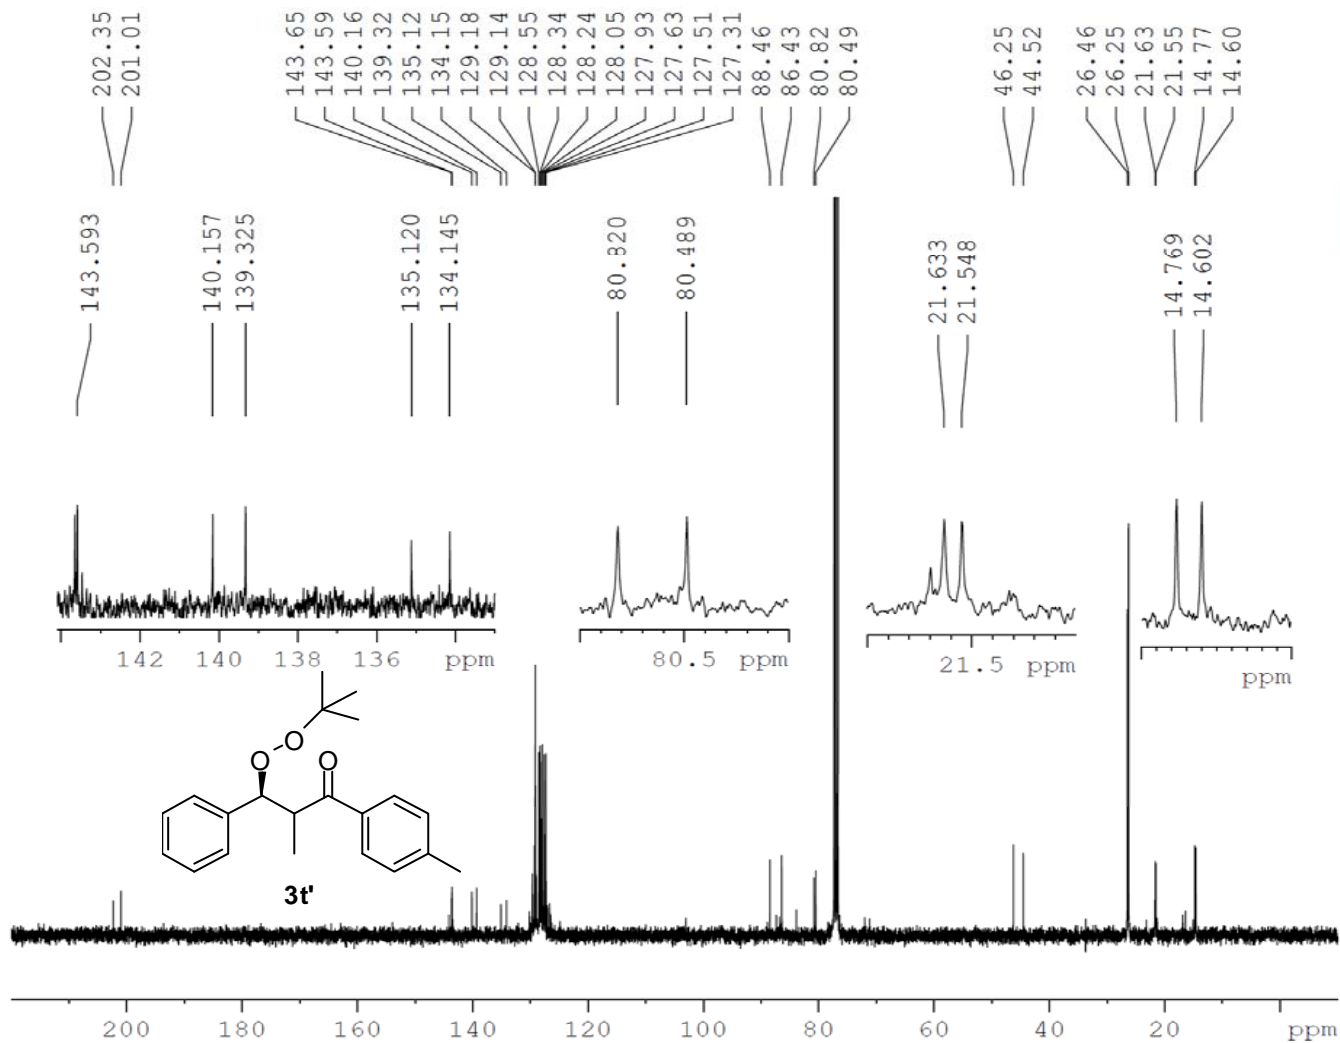

Current Data Parameters  
 NAME 1140-2-3-C-G-9.fid  
 EXPNO 1  
 PROCNO 1

F2 - Acquisition Parameters  
 Date\_ 20141216  
 Time\_ 0.00  
 INSTRUM varian  
 PROBHD  
 PULPROG s2pul  
 TD 65536  
 SOLVENT cdcl3  
 NS 1600  
 DS 0  
 SWH 25000.000 Hz  
 FIDRES 0.381470 Hz  
 AQ 1.3107700 sec  
 RG 4  
 DW 20.000 usec  
 DE 115.71 usec  
 TE 297.0 K

F2 - Processing parameters  
 SI 65536  
 SF 100.5214567 MHz  
 WDW EM  
 SSB 0  
 LB 1.00 Hz  
 GB 0  
 PC 1.00



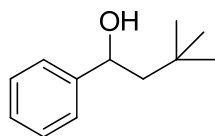

**3u**

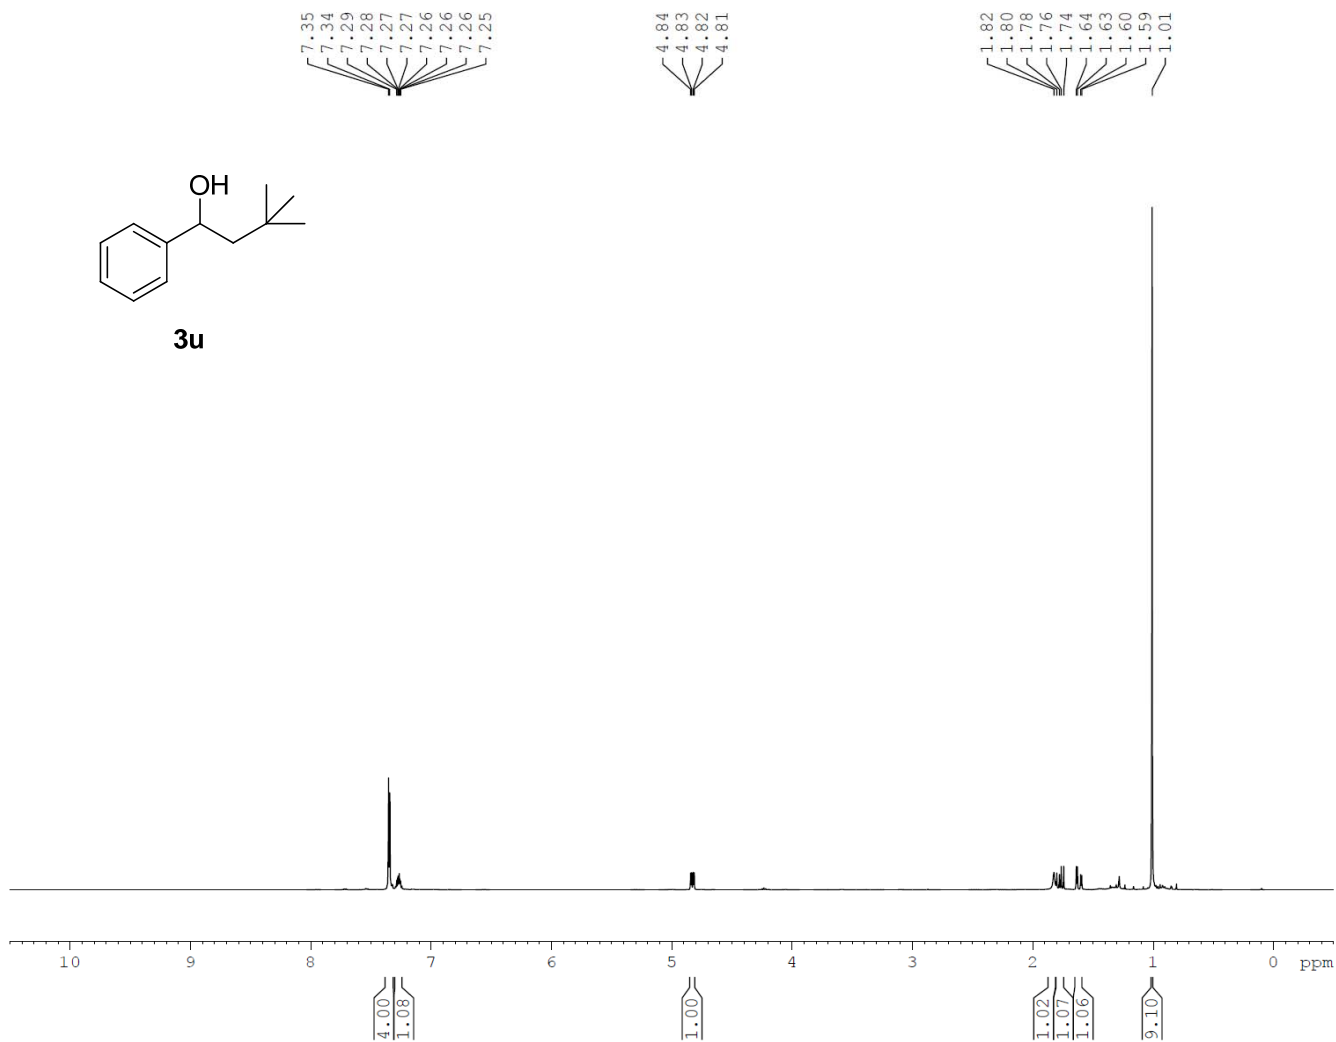

Current Data Parameters  
 NAME 1117-1-H-G.fid  
 EXPNO 1  
 PROCNO 1

F2 - Acquisition Parameters  
 Date\_ 20141002  
 Time\_ 0.00  
 INSTRUM varian  
 PROBHD  
 PULPROG s2pul  
 TD 32768  
 SOLVENT cdcl3  
 NS 40  
 DS 0  
 SWH 6410.256 Hz  
 FIDRES 0.195625 Hz  
 AQ 2.5559540 sec  
 RG 4  
 DW 78.000 usec  
 DE 115.71 usec  
 TE 298.0 K

F2 - Processing parameters  
 SI 32768  
 SF 399.7627610 MHz  
 WDW EM  
 SSB 0  
 LB 0.30 Hz  
 GB 0  
 PC 1.00

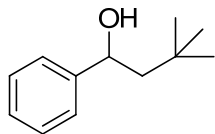

**3u**

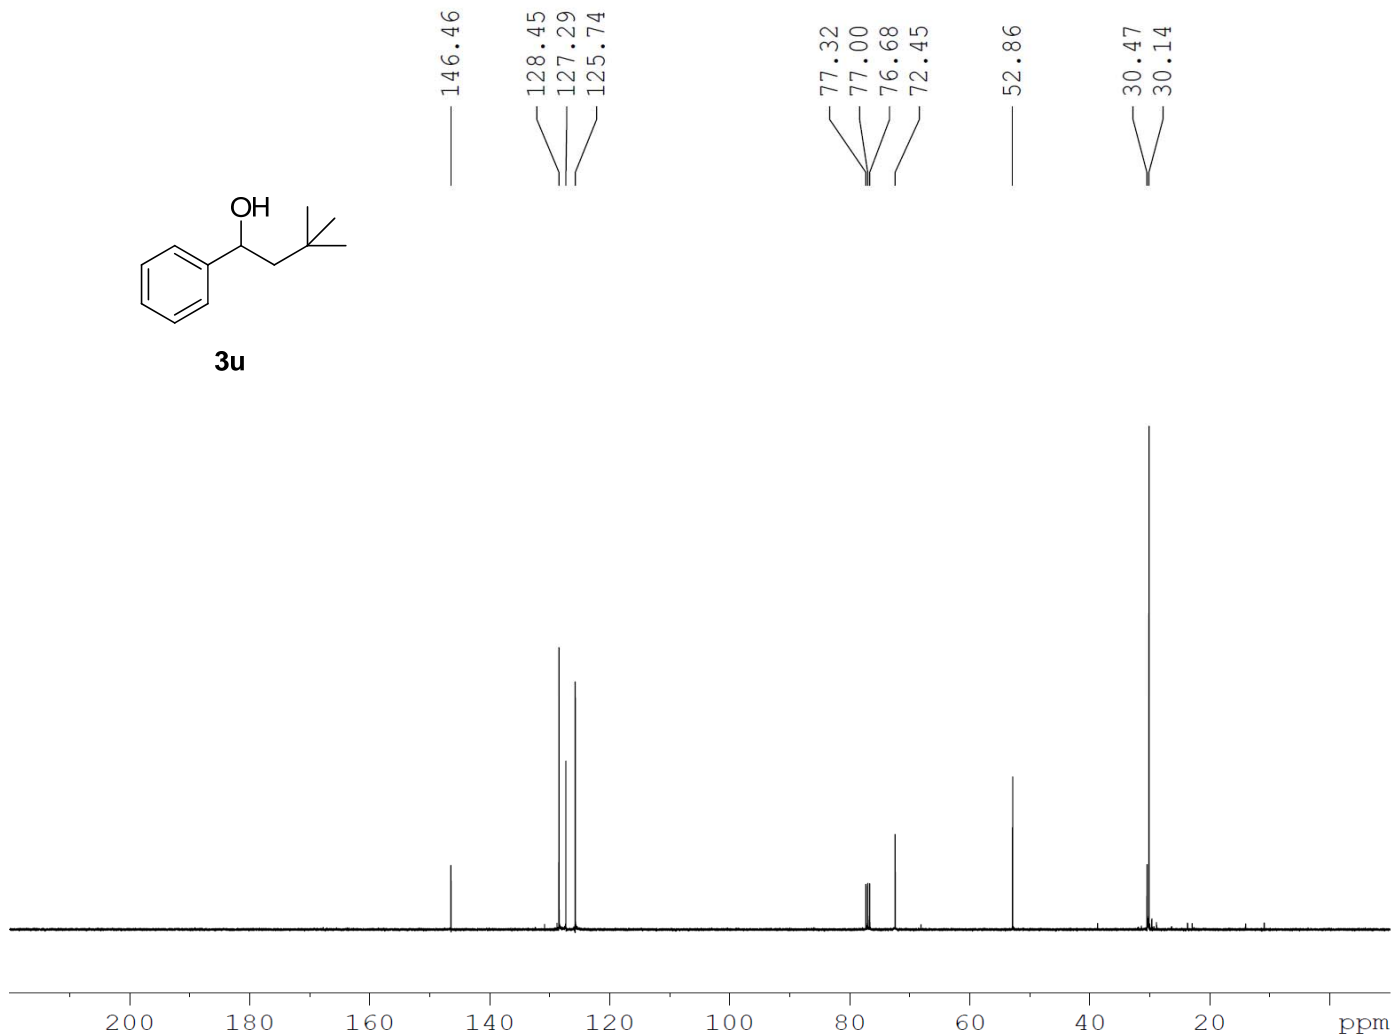

Current Data Parameters  
 NAME 1117-1-C-G-4.fid  
 EXPNO 1  
 PROCNO 1

F2 - Acquisition Parameters  
 Date\_ 20141002  
 Time\_ 0.00  
 INSTRUM varian  
 PROBHD  
 PULPROG s2pul  
 TD 65536  
 SOLVENT cdcl3  
 NS 328  
 DS 0  
 SWH 25510.203 Hz  
 FIDRES 0.389255 Hz  
 AQ 1.3107700 sec  
 RG 4  
 DW 19.600 usec  
 DE 115.71 usec  
 TE 298.0 K

F2 - Processing parameters  
 SI 65536  
 SF 100.5218605 MHz  
 WDW EM  
 SSB 0  
 LB 0.30 Hz  
 GB 0  
 PC 1.00

7.37  
7.36  
7.35  
7.34  
7.33  
7.32  
7.31  
7.30  
7.29  
7.28  
7.27  
7.26  
7.21  
7.19  
7.17  
4.71  
4.70  
4.69  
4.68  
2.80  
2.78  
2.78  
2.76  
2.75  
2.74  
2.73  
2.71  
2.70  
2.69  
2.67  
2.66  
2.66  
2.64  
2.59  
2.58  
2.18  
2.17  
2.17  
2.16  
2.15  
2.15  
2.14  
2.14  
2.13  
2.12  
2.12  
2.11  
2.10  
2.08  
2.07  
2.07  
2.06  
2.05  
2.05  
2.04  
2.04  
2.03  
2.03  
2.03  
2.02  
2.01  
2.01  
2.00  
1.77

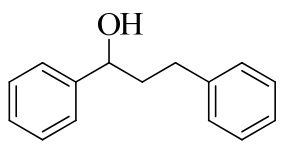

3v

4.714  
4.700  
4.694  
4.681

2.785  
2.775  
2.765  
2.750  
2.740  
2.726  
2.714  
2.698  
2.691  
2.674  
2.663  
2.656  
2.639

2.158  
2.143  
2.138  
2.134  
2.123  
2.119  
2.115  
2.100  
2.084  
2.070  
2.068  
2.059  
2.054  
2.046  
2.043  
2.030

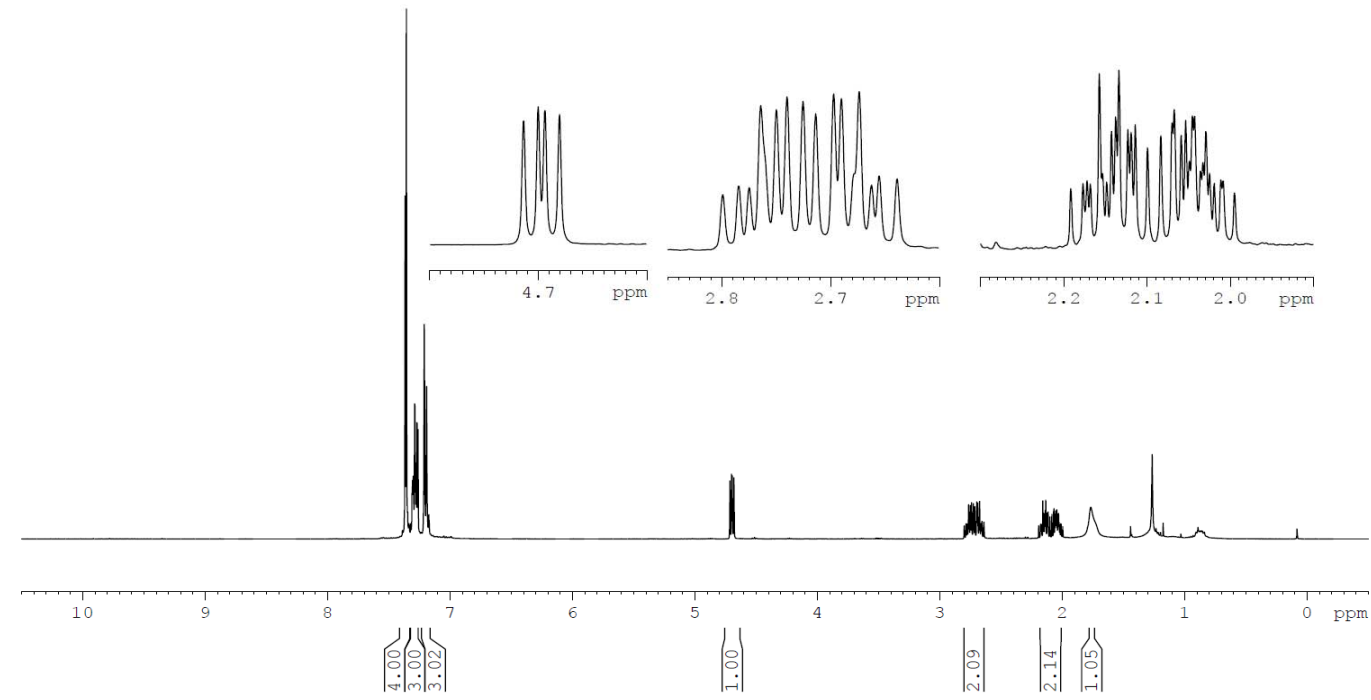

Current Data Parameters  
NAME ra-pen-oh-1.fid  
EXPNO 1  
PROCNO 1

F2 - Acquisition Parameters  
Date 20131004  
Time 0.00  
INSTRUM varian  
PROBHD  
PULPROG s2pul  
TD 32768  
SOLVENT cdcl3  
NS 48  
DS 0  
SWH 6410.256 Hz  
FIDRES 0.195625 Hz  
AQ 2.5559540 sec  
RG 4  
DW 78.000 usec  
DE 115.71 usec  
TE 298.0 K

F2 - Processing parameters  
SI 32768  
SF 399.7627826 MHz  
WDW EM  
SSB 0  
LB 0.30 Hz  
GB 0  
PC 1.00

RA-PEN-OH

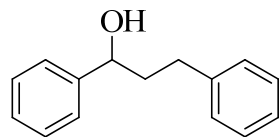

3v

144.53  
141.74  
128.51  
128.42  
128.37  
127.64  
125.90  
125.84

77.32  
77.00  
76.68  
73.87

40.44  
32.04

Current Data Parameters  
NAME RA-PEN-OH-C.fid  
EXPNO 1  
PROCNO 1

F2 - Acquisition Parameters  
Date\_ 20131004  
Time\_ 0.00  
INSTRUM varian  
PROBHD  
PULPROG s2pul  
TD 65536  
SOLVENT cdc13  
NS 948  
DS 0  
SWH 25510.203 Hz  
FIDRES 0.389255 Hz  
AQ 1.3107700 sec  
RG 4  
DW 19.600 usec  
DE 115.71 usec  
TE 298.0 K

F2 - Processing parameters  
SI 65536  
SF 100.5218604 MHz  
WDW EM  
SSB 0  
LB 0.30 Hz  
GB 0  
PC 1.00

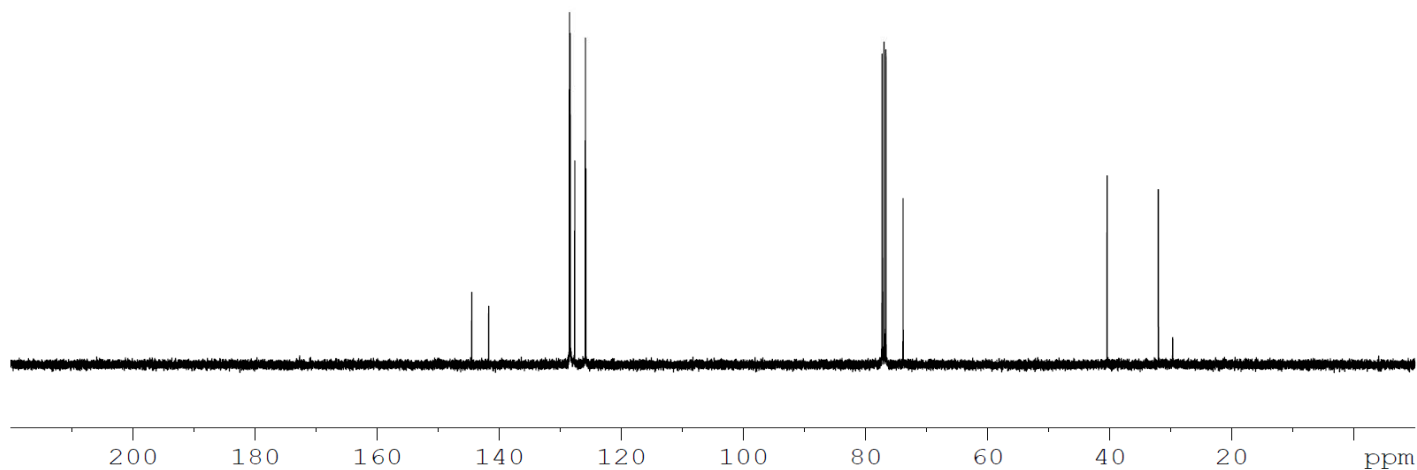

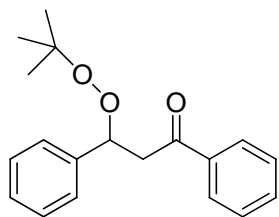

4a

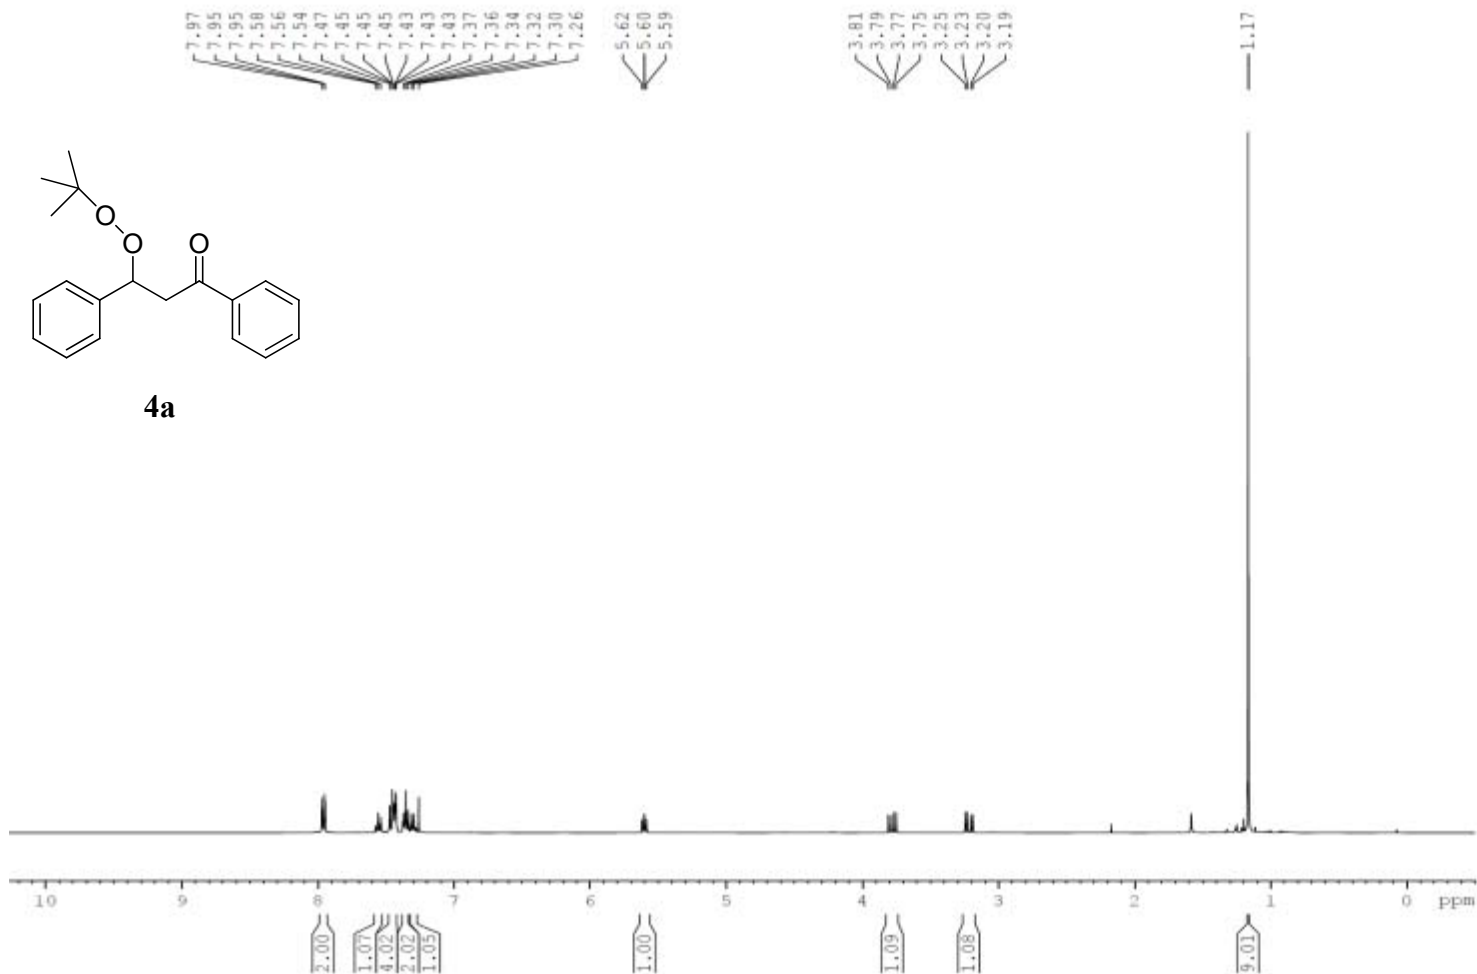

```

Current Data Parameters
NAME      RA-135-OP.fid
EXPNO     1
PROCNO    1

F2 - Acquisition Parameters
Date_     20131222
Time      0.00
INSTRUM   varian
PROBHD
PULPROG   s2pul
TD         32768
SOLVENT   cdcl3
NS         32
DS         0
SWH        6410.256 Hz
FIDRES     0.195625 Hz
AQ         2.5559540 sec
RG         4
DW         78.000 usec
DE         115.71 usec
TE         298.0 K

F2 - Processing parameters
SI         32768
SF         399.7627613 MHz
WDW        EM
SSB        0
LB         0.30 Hz
GB         0
PC         1.00
  
```

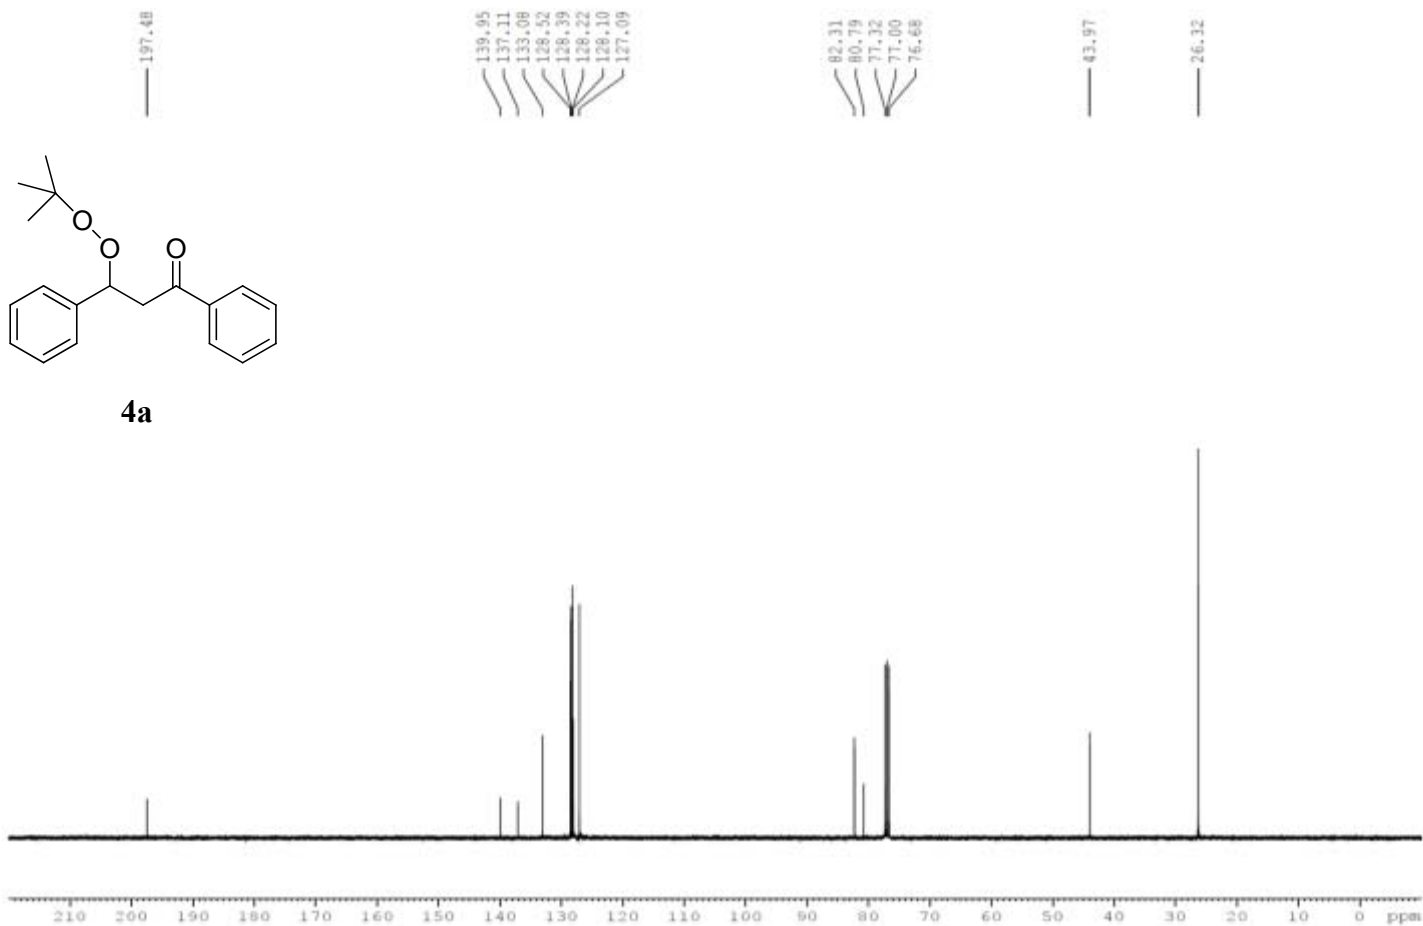

```

Current Data Parameters
NAME      953-1-C-G-1.fid
EXPNO     1
PROCNO    1

F2 - Acquisition Parameters
Date_     20131222
Time      0.00
INSTRUM   varian
PROBHD
PULPROG   s2pu1
TD         65536
SOLVENT   cdcl3
NS         1028
DS         0
SWH        25510.203 Hz
FIDRES     0.389255 Hz
AQ         1.3107700 sec
RG         4
DW         19.600 usec
DE         115.71 usec
TE         298.0 K

F2 - Processing parameters
SI         65536
SF         100.5218586 MHz
WDW        EM
SSB        0
LB         0.30 Hz
GB         0
PC         1.00
  
```

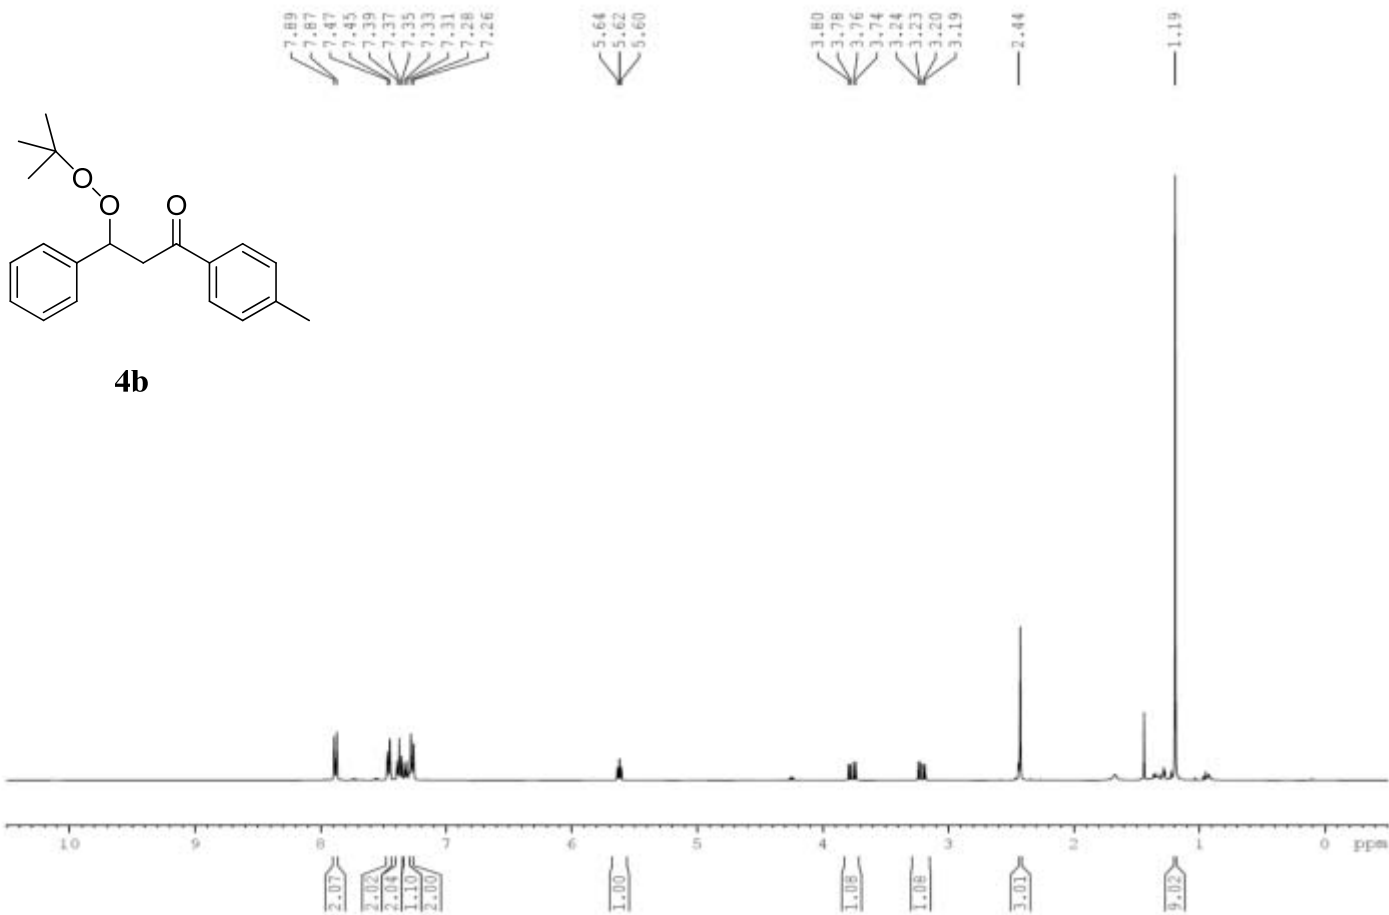

Current Data Parameters  
NAME 961-1-H.fid  
EXPNO 1  
PROCNO 1

F2 - Acquisition Parameters  
Date\_ 20130924  
Time 0.00  
INSTRUM varian  
PROBHD  
PULPROG s2pul  
TD 32768  
SOLVENT cdcl3  
NS 44  
DS 0  
SWH 6410.256 Hz  
FIDRES 0.195625 Hz  
AQ 2.5559540 sec  
RG 4  
DW 78.000 usec  
DE 115.71 usec  
TE 298.0 K

F2 - Processing parameters  
SI 32768  
SF 399.7627679 MHz  
WDW EM  
SSB 0  
LB 0.30 Hz  
GB 0  
PC 1.00

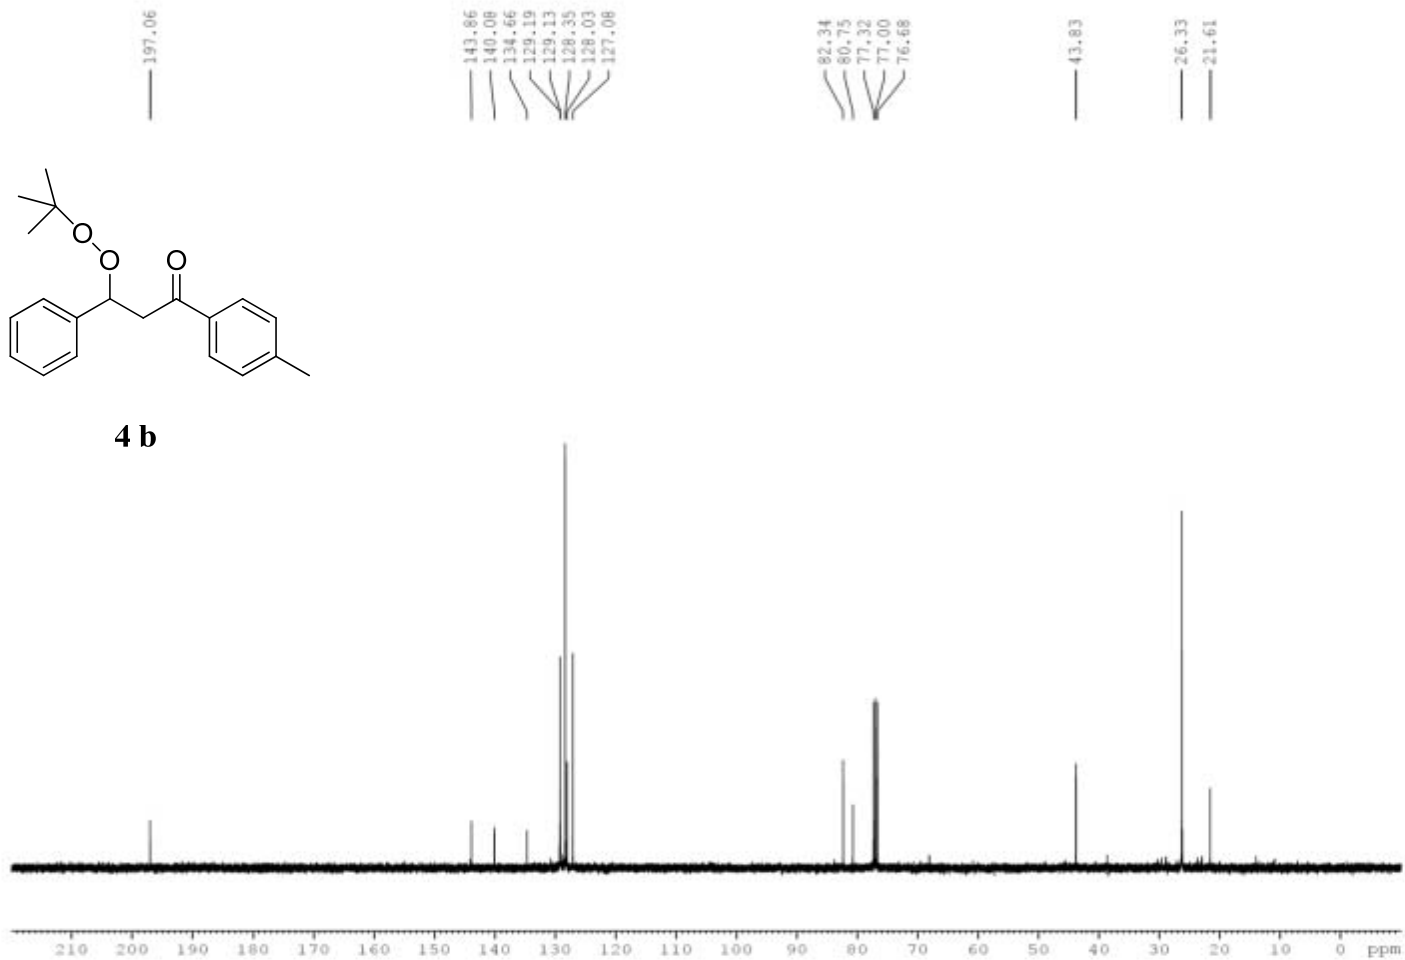

```

Current Data Parameters
NAME          961-1-C.fid
EXPNO         1
PROCNO        1

F2 - Acquisition Parameters
Date_         20130924
Time          0.00
INSTRUM       varian
PROBHD
PULPROG       s2pul
TD            65536
SOLVENT       cdcl3
NS            352
DS            0
SWH           25510.203 Hz
FIDRES        0.389255 Hz
AQ            1.3107700 sec
RG            4
DW            19.600 usec
DE            115.71 usec
TE            298.0 K

F2 - Processing parameters
SI            65536
SF            100.5218652 MHz
WDW           EM
SSB           0
ISB           0.30 Hz
GB            0
PC            1.00

```



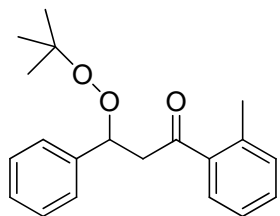

4c

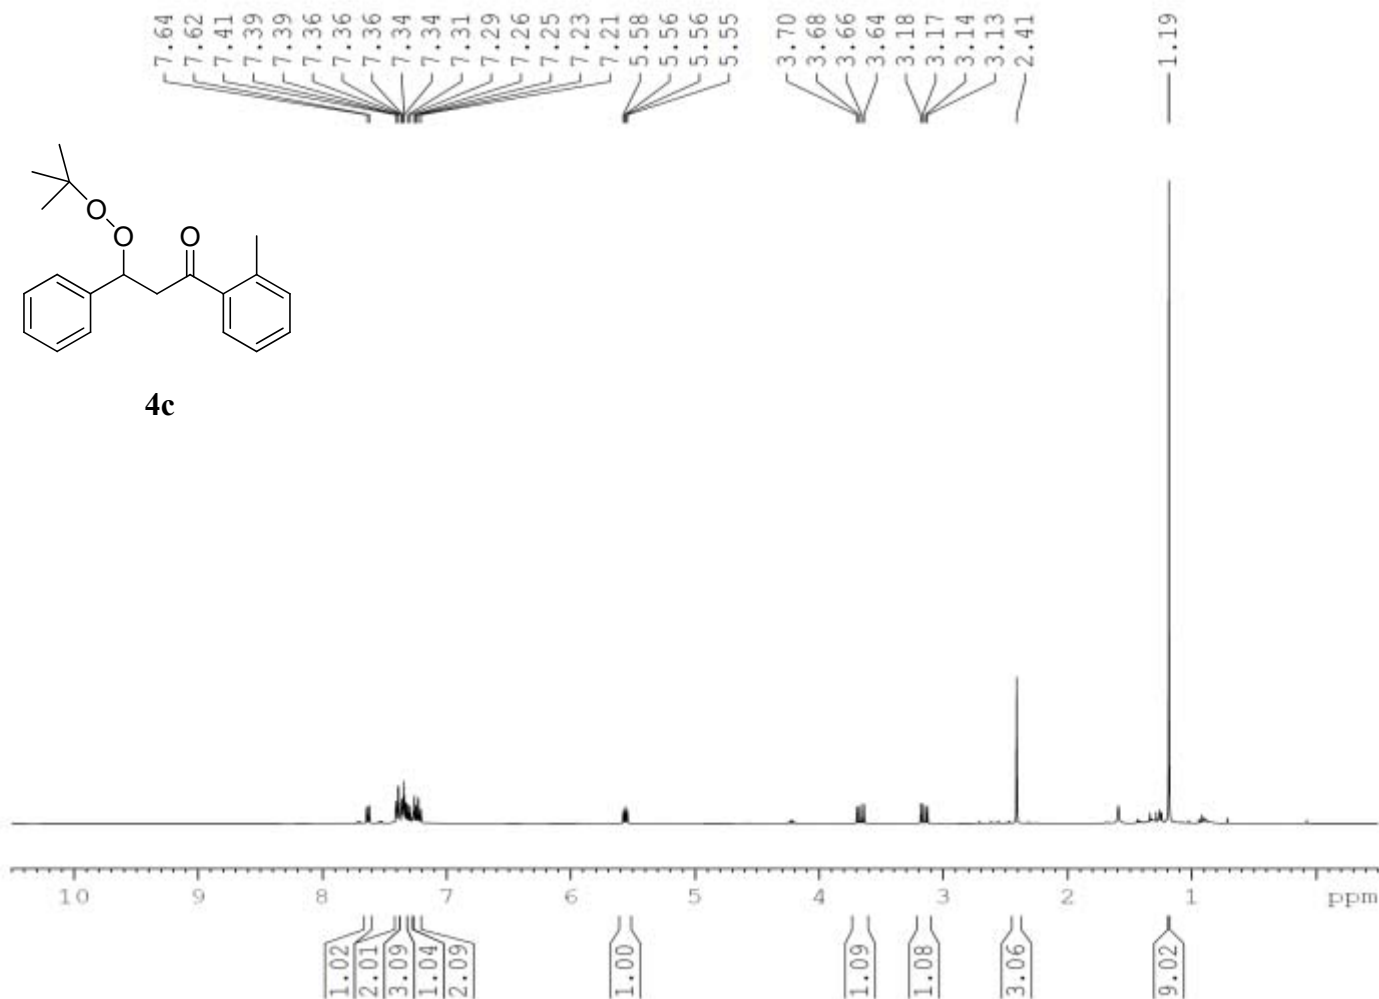

```

Current Data Parameters
NAME      971-2-1-H-G.fid
EXPNO    1
PROCNO   1

F2 - Acquisition Parameters
Date_    20131025
Time     0.00
INSTRUM  varian
PROBHD
PULPROG  s2pul1
TD       32768
SOLVENT  cdc13
NS       32
DS       0
SWH      6410.256 Hz
FIDRES   0.195625 Hz
AQ       2.5559540 sec
RG       4
DW       78.000 usec
DE       115.71 usec
TE       298.0 K

F2 - Processing parameters
SI       32768
SF       399.7627607 MHz
WDW      EM
SSB      0
LB       0.30 Hz
GB       0
PC       1.00
  
```

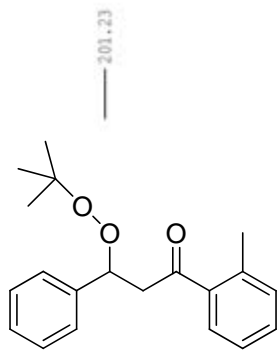

**4c**

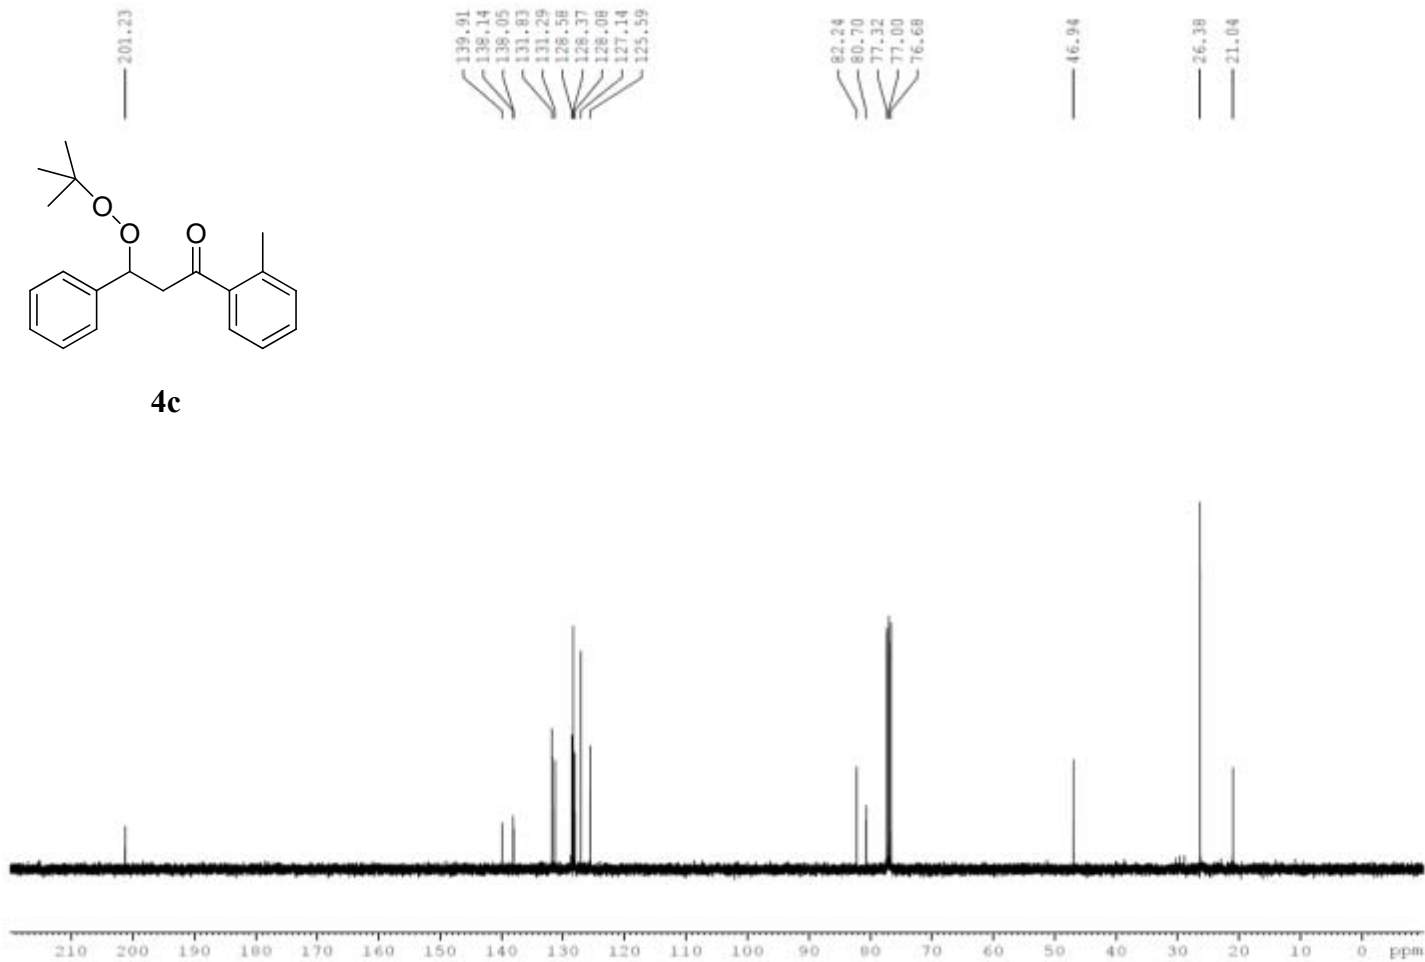

Current Data Parameters  
 NAME 971-2-1-C-G.fid  
 EXPNO 1  
 PROCNO 1

F2 - Acquisition Parameters  
 Date\_ 20131025  
 Time\_ 0.00  
 INSTRUM varian  
 PROBHD  
 PULPROG zgpg30  
 TD 65536  
 SOLVENT cdcl3  
 NS 240  
 DS 0  
 SWH 25510.203 Hz  
 FIDRES 0.389255 Hz  
 AQ 1.3107700 sec  
 RG 4  
 DW 19.600 usec  
 DE 115.71 usec  
 TE 298.0 K

F2 - Processing parameters  
 SI 65536  
 SF 100.5218574 MHz  
 WDW EM  
 SSB 0  
 LB 0.30 Hz  
 GB 0  
 PC 1.00

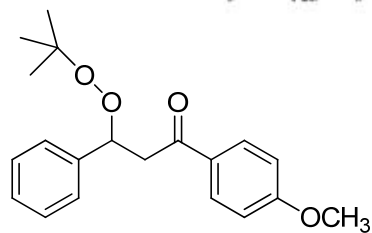

4d

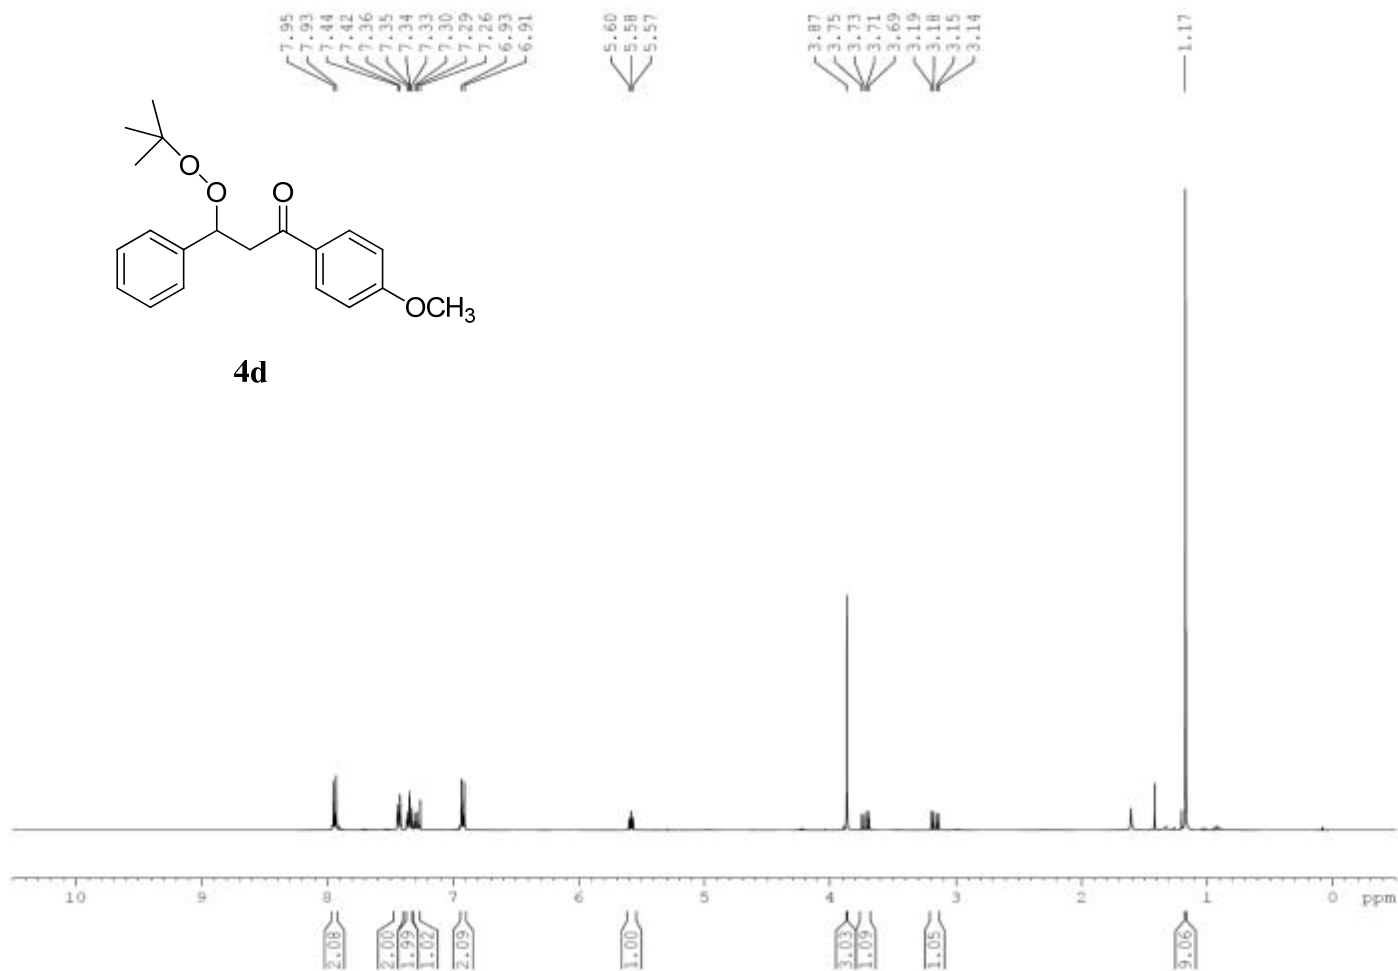

Current Data Parameters  
 NAME 966-1-1-1-H.fid  
 EXPNO 1  
 PROCNO 1

F2 - Acquisition Parameters  
 Date\_ 20131003  
 Time\_ 0.00  
 INSTRUM varian  
 PROBHD  
 PULPROG s2pul  
 TD 32768  
 SOLVENT cdcl3  
 NS 32  
 DS 0  
 SWH 6402.049 Hz  
 FIDRES 0.195375 Hz  
 AQ 2.5559540 sec  
 RG 4  
 DW 78.100 usec  
 DE 115.71 usec  
 TE 298.0 K

F2 - Processing parameters  
 SI 32768  
 SF 399.7627669 MHz  
 WDW EM  
 SSB 0  
 LB 0.30 Hz  
 GB 0  
 PC 1.00

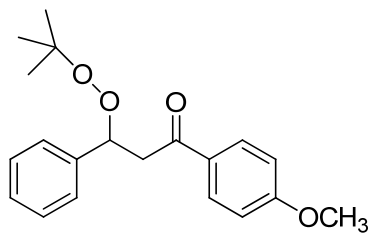

4d

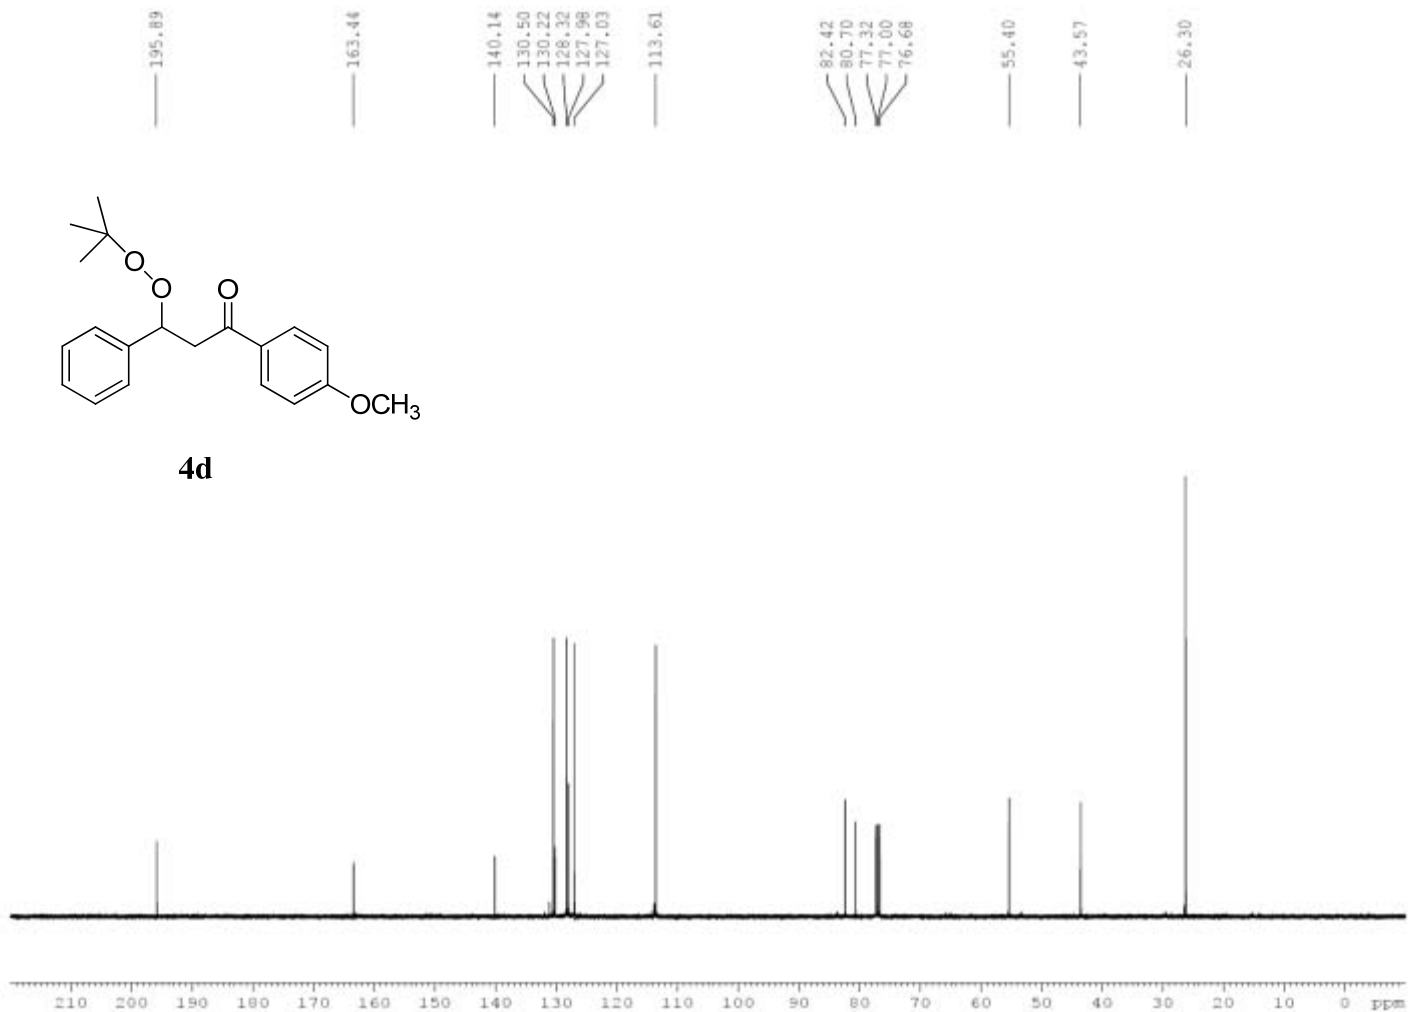

Current Data Parameters  
 NAME RA-202-OP-C-3.fid  
 EXPNO 1  
 PROCNO 1

F2 - Acquisition Parameters  
 Date\_ 20140107  
 Time\_ 0.00  
 INSTRUM varian  
 PROBHD  
 PULPROG s2pul  
 TD 65536  
 SOLVENT cdcl3  
 NS 212  
 DS 0  
 SWH 25510.203 Hz  
 FIDRES 0.388255 Hz  
 AQ 1.3107700 sec  
 RG 4  
 DW 19.600 usec  
 DE 115.71 usec  
 TE 298.0 K

F2 - Processing parameters  
 SI 65536  
 SF 100.5218621 MHz  
 WDW EM  
 SSB 0  
 LB 0.30 Hz  
 GB 0  
 PC 1.00

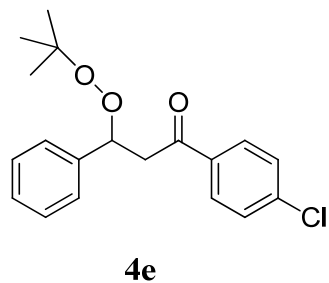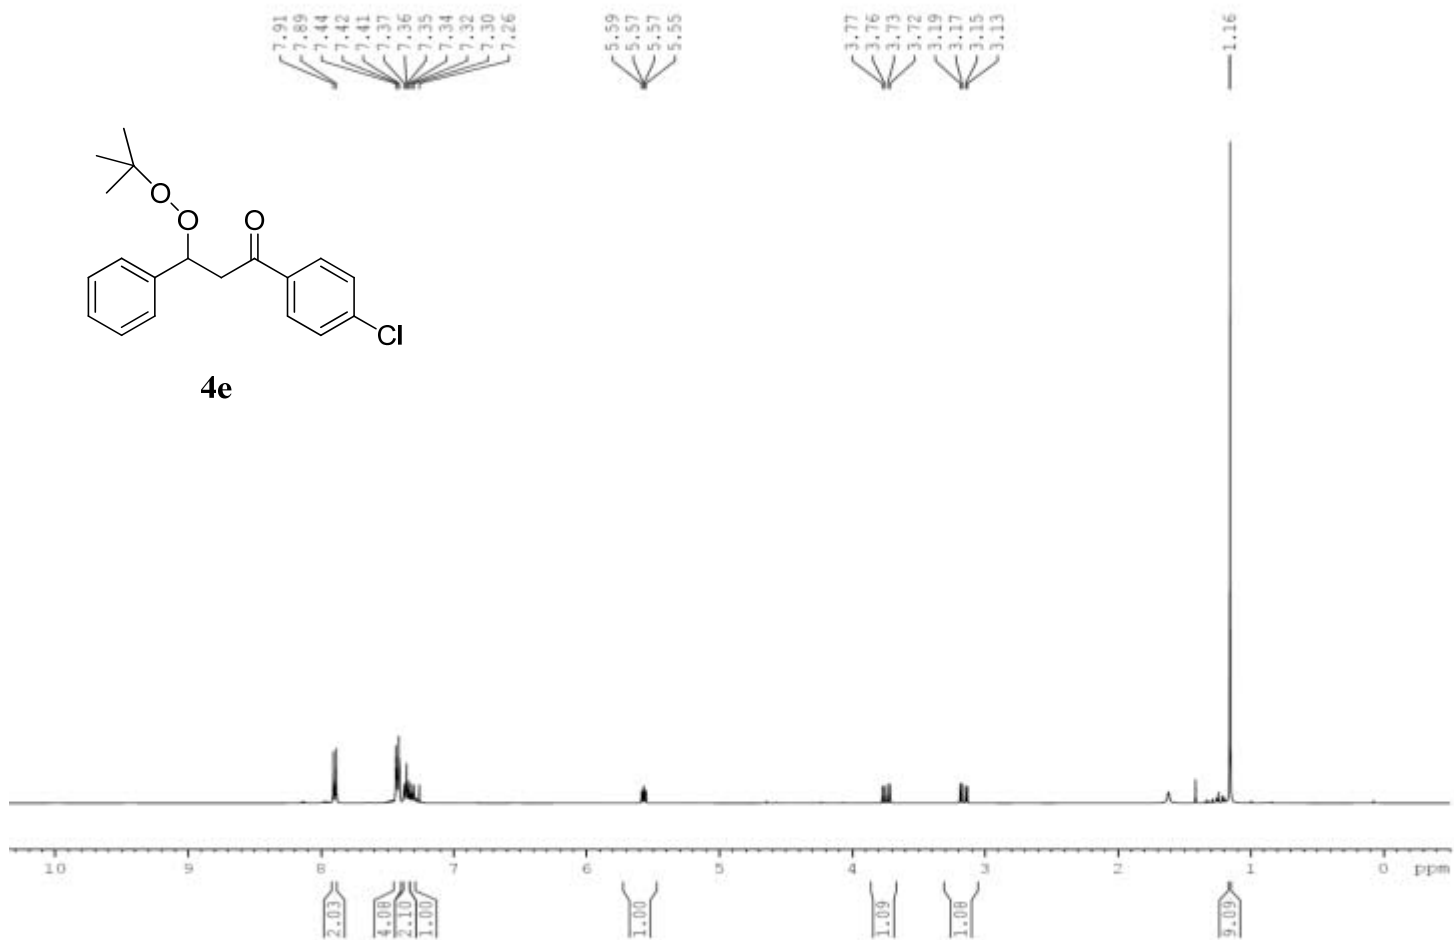

Current Data Parameters  
 NAME 974-2-2-R.fid  
 EXPNO 1  
 PROCNO 1

F2 - Acquisition Parameters  
 Date\_ 20131014  
 Time\_ 0.00  
 INSTRUM Varian  
 PROBRD  
 FULPROG s2pul  
 TD 32768  
 SOLVENT cdcl3  
 NS 32  
 DS 0  
 SWH 6410.256 Hz  
 FIDRES 0.195625 Hz  
 AQ 2.5559540 sec  
 RG 4  
 DW 78.000 usec  
 DE 115.71 usec  
 TE 298.0 K

F2 - Processing parameters  
 SI 32768  
 SF 399.7627604 MHz  
 WDW EM  
 SSB 0  
 LB 0.30 Hz  
 GB 0  
 PC 1.00

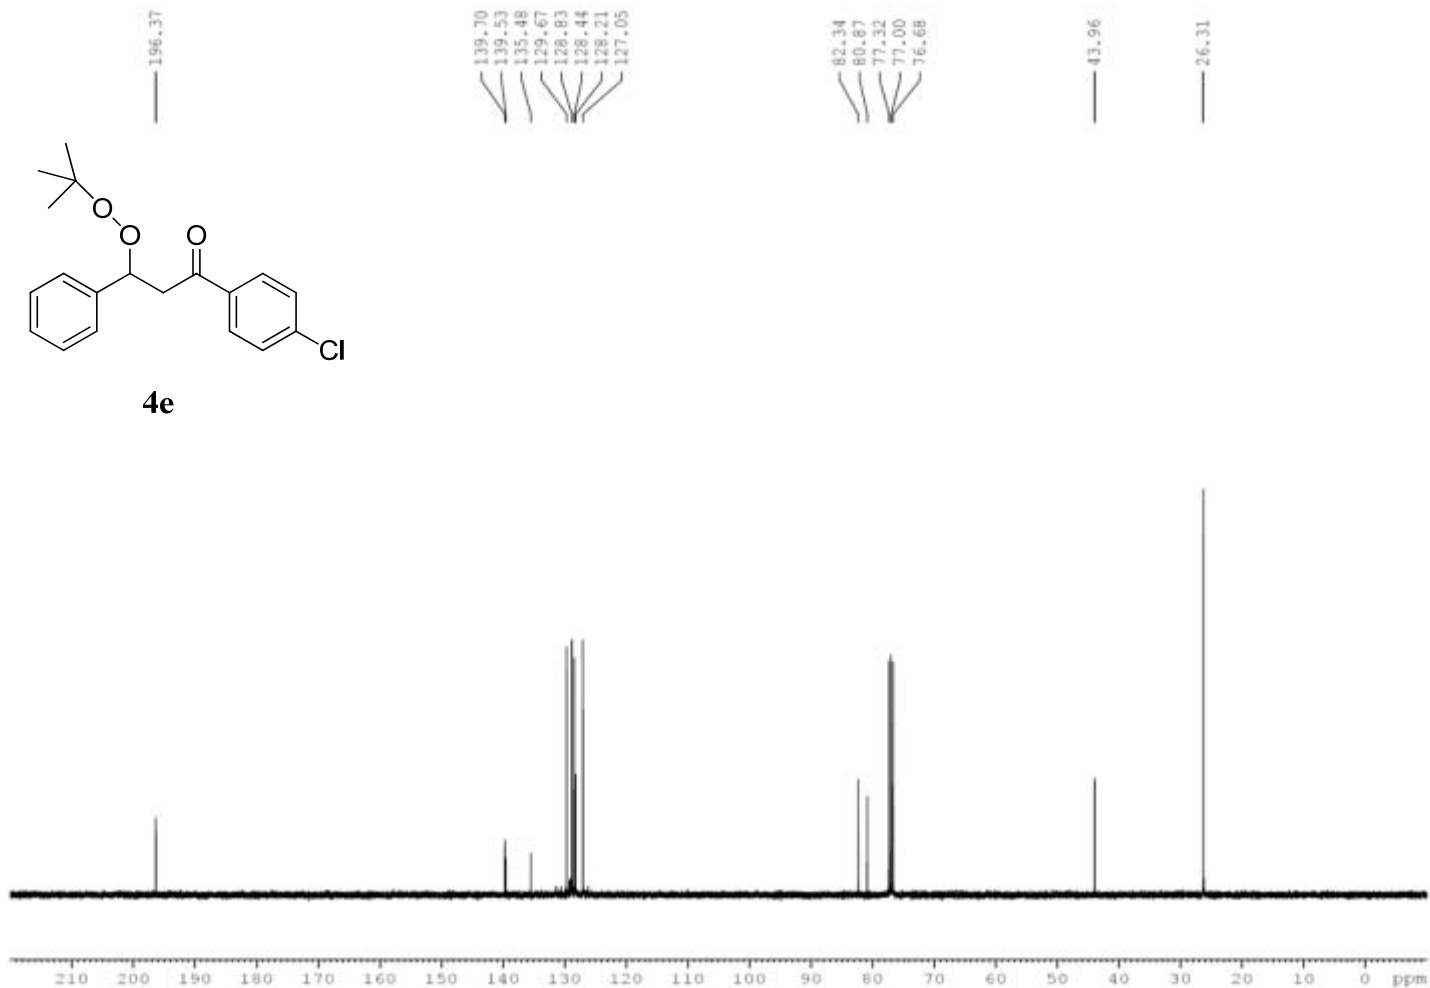

```

Current Data Parameters
NAME      974-2-2-C-1.fid
EXPNO     1
PROCNO    1

F2 - Acquisition Parameters
Date_     20131014
Time      0.00
INSTRUM   varian
PROBHD
PULPROG   s2pul
TD         65536
SOLVENT   cdcl3
NS         840
DS         0
SWH        25510.203 Hz
FIDRES     0.389255 Hz
AQ         1.3107700 sec
RG         4
DW         19.600 usec
DE         115.71 usec
TE         298.0 K

F2 - Processing parameters
SI         65536
SF         100.5218574 MHz
WDW        EM
SSB        0
LB         0.30 Hz
GB         0
PC         1.00

```

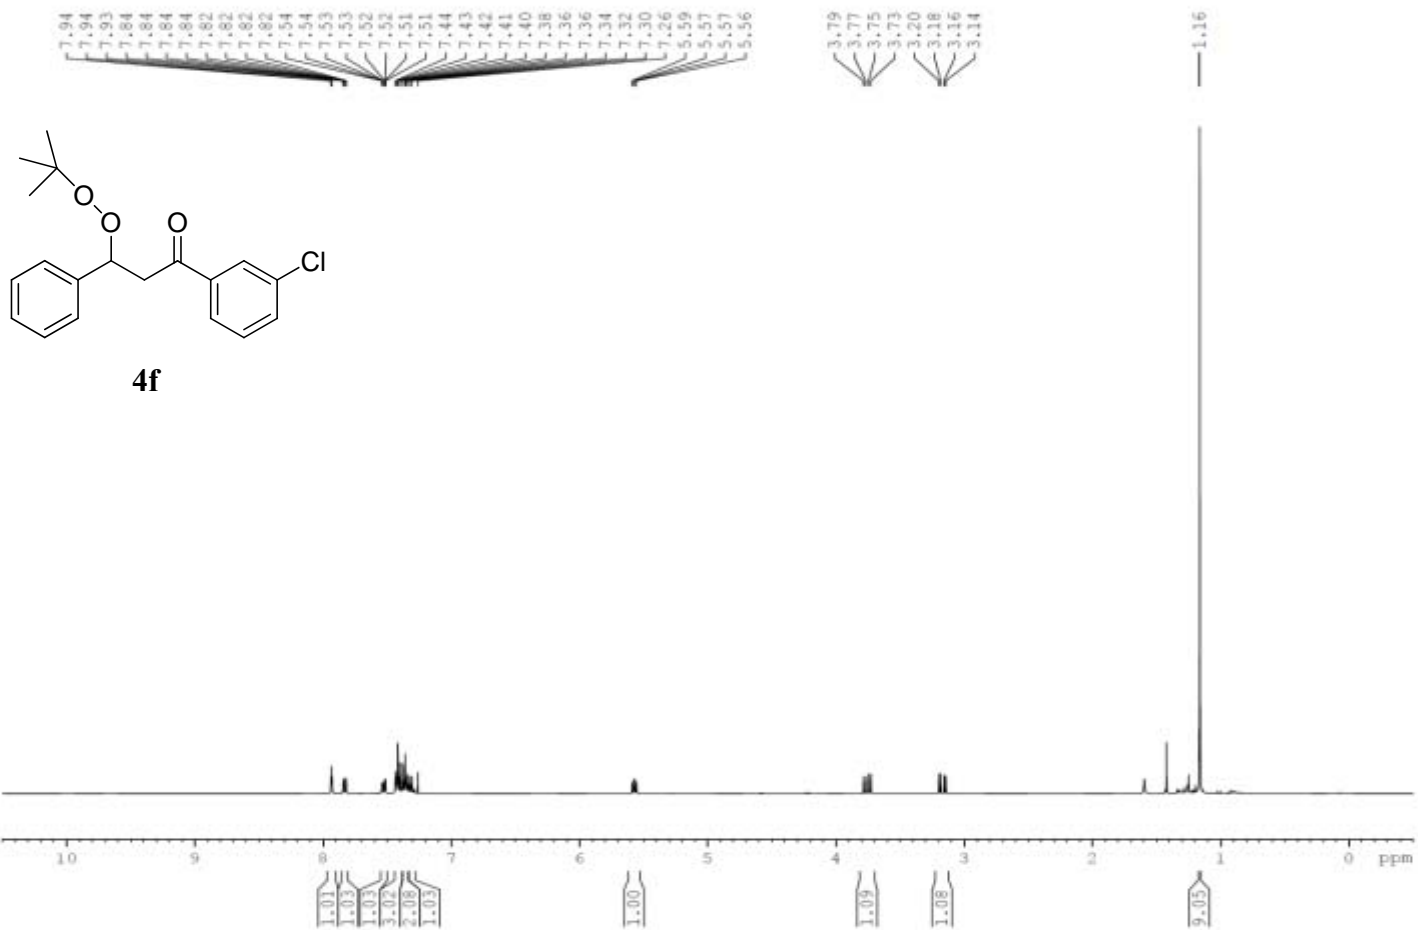

Current Data Parameters  
 NAME 975-2-R-G.fid  
 EXPNO 1  
 PROCNO 1

F2 - Acquisition Parameters  
 Date\_ 20131026  
 Time\_ 0.00  
 INSTRUM varian  
 PROBHD  
 PULPROG s2pul  
 TD 32768  
 SOLVENT cdcl3  
 NS 32  
 DS 0  
 SWH 6410.256 Hz  
 FIDRES 0.195625 Hz  
 AQ 2.5559540 sec  
 RG 4  
 DW 78.000 usec  
 DE 115.71 usec  
 TE 298.0 K

F2 - Processing parameters  
 SI 32768  
 SF 399.7627607 MHz  
 WDW EM  
 SSB 0  
 LB 0.30 Hz  
 GB 0  
 PC 1.00

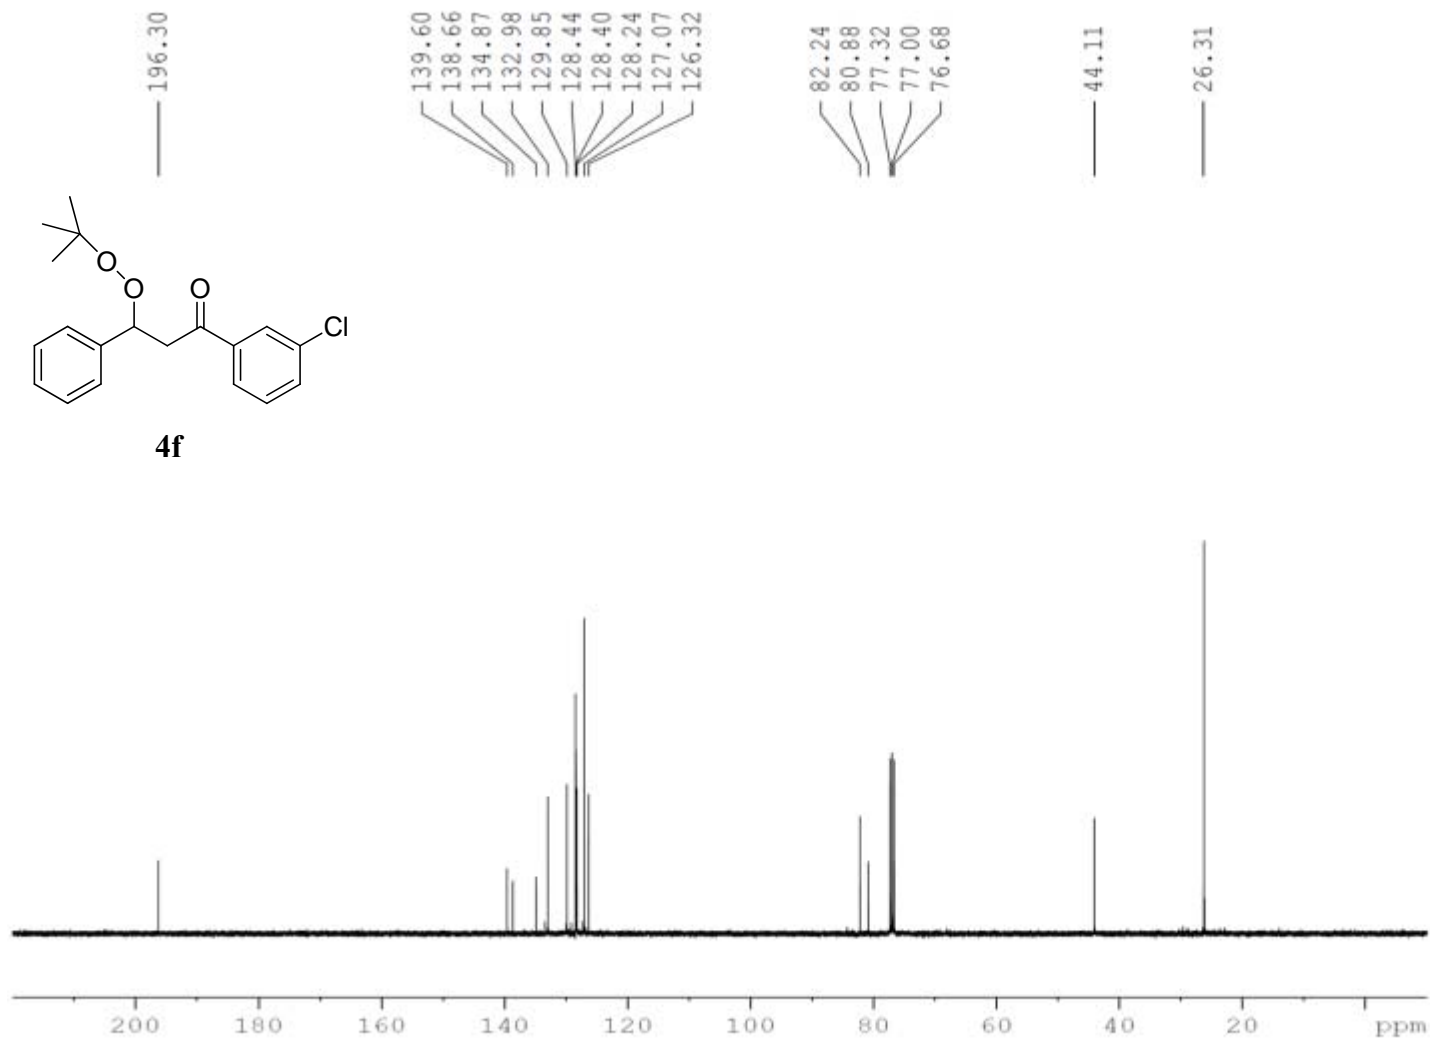

Current Data Parameters  
 NAME 975-2-C-G-1.fid  
 EXPNO 1  
 PROCNO 1

F2 - Acquisition Parameters  
 Date 20131026  
 Time 0.00  
 INSTRUM varian  
 PROBHD  
 PULPROG s2pul  
 TD 65536  
 SOLVENT cdcl3  
 NS 768  
 DS 0  
 SWH 25510.203 Hz  
 FIDRES 0.389255 Hz  
 AQ 1.3107700 sec  
 RG 4  
 DW 19.600 usec  
 DE 115.71 usec  
 TE 298.0 K

F2 - Processing parameters  
 SI 65536  
 SF 100.5218579 MHz  
 WDW EM  
 SSB 0  
 LB 0.30 Hz  
 GB 0  
 PC 1.00



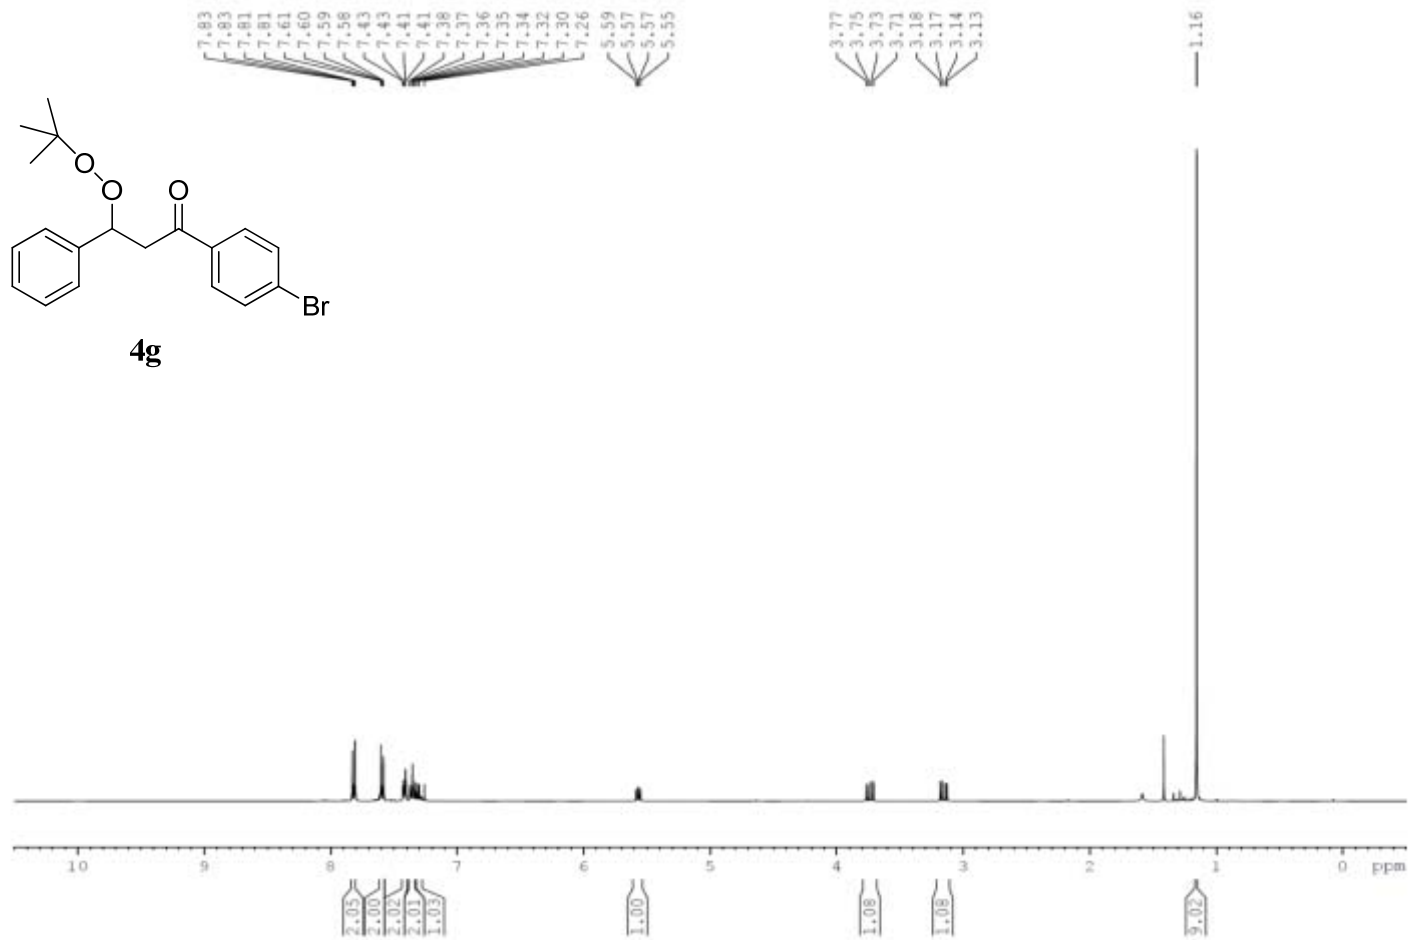

Current Data Parameters  
 NAME 976-2-2-1-H-G.fid  
 EXPNO 1  
 PROCNO 1

F2 - Acquisition Parameters  
 Date\_ 20131025  
 Time\_ 0.00  
 INSTRUM varian  
 PROBHD  
 PULPROG e2pul  
 TD 32768  
 SOLVENT cdcl3  
 NS 32  
 DS 0  
 SWH 6410.256 Hz  
 FIDRES 0.195625 Hz  
 AQ 2.5559540 sec  
 RG 4  
 DW 78.000 usec  
 DE 115.71 usec  
 TE 298.0 K

F2 - Processing parameters  
 SI 32768  
 SF 399.7627605 MHz  
 WDW EM  
 SSB 0  
 LB 0.30 Hz  
 GB 0  
 PC 1.00

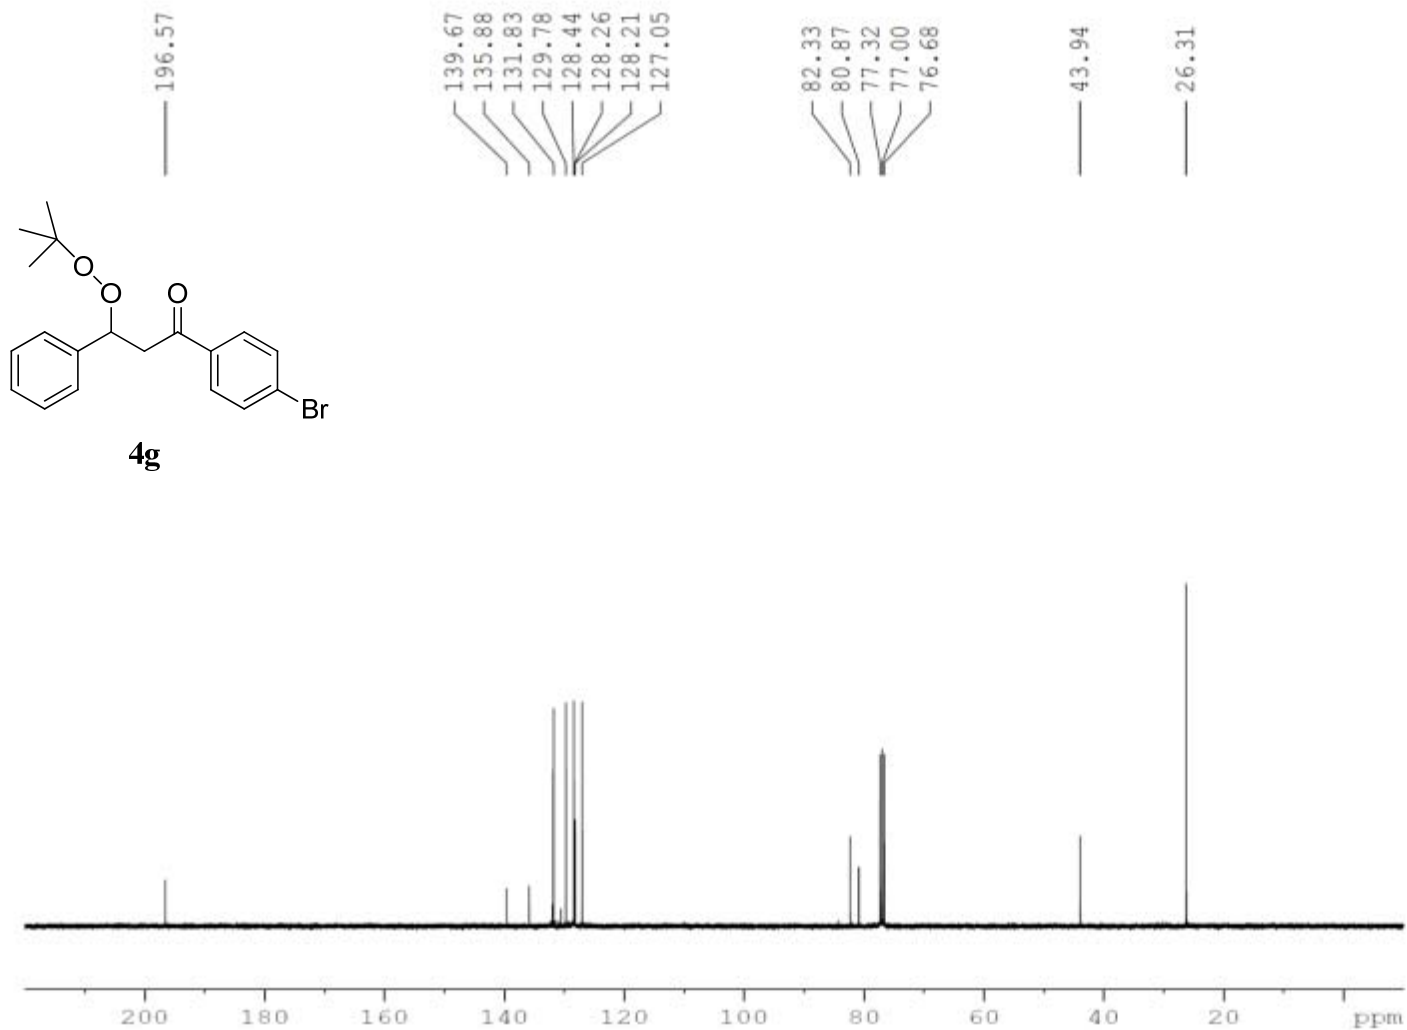

Current Data Parameters  
 NAME 976-2-2-H-G-2.fid  
 EXPNO 1  
 PROCNO 1

F2 - Acquisition Parameters  
 Date\_ 20131025  
 Time\_ 0.00  
 INSTRUM varian  
 PROBHD  
 PULPROG s2pul  
 TD 65536  
 SOLVENT cdc13  
 NS 720  
 DS 0  
 SWH 25510.203 Hz  
 FIDRES 0.389255 Hz  
 AQ 1.3107700 sec  
 RG 4  
 DW 19.600 usec  
 DE 115.71 usec  
 TE 298.0 K

F2 - Processing parameters  
 SI 65536  
 SF 100.5218578 MHz  
 WDW EM  
 SSB 0  
 LB 0.30 Hz  
 GB 0  
 PC 1.00

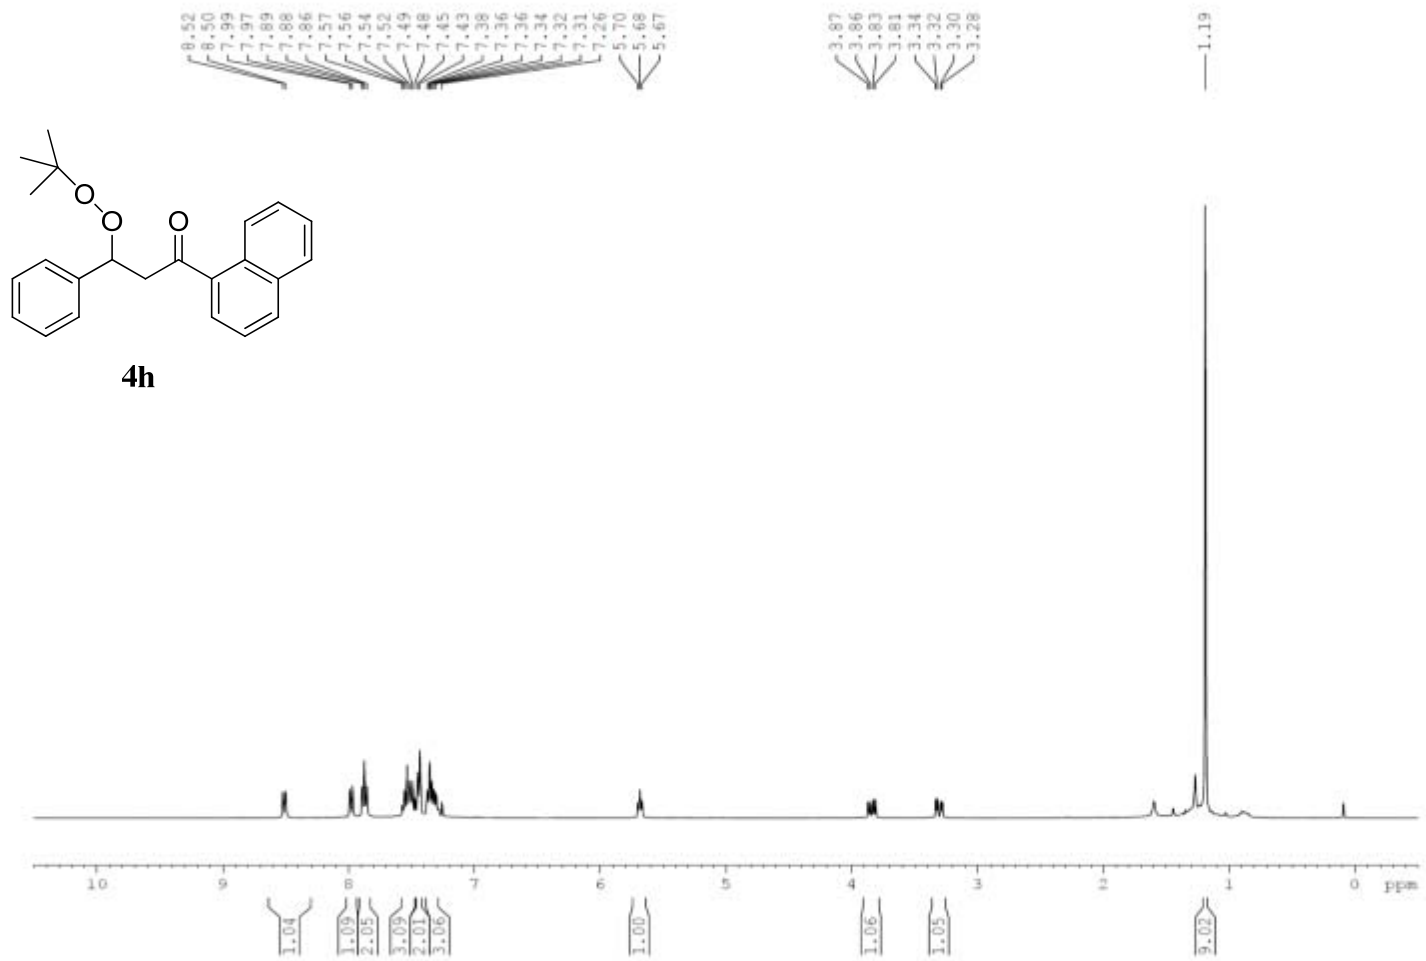

Current Data Parameters  
 NAME RA-205-OP.fid  
 EXPNO 1  
 PROCNO 1

F2 - Acquisition Parameters  
 Date\_ 20140108  
 Time\_ 0.00  
 INSTRUM Varian  
 PROBHD  
 PULPROG s2pul  
 TD 32768  
 SOLVENT cdcl3  
 NS 8  
 DS 0  
 SWH 6402.049 Hz  
 FIDRES 0.195375 Hz  
 AQ 2.5559540 sec  
 RG 4  
 DW 78.100 usec  
 DE 115.71 usec  
 TE 298.0 K

F2 - Processing parameters  
 SI 32768  
 SF 399.7627618 MHz  
 WDW EM  
 SSB 0  
 LB 0.30 Hz  
 GB 0  
 PC 1.00

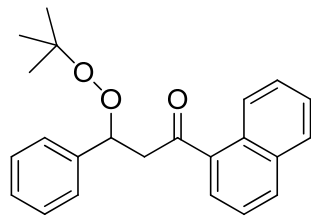

4h

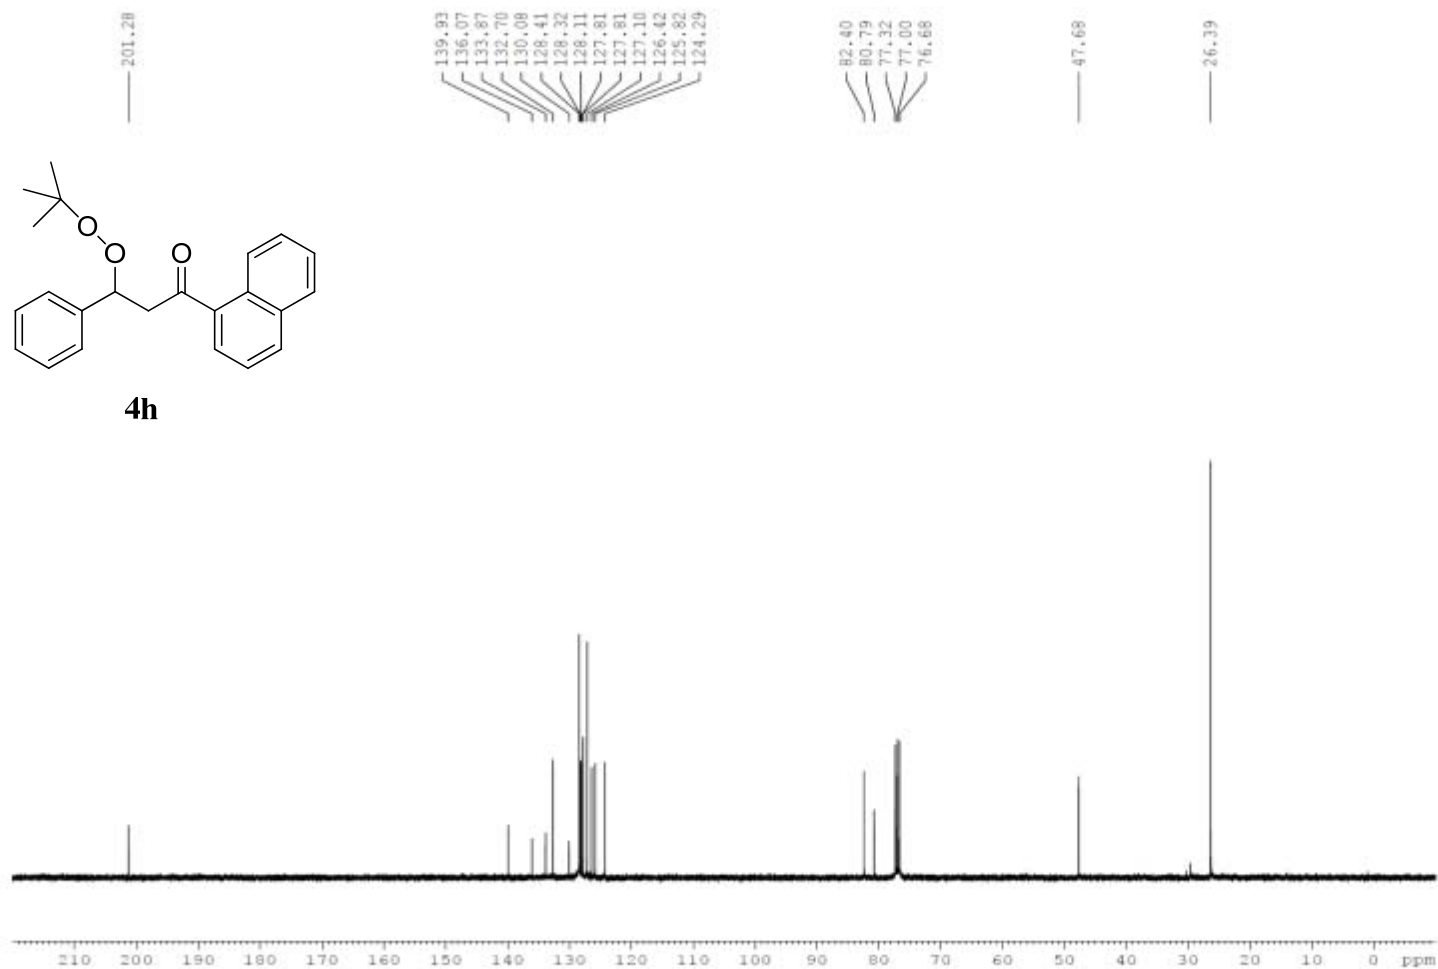

```

Current Data Parameters
NAME      RA-205-OP-C-4.fid
EXPNO     1
PROCNO    1

F2 - Acquisition Parameters
Date_     20140108
Time      0.00
INSTRUM   varian
PROBHD
PULPROG   s2pul
TD         65536
SOLVENT   cdcl3
NS         832
DS         0
SWH        25510.203 Hz
FIDRES     0.389255 Hz
AQ         1.3107700 sec
RG         4
LW         19.600 usec
DE         115.71 usec
TE         298.0 K

F2 - Processing parameters
SI         65536
SF         100.5218590 MHz
WDW        EM
SSB        0
LA         0.30 Hz
GB         0
PC         1.00
  
```

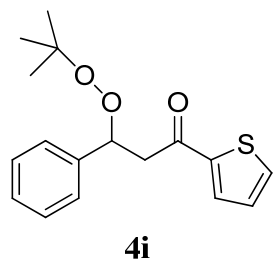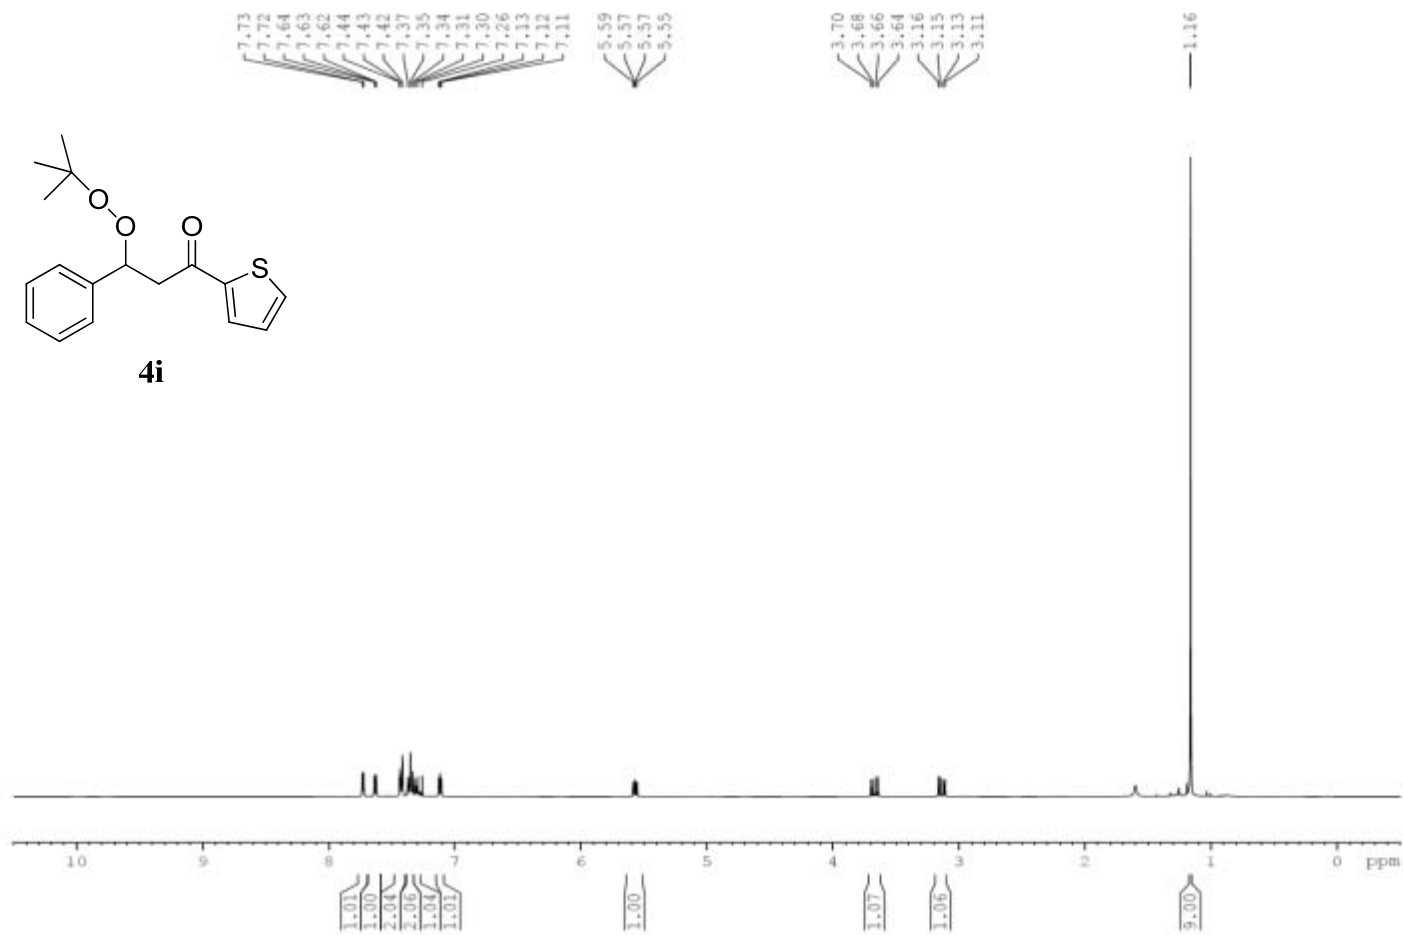

Current Data Parameters  
 NAME 979-2-1-H.fid  
 EXPNO 1  
 PROCNO 1

F2 - Acquisition Parameters  
 Date\_ 20131024  
 Time\_ 0.00  
 INSTRUM varian  
 PROBHD  
 PULPROG s2pul  
 TD 32768  
 SOLVENT cdcl3  
 NS 32  
 DS 0  
 SWH 6410.256 Hz  
 FIDRES 0.195625 Hz  
 AQ 2.5559540 sec  
 RG 4  
 DW 78.000 usec  
 DE 115.71 usec  
 TE 298.0 K

F2 - Processing parameters  
 SI 32768  
 SF 399.7627608 MHz  
 WDW EM  
 SSB 0  
 LB 0.30 Hz  
 GB 0  
 PC 1.00

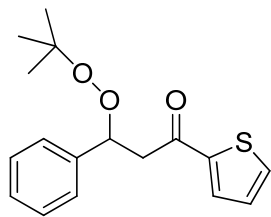

4i

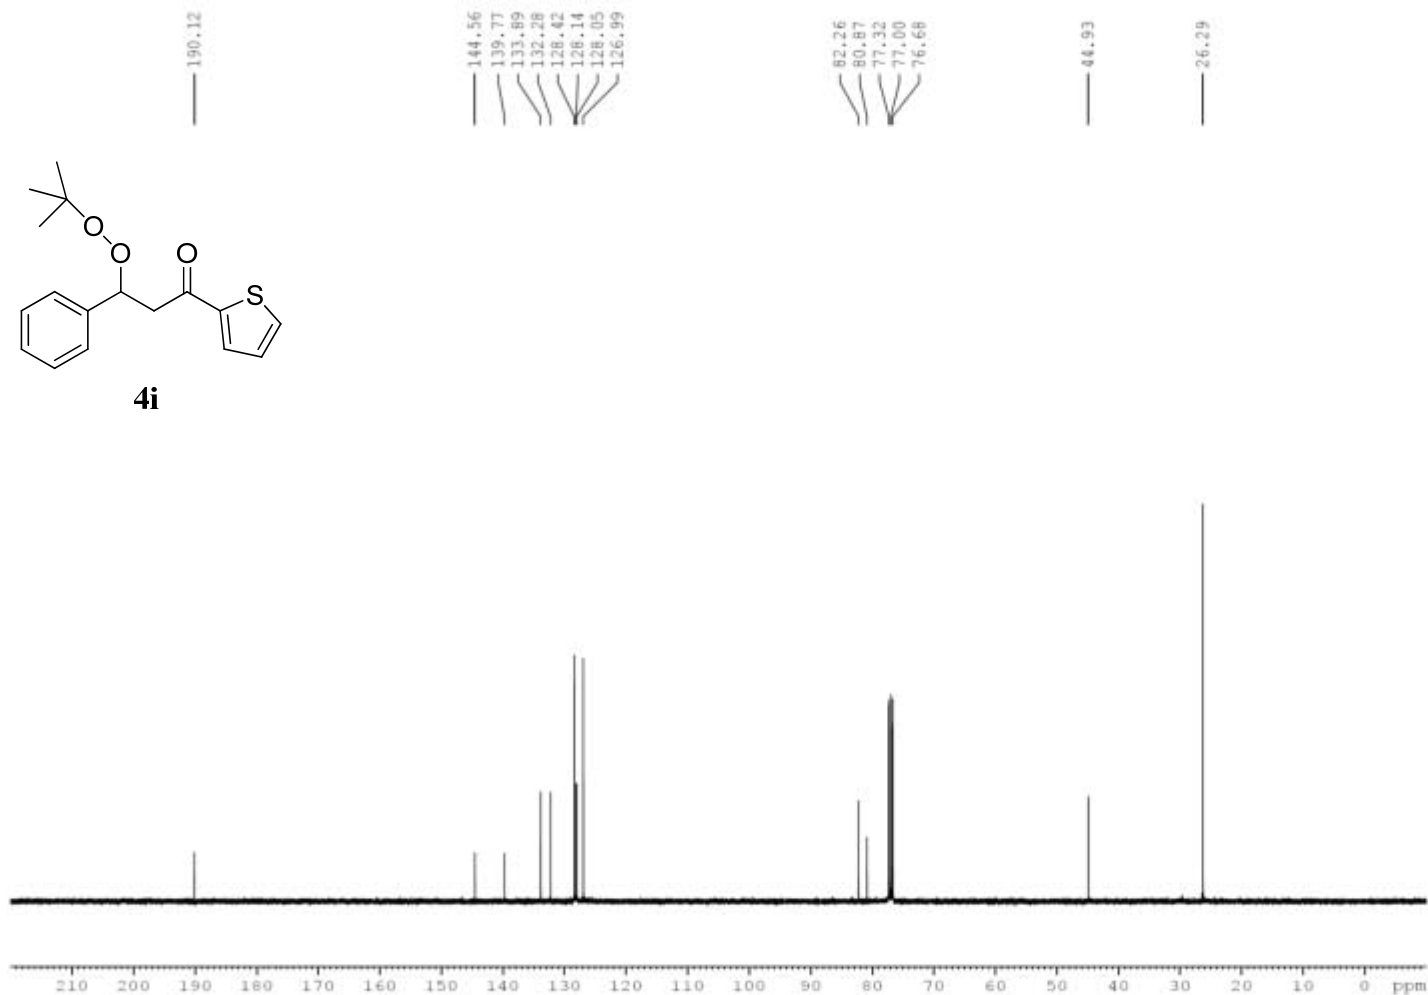

```

Current Data Parameters
NAME      979-2-1-C-G.fid
EXPNO    1
PROCNO   1

F2 - Acquisition Parameters
Date_    20131024
Time     0.00
INSTRUM  varian
PROBHD   s2pul
PULPROG  zgpg30
TD       65536
SOLVENT  cdcl3
NS       880
DS       0
SWH      25510.203 Hz
FIDRES   0.389255 Hz
AQ       1.3107700 sec
RG       4
LW       19.600 usec
DE       115.71 usec
TE       298.0 K

F2 - Processing parameters
SI       65536
SF       100.5218578 MHz
WDW      EM
SSB      0
LB       0.30 Hz
GB       0
PC       1.00
  
```

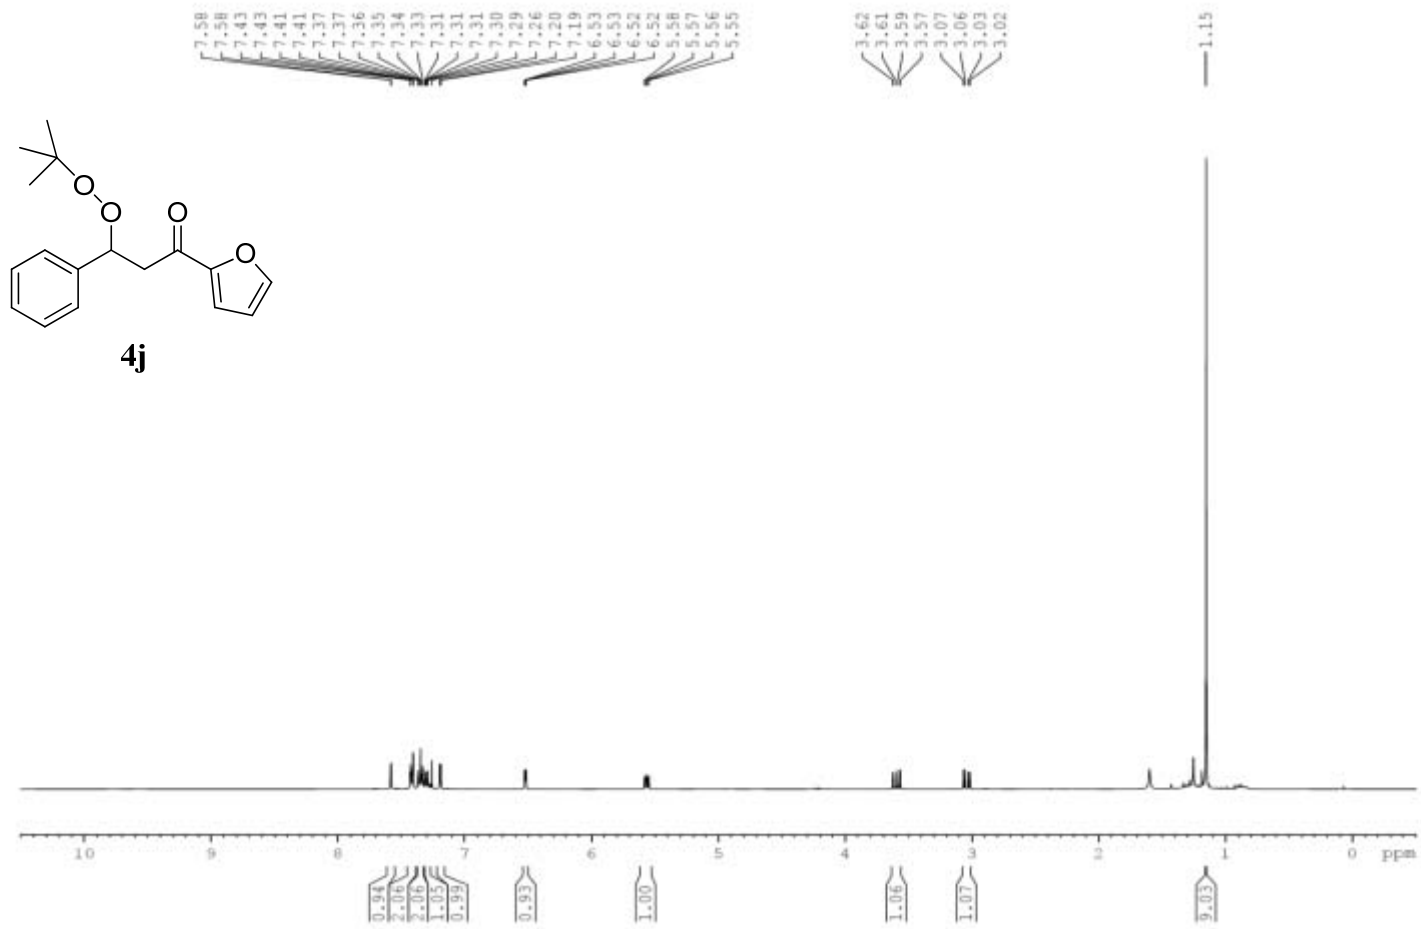

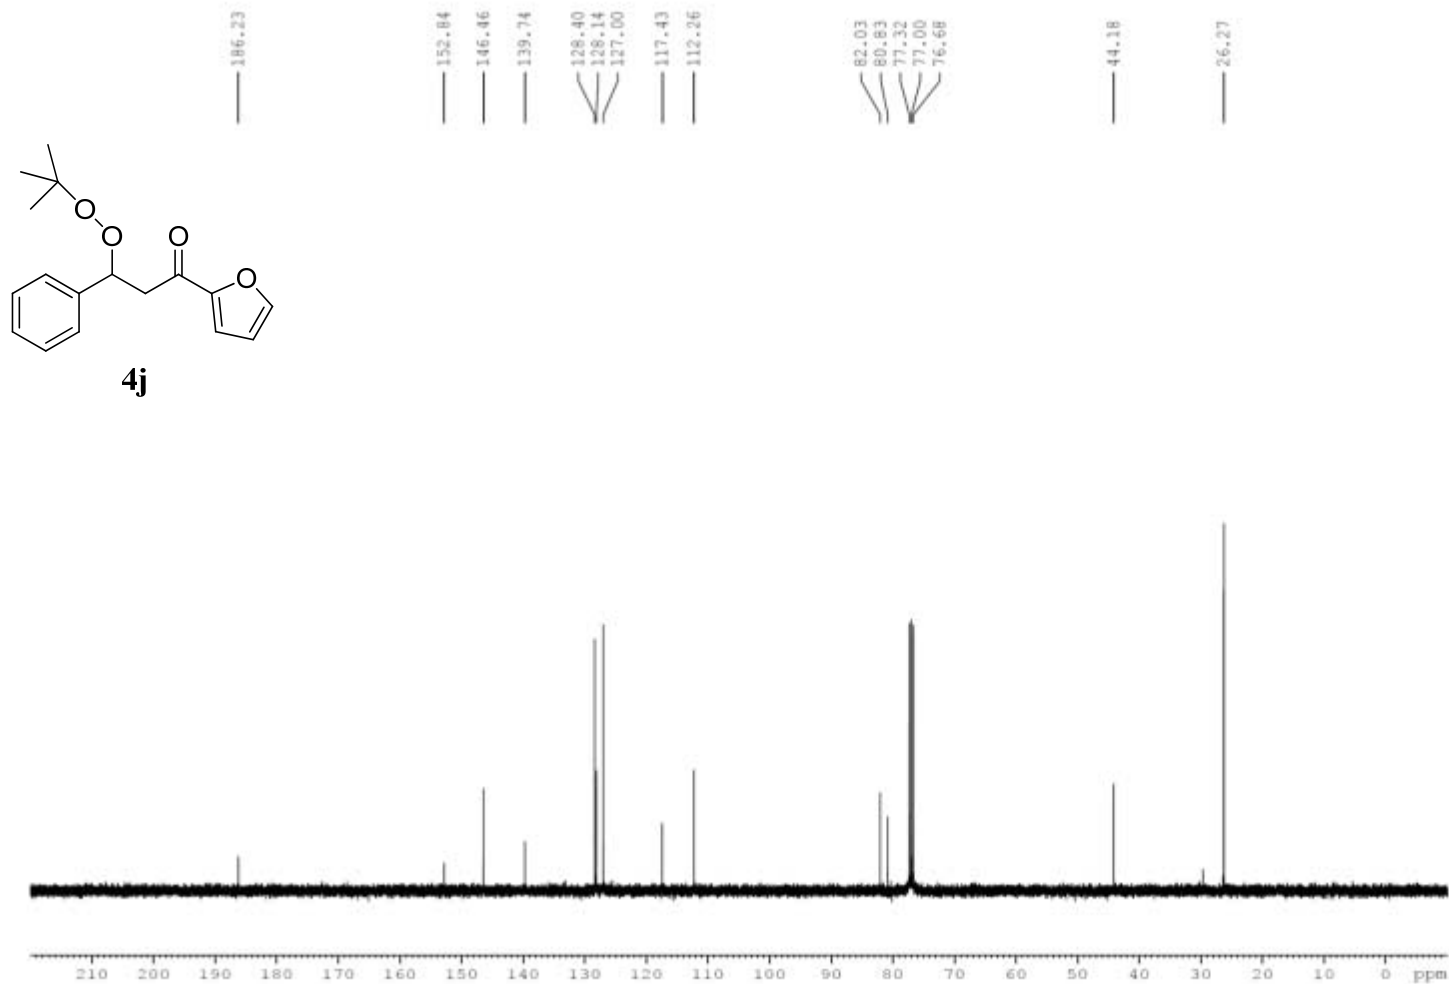

```

Current Data Parameters
NAME      960-2-C-G.fid
EXPNO     1
PROCNO    1

F2 - Acquisition Parameters
Date_     20131025
Time      0.00
INSTRUM   Varian
PROBHD    zlpul
PULPROG   zgpg30
TD         65536
SOLVENT   cdcl3
NS         348
DS         0
SWH        25510.203 Hz
FIDRES     0.389255 Hz
AQ         1.3107700 sec
RG         4
DM         19.600 usec
DE         115.71 usec
TE         298.0 K

F2 - Processing parameters
SI         65536
SF         100.6219572 MHz
WDW        EM
SSB        0
LB         0.30 Hz
GB         0
PC         1.00

```



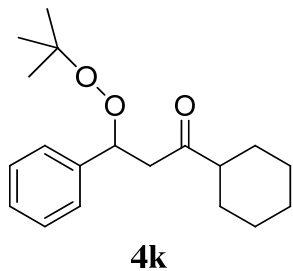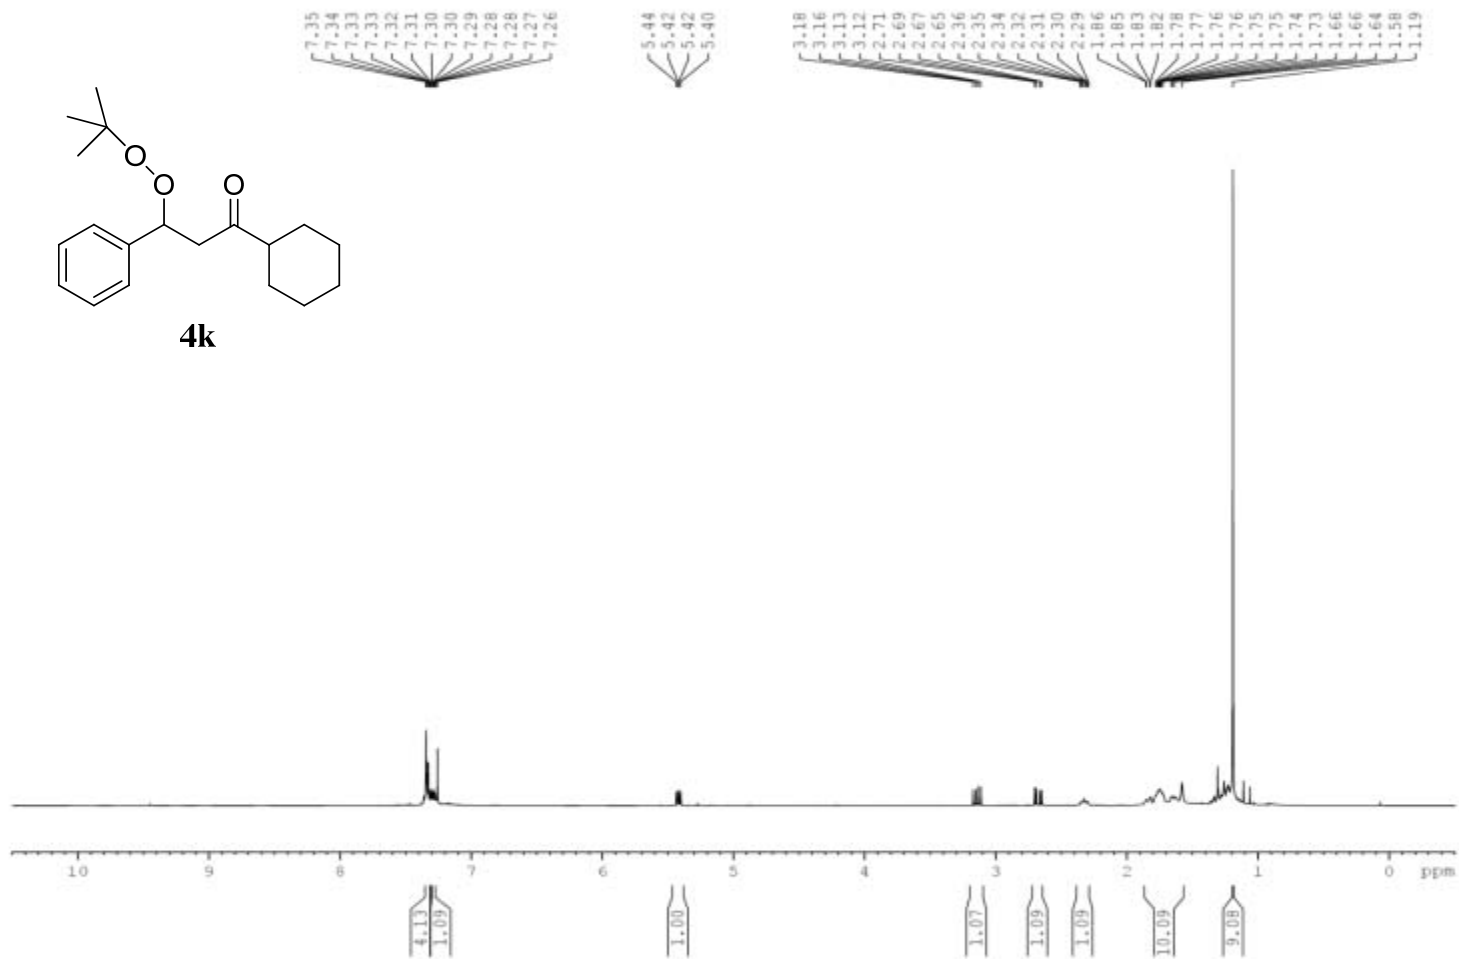

Current Data Parameters  
 NAME RA-CY-OP.fid  
 EXPNO 1  
 PROCNO 1

F2 - Acquisition Parameters  
 Date\_ 20131012  
 Time\_ 0.00  
 INSTRUM Varian  
 PROBHD  
 PULPROG s2pul  
 TD 32768  
 SOLVENT cdcl3  
 NS 40  
 DS 0  
 SWH 6410.256 Hz  
 FIDRES 0.195625 Hz  
 AQ 2.5559540 sec  
 RG 4  
 DW 78.000 usec  
 DE 115.71 usec  
 TE 298.0 K

F2 - Processing parameters  
 SI 32768  
 SF 399.7427406 MHz  
 MW EM  
 SSB 0  
 LB 0.30 Hz  
 GB 0  
 PC 1.00

210.90

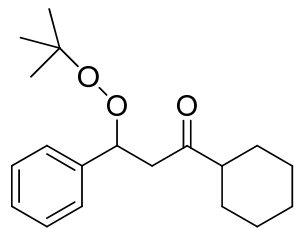

4k

140.18

128.22  
127.96  
126.94

81.96  
80.70  
77.32  
77.00  
76.68

51.48  
46.05

28.05  
28.01  
26.37  
25.84  
25.63  
25.54

Current Data Parameters  
NAME BA-CY-OP-C.fid  
EXPNO 1  
PROCNO 1

F2 - Acquisition Parameters  
Date\_ 20131012  
Time 0.00  
INSTRUM Varian  
PROBHD s2pul  
PULPROG zgpg30  
TD 65536  
SOLVENT cdcl3  
NS 812  
DS 0  
SWH 25510.203 Hz  
FIDRES 0.389255 Hz  
AQ 1.3107700 sec  
RG 4  
DM 19.600 usec  
DE 115.71 usec  
TE 298.0 K

F2 - Processing parameters  
SI 65536  
SF 100.5218564 MHz  
MNM EM  
SBB 0  
LB 0.30 Hz  
GB 0  
PC 1.00

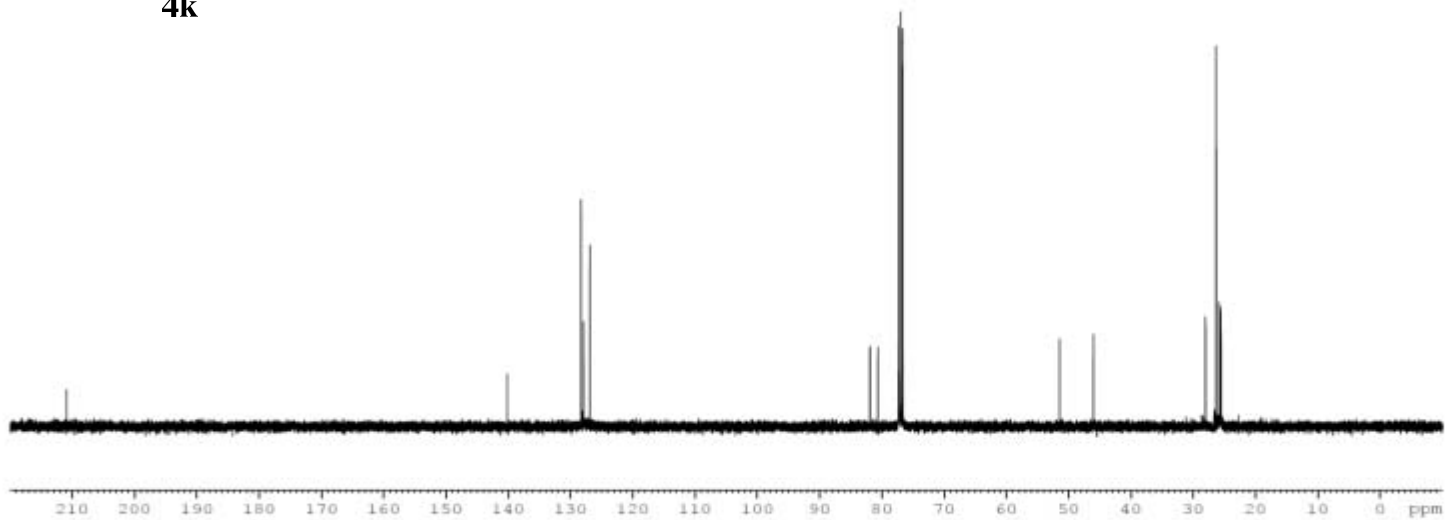

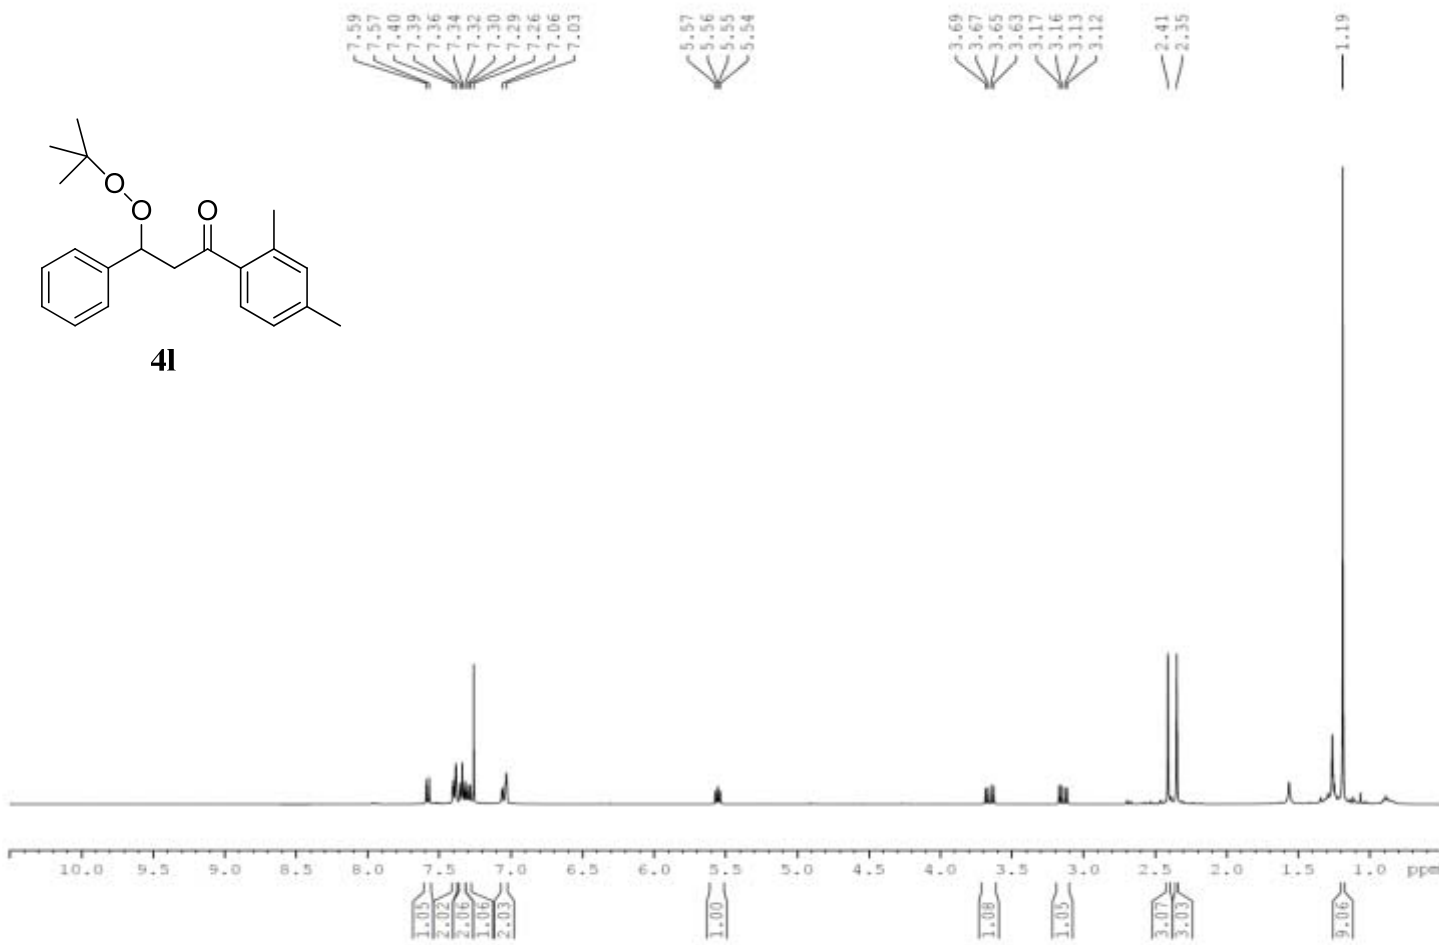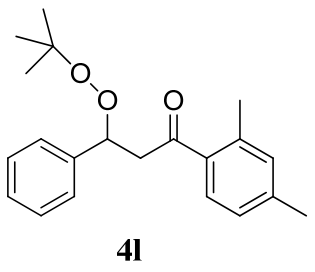

Current Data Parameters  
NAME RA-200-OP-N-G.fid  
EXPNO 1  
PROCNO 1

F2 - Acquisition Parameters  
Date\_ 20131226  
Time\_ 0.00  
INSTRUM Varian  
PROBHD  
PULPROG s2pul1  
TD 32768  
SOLVENT cdcl3  
NS 32  
DS 0  
SWH 6402.049 Hz  
FIDRES 0.195375 Hz  
AQ 2.5559540 sec  
RG 4  
DW 78.100 usec  
DE 115.71 usec  
TE 298.0 K

F2 - Processing parameters  
SI 32768  
SF 399.7627607 MHz  
WDW EM  
SSB 0  
LB 0.30 Hz  
GB 0  
PC 1.00

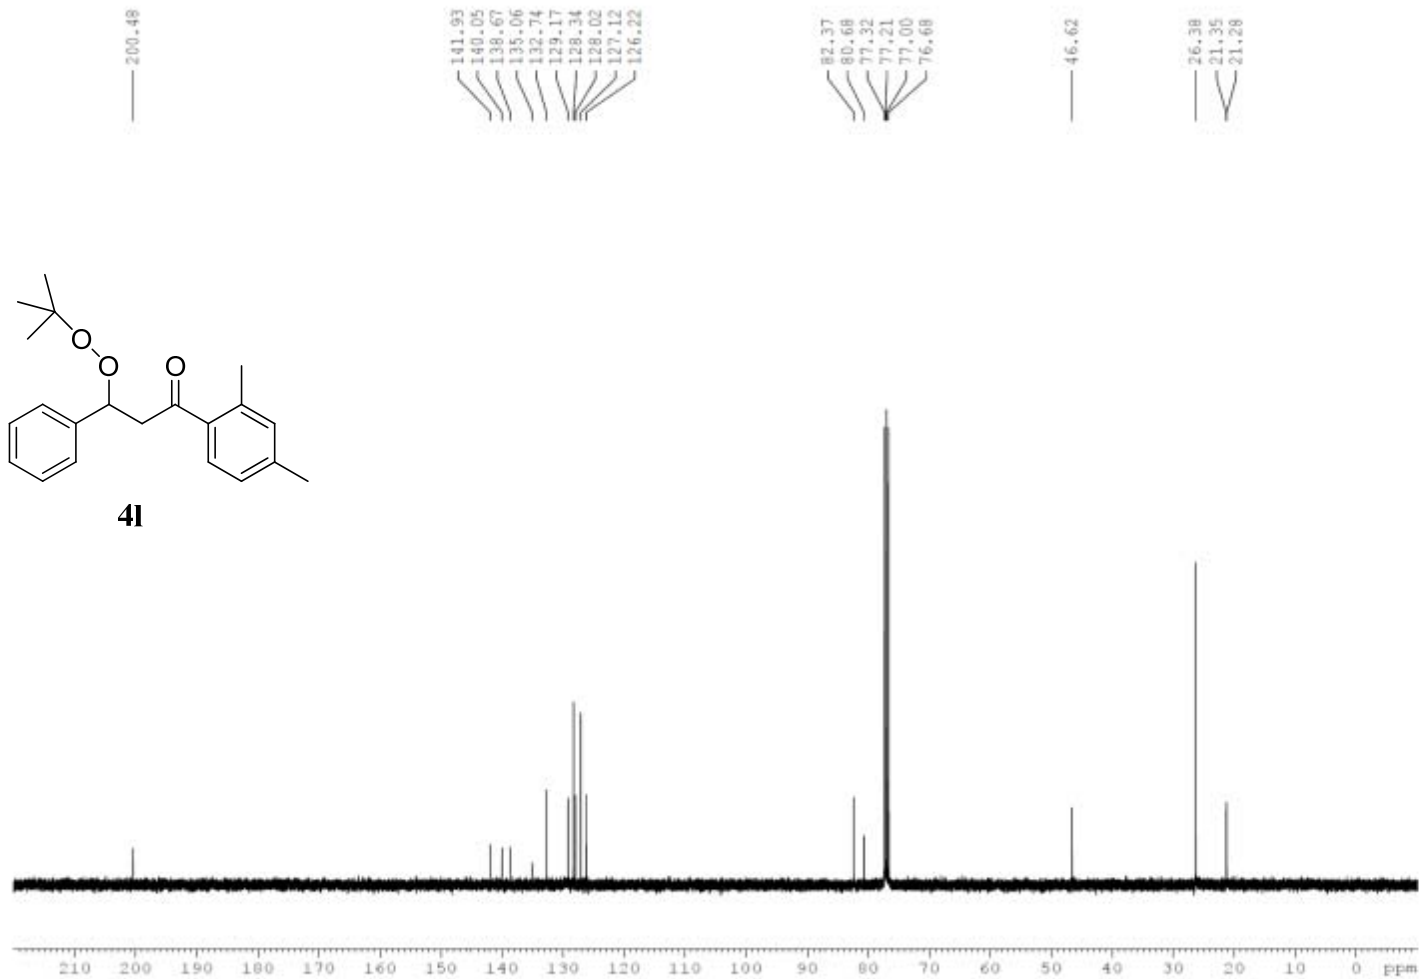

```

Current Data Parameters
NAME      RA-200-1-2-C.fid
EXPNO     1
PROCNO    1

F2 - Acquisition Parameters
Date_     20131216
Time      0.00
INSTRUM   Varian
PROBHD
PULPROG   a2pul
TD         65536
SOLVENT   cdcl3
NS         1196
DS         0
SWH        25510.203 Hz
FIDRES     0.389255 Hz
AQ         1.3107700 sec
RG         4
DW         19.600 usec
DE         115.71 usec
TE         298.0 K

F2 - Processing parameters
SI         65536
SF         100.5218574 MHz
WDW        EM
SSB        0
LB         0.30 Hz
GB         0
PC         1.00

```

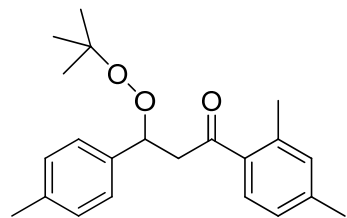

4m

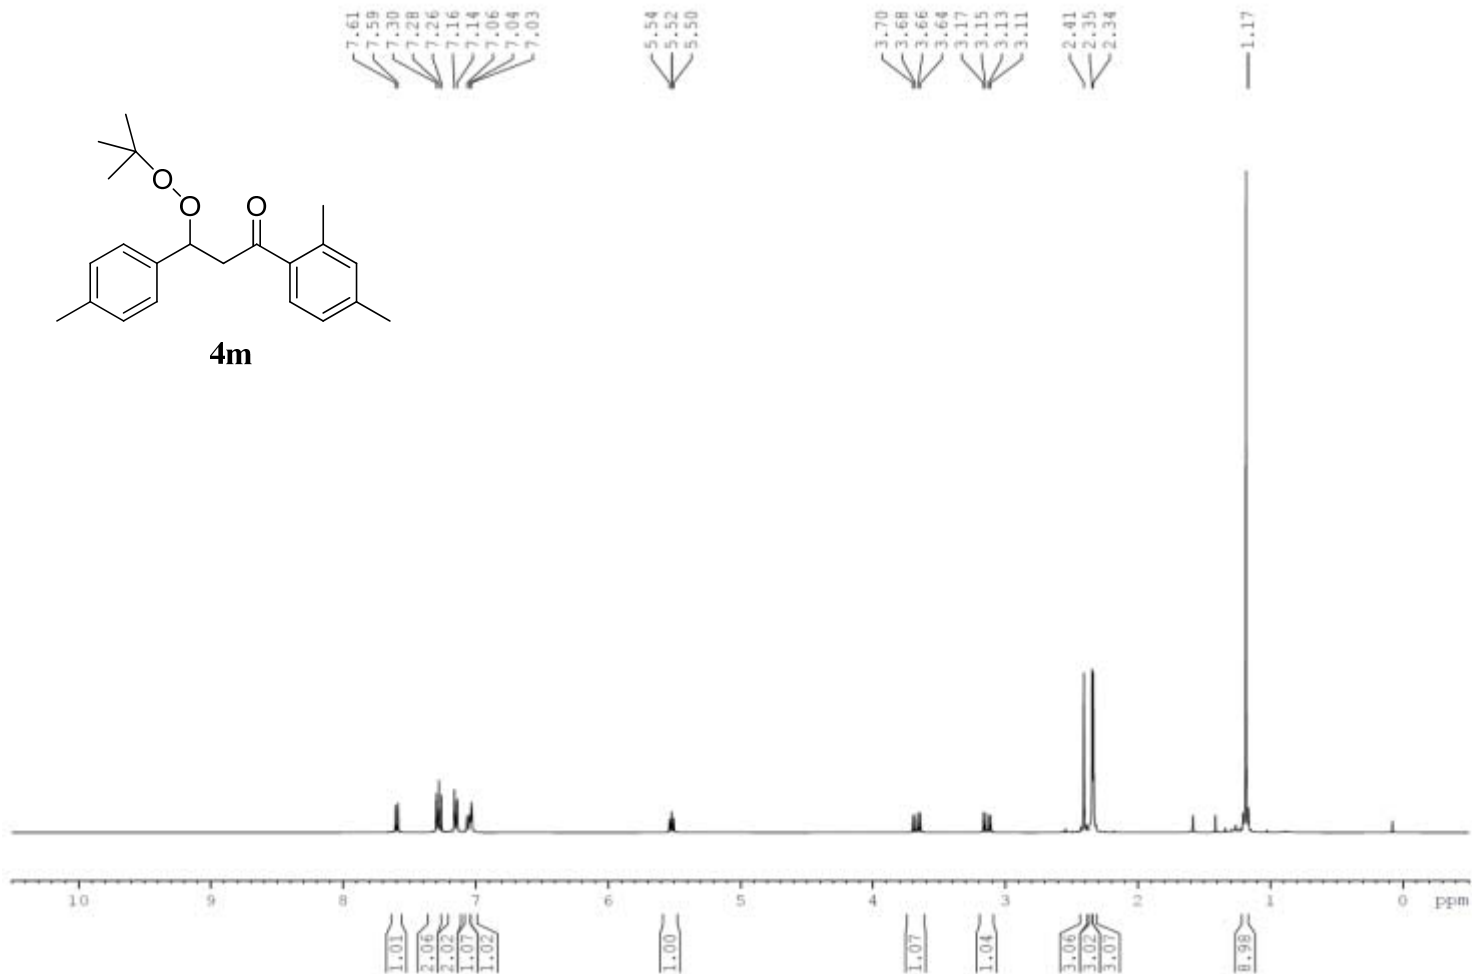

```

Current Data Parameters
NAME      RA-198-0F.fid
EXPNO     1
PROCNO    1

F2 - Acquisition Parameters
Date_     20131221
Time      0.00
INSTRUM   varian
PROBHD
PULPROG   zgpg30
TD         32768
SOLVENT   cdcl3
NS         32
DS         0
SWH        6410.256 Hz
FIDRES     0.195625 Hz
AQ         1.5559540 sec
RG         4
DW         70.000 usec
DE         115.71 usec
TE         298.0 K

F2 - Processing parameters
SI         32768
SF         399.7627610 MHz
WDW        EM
SSB        0
LB         0.30 Hz
GB         0
PC         1.00
  
```

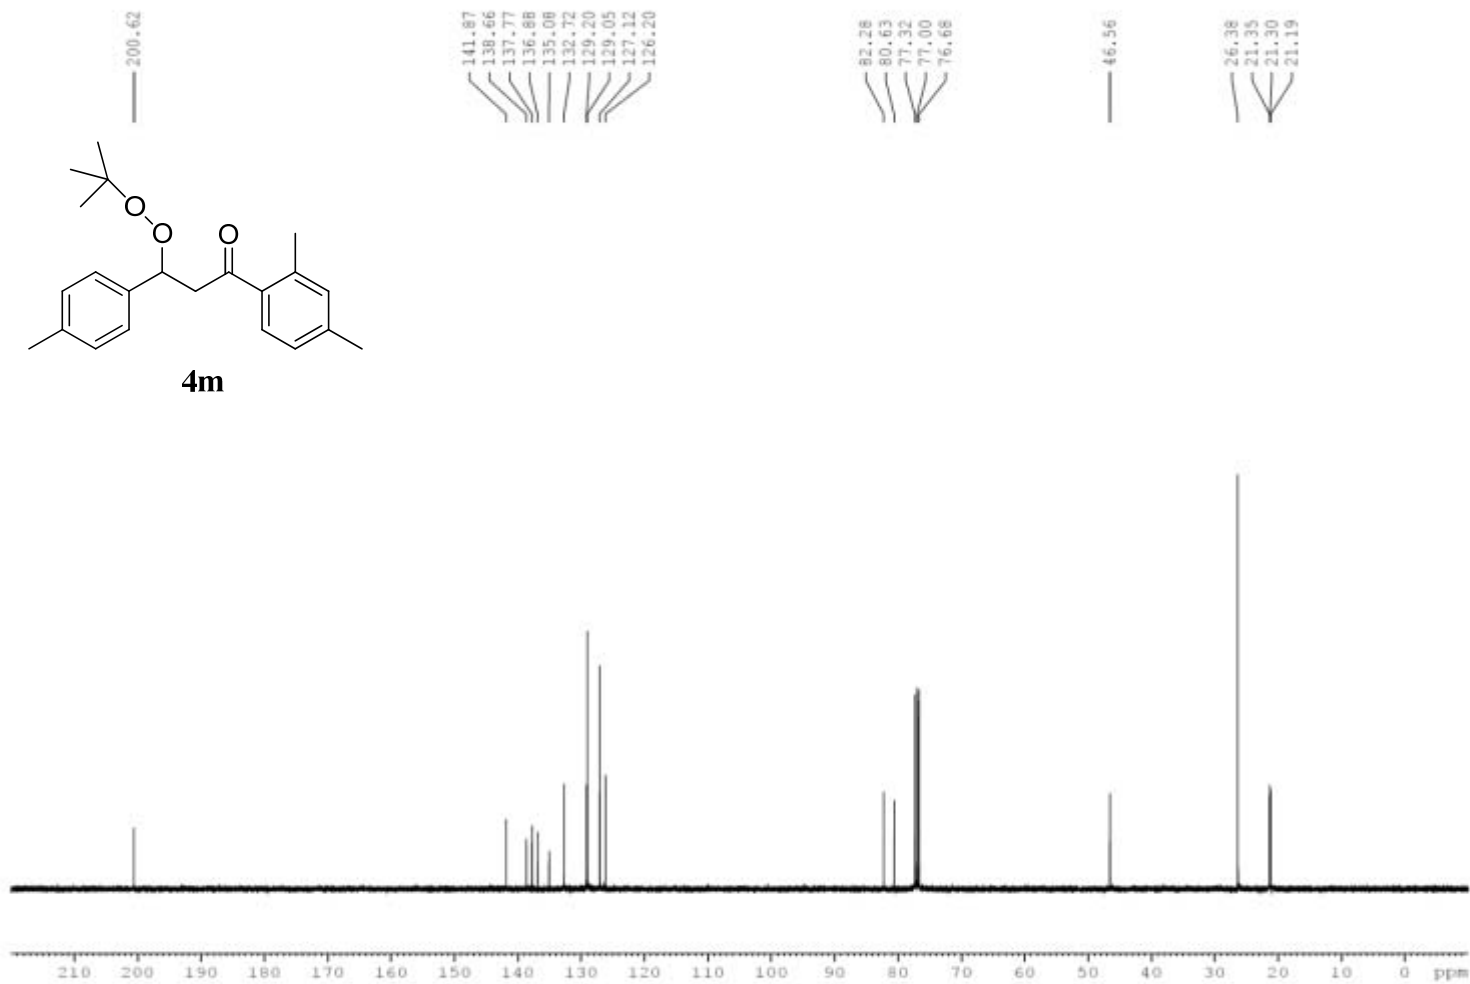

```

Current Data Parameters
NAME      RA-198-OP-C-G.fid
EXPNO     1
PROCNO    1

F2 - Acquisition Parameters
Date_     20131221
Time      0.00
INSTRUM   varian
PROBHD
PULPROG   zgpg30
TD         65536
SOLVENT   cdcl3
NS         724
DS         0
SWH        25510.203 Hz
FIDRES     0.389255 Hz
AQ         1.3107700 sec
RG         4
DW         19.600 usec
DE         115.71 usec
TE         298.0 K

F2 - Processing parameters
SI         65536
SF         100.6218586 MHz
WDW        EM
SSB        0
LB         0.30 Hz
GB         0
PC         1.00

```

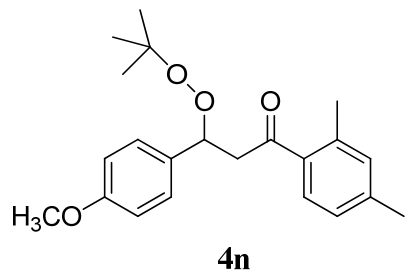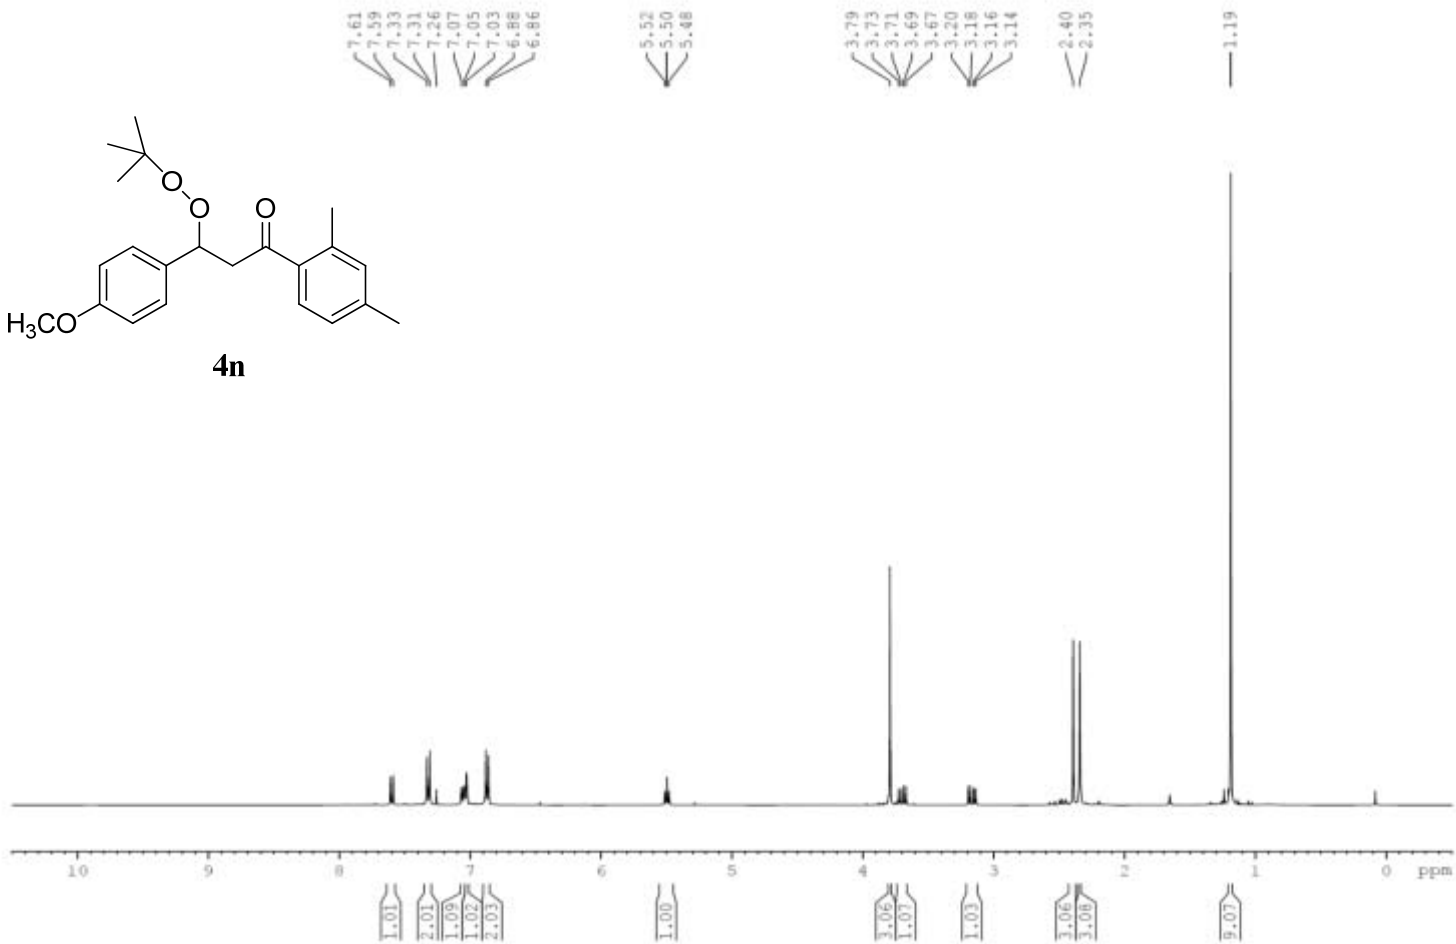

Current Data Parameters  
 NAME RA-199-OP.fid  
 EXPNO 1  
 PROCNO 1  
 F2 - Acquisition Parameters  
 Date\_ 20131225  
 Time 0.00  
 INSTRUM varian  
 PROBHD  
 PULPROG zgpg30  
 TD 32768  
 SOLVENT cdc13  
 NS 512  
 DS 0  
 SWH 6410.256 Hz  
 FIDRES 0.195625 Hz  
 AQ 2.5559540 sec  
 RG 4  
 DW 78.000 usec  
 DE 115.71 usec  
 TE 298.0 K  
 F2 - Processing parameters  
 SI 32768  
 SF 399.7627412 MHz  
 WDW EM  
 SSB 0  
 LB 0.30 Hz  
 GB 0  
 PC 1.00

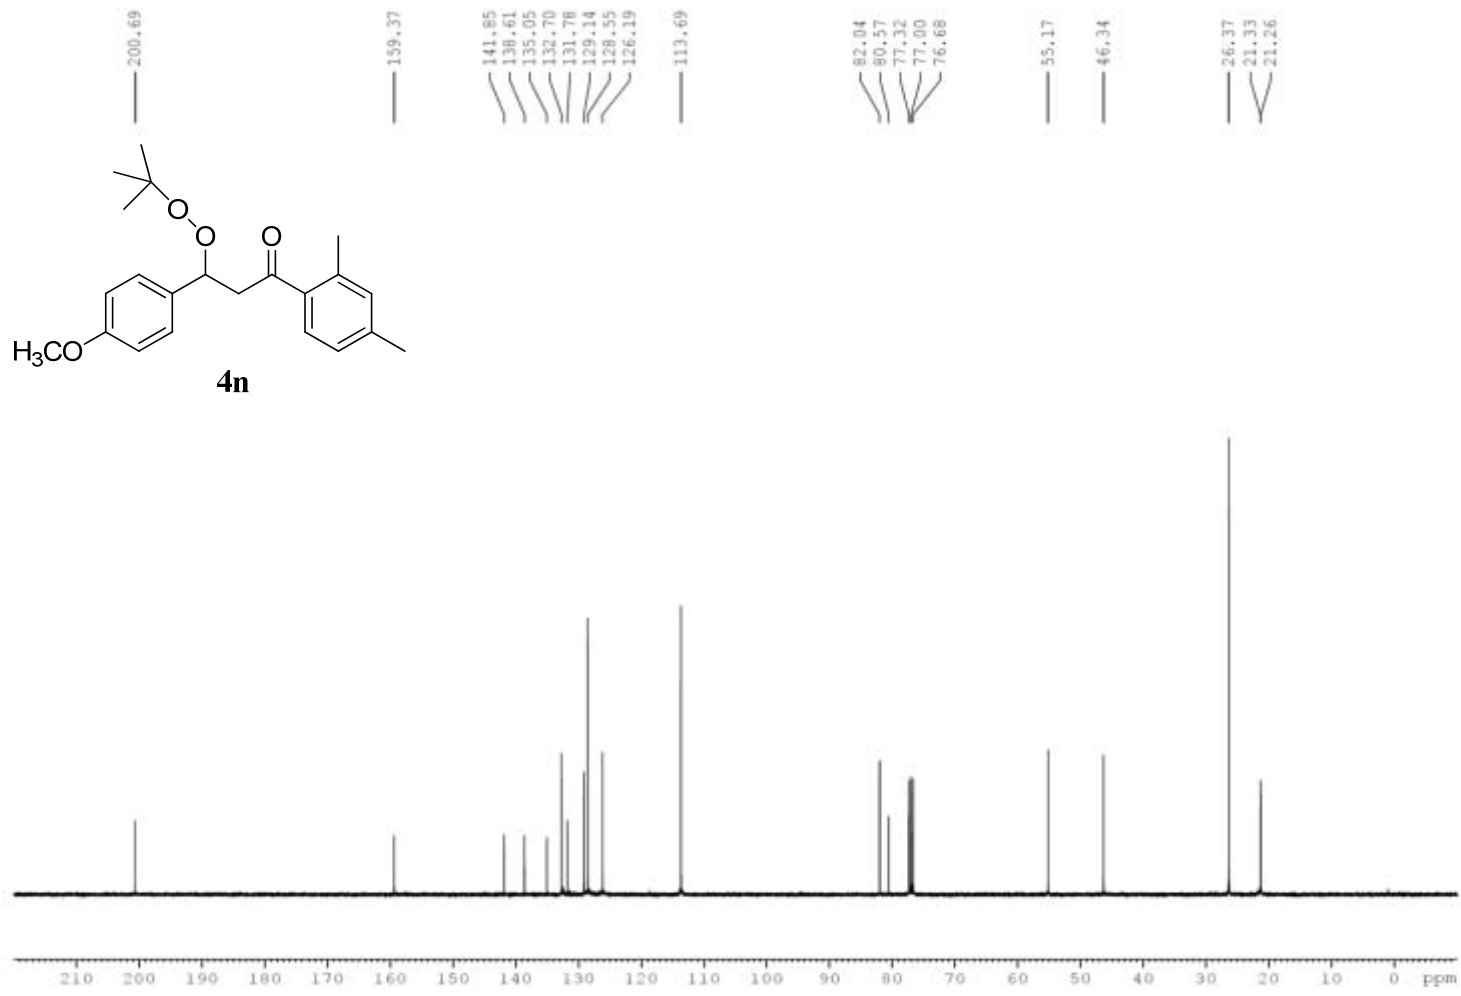

Current Data Parameters  
 NAME BA-199-OP-C-Q-3.fid  
 EXPNO 1  
 PROCNO 1

F2 - Acquisition Parameters  
 Date\_ 20131225  
 Time 0.00  
 INSTRUM varian  
 PROBHD  
 PULPROG s2pul  
 TD 65536  
 SOLVENT cdc13  
 NS 564  
 DS 0  
 SWH 25510.203 Hz  
 FIDRES 0.389255 Hz  
 AQ 1.3107700 sec  
 RG 4  
 DW 19.600 usec  
 DE 115.71 usec  
 TE 298.0 K

F2 - Processing parameters  
 SI 65536  
 SF 100.5218617 MHz  
 WCW EM  
 SSB 0  
 LB 0.30 Hz  
 GB 0  
 PC 1.00



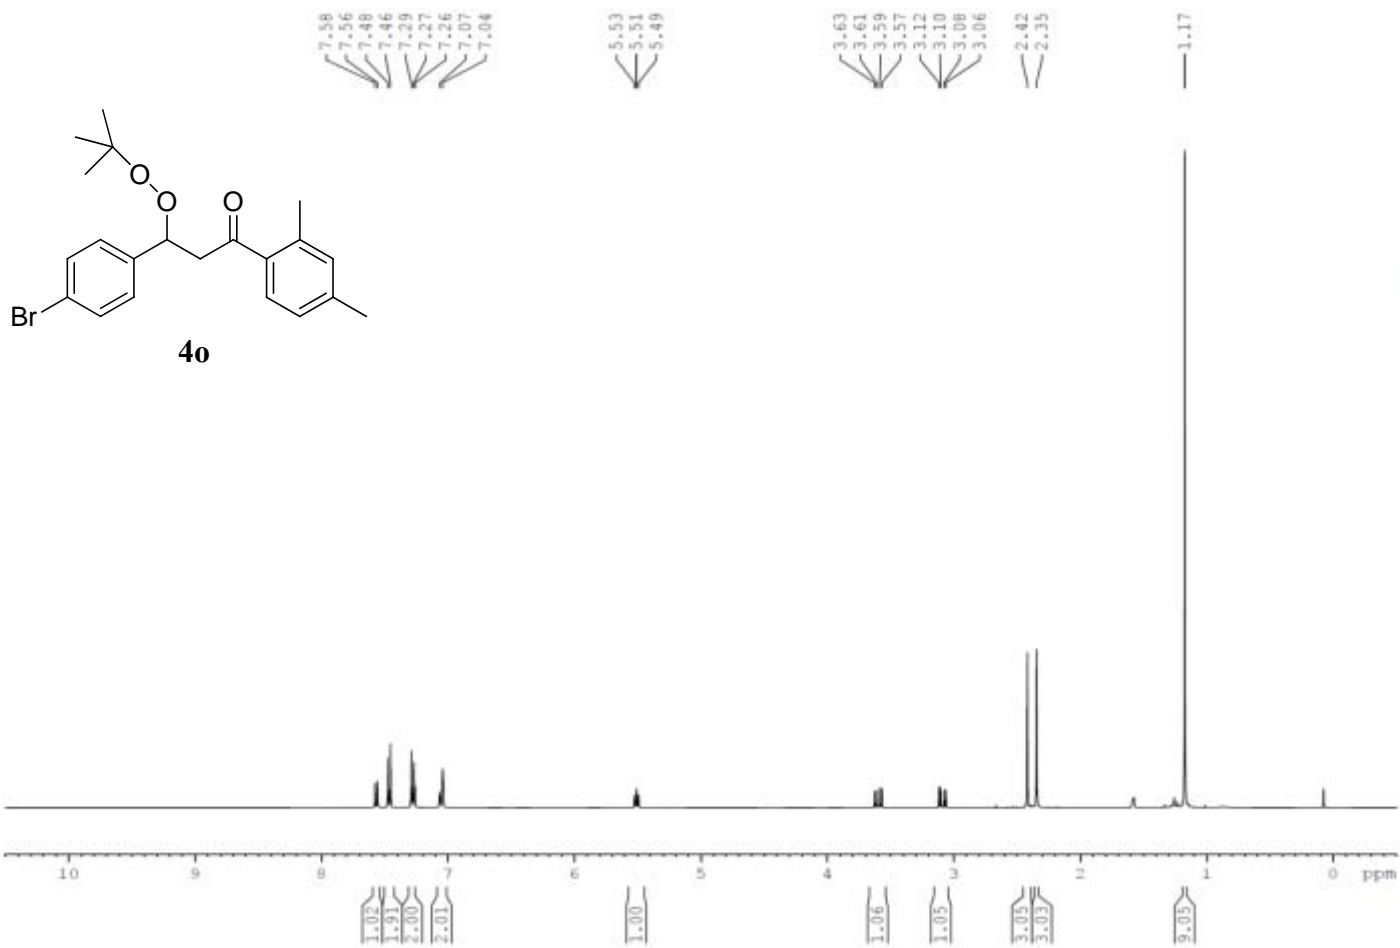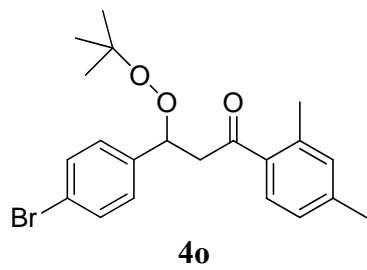

Current Data Parameters  
 NAME 981-1-H-G-1.fid  
 EXPNO 1  
 PROCNO 1

F2 - Acquisition Parameters  
 Date\_ 20131030  
 Time\_ 0.00  
 INSTRUM varian  
 PROBHD  
 PULPROG s2pul  
 TD 32768  
 SOLVENT cdcl3  
 NS 32  
 DS 0  
 SWH 6410.256 Hz  
 FIDRES 0.195625 Hz  
 AQ 2.5559540 sec  
 RG 4  
 DW 78.000 usec  
 DE 115.71 usec  
 TE 298.0 K

F2 - Processing parameters  
 SI 32768  
 SF 399.7627605 MHz  
 WDW EM  
 SSB 0  
 LB 0.30 Hz  
 GB 0  
 PC 1.00

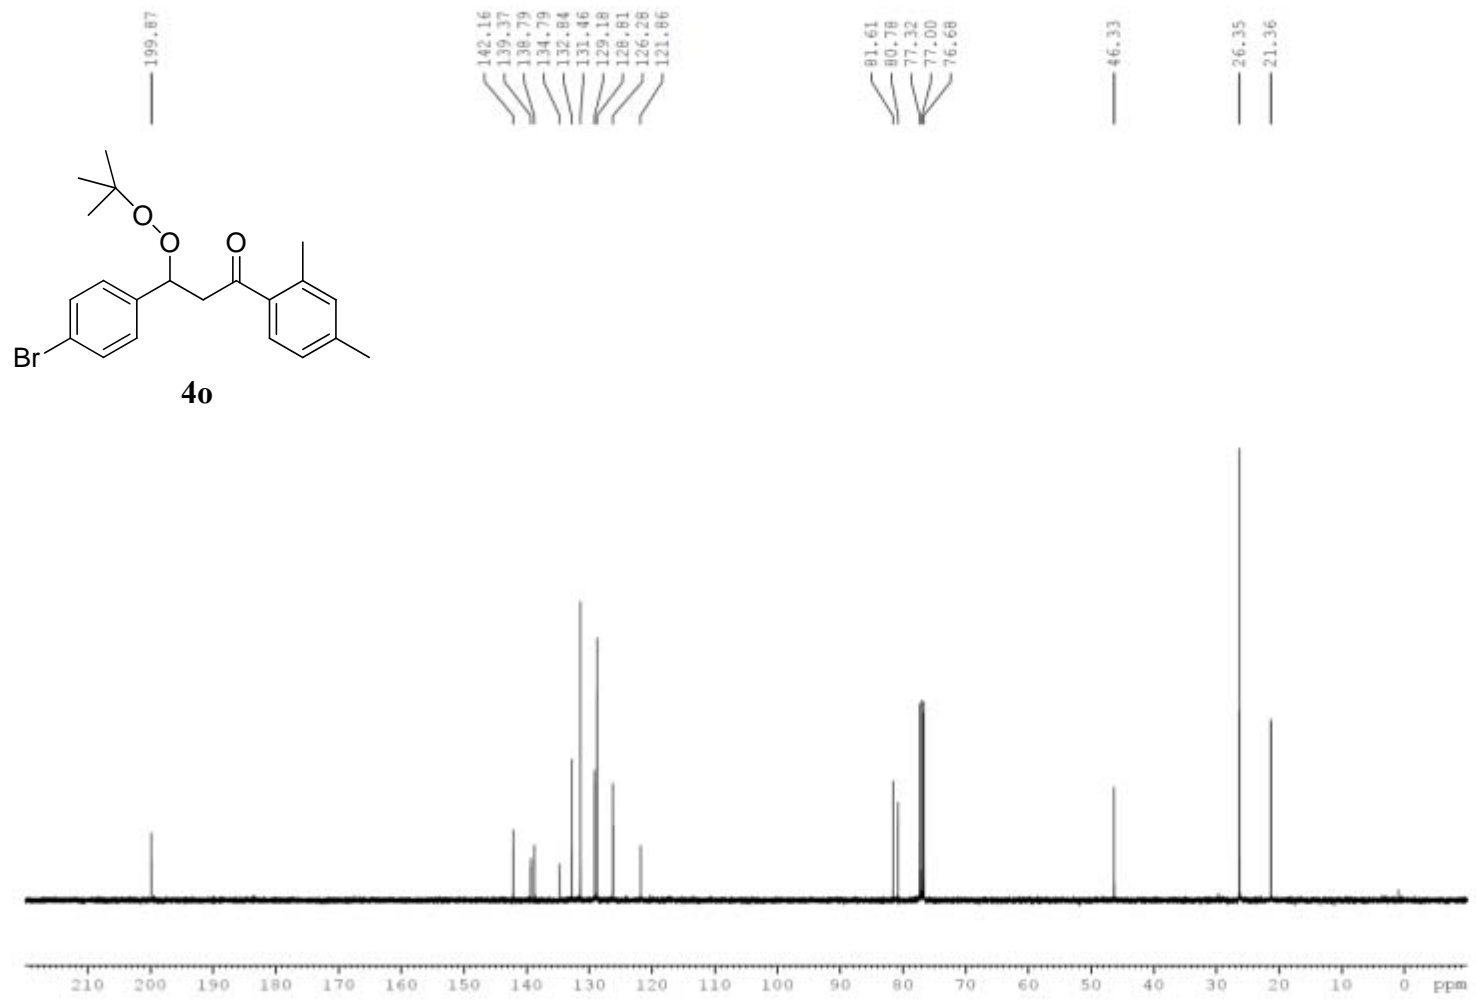

```

Current Data Parameters
NAME      981-1-C-G-2.fid
EXPNO     1
PROCNO    1

F2 - Acquisition Parameters
Date_     20131030
Time      0.00
INSTRUM   varian
PROBHD
PULPROG   s2pul
TD         65536
SOLVENT   cdcl3
NS         800
DS         0
SWH        25510.203 Hz
FIDRES     0.389255 Hz
AQ         1.3107700 sec
RG         4
DW         19.600 usec
DE         115.71 usec
TE         298.0 K

F2 - Processing parameters
SI         65536
SF         100.5218574 MHz
WDW        EM
SSB        0
LB         0.30 Hz
GB         0
PC         1.00

```

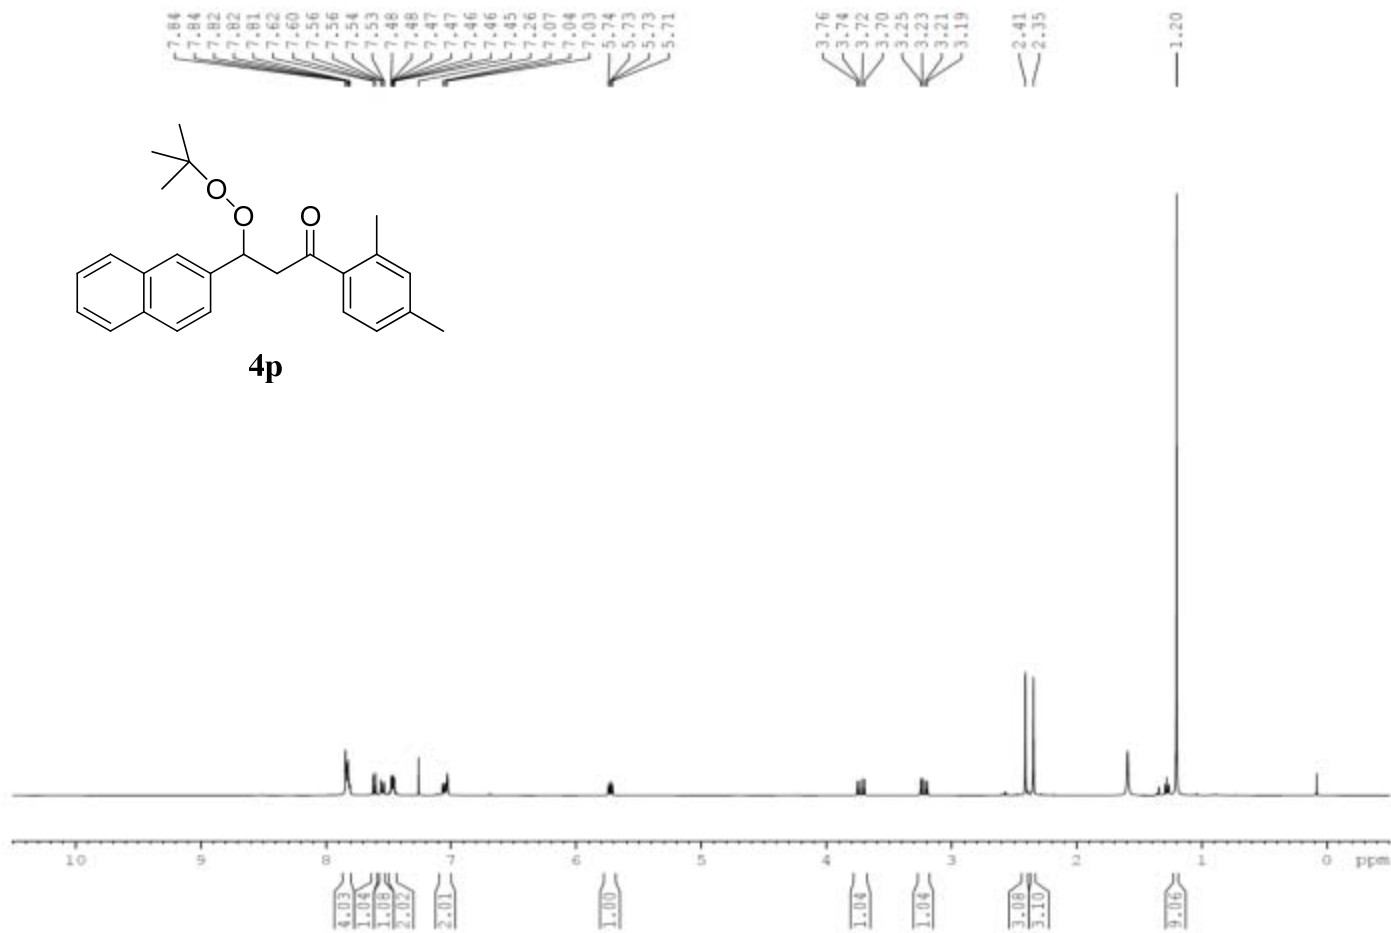

Current Data Parameters  
 NAME 982-2-G-G.fid  
 EXPNO 1  
 PROCNO 1

F2 - Acquisition Parameters  
 Date\_ 20131107  
 Time 0.00  
 INSTRUM varian  
 PROBHD  
 PULPROG s2pul  
 TD 32768  
 SOLVENT cdcl3  
 NS 32  
 DS 0  
 SWH 6402.049 Hz  
 FIDRES 0.195375 Hz  
 AQ 2.5559540 sec  
 RG 4  
 DW 78.100 usec  
 DE 115.71 usec  
 TE 298.0 K

F2 - Processing parameters  
 SI 32768  
 SF 399.7627600 MHz  
 WDW EM  
 SSB 0  
 LB 0.30 Hz  
 GB 0  
 PC 1.00

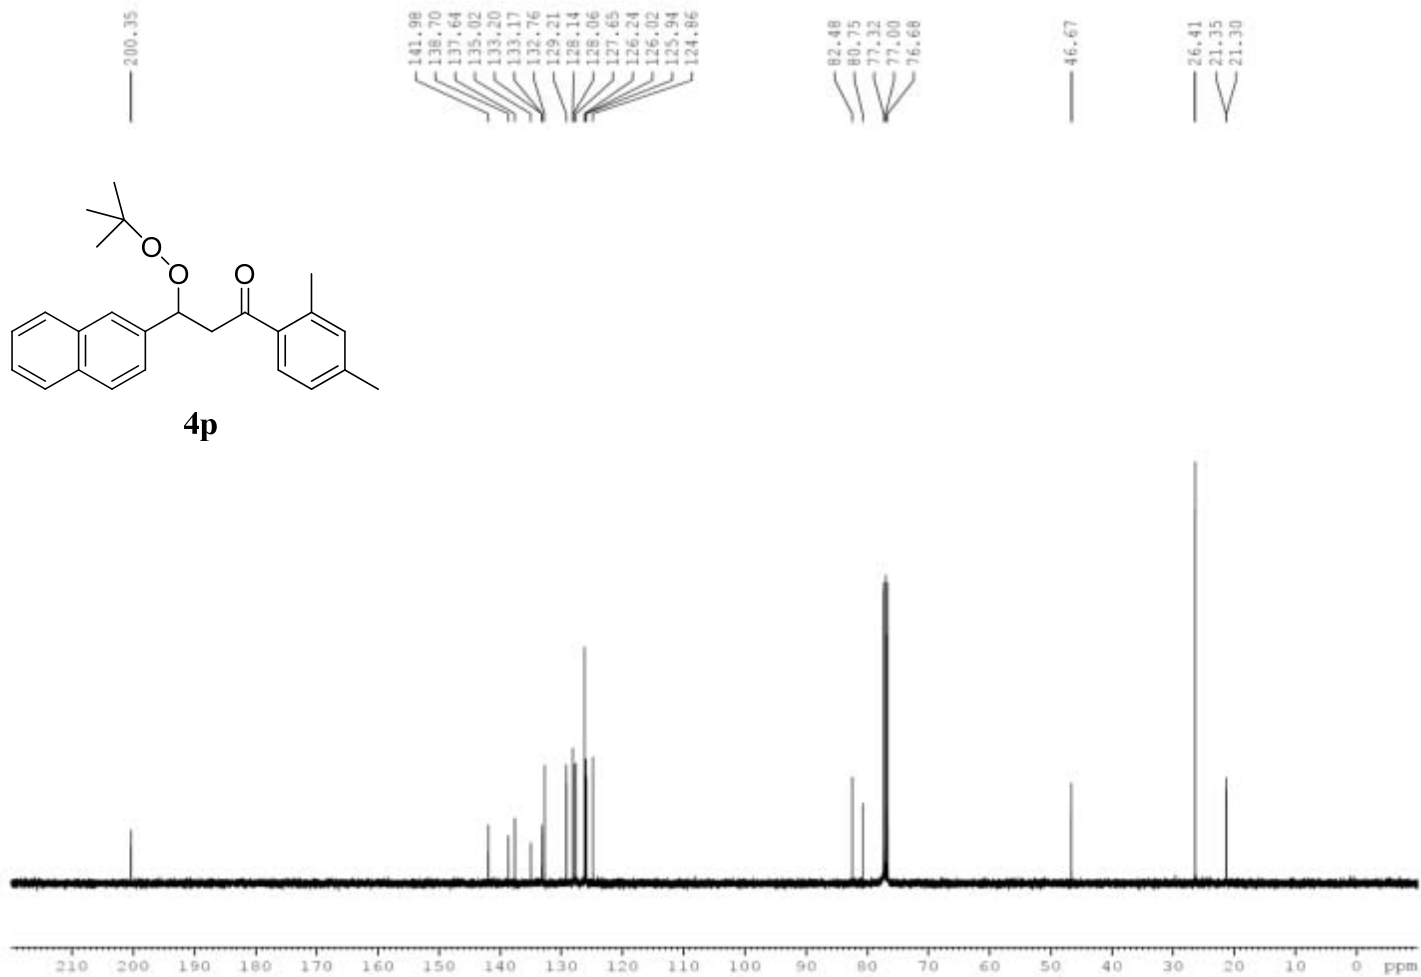

Current Data Parameters  
 NAME 982-2-1-C-G-2-G.fid  
 EXPNO 1  
 PROCNO 1

F2 - Acquisition Parameters  
 Date\_ 20131104  
 Time\_ 0.00  
 INSTRUM varian  
 PROBHD  
 PULPROG s2pul  
 TD 65536  
 SOLVENT cdcl3  
 NS 1000  
 DS 0  
 SWH 25510.203 Hz  
 FIDRES 0.389255 Hz  
 AQ 1.3107700 sec  
 RG 4  
 DW 19.600 usec  
 DE 115.71 usec  
 TE 298.0 K

F2 - Processing parameters  
 SI 65536  
 SF 100.5218578 MHz  
 WDW EM  
 SSB 0  
 LB 0.30 Hz  
 GB 0  
 PC 1.00

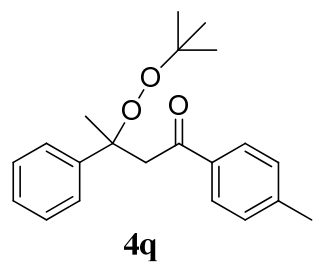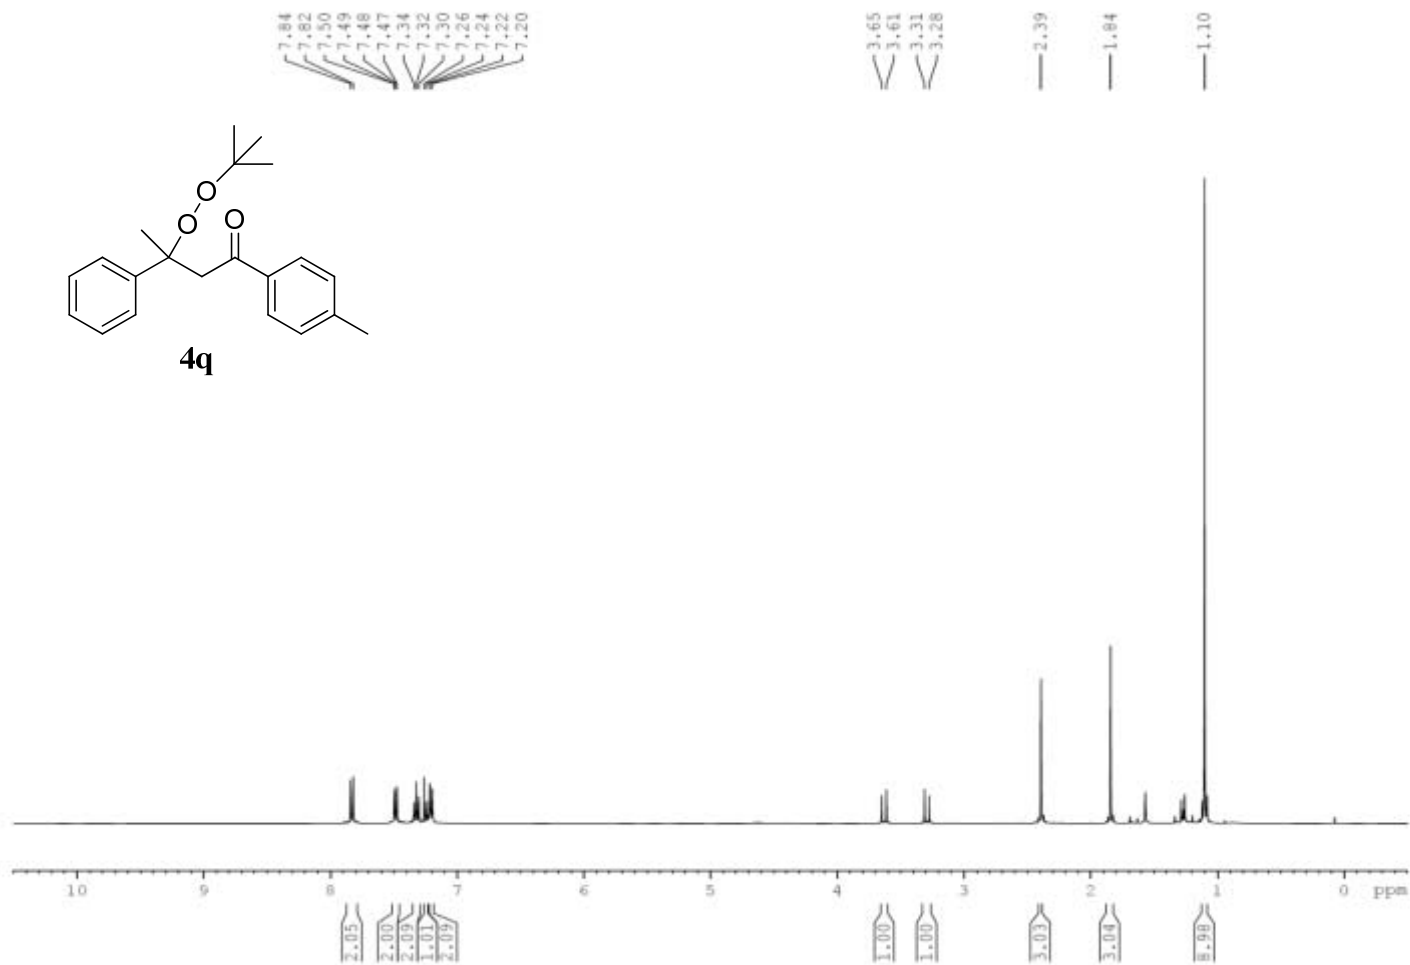

Current Data Parameters  
 NAME 1010-1-1.fid  
 EXPNO 1  
 PROCNO 1

F2 - Acquisition Parameters  
 Date\_ 20131221  
 Time\_ 0.00  
 INSTRUM Varian  
 PROBHD  
 PULPROG s2pul  
 TD 32768  
 SOLVENT cdc13  
 NS 32  
 DS 0  
 SWH 6410.256 Hz  
 FIDRES 0.195625 Hz  
 AQ 2.5559540 sec  
 RG 4  
 DW 78.000 usec  
 DE 115.71 usec  
 TE 298.0 K

F2 - Processing parameters  
 SI 32768  
 SF 399.7627611 MHz  
 WDW EM  
 SSB 0  
 LB 0.30 Hz  
 GB 0  
 PC 1.00

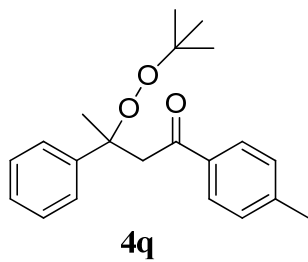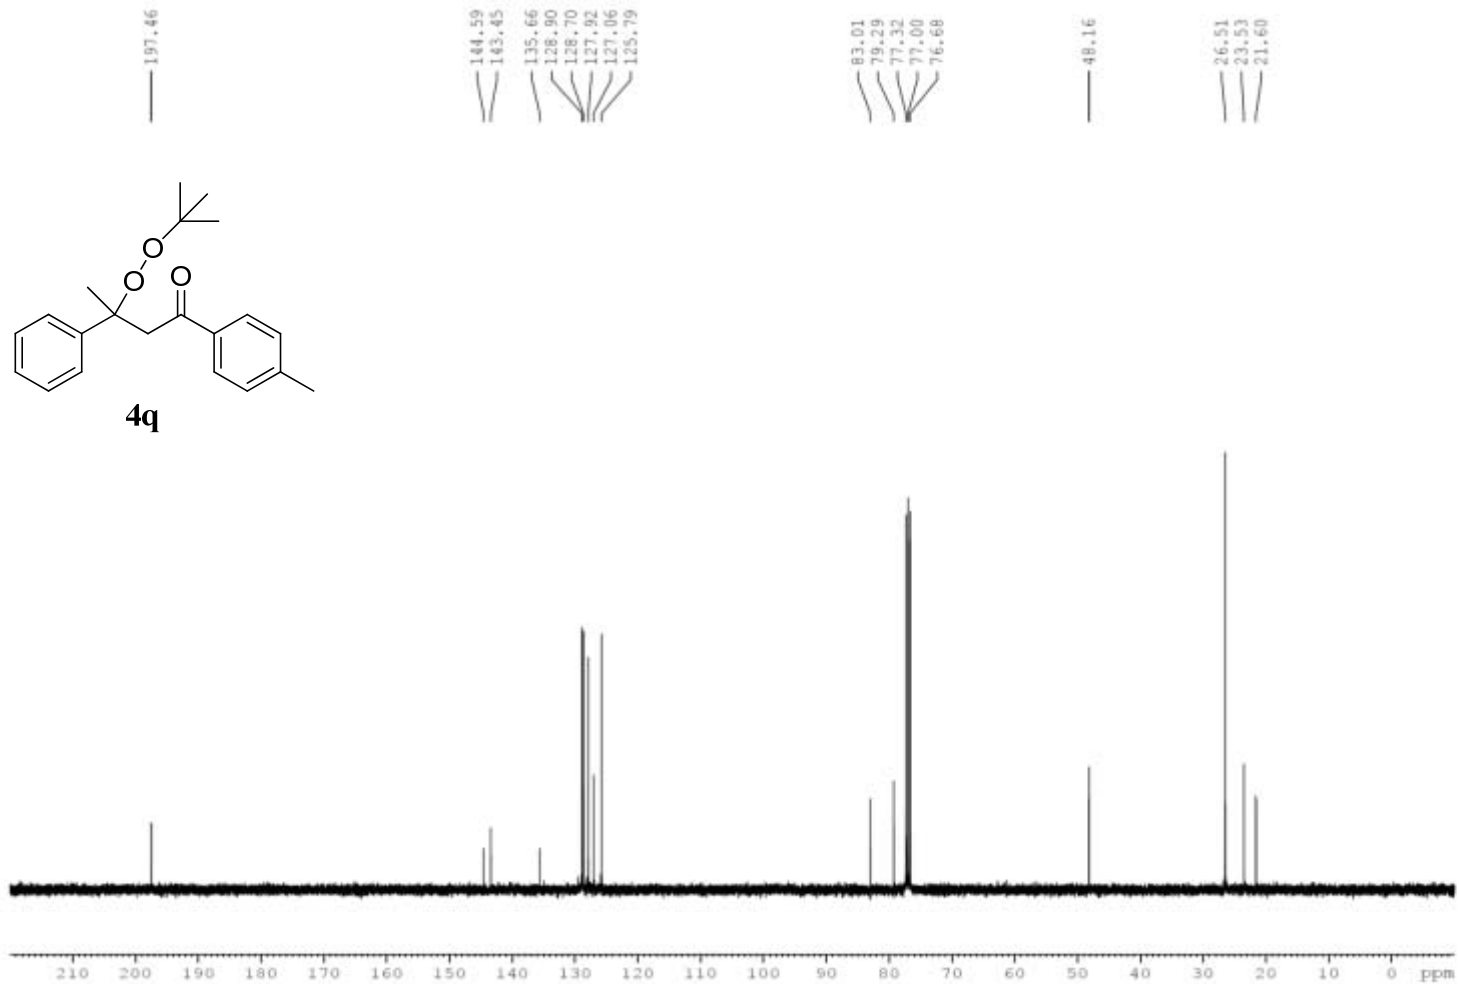

Current Data Parameters  
 NAME 1010-1-1-C-G-G.fid  
 EXPNO 1  
 PROCNO 1

F1 - Acquisition Parameters  
 Date\_ 20131221  
 Time 0.00  
 INSTRUM varian  
 PROCNO 1  
 PULPROG zgpg30  
 TD 45536  
 SOLVENT cdcl3  
 NS 640  
 DS 0  
 SWH 25510.203 Hz  
 FIDRES 0.389255 Hz  
 AQ 1.3107700 sec  
 RG 4  
 DW 19.600 usec  
 DE 115.71 usec  
 TE 298.0 K

F2 - Processing parameters  
 SI 45536  
 SF 100.5219570 MHz  
 WDW EM  
 SSB 0  
 LB 0.30 Hz  
 GB 0  
 PC 1.00

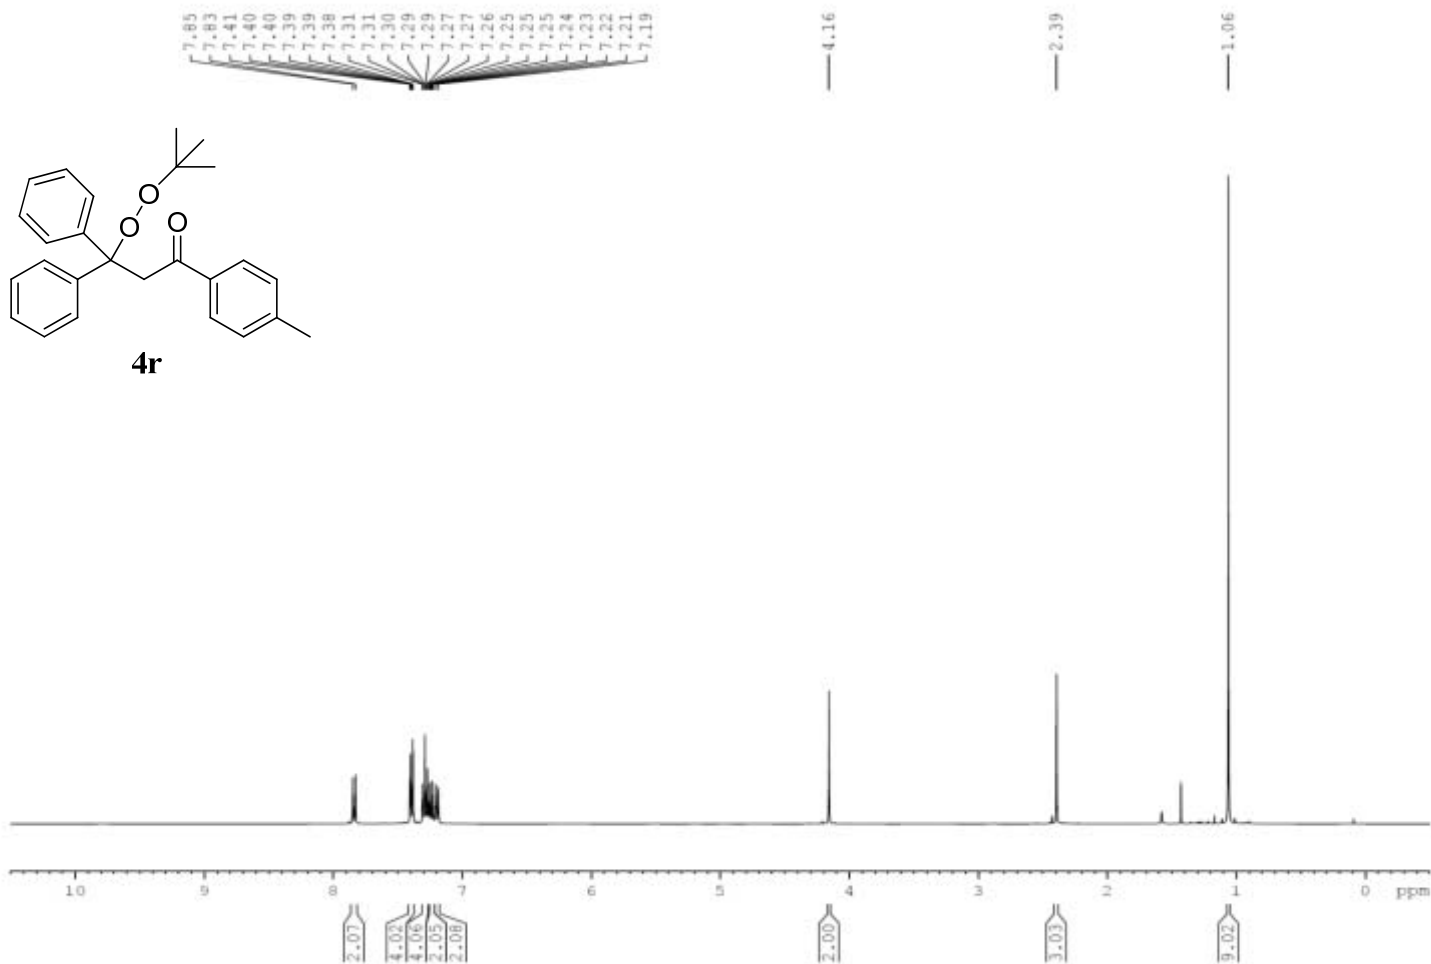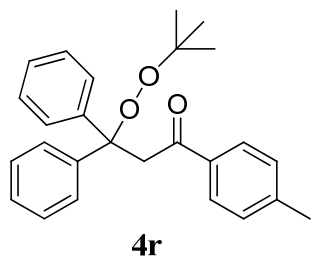

```

Current Data Parameters
NAME      1011-1-2-G.fid
EXPNO     1
PROCNO    1

F2 - Acquisition Parameters
Date_     20131224
Time      0.00
INSTRUM   Varian
PROBHD
PULPROG   s2pul
TD         32768
SOLVENT   cdcl3
NS         40
DS         0
SWH        6410.256 Hz
FIDRES     0.195625 Hz
AQ         2.5559540 sec
RG         4
DW         78.000 usec
DE         115.71 usec
TE         298.0 K

F2 - Processing parameters
SI         32768
SF         399.7627611 MHz
WDW        EM
SSB        0
LB         0.30 Hz
GB         0
PC         1.00

```

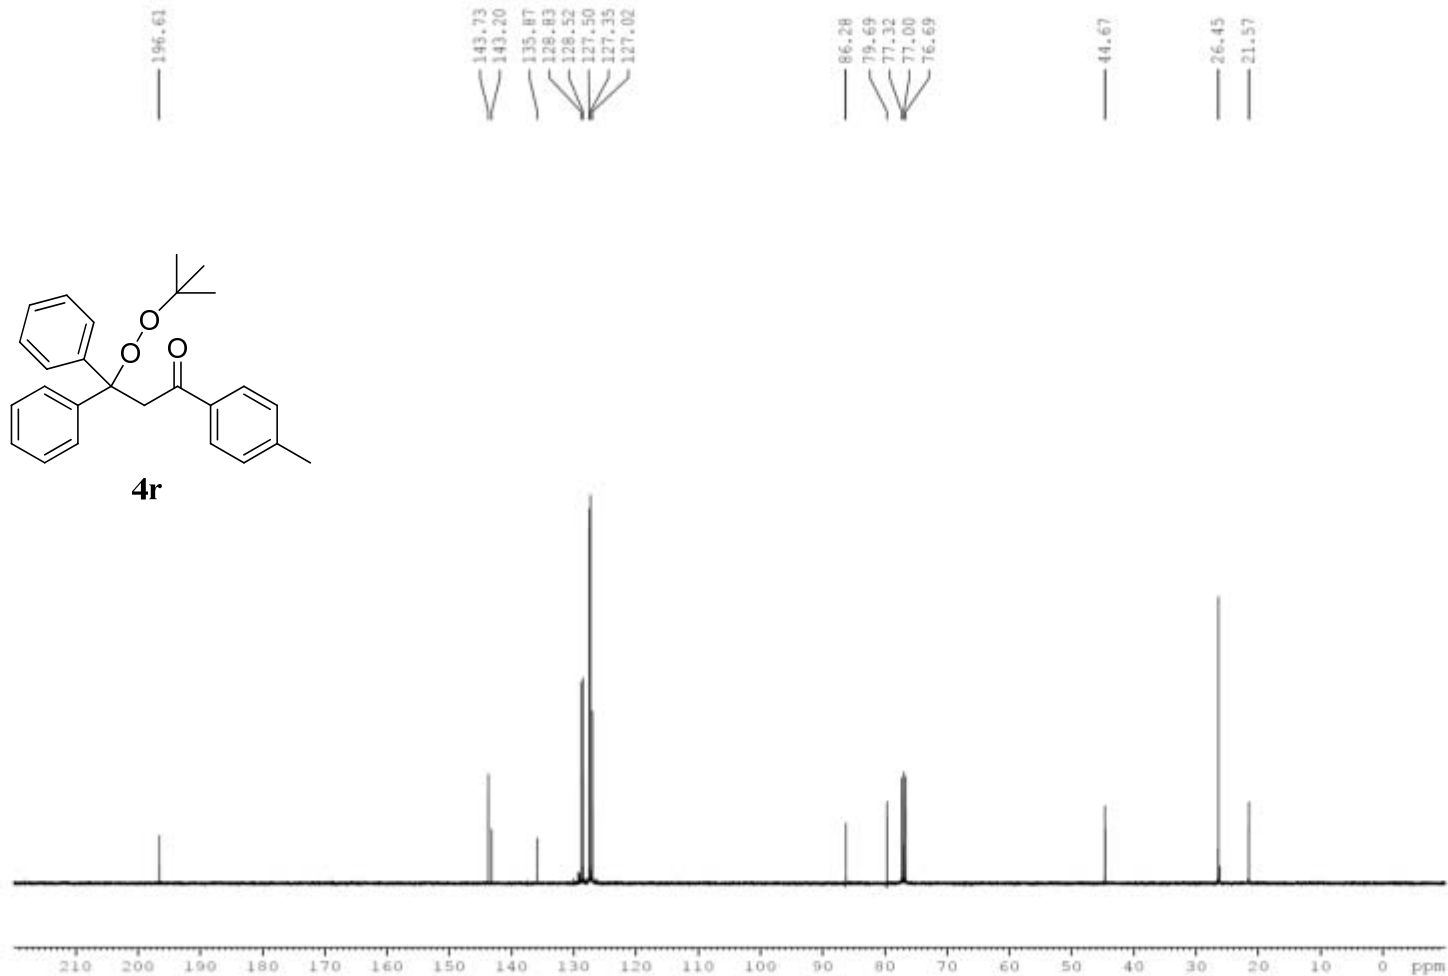

Current Data Parameters  
 NAME 1011-1-2-G-C-4.fid  
 EXPNO 1  
 PROCNO 1

F2 - Acquisition Parameters  
 Date\_ 20131224  
 Time\_ 0.00  
 INSTRUM varian  
 PROBHD s2pul  
 FULPROG g2pul  
 TD 65536  
 SOLVENT cdcl3  
 NS 688  
 DS 0  
 SWH 25510.203 Hz  
 FIDRES 0.389255 Hz  
 AQ 1.3107700 sec  
 RG 4  
 DW 19.600 usec  
 DE 115.71 usec  
 TE 298.0 K

F2 - Processing parameters  
 SI 65536  
 SF 100.5218605 MHz  
 WDW EM  
 SSB 0  
 LB 0.30 Hz  
 GB 0  
 PC 1.00



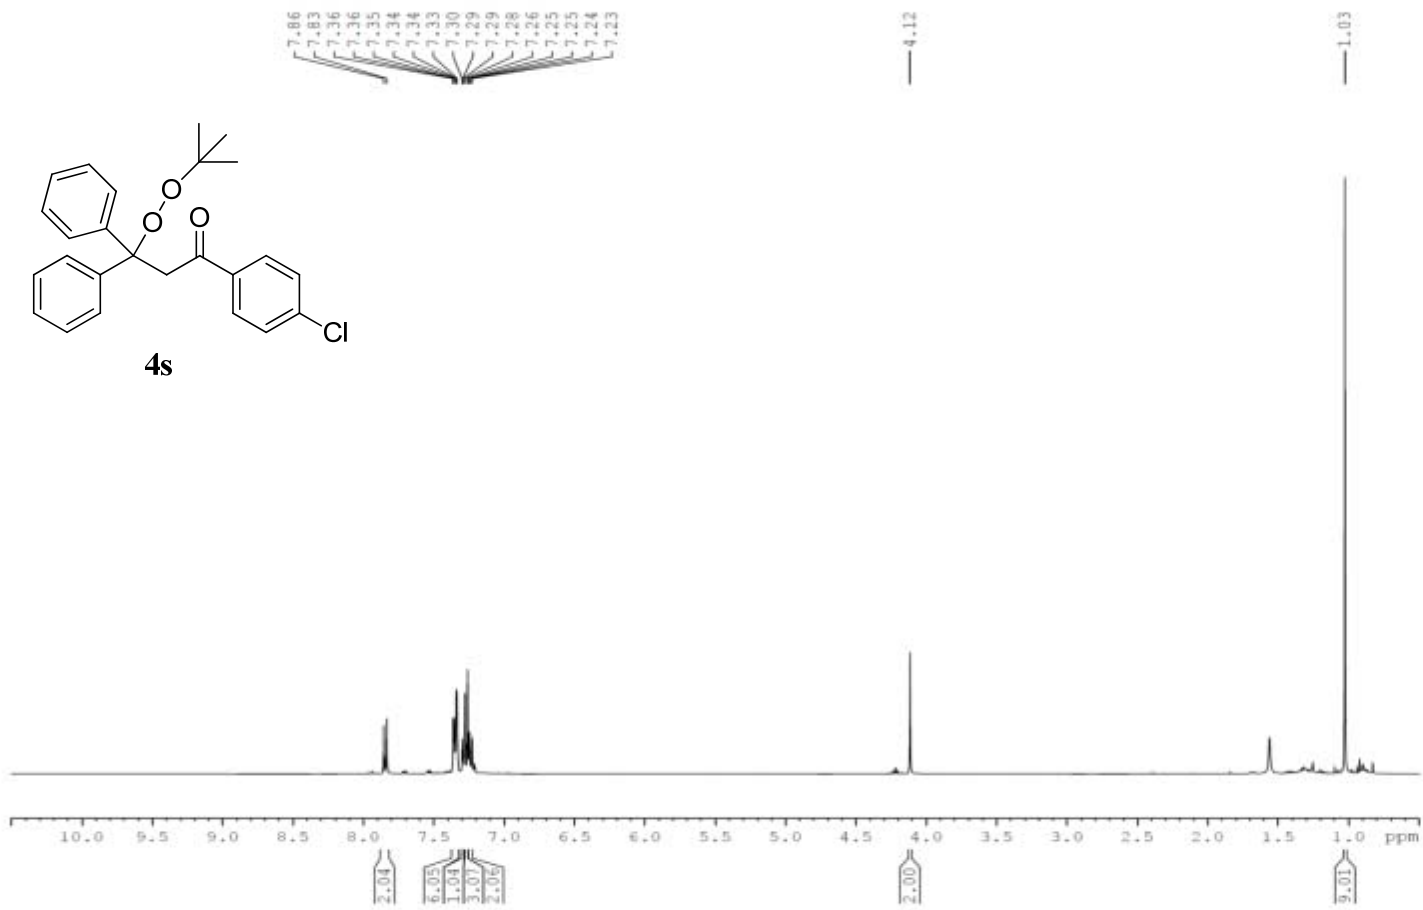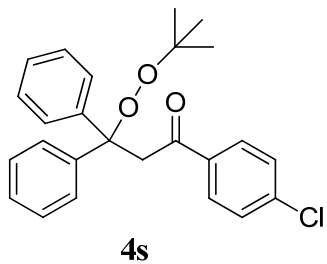

Current Data Parameters  
 NAME 1009-1-3-G.fid  
 EXPNO 1  
 PROCNO 1

F2 - Acquisition Parameters  
 Date\_ 20131224  
 Time\_ 0.00  
 INSTRUM varian  
 PROBHD  
 PULPROG s2pul  
 TD 32768  
 SOLVENT cdcl3  
 NS 40  
 DS 0  
 SWH 6410.256 Hz  
 FIDRES 0.195625 Hz  
 AQ 2.5559540 sec  
 RG 4  
 DW 78.000 usec  
 DE 115.71 usec  
 TE 298.0 K

F2 - Processing parameters  
 SI 32768  
 SF 399.7627613 MHz  
 WDW EM  
 SSB 0  
 LB 0.30 Hz  
 GB 0  
 PC 1.00

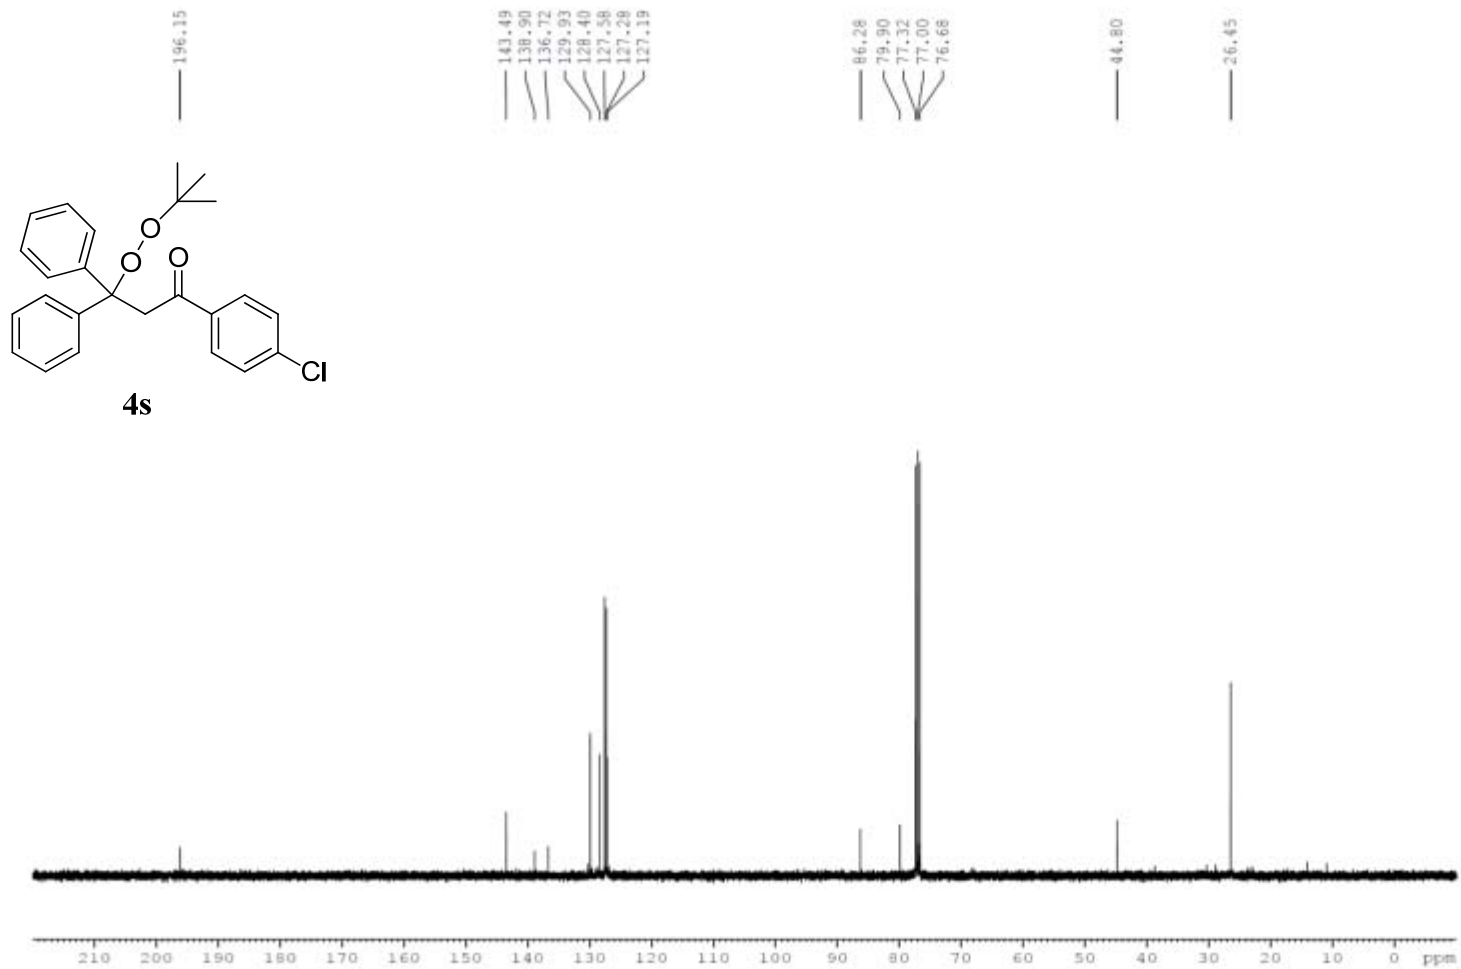

Current Data Parameters  
 NAME 1009-1-3-C-3-0.fid  
 EXPNO 1  
 PROCNO 1

F2 - Acquisition Parameters  
 Date\_ 20131222  
 Time\_ 0.00  
 INSTRUM varian  
 PROBHD sfpul  
 PULPROG zgpg30  
 TD 65536  
 SOLVENT cdcl3  
 NS 1240  
 DS 0  
 SWH 25510.203 Hz  
 FIDRES 0.389255 Hz  
 AQ 1.3107700 sec  
 RG 4  
 DW 19.600 usec  
 DE 115.71 usec  
 TE 298.0 K

F2 - Processing parameters  
 SI 65536  
 SF 100.5218574 MHz  
 WDW EM  
 SSB 0  
 LB 0.30 Hz  
 GB 0  
 PC 1.00

7.42  
7.41  
7.39  
7.38  
7.35  
7.33  
7.31  
7.29  
7.26  
7.25  
7.24  
7.23  
7.22  
7.21  
7.20  
4.29  
4.29  
4.28  
4.27  
4.28  
3.99  
3.98  
3.97  
3.96  
3.78  
3.77  
3.76  
3.75  
3.75  
3.73  
3.73  
3.72  
3.71  
3.70  
3.70  
3.59  
3.57  
3.55  
3.29  
3.27  
3.25  
2.33  
2.32  
2.32  
2.29  
2.29  
2.28  
2.19  
2.17  
2.15  
2.13  
2.07  
2.05  
2.03  
2.01  
1.67  
1.66  
1.37  
1.36  
1.34  
1.28  
1.25  
1.24

Current Data Parameters  
 NAME 1093-2.fid  
 EXPNO 1  
 PROCNO 1

F2 - Acquisition Parameters  
 Date\_ 20140714  
 Time 0.00  
 INSTRUM varian  
 PROBHD  
 PULPROG s2pul  
 TD 32768  
 SOLVENT cdcl3  
 NS 32  
 DS 0  
 SWH 6402.049 Hz  
 FIDRES 0.195375 Hz  
 AQ 2.5559540 sec  
 RG 4  
 DW 78.100 usec  
 DE 115.71 usec  
 TE 298.0 K

F2 - Processing parameters  
 SI 32768  
 SF 399.7627603 MHz  
 WDW EM  
 SSB 0  
 LB 0.30 Hz  
 GB 0  
 PC 1.00

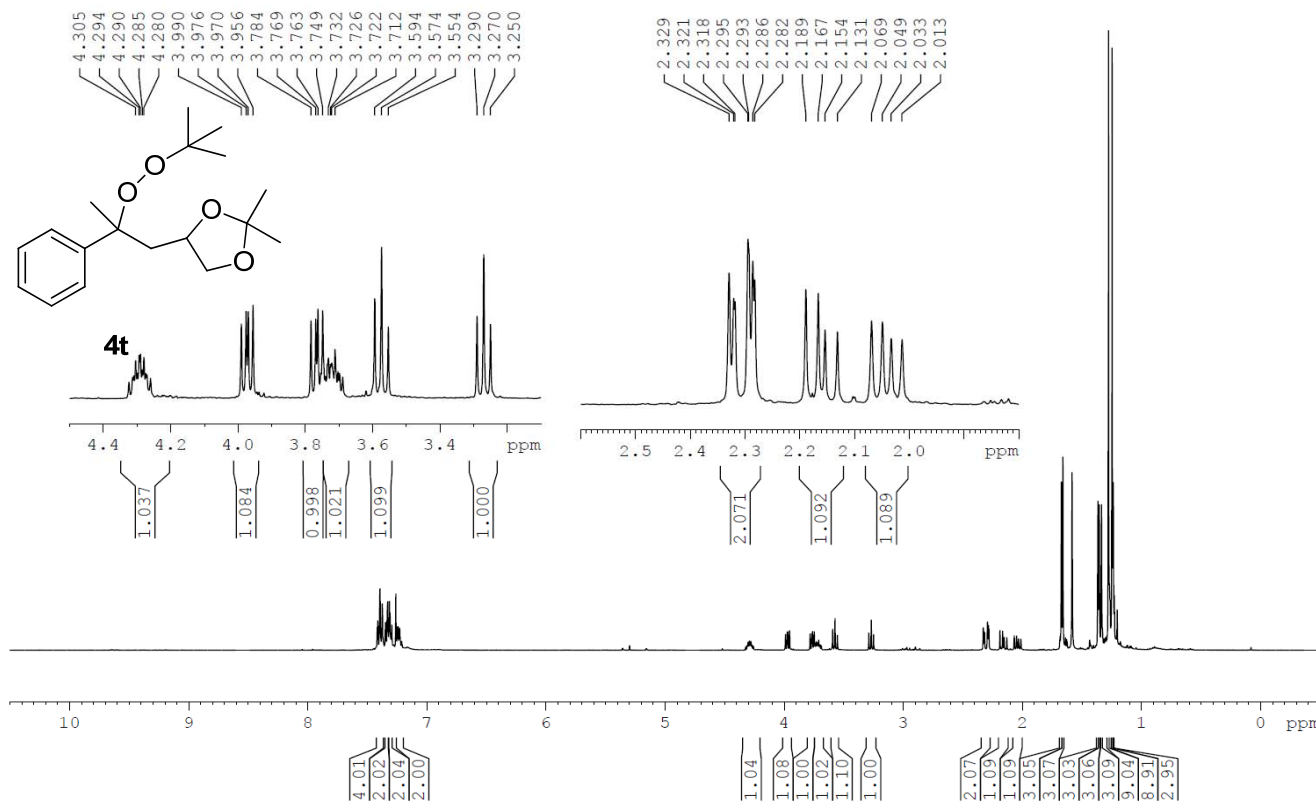

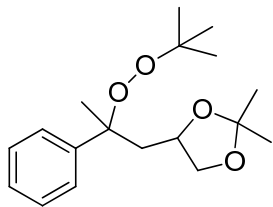

4t

107.783  
107.489

145.55  
143.93  
128.05  
127.91  
126.85  
126.78  
125.45  
125.44  
107.78  
107.49  
82.59  
82.06  
79.21  
79.04  
77.32  
77.00  
76.68  
72.98  
72.72  
70.44  
70.25  
44.85  
44.26  
26.85  
26.79  
26.70  
26.10  
25.85  
25.81  
24.37

82.587  
82.062

79.210  
79.044

26.849  
26.790  
26.701

26.100  
25.849  
25.809

24.366

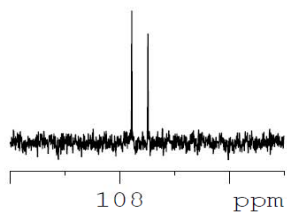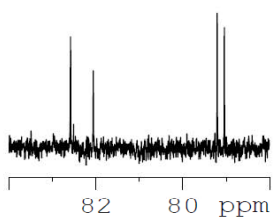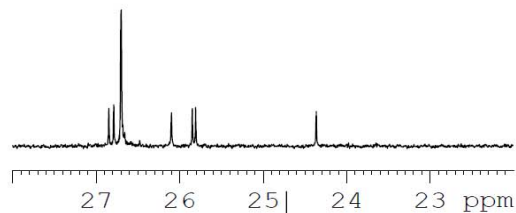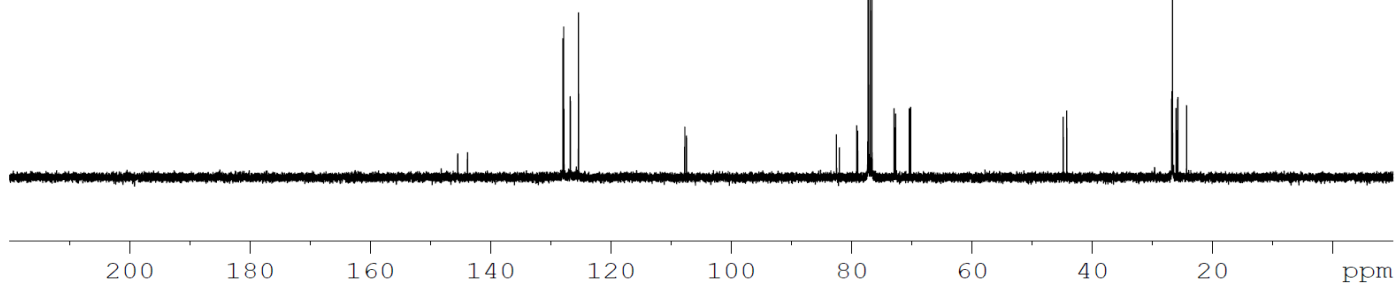

Current Data Parameters  
NAME 1093-2-C-5.fid  
EXPNO 1  
PROCNO 1

F2 - Acquisition Parameters  
Date\_ 20140714  
Time\_ 0.00  
INSTRUM varian  
PROBHD  
PULPROG s2pul  
TD 65536  
SOLVENT cdcl3  
NS 1320  
DS 0  
SWH 25510.203 Hz  
FIDRES 0.389255 Hz  
AQ 1.3107700 sec  
RG 4  
DW 19.600 usec  
DE 115.71 usec  
TE 298.0 K

F2 - Processing parameters  
SI 65536  
SF 100.5218558 MHz  
WDW EM  
SSB 0  
LB 0.30 Hz  
GB 0  
PC 1.00

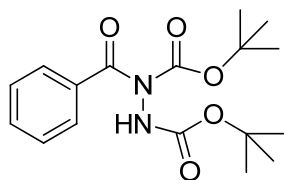

5

7.70  
7.52  
7.51  
7.49  
7.43  
7.41  
7.39  
7.26  
6.80

1.50  
1.23

Current Data Parameters  
NAME 1116-1-1-H-G.fid  
EXPNO 1  
PROCNO 1

F2 - Acquisition Parameters  
Date\_ 20141001  
Time\_ 0.00  
INSTRUM varian  
PROBHD  
PULPROG s2pul  
TD 32768  
SOLVENT cdcl3  
NS 32  
DS 0  
SWH 6410.256 Hz  
FIDRES 0.195625 Hz  
AQ 2.5559540 sec  
RG 4  
DW 78.000 usec  
DE 115.71 usec  
TE 298.0 K

F2 - Processing parameters  
SI 32768  
SF 399.7627610 MHz  
WDW EM  
SSB 0  
LB 0.30 Hz  
GB 0  
PC 1.00

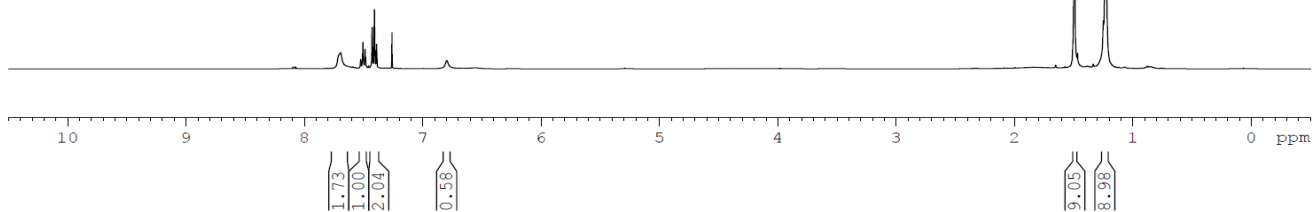

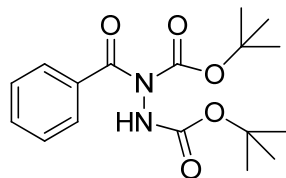

5

154.53  
151.71

131.73  
128.15  
128.08

84.42  
82.21  
77.32  
77.00  
76.68

28.12  
27.40

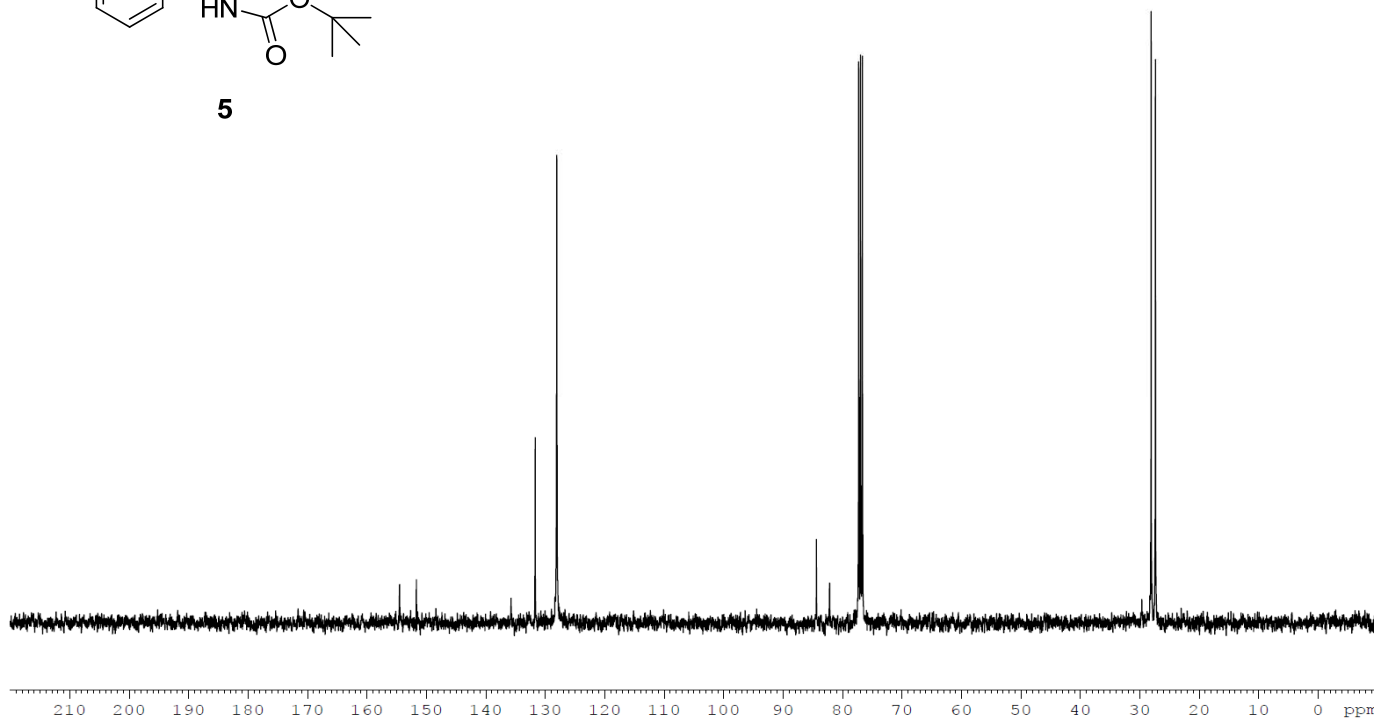

Current Data Parameters  
NAME 1116-1-1-H-G-C-4.fid  
EXPNO 1  
PROCNO 1

F2 - Acquisition Parameters  
Date\_ 20141001  
Time\_ 0.00  
INSTRUM varian  
PROBHD  
PULPROG s2pul  
TD 65536  
SOLVENT cdcl3  
NS 400  
DS 0  
SWH 25510.203 Hz  
FIDRES 0.389255 Hz  
AQ 1.3107700 sec  
RG 4  
DW 19.600 usec  
DE 115.71 usec  
TE 298.0 K

F2 - Processing parameters  
SI 65536  
SF 100.5218568 MHz  
WDW EM  
SSB 0  
LB 3.00 Hz  
GB 0  
PC 1.00

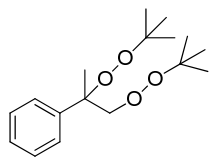

11a

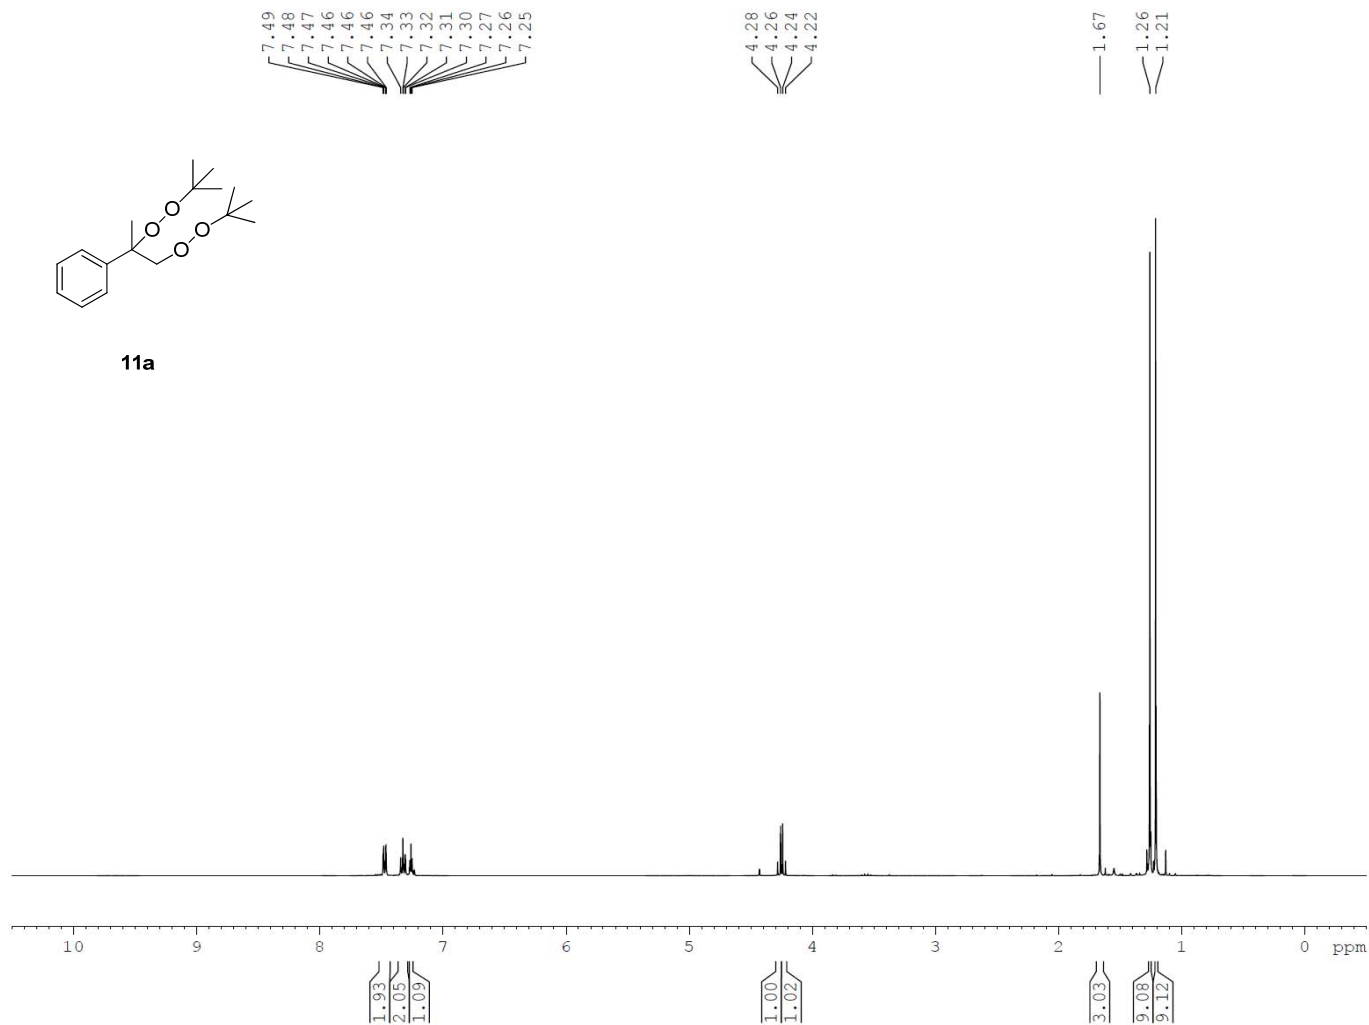

Current Data Parameters  
 NAME ES-1-19-3.fid  
 EXPNO 1  
 PROCNO 1

F2 - Acquisition Parameters  
 Date\_ 20140729  
 Time\_ 0.00  
 INSTRUM varian  
 PROBHD  
 PULPROG s2pul  
 TD 32768  
 SOLVENT cdcl3  
 NS 24  
 DS 0  
 SWH 6402.049 Hz  
 FIDRES 0.195375 Hz  
 AQ 2.5559540 sec  
 RG 4  
 DW 78.100 usec  
 DE 115.71 usec  
 TE 298.0 K

F2 - Processing parameters  
 SI 32768  
 SF 399.7627607 MHz  
 WDW EM  
 SSB 0  
 LB 0.30 Hz  
 GB 0  
 PC 1.00

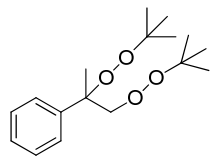

11a

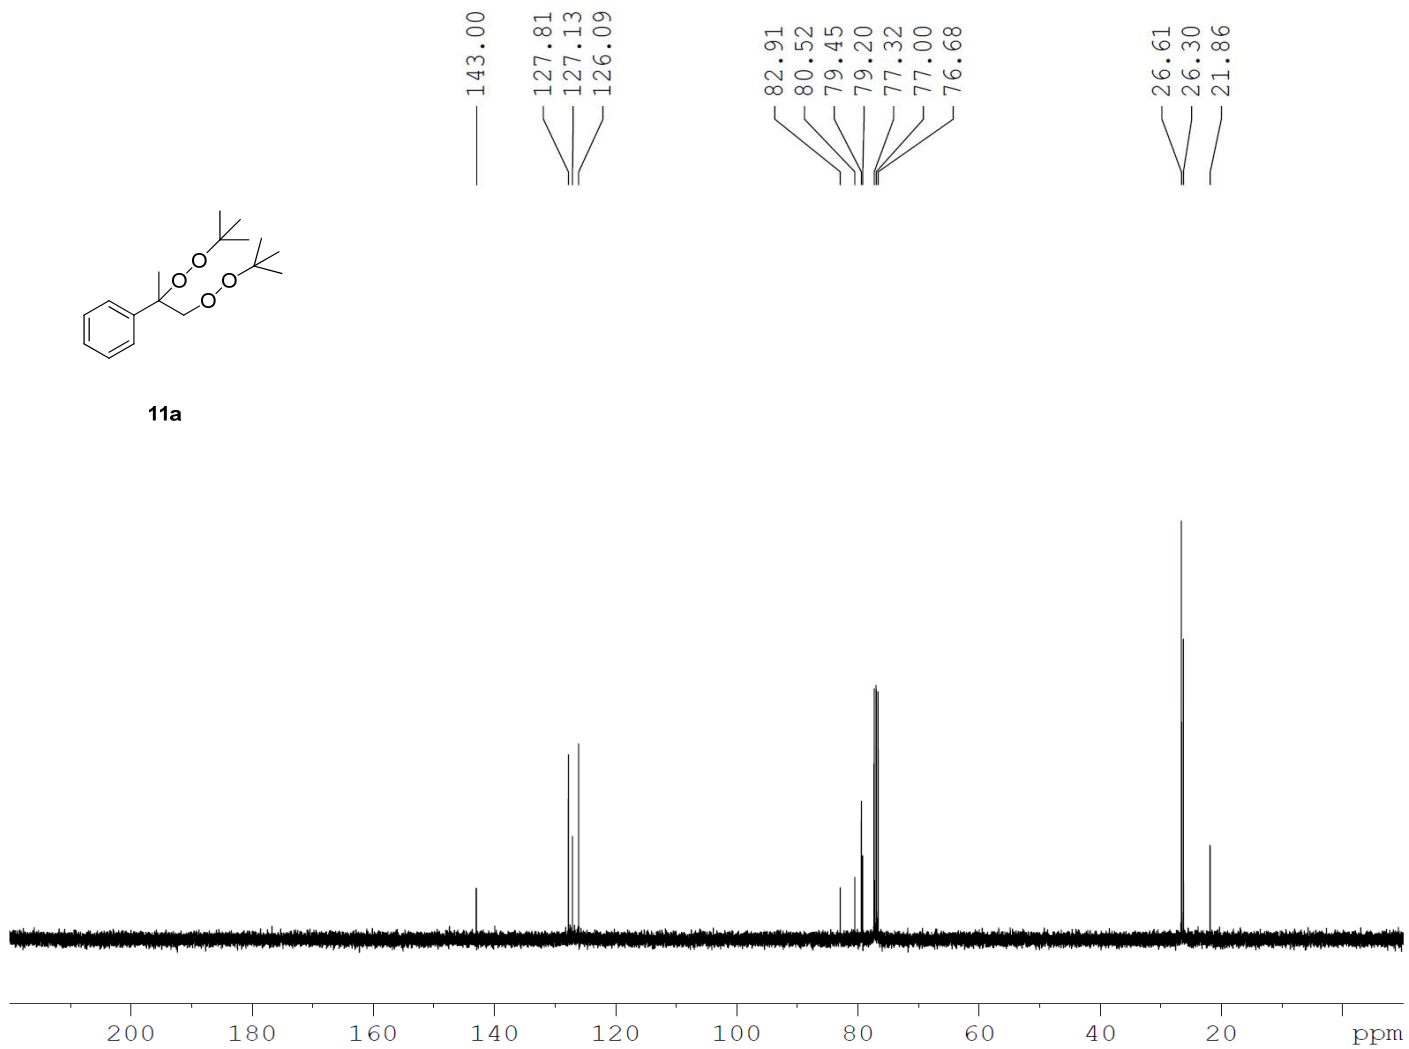

Current Data Parameters  
 NAME ES-1-19-3-C-3.fid  
 EXPNO 1  
 PROCNO 1

F2 - Acquisition Parameters  
 Date\_ 20140729  
 Time\_ 0.00  
 INSTRUM varian  
 PROBHD  
 PULPROG s2pul  
 TD 65536  
 SOLVENT cdcl3  
 NS 164  
 DS 0  
 SWH 25510.203 Hz  
 FIDRES 0.389255 Hz  
 AQ 1.3107700 sec  
 RG 4  
 DW 19.600 usec  
 DE 115.71 usec  
 TE 298.0 K

F2 - Processing parameters  
 SI 65536  
 SF 100.5218551 MHz  
 WDW EM  
 SSB 0  
 LB 0.30 Hz  
 GB 0  
 PC 1.00



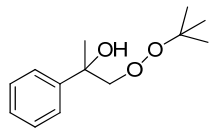

11b

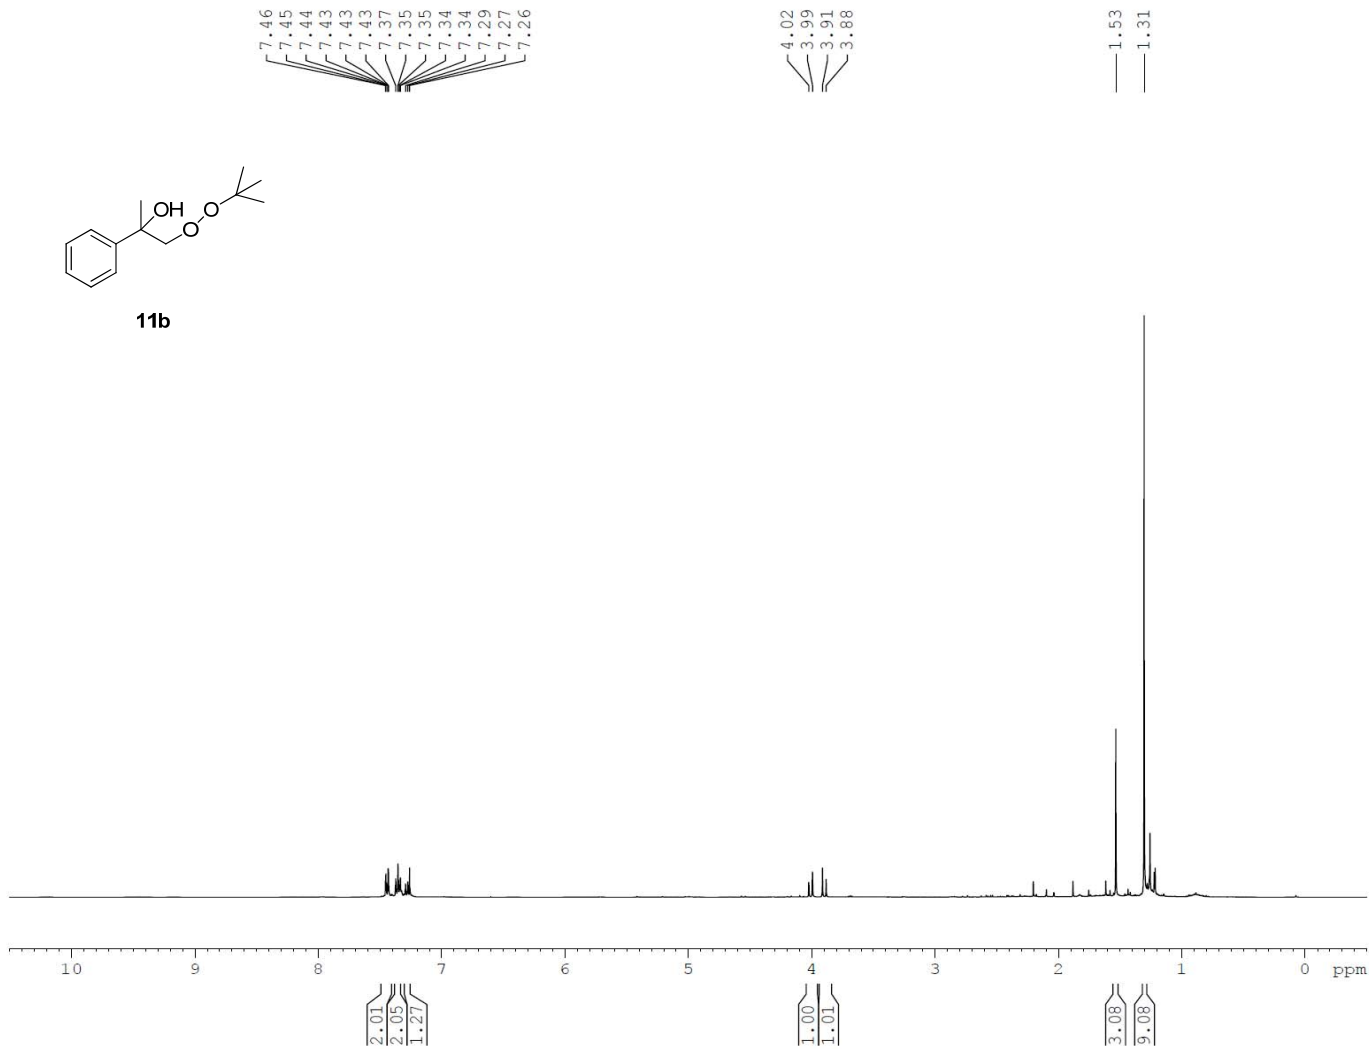

Current Data Parameters  
 NAME 1087-1-1.fid  
 EXPNO 1  
 PROCNO 1

F2 - Acquisition Parameters  
 Date\_ 20140725  
 Time\_ 0.00  
 INSTRUM varian  
 PROBHD  
 PULPROG s2pul  
 TD 32768  
 SOLVENT cdcl3  
 NS 32  
 DS 0  
 SWH 6410.256 Hz  
 FIDRES 0.195625 Hz  
 AQ 2.5559540 sec  
 RG 4  
 DW 78.000 usec  
 DE 115.71 usec  
 TE 298.0 K

F2 - Processing parameters  
 SI 32768  
 SF 399.7627611 MHz  
 WDW EM  
 SSB 0  
 LB 0.30 Hz  
 GB 0  
 PC 1.00

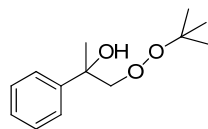

11b

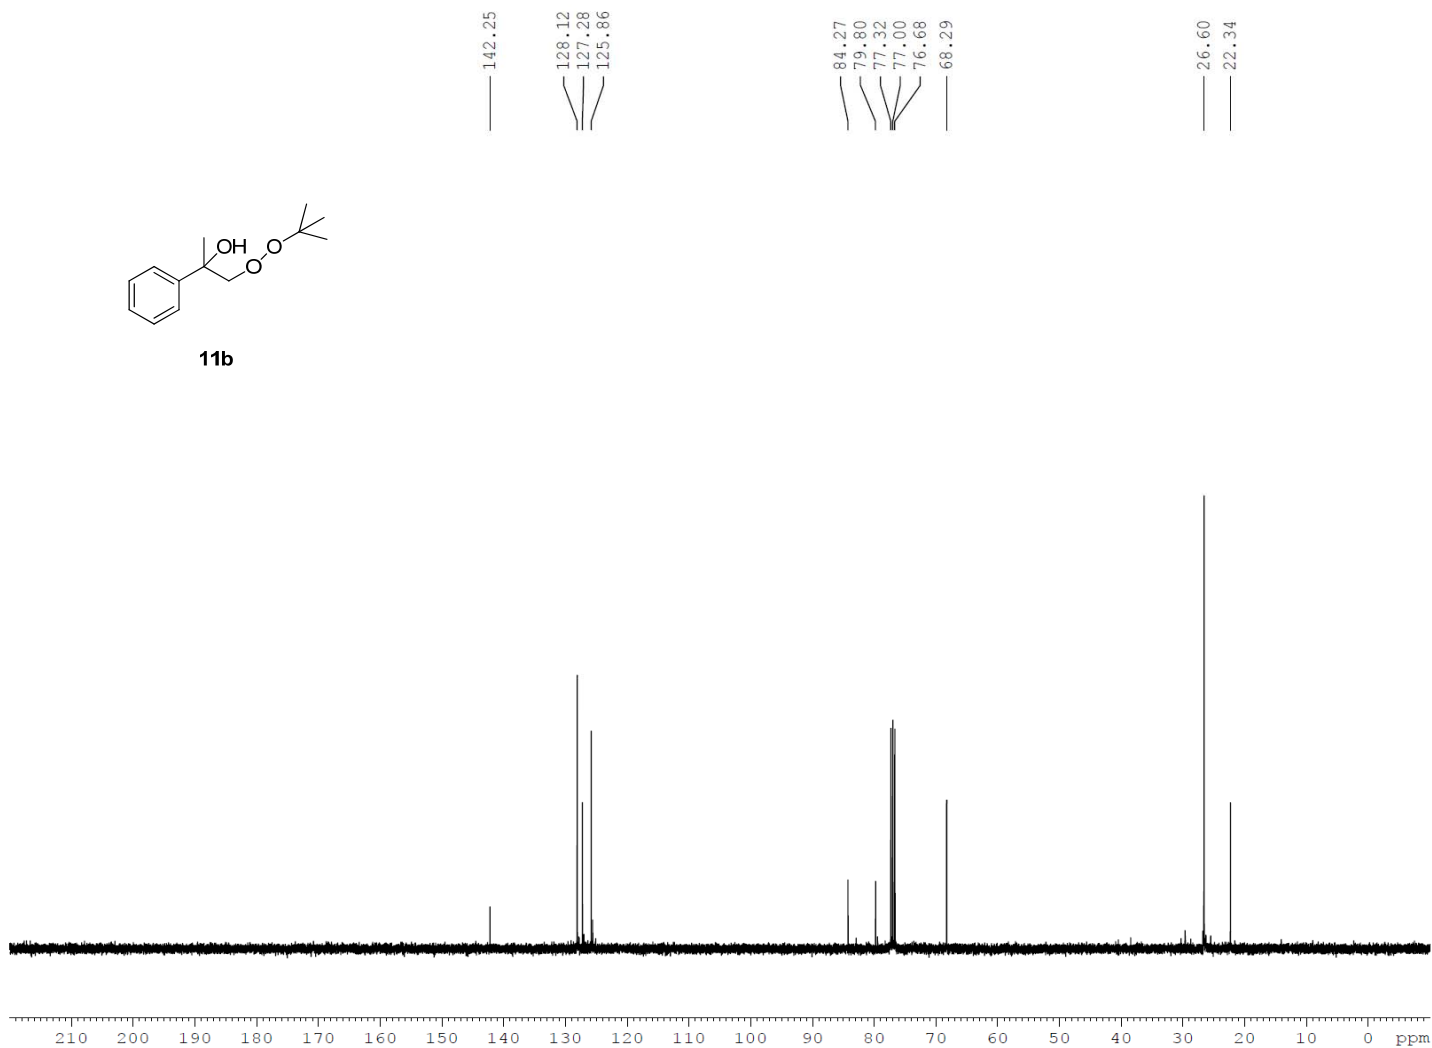

Current Data Parameters  
 NAME 1087-1-C-5.fid  
 EXPNO 1  
 PROCNO 1

F2 - Acquisition Parameters  
 Date\_ 20140725  
 Time\_ 0.00  
 INSTRUM varian  
 PROBHD  
 PULPROG s2pul  
 TD 65536  
 SOLVENT cdcl3  
 NS 480  
 DS 0  
 SWH 25510.203 Hz  
 FIDRES 0.389255 Hz  
 AQ 1.3107700 sec  
 RG 4  
 DW 19.600 usec  
 DE 115.71 usec  
 TE 298.0 K

F2 - Processing parameters  
 SI 65536  
 SF 100.5218562 MHz  
 WDW EM  
 SSB 0  
 LB 0.30 Hz  
 GB 0  
 PC 1.00

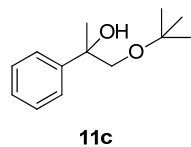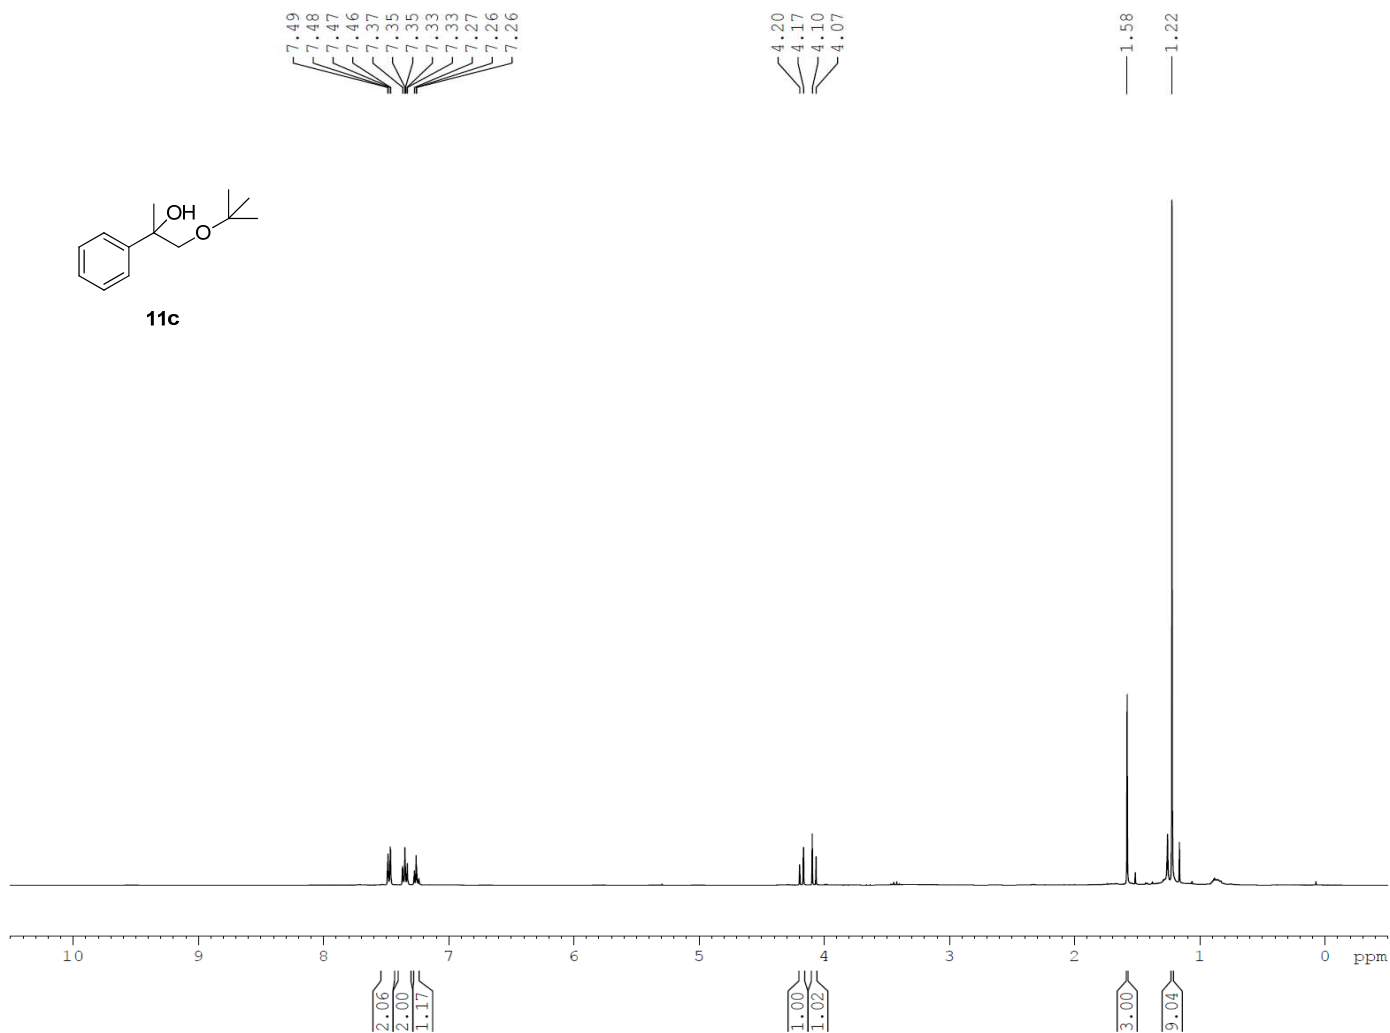

Current Data Parameters  
 NAME ES-1-19-4-1-H-G.fid  
 EXPNO 1  
 PROCNO 1

F2 - Acquisition Parameters  
 Date\_ 20140930  
 Time\_ 0.00  
 INSTRUM varian  
 PROBHD  
 PULPROG s2pul  
 TD 32768  
 SOLVENT cdcl3  
 NS 48  
 DS 0  
 SWH 6410.256 Hz  
 FIDRES 0.195625 Hz  
 AQ 2.5559540 sec  
 RG 4  
 DW 78.000 usec  
 DE 115.71 usec  
 TE 298.0 K

F2 - Processing parameters  
 SI 32768  
 SF 399.7627611 MHz  
 WDW EM  
 SSB 0  
 LB 0.30 Hz  
 GB 0  
 PC 1.00

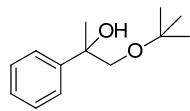

11c

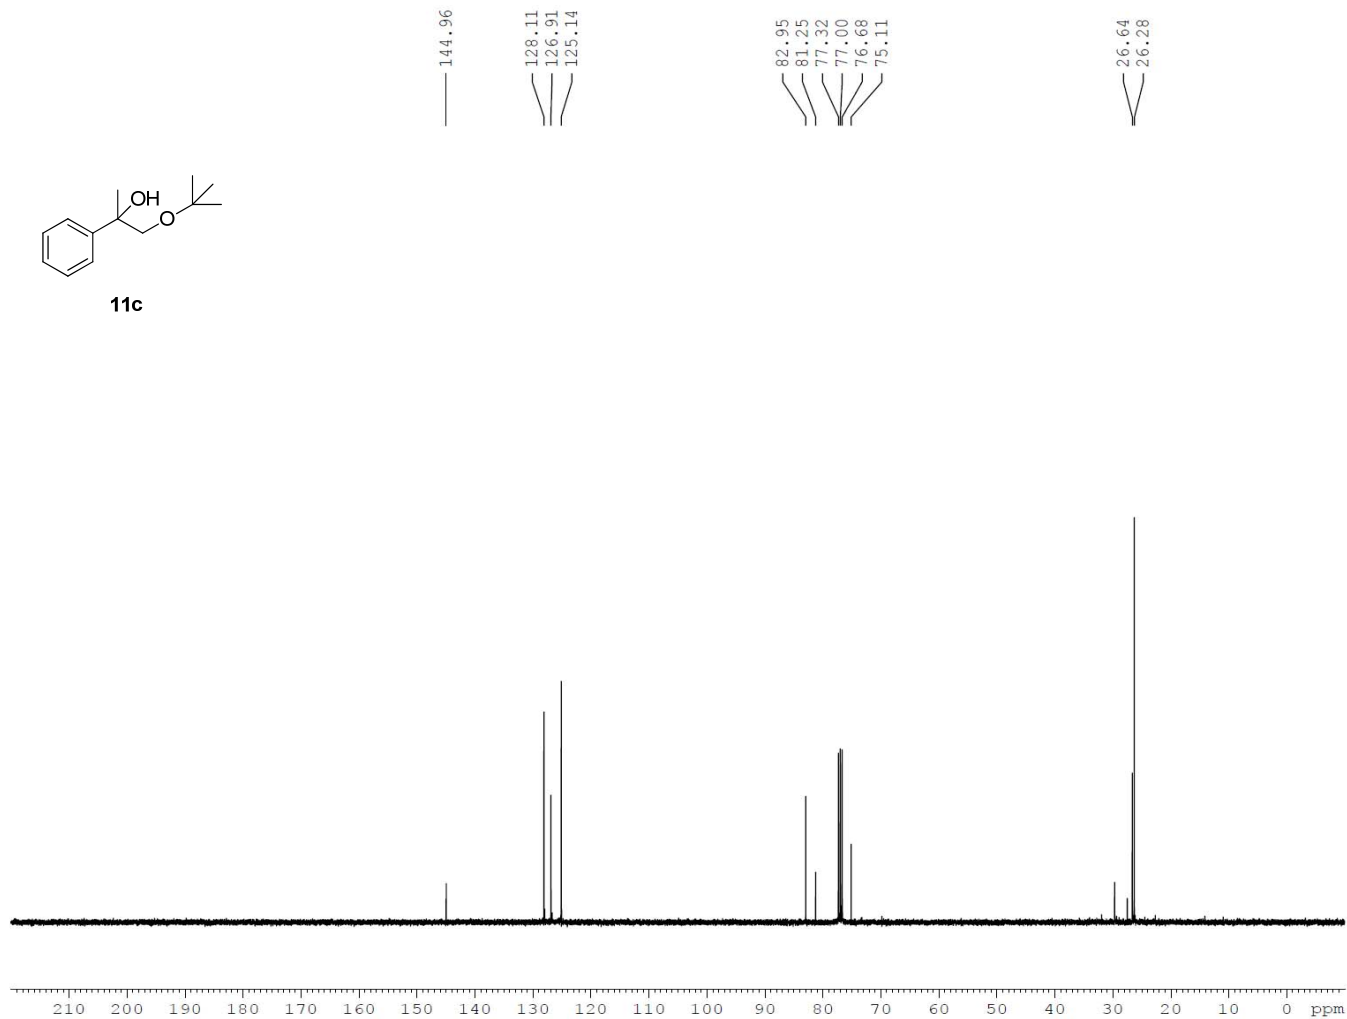

Current Data Parameters  
 NAME ES-1-19-4-1-C-G-7.fid  
 EXPNO 1  
 PROCNO 1

F2 - Acquisition Parameters  
 Date\_ 20140930  
 Time\_ 0.00  
 INSTRUM varian  
 PROBHD  
 PULPROG s2pul  
 TD 65536  
 SOLVENT cdcl3  
 NS 1000  
 DS 0  
 SWH 25510.203 Hz  
 FIDRES 0.389255 Hz  
 AQ 1.3107700 sec  
 RG 4  
 DW 19.600 usec  
 DE 115.71 usec  
 TE 298.0 K

F2 - Processing parameters  
 SI 65536  
 SF 100.5218563 MHz  
 WDW EM  
 SSB 0  
 LB 0.30 Hz  
 GB 0  
 PC 1.00

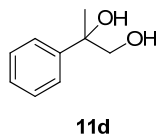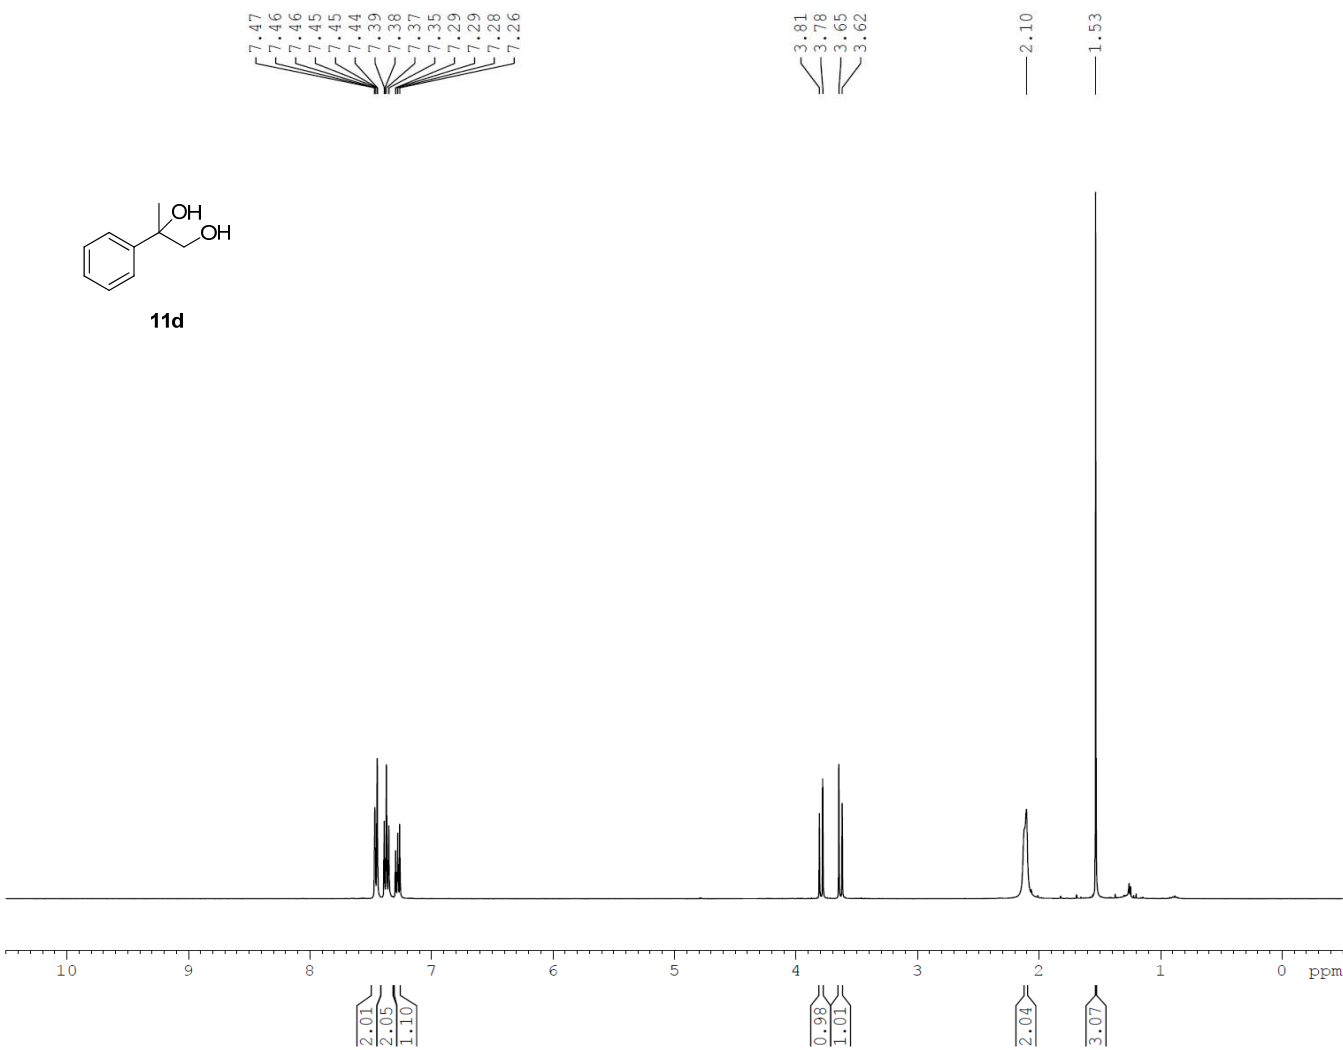

Current Data Parameters  
 NAME ES-1-19-5.fid  
 EXPNO 1  
 PROCNO 1

F2 - Acquisition Parameters  
 Date 20140729  
 Time 0.00  
 INSTRUM varian  
 PROBHD  
 PULPROG s2pul  
 TD 32768  
 SOLVENT cdcl3  
 NS 24  
 DS 0  
 SWH 6410.256 Hz  
 FIDRES 0.195625 Hz  
 AQ 2.5559540 sec  
 RG 4  
 DW 78.000 usec  
 DE 115.71 usec  
 TE 298.0 K

F2 - Processing parameters  
 SI 32768  
 SF 399.7627612 MHz  
 WDW EM  
 SSB 0  
 LB 0.30 Hz  
 GB 0  
 PC 1.00

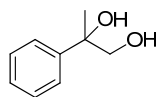

11d

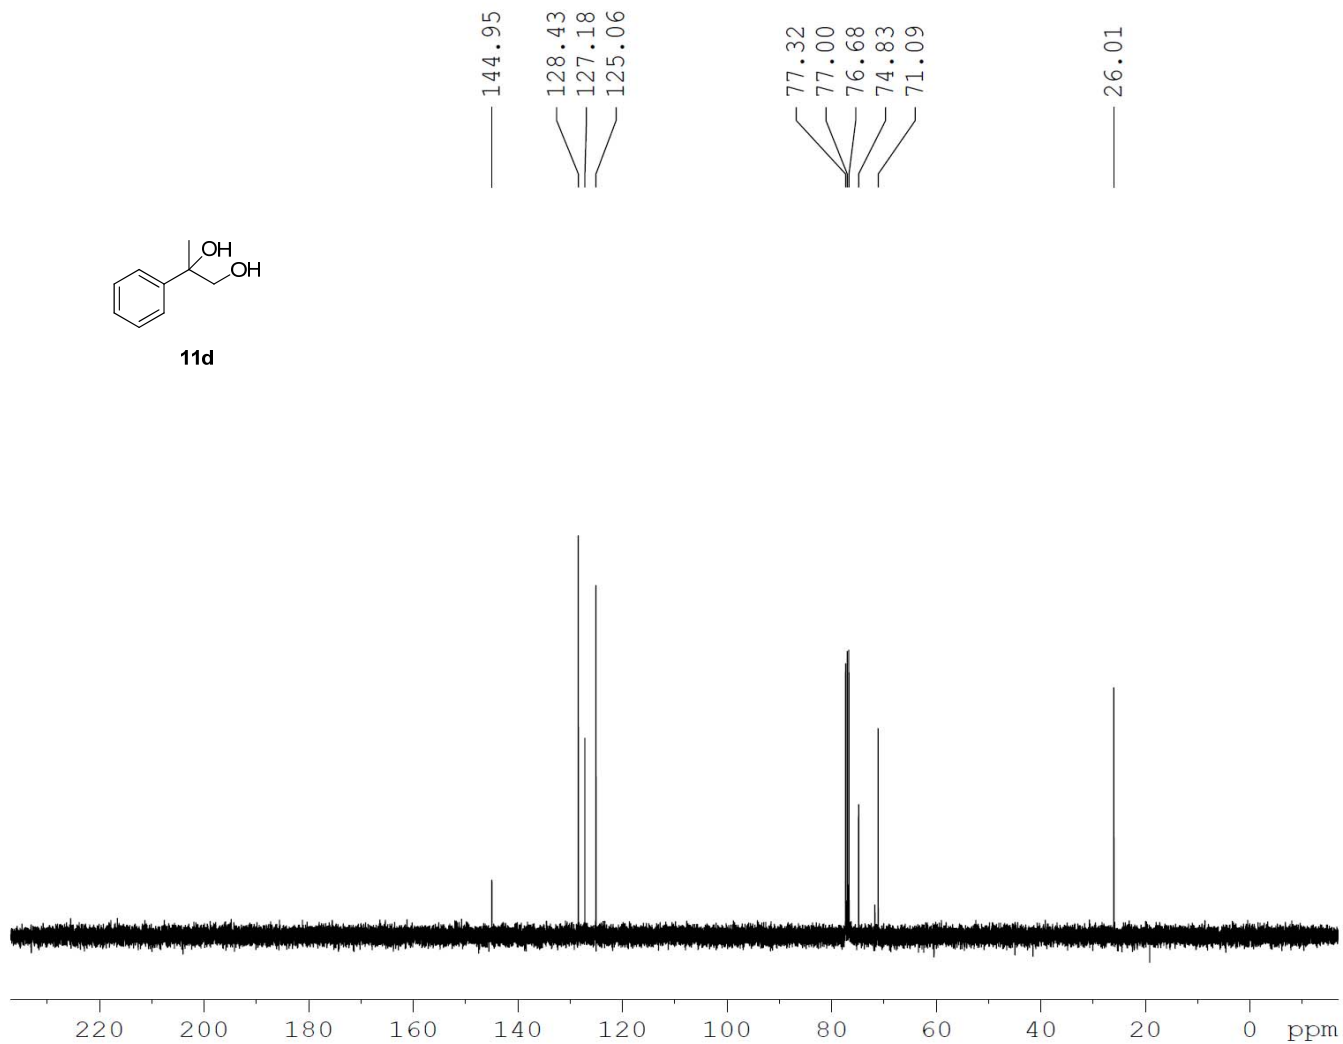

Current Data Parameters  
NAME ES-1-19-5-C-3.fid  
EXPNO 1  
PROCNO 1

F2 - Acquisition Parameters  
Date\_ 20140729  
Time\_ 0.00  
INSTRUM varian  
PROBHD  
PULPROG s2pul  
TD 65536  
SOLVENT cdcl3  
NS 132  
DS 0  
SWH 25510.203 Hz  
FIDRES 0.389255 Hz  
AQ 1.3107700 sec  
RG 4  
DW 19.600 usec  
DE 115.71 usec  
TE 298.0 K

F2 - Processing parameters  
SI 65536  
SF 100.5218566 MHz  
WDW EM  
SSB 0  
LB 0.30 Hz  
GB 0  
PC 1.00
